# Supplementary material for: Origins and functional consequences of somatic mitochondrial DNA mutations in human cancer
Source: eLife journal article supplement (doi:10.7554/elife.02935), 2014-09-30
Supplement: supp [file elife-02935-supp-v1.zip]

WGS

WXS

20

1

Germline subs.  
in WGS

8

- 6 are low heteroplasmy (3.36% - 8.68%)
- 5 have corresponding variant reads though it does not reach threshold
- 3 showed low read-depth, which may be insufficient for variant calling
