# Supplementary material for: Origins and functional consequences of somatic mitochondrial DNA mutations in human cancer
Source: eLife journal article supplement (doi:10.7554/elife.02935), 2014-09-30
Supplement: supp [file elife-02935-supp-v1.zip]

Archive with 18 entries (18 files):
- elife_poa_e02935_Supplementary_File_3.xlsx
- elife_poa_e02935_Figure_5_figure_supplement_3.pdf
- elife_poa_e02935_Supplementary_File_4.xls
- elife_poa_e02935_Figure_1_figure_supplement_1.pdf
- elife_poa_e02935_Supplementary_File_5.xlsx
- elife_poa_e02935_Figure_1_figure_supplement_3.pdf
- elife_poa_e02935_Figure_5_figure_supplement_1.pdf
- elife_poa_e02935_Figure_4_figure_supplement_2.pdf
- elife_poa_e02935_Supplementary_File_6.xlsx
- elife_poa_e02935_Figure_1_figure_supplement_2.pdf
- elife_poa_e02935_Figure_1_figure_supplement_4.pdf
- elife_poa_e02935_Figure_2_figure_supplement_1.pdf
- elife_poa_e02935_Supplementary_File_2.xlsx
- elife_poa_e02935_Figure_4_figure_supplement_1.pdf
- elife_poa_e02935_Figure_3_figure_supplement_1.pdf
- elife_poa_e02935_Figure_1_figure_supplement_5.pdf
- elife_poa_e02935_Figure_5_figure_supplement_2.pdf
- elife_poa_e02935_Supplementary_File_1.xlsx
