# Supplementary material for: Origins and functional consequences of somatic mitochondrial DNA mutations in human cancer
Source: eLife journal article supplement (doi:10.7554/elife.02935), 2014-09-30
Supplement: supp [file elife-02935-supp-v1.zip › elife_poa_e02935_Supplementary_File_1.xlsx]

## Sheet: PrimaryCancer
index	Tumour_sampleID	TumourTypes	TumourSequencing	SeqCenter(Tumour)	#Reads_autosomes(Tumour)	#Reads_mito(Tumour)	Tumour_read_length(bp)	Normal_sampleID	NormalSequencing	SeqCenter(Normal)	#Reads_autosomes(Normal)	#Reads_mito(Normal)	Normal_read_length (bp)	Cross-contamination(Tumour)	95%up_Cross-contamination(Tumour)	Cross-contamination(Normal)	95%up_Cross-contamination(Normal)
15	PD10010a	Breast	WGS	CGP	1136884074	2364396	100	PD10010b	WGS	CGP	542097573	224516	100	0.0044843	0.00759	0	0
16	PD10014a	Breast	WGS	CGP	1102720510	1555586	100	PD10014b	WGS	CGP	544460329	371807	100	0.00566572	0.00901	0	0
18	PD10020a	Melanoma	WXS	CGP	291627027	110050	75	PD10020b	WXS	CGP	233946611	51503	75	0	0	0	0
19	PD10021a	Melanoma	WXS	CGP	277278120	289013	75	PD10021b	WXS	CGP	273801924	121713	75	0	0	0.00031736	0.00076
20	PD10022a	Melanoma	WXS	CGP	246992520	302747	75	PD10022b	WXS	CGP	284754752	100658	75	0.00223839	0.00379	0	0
21	PD10051a	MPD	WXS	CGP	74103985	2139	75	PD10051b	WXS	CGP	85776248	4957	75	0.00231054	0.00433	0.000825934	0.00197
22	PD10052a	MPD	WXS	CGP	71237180	2285	75	PD10052b	WXS	CGP	80252431	3977	75	0.00381194	0.00597	0.00412957	0.00615
23	PD10053a	MPD	WXS	CGP	76347337	1186	75	PD10053b	WXS	CGP	79994026	3448	75	0.00510638	0.00769	0.00347343	0.00562
24	PD10054a	MPD	WXS	CGP	79160546	1916	75	PD10054b	WXS	CGP	75685830	3324	75	0.00581703	0.00824	0.0121806	0.0159
25	PD10055a	MPD	WXS	CGP	70279793	1673	75	PD10055b	WXS	CGP	69096441	4252	75	0.00317125	0.00524	0.00884445	0.01245
26	PD10056a	MPD	WXS	CGP	72751996	2310	75	PD10056b	WXS	CGP	76961119	3192	75	0.0072214	0.01023	0.00507538	0.00749
27	PD10057a	MPD	WXS	CGP	79334713	3465	75	PD10057b	WXS	CGP	76920951	2558	75	0.00822751	0.01158	0.00833649	0.01181
28	PD10058a	MPD	WXS	CGP	69702694	1543	75	PD10058b	WXS	CGP	84002021	4222	75	0	0	0.00613121	0.00881
29	PD10059a	MPD	WXS	CGP	70864061	1964	75	PD10059b	WXS	CGP	79174811	3285	75	0.00631912	0.00941	0.00509005	0.00785
30	PD10060a	MPD	WXS	CGP	72041174	2436	75	PD10060b	WXS	CGP	74408478	4525	75	0.0194033	0.0246	0.00447511	0.007
31	PD10061a	MPD	WXS	CGP	68725227	1707	75	PD10061b	WXS	CGP	83470157	2539	75	0.00768278	0.01038	0.00858164	0.01138
32	PD10062a	MPD	WXS	CGP	79174356	2653	75	PD10062b	WXS	CGP	77225765	2850	75	0.0014082	0.00279	0.00601956	0.00896
33	PD10063a	MPD	WXS	CGP	72307914	2699	75	PD10063b	WXS	CGP	63748127	1302	75	0.00699029	0.01021	0.00470286	0.00748
35	PD11290a	Mesothelioma	WXS	CGP	85791634	15558	75	PD11290b	WXS	CGP	57278089	759	75	0.00189502	0.00356	0	0
36	PD11291a	Mesothelioma	WXS	CGP	68490713	38909	75	PD11291b	WXS	CGP	76528229	1080	75	0.00646436	0.00945	0.00939271	0.0128
37	PD11292a	Mesothelioma	WXS	CGP	91940038	19377	75	PD11292b	WXS	CGP	143010711	2032	75	0.0154775	0.0202	0.0115623	0.01505
38	PD11293a	Mesothelioma	WXS	CGP	104837103	7074	75	PD11293b	WXS	CGP	94738368	1966	75	0.00422982	0.00618	0.00425	0.00627
39	PD11294a	Mesothelioma	WXS	CGP	107729813	35729	75	PD11294b	WXS	CGP	85588491	578	75	0.00106185	0.0021	0.00466853	0.00703
40	PD11295a	Mesothelioma	WXS	CGP	126569703	24205	75	PD11295b	WXS	CGP	104740871	747	75	0.00145906	0.00247	0.000424313	0.00101
42	PD11328e	Prostate	WGS	CGP	1908217693	1491208	100	PD11328b	WGS	CGP	889225543	3565391	100	0.00216861	0.00429	0	0
43	PD11329a	Prostate	WGS	CGP	1898058941	3731347	100	PD11329b	WGS	CGP	1265435832	3959922	100	0.0033701	0.00536	0	0
44	PD11330c	Prostate	WGS	CGP	1820308414	4483424	100	PD11330b	WGS	CGP	941321463	973534	100	0	0	0	0
45	PD11331c	Prostate	WGS	CGP	1736635713	4037044	100	PD11331b	WGS	CGP	967982035	994245	100	0.000533476	0.00158	0	0
46	PD11332c	Prostate	WGS	CGP	1934353384	5109948	100	PD11332b	WGS	CGP	1019982971	1673371	100	0.00491703	0.00732	0	0
47	PD11333a	Prostate	WGS	CGP	1614927945	3502462	100	PD11333b	WGS	CGP	944346028	2894380	100	0.0148644	0.01945	0	0
48	PD11334a	Prostate	WGS	CGP	2085459998	5357628	100	PD11334b	WGS	CGP	948236584	1093907	100	0.00509183	0.00776	0	0
49	PD11335a	Prostate	WGS	CGP	1654674123	4981765	100	PD11335b	WGS	CGP	1173935886	1475908	100	0.0030622	0.00518	0	0
50	PD11336a	Breast	WGS	CGP	1068412685	1605898	100	PD11336b	WGS	CGP	690236447	95650	100	0	0	0	0
51	PD11337a	Breast	WGS	CGP	1255731906	2424586	100	PD11337b	WGS	CGP	600972316	58837	100	0.00282885	0.00509	0.00439802	0.0087
52	PD11338a	Breast	WGS	CGP	1265608843	1512625	100	PD11338b	WGS	CGP	617287697	73195	100	0	0	0	0
53	PD11339a	Breast	WGS	CGP	1347774579	2322151	100	PD11339b	WGS	CGP	589041977	54631	100	0.00276789	0.00482	0	0
54	PD11340a	Breast	WGS	CGP	1339142450	1839409	100	PD11340b	WGS	CGP	644930875	121112	100	0.00405862	0.00671	0	0
55	PD11341a	Breast	WGS	CGP	1262726613	1475312	100	PD11341b	WGS	CGP	586193308	79945	100	0.00166875	0.0033	0.00215054	0.00513
56	PD11342a	Breast	WGS	CGP	1141400774	1831470	100	PD11342b	WGS	CGP	574798135	56046	100	0	0	0	0
57	PD11343a	Breast	WGS	CGP	1068528165	1661401	100	PD11343b	WGS	CGP	499549325	63219	100	0	0	0	0
58	PD11369a	Breast	WGS	CGP	1118848903	2395505	100	PD11369b	WGS	CGP	519585500	187365	100	0.00973763	0.01423	0	0
59	PD11372a	Breast	WGS	CGP	987710773	1358936	100	PD11372b	WGS	CGP	532433729	191173	100	0.00386954	0.00673	0	0
60	PD11374a	Breast	WGS	CGP	870481031	858287	100	PD11374b	WGS	CGP	475823846	226671	100	0.00217077	0.00463	0	0
61	PD11375a	Breast	WGS	CGP	842187523	1614298	100	PD11375b	WGS	CGP	455421661	60744	100	0	0	0	0
62	PD11376a	Breast	WGS	CGP	808465192	3305385	100	PD11376b	WGS	CGP	454138194	145420	100	0.00127714	0.00305	0.00120337	0.00356
63	PD11377a	Breast	WGS	CGP	859048149	1363721	100	PD11377b	WGS	CGP	478721986	168785	100	0.000789889	0.00234	0	0
64	PD11379a	Breast	WGS	CGP	955287564	1733378	100	PD11379b	WGS	CGP	483937444	152840	100	0.00455063	0.0077	0.00227531	0.00543
65	PD11380a	Breast	WGS	CGP	994936769	2160569	100	PD11380b	WGS	CGP	421861337	112003	100	0.00117682	0.00281	0	0
66	PD11381a	Breast	WGS	CGP	934311802	1248338	100	PD11381b	WGS	CGP	460200670	93332	100	0	0	0.00145243	0.0043
67	PD11382a	Breast	WGS	CGP	882578587	2326243	100	PD11382b	WGS	CGP	450322231	232305	100	0.0478582	0.05816	0	0
68	PD11383a	Breast	WGS	CGP	787124841	1596017	100	PD11383b	WGS	CGP	414601930	194853	100	0.00552486	0.00961	0	0
69	PD11384a	Breast	WGS	CGP	869069346	1384997	100	PD11384b	WGS	CGP	424290447	317865	100	0	0	0	0
70	PD11385a	Breast	WGS	CGP	847420318	1278390	100	PD11385b	WGS	CGP	374873356	231258	100	0.0137881	0.01997	0	0
71	PD11389a	Breast	WGS	CGP	965929098	2091664	100	PD11389b	WGS	CGP	360198629	187148	100	0	0	0	0
72	PD11390a	Breast	WGS	CGP	954642471	1368578	100	PD11390b	WGS	CGP	320052712	293749	100	0.00209717	0.00447	0.00606673	0.01292
73	PD11391a	Breast	WGS	CGP	118638902	246793	100	PD11391b	WGS	CGP	150173213	150187	100	0	0	0	0
74	PD11394a	Breast	WGS	CGP	968185588	2167836	100	PD11394b	WGS	CGP	468119193	246821	100	0	0	0.00263852	0.00629
75	PD11396a	Breast	WGS	CGP	803126973	1299422	100	PD11396b	WGS	CGP	474938973	292130	100	0.00260926	0.00516	0	0
76	PD11398a	Breast	WGS	CGP	810270363	1712224	100	PD11398b	WGS	CGP	538979013	365525	100	0	0	0.00271248	0.00578
77	PD11399a	Breast	WGS	CGP	878239829	941341	100	PD11399b	WGS	CGP	479544501	291142	100	0	0	0.001386	0.0041
78	PD11403a	Head&Neck	WXS	CGP	29101464	2509	100	PD11403b	WXS	CGP	43799666	1137	100	0.00339415	0.00672	0	0
79	PD11404a	Head&Neck	WXS	CGP	46129892	5610	101	PD11404b	WXS	CGP	30961789	460	101	0.00449102	0.00742	0	0
80	PD11405a	Head&Neck	WXS	CGP	32536446	1163	101	PD11405b	WXS	CGP	38709404	740	101	0	0	0.000605877	0.00179
81	PD11406a	MPD	WGS	CGP	944124180	310180	100	PD11406b	WGS	CGP	1064708396	788724	100	0	0	0	0
82	PD11411a	Chordoma	WGS	CGP	112410740	140341	100	PD11411b	WGS	CGP	357935324	111378	100	0	0	0	0
84	PD11421a	Chordoma	WGS	CGP	174765728	822363	100	PD11421b	WGS	CGP	175855387	62521	100	0	0	0	0
85	PD11424a	Chordoma	WGS	CGP	139772838	357617	100	PD11424b	WGS	CGP	158039327	37688	100	0	0	0	0
86	PD11471a	MPD	WGS	CGP	1011440454	277994	100	PD11471b	WGS	CGP	1077170308	738808	100	0	0	0.00158562	0.00338
87	PD11781a	Lymphoma	WXS	CGP	117563199	9605	75	PD11781b	WXS	CGP	142495577	2900	75	0.0127407	0.01536	0.00625978	0.00811
88	PD11783a	Lymphoma	WXS	CGP	97995103	13815	75	PD11783b	WXS	CGP	92088422	8585	75	0.00621384	0.00847	0.00531915	0.0074
89	PD11795a	Lymphoma	WXS	CGP	100763529	31684	75	PD11795b	WXS	CGP	75113718	4497	75	0.00548879	0.00748	0.0108641	0.0141
90	PD11800a	Lymphoma	WXS	CGP	168944672	32829	75	PD11800b	WXS	CGP	94045645	2519	75	0.0103031	0.0129	0.0105011	0.01397
91	PD11818a	Breast	WGS	CGP	884018857	1359075	100	PD11818b	WGS	CGP	460971864	342700	100	0.00271555	0.00537	0	0
92	PD11819a	Breast	WGS	CGP	766247358	1311457	100	PD11819b	WGS	CGP	421750427	738302	100	0	0	0	0
93	PD12330a	MDS	WXS	CGP	51700039	1367	75	PD12330b	WXS	CGP	63178021	1140	75	0.000990344	0.00236	0.00309897	0.00524
94	PD12337a	Prostate	WGS	CGP	1029699023	1209141	90	PD12337b	WGS	CGP	914747971	1536467	90	0.0227365	0.03111	0.00101317	0.003
95	PD12354a	Colorectal	WXS	CGP	81504238	43637	75	PD12354b	WXS	CGP	75427318	74454	75	0.00673117	0.00942	0.01021	0.01358
97	PD12356a	Colorectal	WXS	CGP	70211248	43813	75	PD12356b	WXS	CGP	97232772	96010	75	0.00373388	0.00594	0.00263887	0.00427
98	PD12357a	Colorectal	WXS	CGP	82672541	59417	75	PD12357b	WXS	CGP	78445947	93726	75	0.00342511	0.00529	0.000886263	0.00189
99	PD12358a	Colorectal	WXS	CGP	83913154	37726	75	PD12358b	WXS	CGP	74058764	36807	75	0.0066468	0.00906	0.00634249	0.00905
100	PD12359a	Colorectal	WXS	CGP	83081295	33882	75	PD12359b	WXS	CGP	67615971	32807	75	0.000919646	0.00182	0	0
101	PD12360a	Colorectal	WXS	CGP	33759623	7830	75	PD12360b	WXS	CGP	86683053	50790	75	0	0	0.00052521	0.00125
102	PD12361a	Colorectal	WXS	CGP	81577011	16050	75	PD12361b	WXS	CGP	69175209	32338	75	0.00125408	0.00235	0.000366032	0.00108
103	PD12362a	Colorectal	WXS	CGP	79842309	59758	75	PD12362b	WXS	CGP	70051450	49098	75	0.00441684	0.00658	0.00382117	0.00619
104	PD12363a	Colorectal	WXS	CGP	32201223	8178	75	PD12363b	WXS	CGP	67757706	19349	75	0.0060698	0.01027	0.00122001	0.0026
105	PD12364a	Colorectal	WXS	CGP	72252434	64151	75	PD12364b	WXS	CGP	61216444	50339	75	0.0185707	0.02341	0.00117751	0.00281
106	PD12366a	Colorectal	WXS	CGP	30309536	5462	75	PD12366b	WXS	CGP	68174449	54104	75	0.0184665	0.02598	0.000412882	0.00122
107	PD12367a	Colorectal	WXS	CGP	70508959	24257	75	PD12367b	WXS	CGP	73910569	27481	75	0.000412882	0.00122	0.00555737	0.0082
108	PD12370a	Osteosarcoma	WXS	CGP	56510096	8998	75	PD12370b	WXS	CGP	54163374	2545	75	0.0150781	0.02064	0.00377477	0.00679
109	PD12430a	Osteosarcoma	WXS	CGP	63599765	13796	75	PD12430b	WXS	CGP	49967943	1336	75	0.00913409	0.01271	0.0135813	0.01749
110	PD12431a	Osteosarcoma	WXS	CGP	88662963	24247	75	PD12431b	WXS	CGP	45793965	10030	75	0	0	0.00189334	0.00403
111	PD12435a	Osteosarcoma	WXS	CGP	81183036	32862	75	PD12435b	WXS	CGP	89583889	87884	75	0.00482343	0.00735	0.00762026	0.01066
112	PD12445a	Osteosarcoma	WXS	CGP	87648741	31323	75	PD12445b	WXS	CGP	83051637	4914	75	0.0103353	0.01349	0.00869313	0.0118
113	PD12446a	Osteosarcoma	WXS	CGP	57234488	34602	75	PD12446b	WXS	CGP	95257343	14307	75	0.00696677	0.01075	0.00211603	0.00381
114	PD12447a	Osteosarcoma	WXS	CGP	105006843	77219	75	PD12447b	WXS	CGP	88958922	6877	75	0.00344645	0.00532	0.00760901	0.01053
115	PD12448a	Osteosarcoma	WXS	CGP	69269356	42381	75	PD12448b	WXS	CGP	50907824	2260	75	0.00464684	0.00752	0.00834492	0.01256
116	PD12449a	Osteosarcoma	WXS	CGP	57969166	16602	75	PD12449b	WXS	CGP	44855906	945	75	0.00406504	0.00688	0.00257981	0.00511
117	PD12453a	Osteosarcoma	WXS	CGP	71531125	30428	75	PD12453b	WXS	CGP	80612820	5086	75	0.00689655	0.00991	0.0105729	0.01397
118	PD12454a	Osteosarcoma	WXS	CGP	55635365	15354	75	PD12454b	WXS	CGP	26775669	1453	75	0.00380389	0.00629	0.0165593	0.02418
119	PD12455a	Osteosarcoma	WXS	CGP	63731446	26322	75	PD12455b	WXS	CGP	79760110	5018	75	0.00840336	0.01131	0.00473827	0.00676
120	PD12456a	Osteosarcoma	WXS	CGP	85268985	37467	75	PD12456b	WXS	CGP	65234267	3892	75	0.0060024	0.00904	0.00402576	0.00652
121	PD12458a	Osteosarcoma	WXS	CGP	105098134	58460	75	PD12458b	WXS	CGP	113411168	6607	75	0.00217895	0.00369	0.00480833	0.00703
122	PD12461a	Osteosarcoma	WXS	CGP	84267932	44806	75	PD12461b	WXS	CGP	64218191	9926	75	0.00177936	0.00352	0.00188147	0.00372
123	PD12462a	Osteosarcoma	WXS	CGP	84697453	20865	75	PD12462b	WXS	CGP	77586203	9085	75	0.00284981	0.00461	0.00151573	0.003
125	PD12807a	Prostate	WGS	CGP	1803045973	3902982	100	PD12807b	WGS	CGP	1340263478	782107	100	0	0	0	0
127	PD12809a	Prostate	WGS	CGP	1956244917	4208576	100	PD12809b	WGS	CGP	1102126075	630760	100	0.00100536	0.00214	0.00219298	0.00434
129	PD12811a	Prostate	WGS	CGP	1978566992	4778693	100	PD12811b	WGS	CGP	1112559817	448975	100	0	0	0.000673401	0.00199
130	PD12812a	Prostate	WGS	CGP	1722733693	4090057	100	PD12812b	WGS	CGP	1307168569	574992	100	0.00180628	0.00358	0	0
131	PD12813a	Prostate	WGS	CGP	2099136104	4120547	100	PD12813b	WGS	CGP	1304308402	622979	100	0	0	0	0
132	PD12814a	Prostate	WGS	CGP	2359063634	3304504	100	PD12814b	WGS	CGP	1362169673	500575	100	0.00154775	0.0029	0	0
133	PD12815a	Prostate	WGS	CGP	1503321030	2699309	100	PD12815b	WGS	CGP	1557496197	456616	100	0.00427807	0.00724	0	0
134	PD12816a	Prostate	WGS	CGP	2297906770	2535193	100	PD12816b	WGS	CGP	1368467417	215412	100	0	0	0	0
135	PD12817a	Prostate	WGS	CGP	2276540186	4055891	100	PD12817b	WGS	CGP	1310613246	490115	100	0	0	0	0
136	PD12818a	Prostate	WGS	CGP	1696048596	2041803	100	PD12818b	WGS	CGP	1270962310	848093	100	0	0	0	0
137	PD12819a	Prostate	WGS	CGP	2359850391	3362035	100	PD12819b	WGS	CGP	1120531963	351716	100	0	0	0	0
138	PD12820a	Prostate	WGS	CGP	1953809515	2643239	100	PD12820b	WGS	CGP	1413402203	810480	100	0.00137033	0.00271	0	0
139	PD12821a	Prostate	WGS	CGP	1615739395	1975767	100	PD12821b	WGS	CGP	1427134185	704307	100	0.00100376	0.00239	0	0
140	PD12822a	Prostate	WGS	CGP	2243388715	3151943	100	PD12822b	WGS	CGP	1237955999	435382	100	0.00185874	0.00349	0	0
141	PD12823a	Prostate	WGS	CGP	1708659722	2688107	100	PD12823b	WGS	CGP	1322682583	639718	100	0	0	0	0
142	PD12824a	Prostate	WGS	CGP	1473179863	2923726	100	PD12824b	WGS	CGP	1174456005	479453	100	0.00152323	0.00363	0.00130208	0.00311
143	PD12825a	Prostate	WGS	CGP	1700634669	2877765	100	PD12825b	WGS	CGP	1193618195	372148	100	0	0	0	0
144	PD12826a	Prostate	WGS	CGP	1747360025	3162128	100	PD12826b	WGS	CGP	1217066258	658501	100	0	0	0	0
145	PD12827a	Prostate	WGS	CGP	1851500518	3070227	100	PD12827b	WGS	CGP	1154095425	548515	100	0	0	0	0
146	PD12828a	Prostate	WGS	CGP	2299899316	4177028	100	PD12828b	WGS	CGP	1107882989	405492	100	0.00386018	0.00638	0	0
147	PD12829a	Prostate	WGS	CGP	2082269222	3539320	100	PD12829b	WGS	CGP	1265534648	466244	100	0	0	0	0
148	PD12830a	Prostate	WGS	CGP	1672771853	2528439	100	PD12830b	WGS	CGP	1347458975	634779	100	0.000404776	0.0012	0	0
150	PD12832a	Prostate	WGS	CGP	2071240593	3065173	100	PD12832b	WGS	CGP	1264934046	595487	100	0	0	0	0
151	PD12834a	Prostate	WGS	CGP	2077340811	3383447	100	PD12834b	WGS	CGP	1155017137	339886	100	0.00257124	0.00463	0	0
152	PD12835a	Prostate	WGS	CGP	1809552147	1944353	100	PD12835b	WGS	CGP	1082350026	285255	100	0.0151515	0.01951	0	0
153	PD12836a	Prostate	WGS	CGP	1697059961	4259480	100	PD12836b	WGS	CGP	1144474302	312818	100	0	0	0	0
154	PD12837a	Prostate	WGS	CGP	1711390483	1895005	100	PD12837b	WGS	CGP	1249632132	315502	100	0	0	0	0
155	PD12838a	Prostate	WGS	CGP	1717637930	3691778	100	PD12838b	WGS	CGP	1299597003	384223	100	0.00244898	0.00441	0	0
156	PD12839a	Prostate	WGS	CGP	1768237499	2007092	100	PD12839b	WGS	CGP	1034655341	351389	100	0	0	0	0
159	PD12844a	Prostate	WGS	CGP	1661293498	3640346	100	PD12844b	WGS	CGP	1151484171	318212	100	0.00796178	0.01198	0	0
160	PD12845a	Prostate	WGS	CGP	1831781839	2461425	100	PD12845b	WGS	CGP	1039590110	284511	100	0	0	0	0
161	PD12846a	Colorectal	WXS	CGP	61611853	14194	75	PD12846b	WXS	CGP	67171384	43474	75	0.00867052	0.01237	0.00855717	0.0125
162	PD12847a	Colorectal	WXS	CGP	69807912	32339	75	PD12847b	WXS	CGP	54505717	35628	75	0.0300944	0.03772	0.00560067	0.00907
163	PD12848a	Colorectal	WXS	CGP	35481130	8844	75	PD12848b	WXS	CGP	55771996	24334	75	0.0111266	0.01656	0.0118719	0.01541
164	PD12849a	Colorectal	WXS	CGP	20173104	5762	75	PD12849b	WXS	CGP	57239885	51968	75	0.0132626	0.02146	0.00510559	0.00812
165	PD12850a	Colorectal	WXS	CGP	75075395	37349	75	PD12850b	WXS	CGP	64028721	18500	75	0.0201496	0.02499	0.00721154	0.01054
166	PD12851a	Colorectal	WXS	CGP	65600839	18526	75	PD12851b	WXS	CGP	60894163	22878	75	0.0091645	0.01244	0.00761974	0.01087
167	PD12853a	Colorectal	WXS	CGP	63917525	25517	75	PD12853b	WXS	CGP	64374046	48988	75	0.00402522	0.00606	0.013103	0.01696
168	PD12854a	Colorectal	WXS	CGP	75585846	35876	75	PD12854b	WXS	CGP	120803581	58853	75	0.0175386	0.02199	0.0110408	0.01366
170	PD13336a	Colorectal	WXS	CGP	72696391	36293	75	PD13336b	WXS	CGP	45754140	4697	75	0.00544617	0.0084	0.00314663	0.0059
173	PD13381a	Prostate	WGS	CGP	1643708884	2384546	100	PD13381b	WGS	CGP	1041982070	335862	100	0.00047619	0.00141	0	0
174	PD13382a	Prostate	WGS	CGP	1437450842	2274102	100	PD13382b	WGS	CGP	1228124068	584813	100	0	0	0	0
175	PD13383a	Prostate	WGS	CGP	1737801705	2582191	100	PD13383b	WGS	CGP	1156107533	303232	100	0	0	0	0
176	PD13384a	Prostate	WGS	CGP	1527686869	2694053	100	PD13384b	WGS	CGP	1154637469	387674	100	0	0	0	0
177	PD13386a	Prostate	WGS	CGP	1712468874	2335042	100	PD13386b	WGS	CGP	1129585587	332066	100	0	0	0	0
178	PD13387a	Prostate	WGS	CGP	1537191522	2052978	100	PD13387b	WGS	CGP	1141250858	437138	100	0	0	0	0
179	PD13388a	Prostate	WGS	CGP	1686397553	2059502	100	PD13388b	WGS	CGP	892734627	254846	100	0	0	0.00265369	0.00565
180	PD13389a	Prostate	WGS	CGP	1468324714	1235094	100	PD13389b	WGS	CGP	902245314	154055	100	0	0	0	0
181	PD13390a	Prostate	WGS	CGP	1525102743	2536800	100	PD13390b	WGS	CGP	1127312323	260618	100	0.000464253	0.00137	0	0
182	PD13391a	Prostate	WGS	CGP	1732948528	3011773	100	PD13391b	WGS	CGP	938133220	146068	100	0	0	0	0
183	PD13392a	Prostate	WGS	CGP	1855129225	2344085	100	PD13392b	WGS	CGP	1117350685	451573	100	0.000382848	0.00113	0	0
184	PD13394a	Prostate	WGS	CGP	1658730242	3073088	100	PD13394b	WGS	CGP	1016610466	207201	100	0	0	0	0
185	PD13395a	Prostate	WGS	CGP	1463569506	2734503	100	PD13395b	WGS	CGP	878615093	199473	100	0	0	0	0
186	PD13396a	Prostate	WGS	CGP	2460165289	4632772	100	PD13396b	WGS	CGP	1563808724	510893	100	0.000517933	0.00124	0	0
187	PD13397a	Prostate	WGS	CGP	1768883091	2353756	100	PD13397b	WGS	CGP	1202624488	430865	100	0.00148176	0.00293	0	0
188	PD13398a	Prostate	WGS	CGP	1716524101	2599643	100	PD13398b	WGS	CGP	997697503	477974	100	0.00113229	0.00241	0	0
189	PD13400a	Prostate	WGS	CGP	1816391592	2153879	100	PD13400b	WGS	CGP	910906498	281958	100	0.0102145	0.01386	0	0
191	PD13402a	Prostate	WGS	CGP	1805431452	3889865	100	PD13402b	WGS	CGP	1139845629	365811	100	0	0	0	0
192	PD13403a	Prostate	WGS	CGP	2824584389	4108266	100	PD13403b	WGS	CGP	955367340	328286	100	0	0	0	0
193	PD13404a	Prostate	WGS	CGP	1804000320	2824652	100	PD13404b	WGS	CGP	1210858935	767625	100	0	0	0	0
194	PD13405a	Prostate	WGS	CGP	1712036533	3775280	100	PD13405b	WGS	CGP	1042112238	382519	100	0	0	0	0
195	PD13406a	Prostate	WGS	CGP	1688660864	3339589	100	PD13406b	WGS	CGP	1176669133	532478	100	0.0025974	0.00452	0	0
196	PD13407a	Prostate	WGS	CGP	1799858737	3354804	100	PD13407b	WGS	CGP	945204811	303529	100	0.00187676	0.00338	0	0
197	PD13408a	Prostate	WGS	CGP	1637744213	5323153	100	PD13408b	WGS	CGP	907149099	508421	100	0.00410584	0.00679	0	0
198	PD13409a	Prostate	WGS	CGP	1514711280	1716769	100	PD13409b	WGS	CGP	934343069	225720	100	0.00149813	0.00319	0	0
199	PD13410a	Prostate	WGS	CGP	3094063916	3666498	100	PD13410b	WGS	CGP	863419768	314852	100	0.000934798	0.00185	0	0
200	PD13411a	Prostate	WGS	CGP	3104116930	3811337	100	PD13411b	WGS	CGP	910409497	495908	100	0.00231723	0.00375	0	0
201	PD13412a	Prostate	WGS	CGP	1676537285	1776107	100	PD13412b	WGS	CGP	877413245	2783568	100	0.0109733	0.01545	0	0
203	PD2126a	Renal	WXS	CGP	73621026	4438	76	PD2126b	WXS	CGP	86764588	69760	76	0.00507078	0.00794	0.00260567	0.00431
204	PD2127a	Renal	WXS	CGP	140699962	21443	76	PD2127b	WXS	CGP	148927992	28797	76	0.00191365	0.00324	0	0
205	PD2144a	Renal	WXS	CGP	65097325	8973	76	PD2144b	WXS	CGP	80674886	17215	76	0.00193517	0.00383	0.00085197	0.00203
206	PD2147a	Renal	WXS	CGP	65812171	51968	76	PD2147b	WXS	CGP	69632169	8846	76	0.00146762	0.00291	0	0
207	PD2155a	Renal	WXS	CGP	108214662	4769	76	PD2155b	WXS	CGP	98881910	19041	76	0.00243494	0.00412	0.00328767	0.00515
208	PD2156a	Renal	WXS	CGP	129056996	963	76	PD2156b	WXS	CGP	104766901	43964	76	0.00298885	0.00461	0.00397011	0.00586
209	PD2158a	Renal	WXS	CGP	133553813	2875	76	PD2158b	WXS	CGP	98107494	68245	76	0.000527357	0.00126	0.00102863	0.00219
210	PD2160a	Renal	WXS	CGP	129951546	2307	76	PD2160b	WXS	CGP	78335280	42872	76	0	0	0	0
211	PD2162a	Renal	WXS	CGP	109960153	1005	76	PD2162b	WXS	CGP	95382069	20880	76	0	0	0	0
212	PD2170a	Renal	WXS	CGP	122209834	2379	76	PD2170b	WXS	CGP	100033708	7733	76	0	0	0	0
213	PD2172a	Renal	WXS	CGP	125157868	1129	76	PD2172b	WXS	CGP	97621492	20679	76	0	0	0	0
214	PD2175a	Renal	WXS	CGP	117847666	2973	76	PD2175b	WXS	CGP	91913277	26603	76	0.000229095	0.00068	0	0
215	PD2176a	Renal	WXS	CGP	140500560	5748	76	PD2176b	WXS	CGP	126280597	25399	76	0	0	0	0
216	PD2184a	Renal	WXS	CGP	136738338	9049	76	PD2184b	WXS	CGP	147228083	272163	76	0.00259312	0.00412	0.00412749	0.00603
217	PD2185a	Renal	WXS	CGP	75414309	5296	76	PD2185b	WXS	CGP	80192341	13255	76	0	0	0	0
218	PD2192a	Renal	WXS	CGP	135201038	2821	76	PD2192b	WXS	CGP	139539400	10004	76	0	0	0.0039285	0.00565
219	PD2202a	Renal	WXS	CGP	145259318	881	76	PD2202b	WXS	CGP	122092524	24870	76	0	0	0	0
220	PD2208a	Renal	WXS	CGP	129194691	4714	76	PD2208b	WXS	CGP	137374842	43503	76	0	0	0	0
221	PD2213a	Renal	WXS	CGP	125651253	969	76	PD2213b	WXS	CGP	139763619	10179	76	0	0	0	0
222	PD2216a	Renal	WXS	CGP	96182755	1546	76	PD2216b	WXS	CGP	147825645	15222	76	0.00438314	0.00646	0.00246219	0.00375
223	PD3178a	Adenoid cystic ca.	WXS	CGP	83744953	19529	76	PD3178b	WXS	CGP	92483445	23175	76	0	0	0	0
224	PD3179a	Adenoid cystic ca.	WXS	CGP	83496574	34534	76	PD3179b	WXS	CGP	101324979	24220	76	0	0	0	0
225	PD3180a	Adenoid cystic ca.	WXS	CGP	94472823	29709	76	PD3180b	WXS	CGP	93751406	13183	76	0.00503282	0.00709	0.00365297	0.00556
226	PD3181a	Adenoid cystic ca.	WXS	CGP	78774655	21348	76	PD3181b	WXS	CGP	97106748	27332	76	0.00126582	0.00251	0.00137231	0.00257
227	PD3182a	Adenoid cystic ca.	WXS	CGP	84203664	24234	76	PD3182b	WXS	CGP	83950344	21308	76	0	0	0.00186393	0.00324
228	PD3183a	Adenoid cystic ca.	WXS	CGP	43064113	12778	76	PD3183b	WXS	CGP	85019992	26712	76	0	0	0.022014	0.027
229	PD3184a	Adenoid cystic ca.	WXS	CGP	85089231	16226	76	PD3184b	WXS	CGP	84289800	16046	76	0	0	0	0
230	PD3185a	Adenoid cystic ca.	WXS	CGP	84171277	28906	76	PD3185b	WXS	CGP	69391506	37262	76	0	0	0	0
231	PD3186a	Adenoid cystic ca.	WXS	CGP	123966188	19046	76	PD3186b	WXS	CGP	69276583	67190	76	0	0	0	0
232	PD3187a	Adenoid cystic ca.	WXS	CGP	79337975	22114	76	PD3187b	WXS	CGP	73469895	17403	76	0	0	0	0
233	PD3188a	Adenoid cystic ca.	WXS	CGP	77713057	15320	76	PD3188b	WXS	CGP	90834927	32399	76	0	0	0	0
234	PD3189a	Adenoid cystic ca.	WXS	CGP	57015606	16956	76	PD3189b	WXS	CGP	95764491	15072	76	0.00543331	0.0088	0	0
235	PD3190a	Adenoid cystic ca.	WXS	CGP	70593685	12665	76	PD3190b	WXS	CGP	92851666	90741	76	0.000313234	0.00093	0	0
236	PD3191a	Adenoid cystic ca.	WXS	CGP	67605087	20045	76	PD3191b	WXS	CGP	93446295	30397	76	0.00641411	0.00955	0	0
237	PD3192a	Adenoid cystic ca.	WXS	CGP	62472949	11793	76	PD3192b	WXS	CGP	87959108	7629	76	0	0	0	0
238	PD3193a	Adenoid cystic ca.	WGS	CGP	208361049	320044	37	PD3193b	WXS	CGP	88247926	74248	76	0	0	0	0
239	PD3194a	Adenoid cystic ca.	WXS	CGP	73583198	11012	76	PD3194b	WXS	CGP	81287524	49170	76	0.00173385	0.00312	0.00230017	0.00389
240	PD3195a	Adenoid cystic ca.	WXS	CGP	81266419	10286	76	PD3195b	WXS	CGP	84764825	24278	76	0	0	0	0
241	PD3196a	Adenoid cystic ca.	WXS	CGP	62331873	9561	76	PD3196b	WXS	CGP	90801899	28769	76	0	0	0	0
242	PD3197a	Adenoid cystic ca.	WXS	CGP	36229519	16009	76	PD3197b	WXS	CGP	92005735	28754	76	0	0	0.000343702	0.00102
243	PD3198a	Adenoid cystic ca.	WXS	CGP	42311823	10591	76	PD3198b	WXS	CGP	77945314	25951	76	0.000602954	0.00178	0.00218023	0.00392
244	PD3199a	Adenoid cystic ca.	WXS	CGP	65616984	12022	76	PD3199b	WXS	CGP	72483887	69593	76	0.00180587	0.00357	0	0
245	PD3200a	Adenoid cystic ca.	WXS	CGP	78527924	13964	76	PD3200b	WXS	CGP	82526507	80520	76	0.0011236	0.00222	0	0
246	PD3208a	Adenoid cystic ca.	WXS	CGP	71145002	12863	76	PD3208b	WXS	CGP	88882283	55794	76	0.00123686	0.00245	0	0
247	PD3216a	Adenoid cystic ca.	WXS	CGP	77483924	7638	76	PD3216b	WXS	CGP	76456100	35582	76	0.000879507	0.00187	0	0
248	PD3226a	Adenoid cystic ca.	WXS	CGP	73504938	10273	76	PD3226b	WXS	CGP	81321916	30722	76	0	0	0	0
249	PD3295a	Renal	WXS	CGP	62638775	3016	76	PD3295b	WXS	CGP	84847265	7658	76	0	0	0.00328475	0.00556
250	PD3412a	Renal	WXS	CGP	55200610	15753	76	PD3412b	WXS	CGP	59517992	1819	76	0	0	0.00157233	0.00335
252	PD3714a	Breast	WGS	CGP	1036642568	1408328	37-108	PD3714b	WGS	CGP	1127018949	767007	76-108	0.010582	0.01712	0.00257511	0.00549
253	PD3786a	Chordoma	WGS	CGP	181506904	419970	37	PD3786b	WXS	CGP	79822093	63543	76	0	0	0.00335383	0.00554
254	PD3789a	Osteosarcoma	WXS	CGP	110549728	10369	75	PD3789b	WXS	CGP	91943696	95065	75	0.00897219	0.01159	0.00464336	0.00679
255	PD3790a	Chordoma	WGS	CGP	206639814	421879	37	PD3790b	WXS	CGP	96790904	113052	76	0	0	0.00619612	0.00872
256	PD3791a	Chordoma	WGS	CGP	202397872	362159	37	PD3791b	WXS	CGP	84631743	77710	76	-1	-1	0.00110457	0.00235
258	PD3793a	Osteosarcoma	WXS	CGP	64560433	10606	76	PD3793b	WXS	CGP	85462317	80307	76	0.00113379	0.0027	0.00472915	0.00752
260	PD3796a	Osteosarcoma	WXS	CGP	115359174	17130	75	PD3796b	WXS	CGP	84394565	83102	75	0.00648012	0.00869	0.0115527	0.01504
261	PD3797a	Osteosarcoma	WGS	CGP	209159293	149930	37	PD3797b	WXS	CGP	91955815	8632	76	0	0	0.0021969	0.00372
262	PD3799a	Chordoma	WGS	CGP	105343954	279543	37	PD3799b	WXS	CGP	52610804	69874	74-76	-1	-1	0	0
264	PD3804a	Chordoma	WGS	CGP	162381461	347097	37	PD3804b	WXS	CGP	78326968	75935	76	0	0	0	0
265	PD3806a	Osteosarcoma	WGS	CGP	146197867	325438	50	PD3806b	WXS	CGP	77542674	17312	75	-1	-1	0.0014273	0.00283
266	PD3807a	Chordoma	WGS	CGP	178969758	482391	37	PD3807b	WXS	CGP	95409584	136457	75	0	0	0.00352671	0.00571
267	PD3808a	Chordoma	WGS	CGP	75188793	368139	37	PD3808b	WXS	CGP	91862459	106596	75	0	0	0.00346021	0.0056
268	PD3812a	Chordoma	WGS	CGP	246613483	581409	37	PD3812b	WXS	CGP	91049217	30010	75	0.0217391	0.06412	0	0
269	PD3814a	Chordoma	WGS	CGP	139107796	239665	37	PD3814b	WXS	CGP	95186306	112156	75	-1	-1	0	0
270	PD3815a	Chordoma	WGS	CGP	148583598	649664	37	PD3815b	WXS	CGP	90138226	80841	75	-1	-1	0.00402982	0.00653
272	PD3819a	Chordoma	WGS	CGP	161286675	511460	37	PD3819b	WXS	CGP	84772014	104186	75	-1	-1	0.00527851	0.00765
273	PD3820a	Chordoma	WGS	CGP	182902824	430073	37	PD3820b	WXS	CGP	58348005	89620	76	-1	-1	0.000373972	0.00111
274	PD3821a	Chordoma	WGS	CGP	155571328	222907	37	PD3821b	WXS	CGP	65455579	42537	76	-1	-1	0.000481116	0.00142
275	PD3849a	Breast	WXS	CGP	80777910	2635	76	PD3849b	WXS	CGP	119989263	1177	76	0.00215556	0.00388	0	0
276	PD3851a	Breast	WGS	CGP	1127946740	2363828	76-100	PD3851b	WGS	CGP	1141900271	525742	76-100	0	0	0.00255885	0.0048
277	PD3852a	Breast	WXS	CGP	65377476	8890	76	PD3852b	WXS	CGP	53646352	1268	76	0.0057971	0.00894	0.00731835	0.01044
278	PD3853a	Breast	WXS	CGP	68767374	2715	76	PD3853b	WXS	CGP	61626721	651	76	0	0	0.00169109	0.0036
279	PD3854a	Breast	WXS	CGP	66245244	8348	76	PD3854b	WXS	CGP	54710712	515	76	0.00583942	0.00945	0	0
280	PD3856a	Breast	WXS	CGP	51835761	10330	76	PD3856b	WXS	CGP	59912316	425	76	0.0129488	0.01834	0	0
281	PD3857a	Breast	WXS	CGP	98642205	2517	76	PD3857b	WXS	CGP	68982722	580	76	0.00418364	0.00606	0	0
282	PD3858a	Breast	WXS	CGP	80704797	5877	76	PD3858b	WXS	CGP	75396092	488	76	0.00295671	0.00515	0	0
283	PD3861a	Osteosarcoma	WXS	CGP	145412952	17877	75	PD3861b	WXS	CGP	114231141	64028	75	0.0131166	0.01576	0.0134069	0.01658
284	PD3862a	Osteosarcoma	WXS	CGP	145223780	46068	75	PD3862b	WXS	CGP	130741727	254462	75	0.0200755	0.02397	0.0672095	0.07477
285	PD3890a	Breast	WGS	CGP	1072643514	1786940	100	PD3890b	WGS	CGP	992153196	409386	100	0	0	0.00200803	0.00479
286	PD3904a	Breast	WGS	CGP	1378599344	2669954	100-108	PD3904b	WGS	CGP	1090696758	863371	100	0.00466786	0.0072	0	0
287	PD3905a	Breast	WGS	CGP	1034577263	1407513	100	PD3905b	WGS	CGP	898441538	1807594	100-108	0.00297265	0.00558	0	0
288	PD3916a	CLL	WGS	CGP	1397850911	1211142	76-108	PD3916b	WGS	CGP	1110212885	770430	76-108	0	0	0	0
289	PD3917a	CLL	WGS	CGP	1356101575	1020554	76-108	PD3917b	WGS	CGP	824596002	517456	76-108	0	0	0	0
290	PD3918a	CLL	WGS	CGP	824740487	616220	76-108	PD3918b	WGS	CGP	1485931000	1219274	76-108	0	0	0	0
291	PD3945a	Breast	WGS	CGP	871323410	1327765	100-108	PD3945b	WGS	CGP	950673989	456457	100-108	0	0	0	0
292	PD3952a	ALL	WGS	CGP	317509419	220835	50	PD3952b	WXS	CGP	77009083	2938	76	0	0	0	0
293	PD3953a	ALL	WGS	CGP	421758308	211136	50	PD3953b	WXS	CGP	75542349	3913	76	0	0	0	0
294	PD3954a	ALL	WGS	CGP	421329823	200065	50	PD3954b	WXS	CGP	30235225	3676	76	0	0	0.0157993	0.02328
295	PD3955a	ALL	WGS	CGP	67548566	84554	37	PD3955b	WXS	CGP	53305508	3233	76	-1	-1	0	0
296	PD3956a	ALL	WGS	CGP	209121054	141574	37	PD3956b	WXS	CGP	24494957	1775	76	-1	-1	0.00105042	0.00311
297	PD3957a	ALL	WGS	CGP	430957363	313557	50	PD3957b	WXS	CGP	49334242	5003	76	0	0	0.00701139	0.01097
298	PD3958a	ALL	WGS	CGP	426427373	297194	50	PD3958b	WXS	CGP	56184587	3589	76	0	0	0.000448229	0.00133
299	PD3959a	ALL	WGS	CGP	312692196	171516	37	PD3959b	WXS	CGP	42523843	2766	76	-1	-1	0.0063234	0.00963
300	PD3960a	ALL	WGS	CGP	505443578	290521	50	PD3960b	WXS	CGP	46639989	4415	76	0	0	0.00230415	0.00456
301	PD3961a	ALL	WGS	CGP	236330237	121458	50	PD3961b	WXS	CGP	36452923	2783	76	-1	-1	0	0
302	PD3962a	ALL	WGS	CGP	235700356	172734	37	PD3962b	WXS	CGP	92584698	7160	76	-1	-1	0.00057554	0.00137
303	PD3963a	ALL	WGS	CGP	363977884	201750	37	PD3963b	WXS	CGP	123122758	6135	76	0	0	0.00280533	0.00427
304	PD3964a	ALL	WGS	CGP	269914945	182757	37	PD3964b	WXS	CGP	56798447	4890	76	-1	-1	0.00458115	0.00797
305	PD3965a	ALL	WGS	CGP	318036810	170645	37	PD3965b	WXS	CGP	81560595	5043	76	-1	-1	0	0
306	PD3966a	ALL	WGS	CGP	352356801	307848	50	PD3966b	WXS	CGP	107229663	7345	76	0.0144928	0.0428	0	0
307	PD3967a	ALL	WXS	CGP	40032915	3649	76	PD3967b	WXS	CGP	104646036	4822	76	0.000751597	0.00222	0	0
308	PD3968a	ALL	WGS	CGP	199098645	119201	37	PD3968b	WXS	CGP	85691165	5946	76	-1	-1	0.00277248	0.00469
309	PD3969a	ALL	WGS	CGP	284992344	186982	50	PD3969b	WXS	CGP	91392201	5015	76	0	0	0.00569106	0.00867
310	PD3970a	ALL	WXS	CGP	36884121	4108	76	PD3970b	WXS	CGP	82971816	4511	76	0	0	0.00167119	0.00331
311	PD3971a	ALL	WGS	CGP	234710638	163853	50	PD3971b	WXS	CGP	75317254	5456	76	0	0	0.00690113	0.00955
312	PD3972a	ALL	WXS	CGP	113675786	6388	76	PD3972b	WXS	CGP	94877567	2686	76	0	0	0	0
313	PD3973a	ALL	WGS	CGP	278959343	92293	50	PD3973b	WXS	CGP	87014022	2731	76	0	0	0.000326477	0.00097
314	PD3974a	ALL	WXS	CGP	80532394	6984	76	PD3974b	WXS	CGP	85239254	5761	76	0	0	0	0
315	PD3975a	ALL	WXS	CGP	78555117	6156	76	PD3975b	WXS	CGP	96989906	1794	76	0	0	0	0
316	PD3976a	ALL	WGS	CGP	323388952	43462	50	PD3976b	WXS	CGP	83303966	1671	76	0	0	0	0
317	PD3977a	ALL	WGS	CGP	226794510	136956	37	PD3977b	WXS	CGP	91322220	1493	76	-1	-1	0.00380228	0.00587
318	PD3978a	ALL	WGS	CGP	147446278	91799	37	PD3978b	WXS	CGP	82289959	2007	76	-1	-1	0	0
319	PD3983a	Breast	WXS	CGP	94260292	6017	76	PD3983b	WXS	CGP	86092481	3253	76	0	0	0	0
321	PD3985a	Breast	WXS	CGP	85086460	4602	76	PD3985b	WXS	CGP	125162732	3439	76	0.000694806	0.00166	0	0
322	PD3986a	Breast	WXS	CGP	87571692	4162	76	PD3986b	WXS	CGP	96993516	1952	76	0.0272657	0.03292	0.00251934	0.00438
323	PD3987a	Breast	WXS	CGP	87459198	13697	76	PD3987b	WXS	CGP	111508100	3807	76	0.00592644	0.00874	0	0
324	PD3988a	Breast	WXS	CGP	153225651	21687	76	PD3988b	WXS	CGP	83836507	2153	76	0.00597055	0.00773	0.00119814	0.00237
325	PD3989a	Breast	WGS	CGP	1256562884	1960696	100	PD3989b	WGS	CGP	989962206	894604	100	0	0	0	0
326	PD3990a	Breast	WXS	CGP	41930219	12963	76	PD3990b	WXS	CGP	25208507	966	76	0.00618429	0.01001	0	0
327	PD3991a	Breast	WXS	CGP	80465757	3515	76	PD3991b	WXS	CGP	79570118	3476	76	0	0	0	0
328	PD3992a	Breast	WXS	CGP	120215148	5234	76	PD3992b	WXS	CGP	95374661	2555	76	0	0	0	0
329	PD3993a	Breast	WXS	CGP	112641841	4586	76	PD3993b	WXS	CGP	76018661	4763	76	0	0	0	0
330	PD3994a	Breast	WXS	CGP	85179492	4398	76	PD3994b	WXS	CGP	86499540	4367	76	0.00183192	0.00363	0	0
331	PD3995a	Breast	WXS	CGP	66953469	3261	76	PD3995b	WXS	CGP	89048861	2700	76	0	0	0	0
332	PD3996a	Breast	WXS	CGP	74594317	4552	76	PD3996b	WXS	CGP	96141278	4098	76	0.000804667	0.00192	0	0
333	PD3997a	Breast	WXS	CGP	66592449	3845	76	PD3997b	WXS	CGP	59032835	1827	76	0	0	0	0
334	PD3998a	Breast	WXS	CGP	69953409	5887	76	PD3998b	WXS	CGP	76947122	1807	76	0	0	0.000849979	0.00203
335	PD3999a	Breast	WXS	CGP	87880710	4928	76	PD3999b	WGS	CGP	979033469	846506	100	0	0	0	0
336	PD4000a	Breast	WXS	CGP	90227582	2896	76	PD4000b	WXS	CGP	100950741	1745	76	0.00114646	0.00227	0.00188248	0.00328
337	PD4001a	Breast	WXS	CGP	66000885	3363	76	PD4001b	WXS	CGP	90383214	2831	76	0.00215015	0.00387	0	0
339	PD4003a	Breast	WXS	CGP	73095786	1641	76	PD4003b	WXS	CGP	85689896	8503	76	0	0	0.0119824	0.016
340	PD4004a	Breast	WXS	CGP	62198430	2767	76	PD4004b	WXS	CGP	103738044	2273	76	0.0004662	0.00138	0	0
341	PD4005a	Breast	WGS	CGP	1184024628	3731373	101	PD4005b	WGS	CGP	1177188522	525155	101	0.00263043	0.00561	0	0
342	PD4006a	Breast	WGS	CGP	944523072	2824019	100-108	PD4006b	WGS	CGP	892956483	390789	100-108	0.0205993	0.02916	0	0
343	PD4007a	MPD	WGS	CGP	1089982931	230467	76-108	PD4007b	WGS	CGP	960513061	226562	76-108	0	0	0	0
344	PD4008a	ALL	WGS	CGP	177282364	172662	50	PD4008b	WXS	CGP	106333788	11193	76	-1	-1	0	0
345	PD4009a	ALL	WGS	CGP	246669040	176973	50	PD4009b	WXS	CGP	68207630	5651	76	0	0	0.000299088	0.00089
346	PD4010a	ALL	WGS	CGP	305286636	213054	50	PD4010b	WXS	CGP	68987374	5959	76	-1	-1	0.00119119	0.00236
347	PD4011a	ALL	WGS	CGP	178166605	194076	50	PD4011b	WXS	CGP	61348491	8872	76	-1	-1	0	0
348	PD4012a	ALL	WGS	CGP	478770743	367806	50	PD4012b	WXS	CGP	84343654	7938	76	0	0	0	0
349	PD4013a	ALL	WGS	CGP	251514669	256238	50	PD4013b	WXS	CGP	84472598	9464	76	0	0	0	0
350	PD4014a	ALL	WGS	CGP	302072046	499275	50	PD4014b	WXS	CGP	86152444	7435	76	-1	-1	0	0
351	PD4015a	ALL	WGS	CGP	231034235	139209	50	PD4015b	WXS	CGP	82261506	9597	76	-1	-1	0.000680272	0.00162
352	PD4016a	ALL	WGS	CGP	348214792	242758	50	PD4016b	WXS	CGP	81723439	6515	76	0	0	0.00288684	0.00467
353	PD4017a	ALL	WGS	CGP	245821312	207588	50	PD4017b	WXS	CGP	95486302	4827	76	0	0	0	0
354	PD4018a	ALL	WGS	CGP	298820934	365599	50	PD4018b	WXS	CGP	101673094	8408	76	0	0	0.00223432	0.00378
355	PD4019a	ALL	WGS	CGP	184969199	120702	50	PD4019b	WXS	CGP	100564651	4350	76	-1	-1	0.00071908	0.00153
356	PD4020a	ALL	WGS	CGP	1656304864	1315334	50-100	PD4020b	WGS	CGP	1162538594	764211	100	0.00112771	0.00269	0	0
357	PD4021a	ALL	WGS	CGP	197557093	136522	50	PD4021b	WXS	CGP	121806425	9754	76	0	0	0.000161538	0.00048
358	PD4022a	ALL	WGS	CGP	230561065	395136	50	PD4022b	WXS	CGP	103494309	14598	76	-1	-1	0	0
359	PD4023a	ALL	WGS	CGP	211140453	202772	50	PD4023b	WXS	CGP	113996686	6245	76	-1	-1	0.00667344	0.0094
360	PD4024a	ALL	WGS	CGP	217140216	178631	50	PD4024b	WXS	CGP	117707758	1877	76	-1	-1	0	0
361	PD4025a	ALL	WGS	CGP	393288174	295939	50	PD4025b	WXS	CGP	108354126	5351	76	0	0	0	0
362	PD4026a	ALL	WGS	CGP	285354846	359298	50	PD4026b	WXS	CGP	111715056	3216	76	0	0	0	0
363	PD4027a	ALL	WGS	CGP	125673430	73044	50	PD4027b	WXS	CGP	111884918	3583	76	-1	-1	0	0
364	PD4028a	ALL	WGS	CGP	205996287	253834	50	PD4028b	WXS	CGP	129386445	1980	76	0	0	0.00271177	0.00393
366	PD4030a	ALL	WGS	CGP	212044347	318881	50	PD4030b	WXS	CGP	63928913	1052	76	0	0	0	0
367	PD4031a	ALL	WGS	CGP	146129467	164837	50	PD4031b	WXS	CGP	86408059	1736	76	-1	-1	0	0
369	PD4033a	ALL	WGS	CGP	482960047	433692	50	PD4033b	WXS	CGP	108771126	2772	76	0	0	0.00378512	0.00584
370	PD4034a	ALL	WGS	CGP	416759020	356646	50	PD4034b	WXS	CGP	105185217	1720	76	0	0	0.000450755	0.00108
371	PD4035a	ALL	WGS	CGP	378742863	316841	50	PD4035b	WXS	CGP	100499218	2087	76	0	0	0.000565025	0.0012
372	PD4036a	ALL	WGS	CGP	423364365	499049	50	PD4036b	WXS	CGP	100299504	1956	76	0	0	0.00266773	0.00432
373	PD4037a	ALL	WGS	CGP	445468284	305016	50	PD4037b	WXS	CGP	105115862	1681	76	0	0	0.00238415	0.00404
374	PD4038a	ALL	WGS	CGP	634655304	638516	50	PD4038b	WXS	CGP	102386904	3033	76	0.00383142	0.01133	0.0018276	0.00329
375	PD4039a	ALL	WGS	CGP	437994944	415213	50	PD4039b	WXS	CGP	93611988	1423	76	0	0	0.0023984	0.00396
377	PD4060a	MPD	WXS	CGP	98528345	544	76	PD4060b	WXS	CGP	90116714	16333	75	0	0	0.087682	0.09795
378	PD4063a	MPD	WXS	CGP	78080325	545	76	PD4063b	WXS	CGP	106292380	1526	76	0	0	0	0
379	PD4069a	Breast	WGS	CGP	1313333548	2493276	100	PD4069b	WGS	CGP	1076787969	444399	100	0.000656383	0.00194	0	0
380	PD4070a	Breast	WXS	CGP	66861230	33001	76	PD4070b	WXS	CGP	107676412	1479	76	0	0	0.00338811	0.00549
381	PD4072a	Breast	WGS	CGP	1391399106	3600393	100	PD4072b	WGS	CGP	1081096439	506856	100	0	0	0	0
383	PD4076a	Breast	WGS	CGP	149041917	1127366	100	PD4076b	WGS	CGP	166638281	97889	100	0	0	0	0
384	PD4080a	Breast	WGS	CGP	1395577202	3161960	100	PD4080b	WGS	CGP	919965734	474687	100	0.00539265	0.00912	0	0
385	PD4082a	Breast	WXS	CGP	28482992	1193	76	PD4082b	WXS	CGP	71066009	6172	76	0.0101339	0.01543	0.000367918	0.00109
386	PD4084a	Breast	WXS	CGP	112143133	2866	54-76	PD4084b	WXS	CGP	119283761	2678	76	0.000830996	0.00165	0.000164813	0.00049
387	PD4085a	Breast	WGS	CGP	1007297330	1328224	100-108	PD4085b	WGS	CGP	1149016649	700623	108	0	0	0	0
388	PD4086a	Breast	WGS	CGP	930730060	1077418	108	PD4086b	WGS	CGP	999766361	1262525	108	0.00319659	0.00681	0	0
389	PD4087a	Breast	WXS	CGP	80051740	3011	76	PD4087b	WXS	CGP	124447422	4844	76	0.000814996	0.00174	0	0
390	PD4088a	Breast	WGS	CGP	908191399	1480727	108	PD4088b	WGS	CGP	1160987166	917921	108	0.0064433	0.01208	0	0
400	PD4103a	Breast	WGS	CGP	1239877605	2280008	100-108	PD4103b	WGS	CGP	1271081718	539625	108	0.00345423	0.00648	0	0
401	PD4104a	Breast	WXS	CGP	141199430	15542	76	PD4104b	WXS	CGP	107517851	3381	76	0.000947194	0.0017	0.00114679	0.00215
402	PD4105a	Breast	WXS	CGP	97205409	10989	76	PD4105b	WXS	CGP	97014831	2565	76	0.000228624	0.00068	0	0
403	PD4106a	Breast	WXS	CGP	85393679	21080	76	PD4106b	WXS	CGP	93336015	2279	76	0.000603136	0.00144	0	0
404	PD4107a	Breast	WGS	CGP	1301913206	4681318	108	PD4107b	WGS	CGP	1028880545	900666	108	0.00259656	0.00514	0	0
405	PD4108a	Breast	WXS	CGP	87282093	7453	76	PD4108b	WXS	CGP	126634947	6751	76	0	0	0.00109509	0.00233
406	PD4109a	Breast	WGS	CGP	1115817192	2174487	108	PD4109b	WGS	CGP	1190799332	1298143	108	0.000936768	0.00277	0	0
407	PD4110a	Breast	WXS	CGP	254990021	37814	76	PD4110b	WXS	CGP	229340919	25307	76	0.00431164	0.00572	0.00454094	0.00611
408	PD4111a	Breast	WXS	CGP	107042967	7159	76	PD4111b	WXS	CGP	102968920	8098	76	0	0	0	0
409	PD4112a	Breast	WXS	CGP	134558516	5723	76	PD4112b	WXS	CGP	107732848	8734	76	0.00224003	0.00346	0.00228542	0.00378
410	PD4113a	Breast	WXS	CGP	152312891	8667	76	PD4113b	WXS	CGP	157723791	15827	76	0.00354308	0.00493	0.00479534	0.00657
411	PD4115a	Breast	WGS	CGP	1082523530	2888942	108	PD4115b	WGS	CGP	1136395148	435568	108	0.00174596	0.00416	0	0
412	PD4116a	Breast	WGS	CGP	895158823	2360189	100	PD4116b	WGS	CGP	1004781946	676466	100	0.0148554	0.02151	0	0
413	PD4118a	Breast	WXS	CGP	108293550	8743	76	PD4118b	WXS	CGP	82300839	1225	76	0.00532896	0.00737	0	0
414	PD4119a	Breast	WXS	CGP	99420913	6232	76	PD4119b	WXS	CGP	78430740	1516	76	0.00515947	0.00731	0.00678175	0.00961
415	PD4120a	Breast	WGS	CGP	5689117288	5871232	101	PD4120b	WGS	CGP	1067386948	475671	101	0	0	0.00130208	0.00311
416	PD4121a	Breast	WXS	CGP	95698794	5059	76	PD4121b	WXS	CGP	81295452	1763	76	0.00471281	0.00702	0.00221935	0.00399
417	PD4122a	Breast	WXS	CGP	94261949	7428	76	PD4122b	WXS	CGP	79659159	1263	76	0.000822481	0.00175	0	0
418	PD4123a	Breast	WXS	CGP	92713481	3807	76	PD4123b	WXS	CGP	87518769	911	76	0.00814721	0.01111	0.00318103	0.00506
419	PD4124a	Breast	WXS	CGP	91483058	8704	76	PD4124b	WXS	CGP	82975590	915	76	0.000649562	0.00155	0	0
420	PD4125a	Breast	WXS	CGP	82293147	3785	76	PD4125b	WXS	CGP	81412439	951	76	0.00269278	0.00428	0.000966417	0.00191
421	PD4126a	Breast	WXS	CGP	116445229	6628	76	PD4126b	WXS	CGP	86250259	1205	76	0.00254588	0.00399	0.00388466	0.00599
422	PD4127a	Breast	WXS	CGP	111642069	4318	76	PD4127b	WXS	CGP	76314653	871	76	0.056705	0.06406	0.00292344	0.00495
423	PD4128a	Breast	WXS	CGP	114467141	5641	76	PD4128b	WXS	CGP	82445672	1094	76	0	0	0	0
424	PD4129a	Breast	WXS	CGP	126964918	3322	76	PD4129b	WXS	CGP	64298778	1350	76	0.00176386	0.00299	0	0
425	PD4130a	Breast	WXS	CGP	97314026	1837	76	PD4130b	WXS	CGP	63200624	1028	76	0.00246116	0.00417	0.00221582	0.00416
426	PD4131a	Breast	WXS	CGP	96358869	3730	76	PD4131b	WXS	CGP	66703413	1571	76	0.000998004	0.00213	0	0
427	PD4132a	Breast	WXS	CGP	96582170	2115	76	PD4132b	WXS	CGP	69364184	1714	76	0	0	0.00043592	0.00129
428	PD4133a	Breast	WXS	CGP	93658134	2198	76	PD4133b	WXS	CGP	74541149	1671	76	0.011554	0.01512	0	0
429	PD4134a	Breast	WXS	CGP	105253760	3083	76	PD4134b	WXS	CGP	72365425	1190	76	0.011462	0.0148	0.000370508	0.0011
430	PD4135a	Breast	WXS	CGP	98750077	3854	76	PD4135b	WXS	CGP	72385526	2436	76	0.00293163	0.00447	0.00319026	0.00507
431	PD4136a	Breast	WXS	CGP	80416804	3804	76	PD4136b	WXS	CGP	70504159	2492	76	0	0	0	0
432	PD4137a	Breast	WXS	CGP	97252632	5396	76	PD4137b	WXS	CGP	72657098	3419	76	0.00118256	0.00234	0.00187477	0.00352
433	PD4183a	Chordoma	WXS	CGP	78709810	9035	76	PD4183b	WXS	CGP	56115024	2562	76	0	0	0.00840999	0.01252
435	PD4187a	Chordoma	WXS	CGP	79371171	19712	76	PD4187b	WXS	CGP	76727617	84564	76	0.00135759	0.00255	0.00348819	0.00555
436	PD4188a	Chordoma	WXS	CGP	80157298	13038	76	PD4188b	WXS	CGP	51142204	44258	76	0.00220264	0.00383	0.00252589	0.00474
437	PD4190a	CLL	WGS	CGP	1233414574	1321040	76-120	PD4190b	WGS	CGP	1228425584	556919	76-120	0.0133511	0.0216	0.0259587	0.03674
439	PD4194a	Breast	WGS	CGP	791607248	2373198	108	PD4194b	WGS	CGP	897136432	155292	108	0.00672495	0.01089	0	0
440	PD4195a	Breast	WXS	CGP	78832080	21499	76	PD4195b	WXS	CGP	92952188	2556	76	0.00456621	0.00715	0.00302064	0.00499
441	PD4196a	Breast	WXS	CGP	69977495	26264	76	PD4196b	WXS	CGP	73479703	2270	76	0.00714982	0.01013	0.000292141	0.00086
442	PD4197a	Breast	WXS	CGP	72723225	3008	76	PD4197b	WXS	CGP	80230872	539	76	0	0	0	0
443	PD4198a	Breast	WGS	CGP	902170692	1365363	100-108	PD4198b	WGS	CGP	1084736571	139795	100-108	0	0	0	0
444	PD4199a	Breast	WGS	CGP	876811513	1378356	100-108	PD4199b	WGS	CGP	983361293	117185	100-108	0.0139442	0.01989	0	0
445	PD4200a	Breast	WXS	CGP	69444873	7209	76	PD4200b	WXS	CGP	75615714	356	76	0	0	0	0
446	PD4201a	Breast	WXS	CGP	86043410	15018	75	PD4201b	WXS	CGP	85193950	12673	75	0.00108814	0.00232	0.00156709	0.0031
447	PD4202a	Breast	WXS	CGP	79645512	9255	75	PD4202b	WXS	CGP	89377488	15508	75	0.00686548	0.01022	0.00659945	0.00964
448	PD4203a	Breast	WXS	CGP	90562666	7679	75	PD4203b	WXS	CGP	98464119	26042	75	0	0	0	0
449	PD4204a	Breast	WXS	CGP	88560936	16296	75	PD4204b	WXS	CGP	71182243	13329	75	0	0	0	0
450	PD4205a	Breast	WXS	CGP	88000294	13400	75	PD4205b	WXS	CGP	73594733	10108	75	0.00429053	0.00654	0.0751992	0.08697
451	PD4224a	Breast	WGS	CGP	945855405	1971879	100	PD4224b	WGS	CGP	965961074	346909	100	0	0	0	0
452	PD4225a	Breast	WGS	CGP	1364223693	4058420	100	PD4225b	WGS	CGP	900587647	294341	100	0.00348129	0.00626	0	0
453	PD4226a	Breast	WXS	CGP	137801393	39996	76	PD4226b	WXS	CGP	119914295	5034	76	0.0024664	0.00399	0.00157212	0.00283
455	PD4248a	Breast	WGS	CGP	1213140335	2470797	100	PD4248b	WGS	CGP	1113253670	417749	100	0	0	0	0
456	PD4252a	Breast	WGS	CGP	2520617413	4785545	100	PD4252b	WGS	CGP	947441929	459662	100	0	0	0.00404313	0.00728
457	PD4255a	Breast	WGS	CGP	1254220357	2067965	100	PD4255b	WGS	CGP	950092729	431756	100	0	0	0	0
458	PD4261a	Breast	WGS	CGP	1286137898	2124606	100	PD4261b	WGS	CGP	1343556257	764921	100	0.00263331	0.00521	0	0
459	PD4264a	Breast	WGS	CGP	881329811	2098475	100	PD4264b	WGS	CGP	866663213	1254370	100	0	0	0	0
460	PD4266a	Breast	WGS	CGP	2002122857	2181442	100	PD4266b	WGS	CGP	1027824056	1376774	100	0.0068921	0.01026	0	0
461	PD4267a	Breast	WGS	CGP	1396507065	1467076	100	PD4267b	WGS	CGP	1230661779	1192006	100	0.00757371	0.01153	0	0
462	PD4269a	Meningioma	WXS	CGP	84052016	7766	76	PD4269b	WXS	CGP	97142647	906	76	0	0	0.00381437	0.00597
463	PD4270a	Meningioma	WXS	CGP	63292958	9629	76	PD4270b	WXS	CGP	93296978	2350	76	0.00216873	0.00407	0.00652529	0.00925
464	PD4271a	Meningioma	WXS	CGP	113647436	8196	76	PD4271b	WXS	CGP	98116414	691	76	0.00649107	0.00898	0.0062483	0.0088
465	PD4272a	Meningioma	WXS	CGP	122471158	7135	76	PD4272b	WXS	CGP	102944921	1478	76	0	0	0	0
467	PD4274a	Meningioma	WXS	CGP	102521993	7552	76	PD4274b	WXS	CGP	92462930	1312	76	0	0	0	0
468	PD4275a	Meningioma	WXS	CGP	100005284	8517	76	PD4275b	WXS	CGP	90278214	647	76	0	0	0	0
469	PD4276a	Meningioma	WXS	CGP	92348144	16058	76	PD4276b	WXS	CGP	89846688	553	76	0	0	0.000822932	0.00175
470	PD4277a	Meningioma	WXS	CGP	87851492	15082	76	PD4277b	WXS	CGP	99195145	2957	76	0	0	0.00354442	0.00534
471	PD4278a	Meningioma	WXS	CGP	97848547	7991	76	PD4278b	WXS	CGP	115703461	672	76	0	0	0.00284799	0.00446
472	PD4279a	Meningioma	WXS	CGP	99436751	10062	76	PD4279b	WXS	CGP	158776448	3269	76	0.00237643	0.00385	0.00244534	0.00361
473	PD4280a	Meningioma	WXS	CGP	110981970	7927	76	PD4280b	WXS	CGP	78035348	686	76	0	0	0	0
474	PD4281a	Meningioma	WXS	CGP	106276251	5348	76	PD4281b	WXS	CGP	118830315	2882	76	0	0	0	0
475	PD4283a	Multiple myeloma	WXS	CGP	67169483	1230	76	PD4283b	WXS	CGP	99799934	10219	76	0	0	0.000755382	0.00161
476	PD4284c	Multiple myeloma	WXS	CGP	133032515	1564	75	PD4284b	WXS	CGP	76212351	831	76	0.0193203	0.02288	0.00367709	0.00585
477	PD4285a	Multiple myeloma	WXS	CGP	79233507	1900	76	PD4285b	WXS	CGP	75751685	592	76	0.00100351	0.00214	0	0
478	PD4286a	Multiple myeloma	WXS	CGP	50991214	449	76	PD4286b	WXS	CGP	84193296	1212	76	0.00036049	0.00107	0.000727626	0.00155
479	PD4288a	Multiple myeloma	WXS	CGP	68838883	640	76	PD4288b	WXS	CGP	137697974	1741	76	0	0	0.000192827	0.00057
480	PD4289a	Multiple myeloma	WXS	CGP	113280625	2296	76	PD4289b	WXS	CGP	92720599	662	76	0.00431699	0.00616	0.00349869	0.00533
481	PD4290a	Multiple myeloma	WXS	CGP	92078114	479	76	PD4290b	WXS	CGP	109793634	797	76	0.00204918	0.00357	0.00227819	0.00377
482	PD4291a	Multiple myeloma	WXS	CGP	40840296	1442	76	PD4291b	WXS	CGP	97758171	621	76	0.00221791	0.00439	0.00220946	0.00358
483	PD4292d	Multiple myeloma	WXS	CGP	171497712	26136	75	PD4292b	WXS	CGP	77201982	429	76	0	0	0	0
484	PD4293a	Multiple myeloma	WXS	CGP	62026676	461	76	PD4293b	WXS	CGP	86017539	1234	76	0.0102041	0.01391	0	0
485	PD4294a	Multiple myeloma	WXS	CGP	78347371	1098	76	PD4294b	WXS	CGP	89252324	358	76	0.00466563	0.0073	0	0
486	PD4295a	Multiple myeloma	WXS	CGP	86586418	1912	76	PD4295b	WXS	CGP	85420430	253	76	0	0	0	0
487	PD4296a	Multiple myeloma	WXS	CGP	73486255	1284	76	PD4296b	WXS	CGP	107171957	235	76	0	0	0	0
488	PD4299a	Multiple myeloma	WXS	CGP	85256269	1150	76	PD4299b	WXS	CGP	95854435	2043	76	0	0	0	0
489	PD4300a	Multiple myeloma	WXS	CGP	67543542	993	76	PD4300b	WXS	CGP	108228303	1494	76	0.00157183	0.00295	0	0
490	PD4301a	Multiple myeloma	WXS	CGP	69622371	662	76	PD4301b	WXS	CGP	113699749	958	76	0	0	0	0
491	PD4302a	Multiple myeloma	WXS	CGP	93361587	21026	75	PD4302b	WXS	CGP	114017447	16079	75	0.00628001	0.00926	0.0091922	0.01232
492	PD4303a	Multiple myeloma	WXS	CGP	145704330	44103	75	PD4303b	WXS	CGP	111682801	4006	75	0	0	0	0
493	PD4315a	Breast	WGS	CGP	1362593748	1494420	100	PD4315b	WGS	CGP	1095536864	1814556	100	0	0	0	0
495	PD4594a	Breast	WXS	CGP	133816057	31693	76	PD4594b	WXS	CGP	124264922	1959	76	0	0	0	0
496	PD4595a	Breast	WXS	CGP	84646294	53744	75	PD4595b	WXS	CGP	82570018	1388	75	0.00143906	0.0027	0	0
497	PD4596a	Breast	WXS	CGP	84455960	21385	75	PD4596b	WXS	CGP	84177290	1112	75	0	0	0	0
498	PD4599a	Breast	WXS	CGP	93000735	23593	75	PD4599b	WXS	CGP	80793846	6946	75	0.000945925	0.00202	0.00107431	0.00229
499	PD4600a	Breast	WXS	CGP	86351089	27680	75	PD4600b	WXS	CGP	87372400	6360	75	0	0	0	0
500	PD4601a	Breast	WXS	CGP	79401952	10989	75	PD4601b	WXS	CGP	81819662	5913	75	0	0	0.000698324	0.00167
501	PD4602a	Breast	WXS	CGP	40044216	9095	75	PD4602b	WXS	CGP	38697976	3454	75	0.0168176	0.02325	0	0
502	PD4603a	Breast	WXS	CGP	77352005	26887	75	PD4603b	WXS	CGP	84394229	11567	75	0.00235682	0.00442	0.00323298	0.00547
503	PD4604a	Breast	WGS	CGP	1356971501	2636967	100	PD4604b	WGS	CGP	1039428583	307821	100	0.00329761	0.00653	0	0
504	PD4605a	Breast	WGS	CGP	1136587870	2747870	100	PD4605b	WGS	CGP	910884110	524578	100	0.00100604	0.0024	0	0
505	PD4606a	Breast	WGS	CGP	1264590851	2058990	100	PD4606b	WGS	CGP	1112748092	617213	100	0.0029873	0.00591	0	0
506	PD4607a	Breast	WGS	CGP	1317742134	2000151	100	PD4607b	WGS	CGP	1035293012	399376	100	0.0034459	0.00646	0	0
507	PD4608a	Breast	WGS	CGP	1398463067	2901301	100	PD4608b	WGS	CGP	1198797006	523580	100	0.00847458	0.01326	0	0
508	PD4613a	Breast	WGS	CGP	1205219176	1475032	100	PD4613b	WGS	CGP	1205589607	622074	100	0	0	0	0
509	PD4727a	CLL	WGS	CGP	885456477	889801	95	PD4727b	WGS	CGP	835920142	402491	95	0.0319149	0.04654	0	0
510	PD4728a	CLL	WGS	CGP	813202903	1009650	95	PD4728b	WGS	CGP	802991115	306677	95	0	0	0	0
511	PD4771a	MPD	WXS	CGP	137102183	7709	76	PD4771b	WXS	CGP	116724126	7591	76	0	0	0	0
512	PD4772a	MPD	WXS	CGP	111192060	837	75	PD4772b	WXS	CGP	110466288	1477	75	0.00250501	0.00406	0.00244798	0.00383
513	PD4773a	MPD	WXS	CGP	83174406	551	75	PD4773b	WXS	CGP	87232882	1516	75	0.000269978	0.0008	0	0
514	PD4775a	MPD	WXS	CGP	76488451	239	75	PD4775b2	WGS	CGP	1178897628	705015	100	0	0	0.00414938	0.00722
515	PD4776a	MPD	WXS	CGP	95576681	349	75	PD4776b	WXS	CGP	76788577	2879	75	0	0	0	0
517	PD4778a	MPD	WXS	CGP	74656261	356	75	PD4778b	WXS	CGP	71578458	2869	75	0	0	0.00751662	0.0116
518	PD4779a	MPD	WXS	CGP	92946525	368	75	PD4779b	WXS	CGP	106452810	1594	75	0.00424553	0.00665	0.00112444	0.0024
519	PD4780a	MPD	WXS	CGP	108715694	650	75	PD4780b	WXS	CGP	130896905	796	75	0.00231392	0.00382	0.00741656	0.01021
520	PD4781a	MPD	WXS	CGP	119361029	951	75	PD4781b	WXS	CGP	111642362	1406	75	0	0	0	0
521	PD4802a	AMKL	WXS	CGP	111201518	645	75	PD4802b	WXS	CGP	107664732	1866	75	0	0	0	0
522	PD4808a	AMKL	WXS	CGP	224527600	3479	75	PD4808b	WXS	CGP	121204112	2340	75	0	0	0	0
523	PD4809a	AMKL	WXS	CGP	221629636	3562	75	PD4809b	WXS	CGP	109818031	1076	75	0.0017469	0.00258	0.00067242	0.00143
524	PD4820a	Breast	WGS	CGP	1075830542	1562284	100	PD4820b	WGS	CGP	745177364	582758	100	0	0	0	0
525	PD4826a	Breast	WGS	CGP	1364021014	2386078	100	PD4826b	WGS	CGP	1019870899	529931	100	0.00986842	0.01408	0	0
526	PD4833a	Breast	WGS	CGP	1992738853	2374449	100	PD4833b	WGS	CGP	1090592727	922152	100	0.000886525	0.00211	0.0016632	0.00397
527	PD4836a	Breast	WGS	CGP	1301783024	1514787	100	PD4836b	WGS	CGP	1050074784	871984	100	0	0	0	0
528	PD4841a	Breast	WGS	CGP	1357703019	3651180	100	PD4841b	WGS	CGP	1174126028	430941	100	0.00890347	0.0129	0	0
529	PD4842a	Breast	WXS	CGP	99252368	10559	75	PD4842b	WXS	CGP	68684360	2284	75	0	0	0	0
530	PD4843a	Breast	WXS	CGP	89487409	10927	75	PD4843b	WXS	CGP	90540931	2588	75	0.000804182	0.00192	0	0
531	PD4844a	Breast	WGS	CGP	1229092795	1823561	100	PD4844b	WXS	CGP	72043909	2906	75	0.0111204	0.01598	0	0
532	PD4845a	Breast	WGS	CGP	1285870437	1136481	100	PD4845b	WGS	CGP	1196354868	1268183	100	0	0	0	0
533	PD4846a	Breast	WXS	CGP	94601242	7890	75	PD4846b	WXS	CGP	91252658	2898	75	0	0	0	0
534	PD4847a	Breast	WGS	CGP	1538152259	2527244	100	PD4847b2	WGS	CGP	997456584	887707	100	0	0	0	0
535	PD4848b	Lung	WGS	CGP	327010716	313236	50	PD4848a	WGS	CGP	210991021	209667	50	0	0	-1	-1
536	PD4849b	Lung	WGS	CGP	326778984	315212	50	PD4849a	WGS	CGP	304521533	339843	50	0	0	0	0
538	PD4851b	Lung	WGS	CGP	321726897	345569	50	PD4851a	WGS	CGP	111632581	111406	50	0	0	-1	-1
540	PD4853b	Lung	WGS	CGP	314637968	317135	50	PD4853a	WGS	CGP	256886184	263088	50	0	0	0	0
541	PD4854b	Lung	WGS	CGP	328796183	180981	50	PD4854a	WGS	CGP	213388939	276003	50	0	0	-1	-1
542	PD4855b	Lung	WGS	CGP	302244834	353594	50	PD4855a	WGS	CGP	281306936	277775	50	0	0	0	0
544	PD4857b	Lung	WGS	CGP	330883204	352723	50	PD4857a	WGS	CGP	227597336	221422	50	0	0	0	0
546	PD4859b	Lung	WGS	CGP	385987515	215029	50	PD4859a	WGS	CGP	268269777	219857	50	0	0	-1	-1
547	PD4860b	Lung	WGS	CGP	336881881	345294	50	PD4860a	WGS	CGP	110133419	125687	50	0	0	-1	-1
548	PD4861b	Lung	WGS	CGP	334129550	319156	50	PD4861a	WGS	CGP	114187029	139029	50	0	0	-1	-1
549	PD4862b	Lung	WGS	CGP	391055653	440814	50	PD4862a	WGS	CGP	240426376	355907	50	0	0	0	0
550	PD4863b	Lung	WGS	CGP	352925120	273217	50	PD4863a	WGS	CGP	112465774	134587	50	0	0	-1	-1
551	PD4864b	Lung	WGS	CGP	375337136	315651	50	PD4864a	WGS	CGP	119101978	99872	50	0.016	0.04723	-1	-1
553	PD4866b	Lung	WGS	CGP	388676849	454386	50	PD4866a	WGS	CGP	73272622	73544	50	0	0	-1	-1
554	PD4867b	Lung	WGS	CGP	366961553	288285	50	PD4867a	WGS	CGP	102763773	102572	50	0	0	-1	-1
558	PD4871b	Lung	WGS	CGP	387814950	338354	50	PD4871a	WGS	CGP	222089897	254933	50	0.0509554	0.10025	-1	-1
559	PD4872a	Breast	WGS	CGP	939581956	1157061	100	PD4872b	WGS	CGP	1087822090	164162	100	0	0	0	0
560	PD4873a	Breast	WGS	CGP	914198101	1079622	100	PD4873b	WGS	CGP	727544014	138657	100	0	0	0	0
561	PD4874a	Breast	WGS	CGP	991295540	1526453	100	PD4874b	WGS	CGP	897542678	418129	100	0	0	0.00227402	0.00542
562	PD4875a	Breast	WGS	CGP	1051239096	988366	100	PD4875b	WGS	CGP	1247229463	441344	100	0	0	0	0
563	PD4876a	Breast	WGS	CGP	1094553014	2009935	100	PD4876b	WGS	CGP	681967252	446596	100	0	0	0	0
565	PD4884a	Osteosarcoma	WXS	CGP	230136543	40191	75-76	PD4884b	WXS	CGP	191997992	103011	75-76	0	0	0	0
566	PD4885a	Osteosarcoma	WXS	CGP	204688922	54993	75-76	PD4885b	WXS	CGP	204007574	17592	75-76	0.0394339	0.04304	0	0
567	PD4886a	Osteosarcoma	WXS	CGP	81860169	10661	75	PD4886b	WXS	CGP	93353787	1789	75	0.00214297	0.00373	0.00152346	0.00286
568	PD4887a	Osteosarcoma	WXS	CGP	73930096	20521	75	PD4887b	WXS	CGP	101493806	213983	75	0.00521901	0.00795	0.00278784	0.00451
569	PD4888a	Osteosarcoma	WXS	CGP	78774527	7517	75	PD4888b	WXS	CGP	92131171	98199	75	0.00104475	0.00223	0	0
570	PD4889a	Osteosarcoma	WXS	CGP	70610175	5095	75	PD4889b	WXS	CGP	81982347	23537	75	0.00247001	0.0043	0.00620767	0.0088
571	PD4890a	Osteosarcoma	WXS	CGP	72750022	6505	75	PD4890b	WXS	CGP	81531973	44286	75	0.000320667	0.00095	0.00147232	0.00276
572	PD4891a	Osteosarcoma	WXS	CGP	126645580	10618	75	PD4891b	WXS	CGP	79530985	51559	75	0.016406	0.01967	0.00218511	0.0038
573	PD4892a	Osteosarcoma	WXS	CGP	89610510	13037	75	PD4892b	WXS	CGP	92363937	2688	75	0	0	0	0
574	PD4893a	Osteosarcoma	WXS	CGP	125940227	8642	75	PD4893b	WXS	CGP	110141784	26966	75	0.00490246	0.00686	0.000682905	0.00146
575	PD4894a	Osteosarcoma	WXS	CGP	119068564	6520	75	PD4894b	WXS	CGP	121522705	173270	75	0.00234542	0.00373	0.00131332	0.00229
576	PD4895a	Osteosarcoma	WXS	CGP	50970803	8946	75	PD4895b	WXS	CGP	129436469	98442	75	0	0	0.00021901	0.00065
577	PD4896a	Osteosarcoma	WXS	CGP	73611021	12195	75	PD4896b	WXS	CGP	144877987	5381	75	0.00223964	0.00403	0	0
578	PD4897a	Osteosarcoma	WXS	CGP	44788611	4690	75	PD4897b	WXS	CGP	209672427	5070	75	0.000647878	0.00192	0	0
579	PD4898a	Osteosarcoma	WXS	CGP	70595184	5877	75	PD4898b	WXS	CGP	154944860	2661	75	0.0437802	0.05083	0	0
580	PD4900a	Osteosarcoma	WXS	CGP	101170834	19966	75	PD4900b	WXS	CGP	139257825	3098	75	0.0202571	0.02413	0	0
581	PD4901a	Osteosarcoma	WXS	CGP	99926040	12304	75	PD4901b	WXS	CGP	77040593	4712	75	0.0022892	0.00412	0.000501882	0.00149
582	PD4902a	Osteosarcoma	WXS	CGP	107040407	13392	75	PD4902b	WXS	CGP	81985531	93658	75	0.000625684	0.00149	0	0
583	PD4903a	Osteosarcoma	WXS	CGP	108933614	71795	75	PD4903b	WXS	CGP	87948029	113136	75	0.00200844	0.00377	0.00174787	0.00346
584	PD4904a	Osteosarcoma	WXS	CGP	98604260	19406	75	PD4904b	WXS	CGP	95603549	125716	75	0.0106409	0.01381	0.00230647	0.0039
585	PD4905a	Osteosarcoma	WXS	CGP	97546911	13293	75	PD4905b	WXS	CGP	97912446	163799	75	0.00916964	0.01262	0	0
586	PD4906a	Osteosarcoma	WXS	CGP	90615473	17146	75	PD4906b	WXS	CGP	72711579	59855	75	0	0	0.00254345	0.00458
587	PD4907a	Osteosarcoma	WXS	CGP	96830400	35739	75	PD4907b	WXS	CGP	87011130	174540	75	0.00933881	0.01299	0	0
588	PD4908a	Osteosarcoma	WXS	CGP	103735826	16329	75	PD4908b	WXS	CGP	92826560	89472	75	0.00994275	0.01333	0	0
589	PD4909a	Osteosarcoma	WXS	CGP	93790775	6240	75	PD4909b	WXS	CGP	90275376	65350	75	0.00322269	0.00522	0.00214171	0.00385
590	PD4910a	Osteosarcoma	WXS	CGP	95523026	58194	75	PD4910b	WXS	CGP	74957732	63205	75	0.00744879	0.01002	0	0
591	PD4911a	Osteosarcoma	WXS	CGP	105286226	11830	75	PD4911b	WXS	CGP	90823185	41931	75	0	0	0	0
592	PD4912a	Osteosarcoma	WXS	CGP	94592448	21190	75	PD4912b	WXS	CGP	79490093	59982	75	0	0	0	0
593	PD4913a	Osteosarcoma	WXS	CGP	100826622	16949	75	PD4913b	WXS	CGP	76570327	75991	75	0.00721262	0.01009	0	0
594	PD4914a	Osteosarcoma	WXS	CGP	88559379	43062	75	PD4914b	WXS	CGP	80041491	126722	75	0.00107778	0.0023	0	0
595	PD4915a	Osteosarcoma	WXS	CGP	101226108	53992	75	PD4915b	WXS	CGP	91361648	84267	75	0	0	0.00148258	0.00278
597	PD4917a	Osteosarcoma	WXS	CGP	93265337	8287	75	PD4917b	WXS	CGP	80150794	50768	75	0.00523685	0.00742	0.00163693	0.00307
598	PD4918a	Osteosarcoma	WXS	CGP	89194445	28150	75	PD4918b	WXS	CGP	85663231	95589	75	0.00179897	0.00356	0.003367	0.0057
599	PD4919a	Osteosarcoma	WXS	CGP	100686654	24048	75	PD4919b	WXS	CGP	79793526	38583	75	0.00332226	0.00538	0	0
600	PD4920a	Osteosarcoma	WXS	CGP	85852511	27858	75	PD4920b	WXS	CGP	70800492	70805	75	0	0	0.00273373	0.00513
601	PD4921a	Osteosarcoma	WXS	CGP	101662744	30625	75	PD4921b	WXS	CGP	86086825	92173	75	0	0	0	0
602	PD4922a	Osteosarcoma	WXS	CGP	104002125	20499	75	PD4922b	WXS	CGP	76337125	54788	75	0	0	0.00263713	0.00495
603	PD4923a	Osteosarcoma	WXS	CGP	99325296	19402	75	PD4923b	WXS	CGP	77892608	61613	75	0.00824801	0.01124	0.000368596	0.00109
604	PD4924a	Osteosarcoma	WXS	CGP	97189411	41466	75	PD4924b	WXS	CGP	68806774	75651	75	0.0021842	0.00393	0.0042328	0.00716
605	PD4925a	Osteosarcoma	WXS	CGP	162662944	23064	75	PD4925b	WXS	CGP	143890303	145897	75	0.0161546	0.01936	0	0
606	PD4926a	Chordoma	WXS	CGP	60494849	9828	100	PD4926b	WXS	CGP	117461185	265174	100	0	0	0	0
607	PD4927a	Osteosarcoma	WGS	CGP	152831495	220030	50	PD4927b	WXS	CGP	49314505	1848	100	-1	-1	0	0
608	PD4928a	Chordoma	WXS	CGP	66659336	10892	100	PD4928b	WXS	CGP	68464963	545	100	0	0	0.00115691	0.00229
609	PD4929a	Chordoma	WXS	CGP	24982871	19101	100	PD4929b	WXS	CGP	75832206	2036	100	0	0	0	0
610	PD4930a	Gastric	WXS	CGP	90781094	77835	74	PD4930b	WXS	CGP	84613199	45079	74	0.0008726	0.00208	0	0
611	PD4931a	Gastric	WXS	CGP	93923534	46088	74	PD4931b	WXS	CGP	82478314	39764	74	0.0110199	0.01416	0.000686106	0.00164
612	PD4932a	Gastric	WXS	CGP	69249324	52262	74	PD4932b	WXS	CGP	64863390	131803	74	0.00518695	0.00812	0.00124224	0.00296
613	PD4933a	Gastric	WXS	CGP	69880552	17405	74	PD4933b	WXS	CGP	69223124	95539	74	0	0	0	0
614	PD4934a	Breast	WXS	CGP	86553150	20984	75	PD4934b	WXS	CGP	85890483	2041	75	0	0	0.0216056	0.0275
615	PD4935a	Breast	WXS	CGP	82239505	18190	75	PD4935b	WXS	CGP	86574309	1985	75	0.0062167	0.00947	0.0517755	0.0612
616	PD4936a	Breast	WXS	CGP	82768807	11207	75	PD4936b	WXS	CGP	95625043	1184	75	0.00198446	0.00357	0	0
617	PD4937a	Breast	WXS	CGP	84132763	48868	75	PD4937b	WXS	CGP	85099820	1140	75	0.00045045	0.00133	0.025226	0.03157
618	PD4938a	Breast	WXS	CGP	83051914	20518	75	PD4938b	WXS	CGP	88153691	1315	75	0.00453148	0.0069	0	0
619	PD4939a	Breast	WXS	CGP	80869007	12601	75	PD4939b	WXS	CGP	86872485	1187	75	0.0133854	0.01774	0	0
620	PD4940a	MPD	WXS	CGP	162365398	441	75	PD4940b	WXS	CGP	213511108	20550	75	0.00019604	0.00058	0.00624369	0.00834
621	PD4941a	MPD	WXS	CGP	109954333	700	75	PD4941b	WXS	CGP	81866816	1444	75	0.000910747	0.0018	0	0
622	PD4942a	MPD	WXS	CGP	154726542	478	75	PD4942b	WXS	CGP	72423060	13875	75	0	0	0.143448	0.18101
623	PD4943a	MPD	WXS	CGP	165899740	843	75	PD4943b	WXS	CGP	79141156	1401	75	0	0	0.0194536	0.02405
624	PD4944a	MPD	WXS	CGP	146855545	798	75	PD4944b	WXS	CGP	83415732	297	75	0.00103146	0.00194	0.00243563	0.00424
625	PD4947a2	MPD	WXS	CGP	84287448	2020	75	PD4947b2	WGS	CGP	808699195	173646	100	0.0113988	0.01516	0	0
626	PD4951a	Breast	WGS	CGP	1377362646	2285043	100	PD4951b	WGS	CGP	912874442	355375	100	0	0	0	0
627	PD4952a	Breast	WGS	CGP	1300176364	1497079	100	PD4952b	WGS	CGP	944509902	532678	100	0.00319404	0.00575	0.00217628	0.00519
628	PD4953a	Breast	WGS	CGP	1190603315	1518582	100	PD4953b	WGS	CGP	1035058186	382467	100	0	0	0	0
629	PD4954a	Breast	WGS	CGP	1262256291	900652	100	PD4954b	WGS	CGP	1033988869	418764	100	0	0	0	0
630	PD4955a	Breast	WGS	CGP	1271175097	1679640	100	PD4955b	WGS	CGP	969300629	545707	100	0.00204604	0.00405	0	0
631	PD4956a	Breast	WGS	CGP	1322638222	2238786	100	PD4956b	WGS	CGP	858169122	530814	100	0.00118133	0.00282	0	0
632	PD4957a	Breast	WGS	CGP	1203486841	2268870	100	PD4957b	WGS	CGP	1067853700	378985	100	0.00547445	0.00985	0	0
633	PD4958a	Breast	WGS	CGP	1126354688	1554043	100	PD4958b	WGS	CGP	930431466	399245	100	0	0	0	0
634	PD4959a	Breast	WGS	CGP	1223837049	2036252	100	PD4959b	WGS	CGP	1068513167	1316926	100	0.00276243	0.00547	0	0
635	PD4962a	Breast	WGS	CGP	1652363192	2564902	100	PD4962b	WGS	CGP	1916684004	3706682	100	0	0	0	0
636	PD4963a	Breast	WGS	CGP	1191318993	1521559	100	PD4963b	WGS	CGP	1004845257	1716746	100	0	0	0.0584016	0.07334
637	PD4965a	Breast	WGS	CGP	1363327555	2383940	100	PD4965b	WGS	CGP	1028149664	2308484	100	0	0	0	0
638	PD4966a	Breast	WGS	CGP	1252313334	1941119	100	PD4966b	WGS	CGP	950489450	1128266	100	0	0	0	0
639	PD4967a	Breast	WGS	CGP	1333526123	2211627	100	PD4967b	WGS	CGP	1045336856	1301476	100	0	0	0.00644468	0.01159
640	PD4968a	Breast	WGS	CGP	1175547205	1806990	100	PD4968b	WGS	CGP	1138467217	1670469	100	0.0035461	0.00665	0.00404858	0.00801
641	PD4969a	Breast	WGS	CGP	1270900123	1440436	100	PD4969b	WGS	CGP	1336851103	691430	100	0.000660939	0.00196	0	0
642	PD4970a	Breast	WGS	CGP	1266061514	2486679	100	PD4970b	WGS	CGP	941473549	1386137	100	0	0	0	0
643	PD4971a	Breast	WGS	CGP	1256102401	1938462	100	PD4971b	WGS	CGP	988599316	492169	100	0	0	0	0
644	PD4972a	Breast	WGS	CGP	1336773144	1446938	100	PD4972b	WGS	CGP	977118566	1491001	100	0	0	0	0
645	PD4975a	Breast	WGS	CGP	1224470361	2711319	100	PD4975b	WGS	CGP	920842747	245023	100	0.0480274	0.06045	0	0
646	PD4976a	Breast	WGS	CGP	1265145075	4390646	100	PD4976b	WGS	CGP	1208520885	3486838	100	0.00718431	0.01108	0.00069541	0.00206
647	PD4977a	Breast	WGS	CGP	1214864462	2726501	100	PD4977b	WGS	CGP	1133600910	820718	100	0	0	0	0
648	PD4978a	Breast	WGS	CGP	868806201	1885119	100	PD4978b	WGS	CGP	908879328	735683	100	0.0056101	0.0111	0.00200803	0.00479
649	PD4979a	Breast	WGS	CGP	1320090097	2061883	100	PD4979b	WGS	CGP	950254354	684549	100	0.00123267	0.00294	0	0
650	PD4980a	Breast	WGS	CGP	1176682594	1305286	100	PD4980b	WGS	CGP	1138207274	656070	100	0.00549073	0.00929	0	0
651	PD4981a	Breast	WGS	CGP	1213751796	1360682	100	PD4981b	WGS	CGP	1129556277	709041	100	0	0	0	0
652	PD4982a	Breast	WGS	CGP	1266938490	3805658	100	PD4982b	WGS	CGP	1009301710	754286	100	0	0	0.000791766	0.00234
653	PD4983a	Breast	WGS	CGP	1134617219	3565935	100	PD4983b	WGS	CGP	1031047261	770502	100	0.00141443	0.00337	0	0
654	PD4985a	Breast	WGS	CGP	1364928448	4737013	100	PD4985b	WGS	CGP	972749978	519236	100	0	0	0	0
655	PD4986a	Breast	WGS	CGP	1224038386	1592195	100	PD4986b	WGS	CGP	1160234263	1999690	100	0.00298597	0.0056	0	0
656	PD4990a2	MPD	WXS	CGP	60524038	1189	75	PD4990b2	WXS	CGP	80731011	4167	75	0.0123101	0.01656	0.00863185	0.01171
657	PD4994a2	MPD	WXS	CGP	60792458	911	75	PD4994b2	WXS	CGP	64426100	3489	75	0.000712631	0.0017	0.0029553	0.005
658	PD4996a2	MPD	WXS	CGP	58789844	758	75	PD4996b2	WXS	CGP	71994973	4345	75	0.000483793	0.00143	0.00176289	0.00349
659	PD5003a2	MPD	WXS	CGP	49069261	1265	75	PD5003b2	WXS	CGP	73339385	5006	75	0.00403859	0.00667	0.0148637	0.0197
660	PD5004a2	MPD	WXS	CGP	56147124	1014	75	PD5004b2	WXS	CGP	74542607	2648	75	0	0	0.0043894	0.00669
661	PD5005a2	MPD	WXS	CGP	54806982	1211	75	PD5005b2	WXS	CGP	77077976	2602	75	0.0196486	0.02496	0.00895576	0.01246
662	PD5008a2	MPD	WXS	CGP	62442931	706	75	PD5008b2	WXS	CGP	78370814	4383	75	0.000479157	0.00142	0.0017138	0.00339
663	PD5010a2	MPD	WXS	CGP	102030485	3377	75	PD5010b	WXS	CGP	95873566	19084	75	0.00876289	0.0117	0.00190235	0.00342
664	PD5014a2	MPD	WXS	CGP	68203890	1310	75	PD5014b2	WXS	CGP	58596651	980	75	0.0024951	0.00434	0.00369686	0.00643
665	PD5027a2	MPD	WXS	CGP	62748263	950	75	PD5027b2	WXS	CGP	63886457	4490	75	0.00453429	0.0071	0.00547809	0.00871
666	PD5029a2	MPD	WXS	CGP	66916121	1162	75	PD5029b2	WXS	CGP	64450150	2708	75	0	0	0.00829187	0.01248
667	PD5111a	MPD	WXS	CGP	130846020	450	75	PD5111b	WXS	CGP	146147563	289	75	0	0	0	0
668	PD5115a2	MPD	WXS	CGP	86167439	2294	75	PD5115b	WXS	CGP	96013162	5595	75	0.0117007	0.01519	0.0040954	0.00604
670	PD5120a	MPD	WXS	CGP	159282538	545	75	PD5120b	WXS	CGP	132506850	384	75	0.000977708	0.00183	0.00202361	0.00335
671	PD5122a	MPD	WXS	CGP	138180889	553	75	PD5122b	WXS	CGP	106142895	1499	75	0.000519706	0.00111	0.00252711	0.00396
672	PD5125a2	MPD	WXS	CGP	94377249	2285	75	PD5125b	WXS	CGP	96497901	12922	75	0.000291886	0.00086	0.00178412	0.00321
673	PD5151a2	MPD	WXS	CGP	91235348	1476	75	PD5151b	WXS	CGP	147499124	989	75	0.0614585	0.06881	0.00631524	0.00837
674	PD5175a2	MPD	WXS	CGP	111777210	3577	75	PD5175b	WXS	CGP	153924335	5089	75	0.00619124	0.00852	0.00906422	0.01117
675	PD5847a	MPD	WXS	CGP	121757018	586	75	PD5847b	WXS	CGP	105743982	427	75	0	0	0	0
676	PD5848a	MPD	WXS	CGP	142535655	494	75	PD5848b	WXS	CGP	157452448	1147	75	0.00112215	0.00195	0.00476961	0.00653
677	PD5849a	Multiple myeloma	WXS	CGP	80674459	6385	75	PD5849b	WXS	CGP	79591039	4431	75	0.00407249	0.00659	0	0
678	PD5850a	Multiple myeloma	WXS	CGP	83904292	4429	75	PD5850b	WXS	CGP	87861376	2080	75	0.0122011	0.01697	0.000957167	0.00228
679	PD5851a	Multiple myeloma	WXS	CGP	73296234	9203	75	PD5851b	WXS	CGP	86103855	3175	75	0	0	0	0
680	PD5852a	Multiple myeloma	WXS	CGP	69721648	5324	75	PD5852b	WXS	CGP	79970720	1446	75	0	0	0.000860215	0.00205
681	PD5853a	Multiple myeloma	WXS	CGP	78960124	6618	75	PD5853b	WXS	CGP	76865282	1531	75	0.0128205	0.01804	0.00116448	0.00278
684	PD5856a	Multiple myeloma	WXS	CGP	73648708	7224	75	PD5856b	WXS	CGP	71550336	2099	75	0.014877	0.01953	0	0
685	PD5857a	Multiple myeloma	WXS	CGP	79999445	7298	75	PD5857b	WXS	CGP	79244999	1540	75	0.00135501	0.00268	0.00191083	0.00344
686	PD5858a	Multiple myeloma	WXS	CGP	81657726	8134	75	PD5858b	WXS	CGP	75030751	1481	75	0.00682594	0.01053	0.00197239	0.0039
687	PD5859a	Multiple myeloma	WXS	CGP	87067458	8993	75	PD5859b	WXS	CGP	76282740	1535	75	0	0	0.000409082	0.00121
688	PD5860a	Multiple myeloma	WXS	CGP	86711961	6489	75	PD5860b	WXS	CGP	91259787	1260	75	0.00491685	0.00725	0	0
689	PD5861a	Multiple myeloma	WXS	CGP	96504627	6913	75	PD5861b	WXS	CGP	80268915	1908	75	0	0	0	0
690	PD5862a	Multiple myeloma	WXS	CGP	96824163	8370	75	PD5862b	WXS	CGP	92237145	1804	75	0.000839161	0.00179	0	0
691	PD5863a	Multiple myeloma	WXS	CGP	95648460	5715	75	PD5863b	WXS	CGP	73799182	2090	75	0.00652809	0.00946	0	0
692	PD5864a	Multiple myeloma	WXS	CGP	81006205	10880	75	PD5864b	WXS	CGP	77194703	1513	75	0.003961	0.00611	0.000968679	0.00206
693	PD5865a	Multiple myeloma	WXS	CGP	165886373	11440	75	PD5865b	WXS	CGP	68003490	1416	75	0	0	0.000814001	0.00194
694	PD5866a	Multiple myeloma	WXS	CGP	179483281	10392	75	PD5866b	WXS	CGP	70178605	1010	75	0.00401531	0.00541	0.00273598	0.00452
695	PD5867a	Multiple myeloma	WXS	CGP	92771387	10297	75	PD5867b	WXS	CGP	58890324	1425	75	0.00131255	0.0026	0	0
696	PD5868a	Multiple myeloma	WXS	CGP	93944074	21598	75	PD5868b	WXS	CGP	84087336	1440	75	0	0	0	0
697	PD5869a	Multiple myeloma	WXS	CGP	100400820	10921	75	PD5869b	WXS	CGP	85635862	2076	75	0.00105876	0.00226	0	0
698	PD5870a	Multiple myeloma	WXS	CGP	103238229	13181	75	PD5870b	WXS	CGP	82418136	1918	75	0	0	0	0
699	PD5871a	Multiple myeloma	WXS	CGP	104704415	5486	75	PD5871b	WXS	CGP	88924224	1776	75	0.00683761	0.00957	0.00139665	0.00276
700	PD5872a	Multiple myeloma	WXS	CGP	104242921	9802	75	PD5872b	WXS	CGP	84874527	1696	75	0	0	0	0
701	PD5873a	Multiple myeloma	WXS	CGP	95690041	4104	75	PD5873b	WXS	CGP	82458479	1499	75	0.00490381	0.00757	0	0
703	PD5875a	Multiple myeloma	WXS	CGP	131470956	20241	75	PD5875b	WXS	CGP	132762508	3134	75	0	0	0	0
704	PD5876a	Multiple myeloma	WXS	CGP	89244394	12918	75	PD5876b	WXS	CGP	100045530	2615	75	0.00121341	0.0024	0.00055394	0.00132
705	PD5877a	Multiple myeloma	WXS	CGP	87451480	7737	75	PD5877b	WXS	CGP	96237659	2329	75	0.00147254	0.00276	0	0
706	PD5878a	Multiple myeloma	WXS	CGP	93553505	11420	75	PD5878b	WXS	CGP	97319003	2708	75	0.000611247	0.00146	0	0
707	PD5879a	Multiple myeloma	WXS	CGP	89739646	16722	75	PD5879b	WXS	CGP	95992180	2471	75	0	0	0	0
708	PD5880a	Multiple myeloma	WXS	CGP	101266821	30187	75	PD5880b	WXS	CGP	101840160	1993	75	0	0	0	0
709	PD5881a	Multiple myeloma	WXS	CGP	98122777	8150	75	PD5881b	WXS	CGP	98816058	2122	75	0.000829187	0.00198	0	0
710	PD5882a	Multiple myeloma	WXS	CGP	94004358	4971	75	PD5882b	WXS	CGP	91368500	1520	75	0	0	0	0
711	PD5883a	Multiple myeloma	WXS	CGP	96568788	6361	75	PD5883b	WXS	CGP	99681422	1363	75	0.000332613	0.00098	0	0
712	PD5884a	Multiple myeloma	WXS	CGP	102422155	8437	75	PD5884b	WXS	CGP	98506835	2259	75	0.00183751	0.0032	0	0
713	PD5885a	Multiple myeloma	WXS	CGP	92250528	3432	75	PD5885b	WXS	CGP	95448942	2703	75	0.00276285	0.00457	0.000921093	0.00196
714	PD5886a	Multiple myeloma	WXS	CGP	92296334	4316	75	PD5886b	WXS	CGP	83968362	1508	75	0.00434419	0.0067	0	0
715	PD5887a	Multiple myeloma	WXS	CGP	93473869	5709	75	PD5887b	WXS	CGP	82030496	2462	75	0.00299658	0.00521	0	0
716	PD5888a	Multiple myeloma	WXS	CGP	100088637	10329	75	PD5888b	WXS	CGP	85668268	2411	75	0	0	0	0
717	PD5889a	Multiple myeloma	WXS	CGP	93068452	7139	75	PD5889b	WXS	CGP	84446951	2141	75	0.00183621	0.00344	0	0
718	PD5890a	Multiple myeloma	WXS	CGP	91744717	14178	75	PD5890b	WXS	CGP	85206573	1637	75	0.00878522	0.01198	0	0
719	PD5891a	Multiple myeloma	WXS	CGP	92167325	3364	75	PD5891b	WXS	CGP	86280692	1180	75	0	0	0	0
720	PD5892a	Multiple myeloma	WXS	CGP	88898112	19183	75	PD5892b	WXS	CGP	84694340	1915	75	0.00452011	0.00681	0.00222046	0.00386
721	PD5893a	Multiple myeloma	WXS	CGP	88201783	4260	75	PD5893b	WXS	CGP	95315457	3236	75	0	0	0	0
722	PD5894a	Multiple myeloma	WXS	CGP	88126401	7692	75	PD5894b	WXS	CGP	89639701	1693	75	0	0	0	0
723	PD5895a	Multiple myeloma	WXS	CGP	91054839	12854	75	PD5895b	WXS	CGP	87826085	1972	75	0.00198722	0.00346	0	0
724	PD5896a	Multiple myeloma	WXS	CGP	86651158	10486	75	PD5896b	WXS	CGP	85175918	2356	75	0.00142491	0.00267	0.000289687	0.00086
725	PD5897a	Multiple myeloma	WXS	CGP	83023939	7270	75	PD5897b	WXS	CGP	86527503	2665	75	0	0	0	0
726	PD5898a	Multiple myeloma	WXS	CGP	129462062	10344	75	PD5898b	WXS	CGP	124114813	3841	75	0.00291715	0.00439	0	0
728	PD5900a	Multiple myeloma	WXS	CGP	143821547	6872	75	PD5900b	WXS	CGP	161792548	4302	75	0	0	0	0
729	PD5901a	Multiple myeloma	WXS	CGP	80760821	7784	75	PD5901b	WXS	CGP	89557979	3080	75	0.00271534	0.00449	0	0
730	PD5902a	Kaposi sarcoma	WXS	CGP	213369315	35255	75	PD5902b	WXS	CGP	89513892	9758	75	0.00322243	0.00463	0.00457856	0.00728
731	PD5903a	Kaposi sarcoma	WXS	CGP	209202929	65227	75	PD5903b	WXS	CGP	92910126	12212	75	0.00445931	0.00588	0.00271961	0.0044
732	PD5904a	Kaposi sarcoma	WXS	CGP	199283218	35011	75	PD5904b	WXS	CGP	94986378	16089	75	0.00141632	0.00234	0.00135547	0.00268
733	PD5905a	Kaposi sarcoma	WXS	CGP	201216271	48785	75	PD5905b	WXS	CGP	101912264	19790	75	0	0	0	0
734	PD5906a	Kaposi sarcoma	WXS	CGP	235297178	29446	75	PD5906b	WXS	CGP	75941705	7229	75	0.000986972	0.0016	0.00064082	0.00153
735	PD5907a	Kaposi sarcoma	WXS	CGP	227024033	31955	75	PD5907b	WXS	CGP	95000570	11224	75	0.00455613	0.00613	0.0290323	0.03531
736	PD5908a	Kaposi sarcoma	WXS	CGP	225064645	39028	75	PD5908b	WXS	CGP	74806340	9061	75	0.00163921	0.00265	0.0444444	0.05352
737	PD5909a	Kaposi sarcoma	WXS	CGP	207367117	26127	75	PD5909b	WXS	CGP	64445313	8850	75	0.00645729	0.00816	0	0
738	PD5911a	Kaposi sarcoma	WXS	CGP	167653083	48987	75	PD5911b	WXS	CGP	78601747	12183	75	0	0	0	0
739	PD5915a	Osteosarcoma	WXS	CGP	165418474	45969	75	PD5915b	WXS	CGP	129683048	138413	75	0.00172216	0.00285	0.0068312	0.00923
740	PD5916a	Osteosarcoma	WXS	CGP	90700183	15130	75	PD5916b	WXS	CGP	81976474	106474	75	0.000691443	0.00165	0.00863185	0.01241
742	PD5918a	Osteosarcoma	WXS	CGP	89023464	9323	75	PD5918b	WXS	CGP	66647415	103880	75	0.0188274	0.02369	0.00717189	0.01079
743	PD5919a	Osteosarcoma	WXS	CGP	92401505	20962	75	PD5919b	WXS	CGP	81932792	67621	75	0.00264114	0.00447	0.0021777	0.00409
744	PD5920a	Osteosarcoma	WXS	CGP	82086081	21193	75	PD5920b	WXS	CGP	75662559	90491	75	0.000864118	0.00206	0.00307018	0.00534
745	PD5921a	Osteosarcoma	WXS	CGP	89340961	25427	75	PD5921b	WXS	CGP	69701428	71967	75	0.0141327	0.01909	0	0
746	PD5922a	Osteosarcoma	WXS	CGP	94523456	31527	75	PD5922b	WXS	CGP	79556312	79297	75	0.00137931	0.00273	0	0
748	PD5924a	Osteosarcoma	WXS	CGP	175973960	45089	75	PD5924b	WXS	CGP	148253391	112526	75	0.0101031	0.01243	0.0472455	0.05283
749	PD5925a	Breast	WGS	CGP	1263221591	1558695	100	PD5925b	WGS	CGP	981002349	99180	100	0.00173235	0.00413	0.00220022	0.00525
750	PD5928a	Breast	WGS	CGP	1481838957	2391532	100	PD5928b	WGS	CGP	898792309	81699	100	0	0	0	0
751	PD5930a	Breast	WGS	CGP	1222913709	1753540	100	PD5930b	WGS	CGP	1075367837	512268	100	0	0	0	0
753	PD5934a	Breast	WGS	CGP	1305685196	1025766	100	PD5934b	WGS	CGP	1012852564	638693	100	0.000635324	0.00188	0.00108932	0.00322
754	PD5935a	Breast	WGS	CGP	1418689226	1559411	100	PD5935b	WGS	CGP	1073350078	540093	100	0.00135593	0.00289	0	0
755	PD5936a	Breast	WGS	CGP	1316647868	1077363	100	PD5936b	WGS	CGP	990969541	554998	100	0	0	0	0
756	PD5937a	Breast	WGS	CGP	1326026693	1393000	100	PD5937b	WGS	CGP	533642355	386985	100	0.00197174	0.00355	0.00202532	0.00483
757	PD5938a	Breast	WGS	CGP	1185413711	1193547	100	PD5938b	WGS	CGP	516836026	268314	100	0.017922	0.02367	0.00120919	0.00358
758	PD5942a	Breast	WGS	CGP	1458152425	1336324	100	PD5942b	WGS	CGP	1037865646	503968	100	0.0142566	0.02033	0	0
759	PD5944a	Breast	WGS	CGP	1158671453	1783054	100	PD5944b	WGS	CGP	1044992294	499568	100	0.00131883	0.00315	0	0
760	PD5945a	Breast	WGS	CGP	1162314146	1170077	100	PD5945b	WGS	CGP	1181534430	697712	100	0.0126204	0.01828	0	0
761	PD5946a	Breast	WGS	CGP	1298746484	877801	100	PD5946b	WGS	CGP	522755482	440350	100	0.000527287	0.00156	0	0
762	PD5947a	Breast	WGS	CGP	1437791127	2074870	100	PD5947b	WGS	CGP	1174761975	629329	100	0	0	0	0
763	PD5948a	Breast	WGS	CGP	1296745295	1083207	100	PD5948b	WGS	CGP	1097796966	775065	100	0.0121522	0.0176	0	0
764	PD5950a	Breast	WGS	CGP	1261400758	1313389	100	PD5950b	WGS	CGP	968416818	263130	100	0.00519312	0.00879	0	0
765	PD5951a	Breast	WGS	CGP	1335117962	2962974	100	PD5951b	WGS	CGP	815949265	423919	100	0.0119389	0.0166	0	0
766	PD5953a	Breast	WGS	CGP	1393170913	3190047	100	PD5953b	WGS	CGP	535008953	578256	100	0.00645284	0.00952	0.0030785	0.00656
767	PD5954a	Breast	WGS	CGP	1168944376	1287933	100	PD5954b	WGS	CGP	528536607	451404	100	0.000862069	0.00206	0	0
768	PD5956a	Breast	WGS	CGP	1331258008	3412690	100	PD5956b	WGS	CGP	872504722	667591	100	0.00889587	0.01312	0.00174902	0.00417
769	PD5959a	Breast	WGS	CGP	1079661750	985251	100	PD5959b	WGS	CGP	604684618	596262	100	0.00217273	0.0043	0	0
770	PD5960a	Breast	WGS	CGP	1084476745	1633708	100	PD5960b	WGS	CGP	803959463	391098	100	0.00150225	0.0032	0	0
771	PD5961a	Breast	WGS	CGP	1300366795	1049156	100	PD5961b	WGS	CGP	957450569	697320	100	0	0	0.00197304	0.0042
772	PD5964a	Breast	WGS	CGP	1138265171	1440093	100	PD5964b	WGS	CGP	670758208	472963	100	0.00123305	0.00263	0	0
773	PD6016a2	Breast	WGS	CGP	759482192	590131	95-100	PD6016b	WGS	CGP	393799829	273998	95-100	0.00340522	0.00726	0	0
774	PD6018a	Breast	WGS	CGP	1242135279	1927900	100	PD6018b	WGS	CGP	1117855358	1127847	100	0	0	0	0
775	PD6022a	Gastric	WXS	CGP	82964308	70054	74	PD6022b	WXS	CGP	79033072	26452	74	0	0	0	0
776	PD6023a	Gastric	WXS	CGP	86876435	35381	74	PD6023b	WXS	CGP	84082094	42932	74	0.0192073	0.02393	0	0
777	PD6024a	Gastric	WXS	CGP	96687529	56967	76	PD6024b	WXS	CGP	96830948	45874	76	0	0	0	0
778	PD6025a	Gastric	WXS	CGP	86154308	37413	74	PD6025b	WXS	CGP	86151157	89994	74	0	0	0	0
779	PD6026a	Gastric	WXS	CGP	89478362	34394	74	PD6026b	WXS	CGP	85171886	36221	74	0.00258732	0.00419	0.00676555	0.00936
780	PD6027a	Gastric	WXS	CGP	88054973	27064	74	PD6027b	WXS	CGP	82429646	41715	74	0.00101232	0.00216	0.00229148	0.0043
781	PD6028a	Gastric	WXS	CGP	88750215	26082	74	PD6028b	WXS	CGP	94050454	38644	74	0	0	0	0
782	PD6029a	Gastric	WXS	CGP	85839610	35747	74	PD6029b	WXS	CGP	89136528	76461	74	0	0	0	0
783	PD6030a	Gastric	WXS	CGP	56719723	17562	74	PD6030b	WXS	CGP	82400639	33353	74	0	0	0	0
785	PD6032a	Cholangiocarcinoma	WXS	CGP	84975525	31970	74	PD6032b	WXS	CGP	73696068	19559	74	0	0	0	0
786	PD6033a	Cholangiocarcinoma	WXS	CGP	74117139	46035	74	PD6033b	WXS	CGP	77092812	58458	74	0	0	0	0
787	PD6034a	Cholangiocarcinoma	WXS	CGP	81660473	39374	74	PD6034b	WXS	CGP	74923082	52495	74	0	0	0	0
788	PD6035a	Cholangiocarcinoma	WXS	CGP	90249271	40226	74	PD6035b	WXS	CGP	88376839	80134	74	0	0	0	0
790	PD6037a	Cholangiocarcinoma	WXS	CGP	67072848	12720	74	PD6037b	WXS	CGP	70417119	81755	74	0.00369686	0.00643	0	0
791	PD6038a	Cholangiocarcinoma	WXS	CGP	89407864	26138	74	PD6038b	WXS	CGP	81782270	60357	74	0.000290951	0.00086	0.00154512	0.0029
792	PD6039a	Cholangiocarcinoma	WXS	CGP	83610023	38951	74	PD6039b	WXS	CGP	85650581	122296	74	0.0029484	0.00487	0.006628	0.00953
793	PD6040a	Cholangiocarcinoma	WXS	CGP	82431700	22337	74	PD6040b	WXS	CGP	89527696	80760	74	0	0	0	0
794	PD6041a	Breast	WGS	CGP	1338670224	2078222	100	PD6041b	WGS	CGP	1114970277	76671	100	0	0	0	0
795	PD6042a	Breast	WGS	CGP	1648613147	2837913	100	PD6042b	WGS	CGP	1068531823	92599	100	0	0	0	0
796	PD6043a	Breast	WGS	CGP	2059543225	3711156	100	PD6043b	WGS	CGP	1054722494	91389	100	0.0264159	0.03311	0	0
797	PD6044a	Breast	WGS	CGP	2251808212	3042422	100	PD6044b	WGS	CGP	1050662003	92849	100	0	0	0	0
798	PD6045a	Breast	WGS	CGP	1294588684	2026669	100	PD6045b	WGS	CGP	1417275547	201012	100	0.00573066	0.0097	0	0
799	PD6046a	Breast	WGS	CGP	1603667512	2137044	100	PD6046b	WGS	CGP	1440813620	115606	100	0	0	0	0
800	PD6047a	Breast	WGS	CGP	1269980311	3578799	100	PD6047b	WGS	CGP	1170157124	96189	100	0.0238338	0.03168	0	0
802	PD6049a	Breast	WGS	CGP	1523970807	2207935	100	PD6049b	WGS	CGP	1026534223	111066	100	0	0	0	0
803	PD6060a	MDS	WXS	CGP	71388585	3382	74	PD6060b	WXS	CGP	61945714	1265	75	0	0	0.00264988	0.00448
804	PD6067a	MDS	WXS	CGP	80136461	3062	74	PD6067b	WXS	CGP	56557970	4632	75	0	0	0	0
805	PD6068a	MDS	WXS	CGP	83493694	2816	74	PD6068b	WXS	CGP	51694538	6173	75	0	0	0.00125984	0.00301
806	PD6076a	MDS	WXS	CGP	88703074	3253	74	PD6076b	WXS	CGP	71599876	6352	75	0.00188147	0.00353	0.0440032	0.05342
807	PD6077a	MDS	WXS	CGP	134515194	4745	75	PD6077b	WXS	CGP	116849151	10167	75	0.00891862	0.01183	0.00327556	0.00513
808	PD6081a	MDS	WXS	CGP	129356459	7835	75	PD6081b	WXS	CGP	112784627	7837	75	0.00825472	0.01131	0.0128721	0.01685
809	PD6100a	MDS	WXS	CGP	78097755	2406	74	PD6100b	WXS	CGP	96945062	10946	75	0.000744325	0.00178	0.00159464	0.00299
810	PD6101a	MDS	WXS	CGP	142974504	19742	75	PD6101b	WXS	CGP	141439052	10979	75	0.00563169	0.00764	0.00177321	0.00287
811	PD6110a	MDS	WXS	CGP	140218366	9116	75	PD6110b	WXS	CGP	112574027	8357	75	0.00238592	0.00404	0.000733003	0.00175
812	PD6111a	MDS	WXS	CGP	133634433	6260	75	PD6111b	WXS	CGP	101118735	2389	75	0	0	0.0162952	0.02175
813	PD6116a	MDS	WXS	CGP	138710708	7233	75	PD6116b	WXS	CGP	104971216	21835	75	0	0	0	0
814	PD6122a	MDS	WXS	CGP	83376998	6757	75	PD6122b	WXS	CGP	77645206	12505	75	0	0	0.000387147	0.00115
815	PD6127a	MDS	WXS	CGP	128890772	18541	75	PD6127b	WXS	CGP	141466152	11299	75	0	0	0	0
816	PD6130a2	MDS	WGS	CGP	1167751866	676393	100	PD6130b	WGS	CGP	986650865	476259	100	0	0	0.00289226	0.00572
817	PD6177a	MDS	WXS	CGP	142833674	9037	75	PD6177b	WXS	CGP	118064099	3157	75	0	0	0.00361936	0.00567
818	PD6188a2	MDS	WXS	CGP	28791201	208	75	PD6188b	WXS	CGP	40907631	202	75	0.00608108	0.01005	0.00488103	0.00826
819	PD6189a2	MDS	WXS	CGP	87047338	1768	75	PD6189b	WXS	CGP	42824003	139	75	0.00542005	0.00816	0.00161031	0.00384
820	PD6190a2	MDS	WXS	CGP	36678299	399	75	PD6190b	WXS	CGP	48500757	211	75	0	0	0.00175234	0.00373
822	PD6194a	MDS	WXS	CGP	97441145	7993	75	PD6194b	WXS	CGP	137663709	6333	75	0.0039852	0.00607	0.00443746	0.00621
823	PD6197a2	MDS	WXS	CGP	89523086	1574	75	PD6197b	WXS	CGP	51470481	351	75	0.0281921	0.03238	0.00504414	0.00817
824	PD6198a2	MDS	WXS	CGP	85238941	2665	75	PD6198b	WXS	CGP	48530415	200	75	0.00361966	0.00559	0.006875	0.01093
825	PD6204a_BGI	Prostate	WGS	CGP	814189718	1732929	100	PD6204b	WGS	CGP	998981977	275878	100	0	0	0	0
826	PD6204a_Illumina	Prostate	WGS	CGP	1065573150	1680340	100	PD6204b	WGS	CGP	1328764891	326980	100	0	0	0	0
827	PD6205a	AML	WGS	CGP	1518860848	1123976	100	PD6205b	WGS	CGP	1459354708	187118	100	0	0	0	0
828	PD6341a	Chondrosarcoma	WXS	CGP	85702324	14250	75	PD6341b	WXS	CGP	81825731	79338	75	0.000512689	0.00152	0	0
829	PD6342a	Chondrosarcoma	WXS	CGP	85818916	13857	75	PD6342b	WXS	CGP	97133304	135935	75	0.00143266	0.00284	0.002481	0.0042
830	PD6343a	Chondrosarcoma	WXS	CGP	93232111	15873	75	PD6343b	WXS	CGP	87451819	15735	75	0.00391448	0.00604	0.000963546	0.00205
831	PD6344a	Chondrosarcoma	WXS	CGP	97630706	23214	75	PD6344b	WXS	CGP	85254850	160876	75	0.00338855	0.0056	0.00422589	0.00672
832	PD6345a	Chondrosarcoma	WXS	CGP	89801029	21128	75	PD6345b	WXS	CGP	90586188	59945	75	0.000787402	0.00168	0	0
835	PD6349a	Chondrosarcoma	WXS	CGP	86403086	10211	75	PD6349b	WXS	CGP	76468854	89197	75	0.00236016	0.00443	0.00106157	0.00253
836	PD6350a	Chondrosarcoma	WXS	CGP	83182600	14296	75	PD6350b	WXS	CGP	84067866	110541	75	0.000436491	0.00129	0	0
837	PD6351a	Chondrosarcoma	WXS	CGP	93888607	27848	75	PD6351b	WXS	CGP	80219420	74828	75	0.00124636	0.00266	0.000440626	0.0013
838	PD6353a	Chondrosarcoma	WXS	CGP	273214791	36489	75	PD6353b	WXS	CGP	237537734	9654	75	0.00395108	0.00514	0.000623377	0.00112
839	PD6354a	Chondrosarcoma	WXS	CGP	94596604	15835	75	PD6354b	WXS	CGP	86737866	74305	75	0	0	0	0
840	PD6355a	Chondrosarcoma	WXS	CGP	91429422	11293	75	PD6355b	WXS	CGP	84230843	19792	75	0.0128041	0.01703	0	0
841	PD6358a	Chondrosarcoma	WXS	CGP	90267507	7421	75	PD6358b	WXS	CGP	82583742	107102	75	0.000991326	0.00236	0	0
842	PD6359a	Chondrosarcoma	WXS	CGP	93793386	46259	75	PD6359b	WXS	CGP	85512279	97561	75	0.00144134	0.0027	0.00323939	0.00525
843	PD6360a	Chondrosarcoma	WXS	CGP	98108277	15463	75	PD6360b	WXS	CGP	85779495	65439	75	0	0	0.00483092	0.00768
844	PD6361a	Chondrosarcoma	WXS	CGP	132530995	41615	75	PD6361b	WXS	CGP	124279911	2228	75	0.00433311	0.00645	0	0
845	PD6362a	Chondrosarcoma	WXS	CGP	129829408	37797	75	PD6362b	WXS	CGP	116954571	183183	75	0	0	0.0115281	0.01489
846	PD6363a	Chondrosarcoma	WXS	CGP	140247920	46985	75	PD6363b	WXS	CGP	116624141	5724	75	0.0466077	0.05247	0	0
847	PD6364a	Chondrosarcoma	WXS	CGP	141372104	23175	75	PD6364b	WXS	CGP	117549098	4139	75	0.000439754	0.00105	0	0
848	PD6365a	Chondrosarcoma	WXS	CGP	136933109	67866	75	PD6365b	WXS	CGP	107978134	117051	75	0.00078911	0.00156	0.0033621	0.00506
849	PD6366a	Chondrosarcoma	WXS	CGP	150902273	26735	75	PD6366b	WXS	CGP	111832773	6546	75	0.0203268	0.0238	0.0247213	0.02927
850	PD6367a	Chondrosarcoma	WXS	CGP	140815169	59677	75	PD6367b	WXS	CGP	108048404	195966	75	0.00370479	0.00537	0.0115444	0.01477
852	PD6370a	Chordoma	WXS	CGP	131012330	54076	75	PD6370b	WXS	CGP	115712255	5744	75	0.00555086	0.00782	0.00613088	0.00863
854	PD6406a	Breast	WGS	CGP	1213934552	1855135	100	PD6406b	WGS	CGP	1067775592	413387	100	0	0	0	0
855	PD6408a	Breast	WGS	CGP	461800444	699469	100	PD6408b	WGS	CGP	1265131128	610371	100	0	0	0	0
856	PD6409a	Breast	WGS	CGP	1434368191	3025394	100	PD6409b	WGS	CGP	1143238068	319721	100	0.000520969	0.00154	0	0
857	PD6410a	Breast	WGS	CGP	1253294285	2249421	100	PD6410b	WGS	CGP	1009724161	282738	100	0	0	0.00126502	0.00374
858	PD6411a	Breast	WGS	CGP	1329773171	2268719	100	PD6411b	WGS	CGP	1197797800	192145	100	0.00190174	0.00405	0	0
859	PD6412a	Breast	WGS	CGP	1590687309	2056909	100	PD6412b	WGS	CGP	1217042548	473199	100	0.000365297	0.00108	0	0
860	PD6413a	Breast	WGS	CGP	1303641464	1469336	100	PD6413b	WGS	CGP	1016617657	422941	100	0	0	0	0
861	PD6414a	Breast	WGS	CGP	1297733721	846374	100	PD6414b	WGS	CGP	1251220618	716047	100	0.000714796	0.00212	0	0
862	PD6415a	Breast	WGS	CGP	1461195412	1580114	100	PD6415b	WGS	CGP	1298396048	575662	100	0	0	0.000660502	0.00195
863	PD6416a	Breast	WGS	CGP	1246411880	1350325	100	PD6416b	WGS	CGP	1233386279	156400	100	0	0	0	0
865	PD6418a	Breast	WGS	CGP	1420188845	2994704	100	PD6418b	WGS	CGP	964026188	1592622	100	0.00406918	0.00689	0.0127024	0.01825
866	PD6422a	Breast	WGS	CGP	1212089195	3156669	100	PD6422b	WGS	CGP	1065377174	1953408	100	0.00118064	0.00282	0.00446286	0.00777
867	PD6440a	Breast	WGS	CGP	215019854	112254	100	PD6440b	WGS	CGP	146823340	199877	100	0	0	-1	-1
869	PD6549a	MPD	WXS	CGP	105257102	2316	75	PD6549b	WXS	CGP	85251047	5065	75	0.00817736	0.01056	0.0525282	0.05947
870	PD6561a	MPD	WXS	CGP	116211153	4645	75	PD6561b	WXS	CGP	92852382	5597	75	0.0065842	0.00883	0.00516596	0.00743
871	PD6562a	MPD	WXS	CGP	106984505	1859	75	PD6562b	WXS	CGP	79037034	2910	75	0.00478334	0.00705	0.00565542	0.00861
872	PD6563a	MPD	WXS	CGP	104747341	2360	75	PD6563b	WXS	CGP	94501051	7382	75	0.0066984	0.00882	0.0179871	0.02171
873	PD6566a	MPD	WXS	CGP	108350275	3628	75	PD6566b	WXS	CGP	90967427	6692	75	0.0450243	0.0516	0.0197893	0.02469
874	PD6568a2	MPD	WXS	CGP	94730704	2488	75	PD6568b	WXS	CGP	88701694	4531	75	0.0912321	0.10098	0.0199601	0.02499
875	PD6573a	MPD	WXS	CGP	115616203	2074	75	PD6573b	WXS	CGP	81014518	9274	75	0.000246124	0.00073	0.00158983	0.00315
876	PD6593a	MPD	WXS	CGP	159118665	5875	75	PD6593b	WXS	CGP	83994869	6405	75	0.00138436	0.00241	0.00847458	0.01238
877	PD6597a	MPD	WXS	CGP	149762644	4653	75	PD6597b	WXS	CGP	70651690	5781	75	0.017773	0.02124	0.0124303	0.01694
878	PD6598a2	MPD	WXS	CGP	86866081	2068	75	PD6598b	WXS	CGP	96900923	3339	75	0.0924574	0.10331	0.0314233	0.03747
879	PD6602a	MPD	WXS	CGP	109782074	3256	75	PD6602b	WXS	CGP	90285616	6734	75	0.00254696	0.00399	0.00450732	0.00659
880	PD6603a2	MPD	WXS	CGP	104767476	2447	75	PD6603b	WXS	CGP	104682235	5432	75	0.0127821	0.01635	0.00217924	0.00369
881	PD6606a	MPD	WXS	CGP	99070313	1869	75	PD6606b	WXS	CGP	80343887	6648	75	0.000256608	0.00076	0.00130762	0.00259
882	PD6620a2	MPD	WXS	CGP	85922854	1767	75	PD6620b	WXS	CGP	97707064	2653	75	0.0275492	0.03366	0.0491971	0.05713
883	PD6626a2	MPD	WXS	CGP	87062708	2071	75	PD6626b	WXS	CGP	95312404	3886	75	0.0254346	0.03101	0.06469	0.07342
884	PD6628a2	MPD	WXS	CGP	63399362	1967	75	PD6628b2	WXS	CGP	102755335	9205	75	0.00135295	0.00268	0.00674433	0.00956
885	PD6637a2	MPD	WXS	CGP	56741653	2482	75	PD6637b2	WXS	CGP	44301384	4148	75	0.014522	0.01925	0.0140296	0.0193
886	PD6647a2	MPD	WXS	CGP	69403421	2806	75	PD6647b2	WXS	CGP	67660782	1052	75	0.00482139	0.00767	0.00469383	0.00746
887	PD6648a2	MPD	WXS	CGP	113899632	2002	75	PD6648b	WXS	CGP	92913021	6614	75	0.096048	0.1093	0.0799071	0.09161
888	PD6650a2	MPD	WXS	CGP	95380577	2630	75	PD6650b2	WXS	CGP	102330248	1913	75	0.00586786	0.00816	0.0105199	0.01366
889	PD6669a	ALL	WGS	CGP	618487651	675063	50	PD6669b	WXS	CGP	130719853	16222	75	0	0	0.00284125	0.00445
890	PD6670a	ALL	WGS	CGP	672798167	570536	50	PD6670b	WXS	CGP	110123355	16229	75	0	0	0	0
891	PD6671a	ALL	WGS	CGP	496293588	507344	50	PD6671b	WXS	CGP	120319162	16065	75	0	0	0.00474518	0.0066
892	PD6672a	ALL	WGS	CGP	551980282	535611	50	PD6672b	WXS	CGP	118127620	21846	75	0	0	0	0
893	PD6673a	ALL	WGS	CGP	517316961	594934	50	PD6673b	WXS	CGP	110539333	10879	75	0	0	0.000519076	0.00124
894	PD6674a	ALL	WGS	CGP	523563189	619187	50	PD6674b	WXS	CGP	115275377	16441	75	0	0	0.000483033	0.00115
895	PD6675a	ALL	WGS	CGP	324735252	314397	50	PD6675b	WXS	CGP	116468813	14618	75	0	0	0	0
896	PD6676a	ALL	WGS	CGP	470818418	320208	50	PD6676b	WXS	CGP	121407958	14392	75	0	0	0.00326753	0.00511
897	PD6677a	ALL	WGS	CGP	407735429	326062	50	PD6677b	WXS	CGP	115513548	18571	75	0	0	0	0
898	PD6679a	ALL	WGS	CGP	417012496	384725	50	PD6679b	WXS	CGP	99611576	14925	75	0	0	0	0
899	PD6680a	ALL	WGS	CGP	440363701	395333	50	PD6680b	WXS	CGP	77526602	10212	75	0	0	0.00252845	0.0044
900	PD6681a	ALL	WGS	CGP	420947381	405858	50	PD6681b	WXS	CGP	77926900	5050	75	0	0	0.00398565	0.00645
901	PD6682a	ALL	WXS	CGP	89364128	19998	75	PD6682b	WXS	CGP	82979832	8968	75	0.000560774	0.00134	0.00176341	0.00317
902	PD6684a	Breast	WGS	CGP	1166558901	1782562	100	PD6684b	WGS	CGP	652616156	564659	100	0.00769046	0.01145	0.00186393	0.00445
903	PD6719a	Breast	WGS	CGP	1188385420	1712732	100	PD6719b	WGS	CGP	4393450220	1799132	50-100	0.00141945	0.00339	0.000219346	0.00065
904	PD6720a	Breast	WGS	CGP	1444120011	1528449	100	PD6720b	WGS	CGP	1054683027	379197	100	0	0	0	0
906	PD6722a	Breast	WGS	CGP	1549992856	1739191	100	PD6722b	WGS	CGP	1704159036	677039	100	0.00262398	0.00492	0	0
908	PD6728a	Breast	WGS	CGP	1769955702	2185314	100	PD6728b	WGS	CGP	1516918744	1849760	100	0.00256946	0.00435	0	0
909	PD6730a2	Breast	WGS	CGP	264072242	481461	100	PD6730b	WGS	CGP	1684365930	2290793	100	0	0	0.00465215	0.0074
910	PD6732a	Breast	WGS	CGP	1395969239	884805	100	PD6732b	WGS	CGP	1343987571	2342797	100	0	0	0	0
911	PD6733a	Breast	WGS	CGP	1186998768	1686804	100	PD6733b	WGS	CGP	1580599586	1777846	100	0.00523104	0.00864	0	0
912	PD6744a	Chondrosarcoma	WXS	CGP	95246195	13826	75	PD6744b	WXS	CGP	80540282	2544	75	0.000297841	0.00088	0.00154351	0.00306
913	PD6745a	Chondrosarcoma	WXS	CGP	92387155	22955	75	PD6745b	WXS	CGP	79534436	42102	75	0.00577744	0.00814	0.00934579	0.01253
914	PD6746a	Chondrosarcoma	WXS	CGP	94404683	14578	75	PD6746b	WXS	CGP	82289206	41520	75	0.00514433	0.00752	0.00675676	0.00971
915	PD6747a	Chondrosarcoma	WXS	CGP	94410491	9893	75	PD6747b	WXS	CGP	74819550	24156	75	0.00367377	0.00553	0.0214619	0.0265
916	PD6748a	Chondrosarcoma	WXS	CGP	87932663	18026	75	PD6748b	WXS	CGP	73017868	32149	75	0.00549262	0.00818	0.00802195	0.01162
917	PD6749a	Chondrosarcoma	WXS	CGP	97978808	19710	75	PD6749b	WXS	CGP	79684425	30629	75	0	0	0.000717231	0.00171
918	PD6750a	Chondrosarcoma	WXS	CGP	65742663	15712	75	PD6750b	WXS	CGP	77013647	26084	75	0.00106933	0.00228	0.0037062	0.00589
919	PD6751a	Chondrosarcoma	WXS	CGP	78825665	12018	75	PD6751b	WXS	CGP	84300327	2176	75	0.00251953	0.00473	0	0
920	PD6752a	Chondrosarcoma	WXS	CGP	70221164	16591	75	PD6752b	WXS	CGP	82379078	24901	75	0.0211701	0.02674	0.000627353	0.0015
921	PD6753a	Chondrosarcoma	WXS	CGP	78391296	18572	75	PD6753b	WXS	CGP	84854228	62107	75	0.00893326	0.01317	0.0116305	0.01609
922	PD6754a	Chondrosarcoma	WXS	CGP	96668790	22144	75	PD6754b	WXS	CGP	80635852	4980	75	0	0	0.000520359	0.00124
923	PD6755a	Chondrosarcoma	WXS	CGP	79676959	8203	75	PD6755b	WXS	CGP	80877566	25007	75	0.0169126	0.02153	0.00511836	0.00762
924	PD6756a	Chondrosarcoma	WXS	CGP	89720830	12318	75	PD6756b	WXS	CGP	77722461	2413	75	0.0152654	0.01891	0.0271493	0.03238
925	PD6757a	Chondrosarcoma	WXS	CGP	76287455	11138	75	PD6757b	WXS	CGP	84975389	5463	75	0.0100042	0.01326	0.00725058	0.01009
926	PD6759a	Chondrosarcoma	WXS	CGP	90764998	17587	75	PD6759b	WXS	CGP	74759458	68971	75	0.035647	0.04189	0.00170242	0.00319
927	PD6760a	Chondrosarcoma	WXS	CGP	88913429	9020	75	PD6760b	WXS	CGP	77086820	15855	75	0.0378065	0.04477	0.00420875	0.00681
928	PD6761a	Chondrosarcoma	WXS	CGP	142641893	27818	75	PD6761b	WXS	CGP	136517272	38097	75	0.0429155	0.04821	0.00376364	0.00541
929	PD6762a	Chondrosarcoma	WXS	CGP	123332861	44418	75	PD6762b	WXS	CGP	130778233	4838	75	0.0556916	0.06367	0.0018123	0.00315
930	PD6763a	Chondrosarcoma	WXS	CGP	91962865	13704	75	PD6763b	WXS	CGP	73149939	48003	75	0.00449564	0.0067	0.0235085	0.02915
932	PD6765a	Chondrosarcoma	WXS	CGP	79897292	45603	75	PD6765b	WXS	CGP	74683669	2595	75	0.0129804	0.01709	0.0158491	0.02062
933	PD6767a	Chondrosarcoma	WXS	CGP	121035724	19807	75	PD6767b	WXS	CGP	125696901	2624	75	0.00194477	0.00315	0.00462428	0.00647
934	PD6804a2	MDS	WGS	CGP	1140149749	307313	100	PD6804b	WGS	CGP	1073173005	776812	100	0.000752445	0.00223	0	0
936	PD6877a	MDS	WXS	CGP	79219964	3848	74	PD6877b	WXS	CGP	65765814	6196	75	0.00151515	0.00284	0	0
937	PD6921a	MDS	WXS	CGP	75859327	2249	75	PD6921b	WXS	CGP	52852765	914	75	0.00585284	0.00891	0.00154879	0.0033
938	PD6997a	MDS	WXS	CGP	142580726	11955	75	PD6997b	WXS	CGP	104681694	7108	75	0	0	0.0159811	0.01998
939	PD7066a	Breast	WGS	CGP	1630852907	1951157	100	PD7066b	WGS	CGP	1605956332	252545	100	0	0	0	0
940	PD7067a	Breast	WGS	CGP	1309110021	1064924	100	PD7067b	WGS	CGP	1453529436	571766	100	0	0	0	0
941	PD7068a	Breast	WGS	CGP	1512017923	892499	100	PD7068b	WGS	CGP	1055843479	231199	100	0.000443459	0.00131	0	0
942	PD7069a	Breast	WGS	CGP	1537799461	2586832	100	PD7069b	WGS	CGP	1732624206	633195	100	0.000501756	0.00149	0.00134439	0.00287
943	PD7080a	MDS	WXS	CGP	127733897	22806	75	PD7080b	WXS	CGP	119187743	9297	75	0	0	0.0012147	0.00219
944	PD7081a	MDS	WXS	CGP	127643881	6348	75	PD7081b	WXS	CGP	126581292	21138	75	0	0	0.000370782	0.00088
945	PD7084a	MDS	WXS	CGP	152326941	7698	75	PD7084b	WXS	CGP	134950618	17992	75	0.0019073	0.00309	0.0024778	0.00388
946	PD7089a	MDS	WXS	CGP	144331076	13184	75	PD7089b	WXS	CGP	121460836	5146	75	0.00185099	0.003	0	0
947	PD7092a	MDS	WXS	CGP	88178174	28791	75	PD7092b	WXS	CGP	69429558	2642	75	0.00415734	0.00641	0.00781759	0.01142
948	PD7103a	MDS	WXS	CGP	144727339	12499	75	PD7103b	WXS	CGP	134147646	24368	75	0.00170231	0.00288	0.00130321	0.00235
949	PD7107a	MDS	WXS	CGP	150837636	3991	75	PD7107b	WXS	CGP	129034861	7775	75	0.00110471	0.00192	0.000821862	0.00163
950	PD7115a	MDS	WXS	CGP	57318098	397	75	PD7115b	WXS	CGP	70374287	2640	75	0	0	0.000806452	0.00192
951	PD7116a	MDS	WXS	CGP	95425821	16564	75	PD7116b2	WGS	CGP	941246899	429206	100	0	0	0.00168421	0.00402
952	PD7117a	MDS	WXS	CGP	128752227	12557	75	PD7117b	WXS	CGP	147271146	6175	75	0.000864803	0.00184	0.00221484	0.00359
953	PD7118a	MDS	WXS	CGP	111728812	5807	75	PD7118b	WXS	CGP	132866969	6401	75	0	0	0	0
954	PD7120a	MDS	WXS	CGP	159457776	3626	75	PD7120b	WXS	CGP	121919974	3860	75	0.00263257	0.00401	0.00264085	0.00413
955	PD7121a	MDS	WXS	CGP	153108460	13434	75	PD7121b	WXS	CGP	118131353	5643	75	0.00577789	0.00772	0	0
956	PD7123a	Adenoid cystic ca.	WXS	CGP	84720277	24828	75	PD7123b	WXS	CGP	54723289	9366	75	0.00443459	0.00733	0.000626174	0.00185
957	PD7124a	Adenoid cystic ca.	WXS	CGP	101269249	64036	75	PD7124b	WXS	CGP	65969679	5210	75	0.00456552	0.00687	0.0306608	0.03705
958	PD7125a	Adenoid cystic ca.	WXS	CGP	136606798	26331	75	PD7125b	WXS	CGP	125565773	19329	75	0.0112654	0.01462	0.00136869	0.00271
959	PD7126a	Adenoid cystic ca.	WXS	CGP	132175487	34877	75	PD7126b	WXS	CGP	106012097	24465	75	0.012884	0.01573	0.00629987	0.00855
960	PD7127a	Adenoid cystic ca.	WXS	CGP	131844291	29633	75	PD7127b	WXS	CGP	90383557	45358	75	0.00869565	0.01097	0.000773495	0.00165
961	PD7128a	Adenoid cystic ca.	WXS	CGP	68239856	4101	75	PD7128b	WXS	CGP	111496732	38539	75	0.00205832	0.0037	0.0035308	0.00516
962	PD7129a	Adenoid cystic ca.	WXS	CGP	85713649	4967	75	PD7129b	WXS	CGP	136685155	16640	75	0.00846185	0.01143	0.00748071	0.00959
963	PD7130a	Adenoid cystic ca.	WXS	CGP	123873437	29987	75	PD7130b	WXS	CGP	117472057	17815	75	0.0165081	0.02	0.0143749	0.01797
964	PD7131a	Adenoid cystic ca.	WXS	CGP	86159498	21316	75	PD7131b	WXS	CGP	61310424	6908	75	0.00400678	0.00618	0.00783182	0.01135
965	PD7133a	Adenoid cystic ca.	WXS	CGP	76955041	2467	75	PD7133b	WXS	CGP	61644123	7266	75	0.00499465	0.00761	0.00288531	0.00519
966	PD7134a	Adenoid cystic ca.	WXS	CGP	95222067	33247	75	PD7134b	WXS	CGP	100239814	24168	75	0.00436345	0.00644	0	0
967	PD7135a	Adenoid cystic ca.	WXS	CGP	95760079	16895	75	PD7135b	WXS	CGP	114632004	24583	75	0.00402034	0.00593	0.00820734	0.01081
968	PD7136a	Adenoid cystic ca.	WXS	CGP	89354958	3802	75	PD7136b	WXS	CGP	58713679	8674	75	0.00879121	0.01174	0.00680408	0.01003
969	PD7137a	Adenoid cystic ca.	WXS	CGP	56877884	7220	75	PD7137b	WXS	CGP	56750295	8553	75	0	0	0.00463499	0.0075
970	PD7138a	Adenoid cystic ca.	WXS	CGP	73994391	3297	75	PD7138b	WXS	CGP	64188415	14799	75	0.00929821	0.01327	0.00162162	0.00346
971	PD7139a	Adenoid cystic ca.	WXS	CGP	57691661	6211	75	PD7139b	WXS	CGP	50543872	9183	75	0.00952165	0.01358	0.00412736	0.00718
972	PD7140a	Adenoid cystic ca.	WXS	CGP	78740369	4123	75	PD7140b	WXS	CGP	57625622	8006	75	0.00260163	0.0044	0.00493052	0.00784
973	PD7141a	Adenoid cystic ca.	WXS	CGP	63537549	9100	75	PD7141b	WXS	CGP	53488692	4794	75	0.0143567	0.01885	0.00699759	0.01042
974	PD7142a	Adenoid cystic ca.	WXS	CGP	55604689	6648	75	PD7142b	WXS	CGP	109218918	16835	75	0.00270783	0.00508	0.00568105	0.00811
975	PD7143a	Adenoid cystic ca.	WXS	CGP	61080896	7576	75	PD7143b	WXS	CGP	61529409	17881	75	0.000674423	0.00161	0.0170794	0.02179
976	PD7144a	Adenoid cystic ca.	WXS	CGP	98581163	18798	75	PD7144b	WXS	CGP	50714882	7671	75	0.00585509	0.00819	0.00630609	0.00973
977	PD7145a	Adenoid cystic ca.	WXS	CGP	76135237	4249	75	PD7145b	WXS	CGP	54104679	4908	75	0.00489249	0.00709	0	0
978	PD7148a	MDS	WXS	CGP	143068174	10256	75	PD7148b	WXS	CGP	139513537	18509	75	0.00298235	0.00436	0.0127428	0.01548
979	PD7149a	MDS	WXS	CGP	158944641	17122	75	PD7149b	WXS	CGP	146156442	29294	75	0.0145515	0.01758	0.0128248	0.01568
980	PD7150a	MDS	WXS	CGP	144429864	6362	75	PD7150b	WXS	CGP	110546341	9774	75	0.00830788	0.01109	0.004111	0.00626
981	PD7151a	MDS	WXS	CGP	172688883	22701	75	PD7151b	WXS	CGP	126596570	15239	75	0.0046729	0.00618	0.00163345	0.00265
982	PD7152a	MDS	WXS	CGP	98299420	12287	75	PD7152b	WXS	CGP	50495370	1822	75	0.0106675	0.0143	0.00689485	0.0105
983	PD7153a	MDS	WXS	CGP	168929405	16159	75	PD7153b	WXS	CGP	79809947	16120	75	0.00762507	0.00995	0.0509388	0.05883
984	PD7154a	MDS	WXS	CGP	132254148	11166	75	PD7154b	WXS	CGP	43726068	3161	75	0.00042252	0.00101	0.0158259	0.02355
985	PD7155a	MDS	WXS	CGP	145008878	48515	75	PD7155b	WXS	CGP	96391787	10258	75	0.00391535	0.00559	0.0672299	0.0767
986	PD7156a	MDS	WXS	CGP	140422708	26327	75	PD7156b	WXS	CGP	96124763	10403	75	0.00077235	0.00153	0.00185161	0.00322
987	PD7157a	MDS	WXS	CGP	143941420	20497	75	PD7157b	WXS	CGP	110420677	9332	75	0	0	0.000564653	0.00135
988	PD7158a	MDS	WXS	CGP	150920607	17499	75	PD7158b	WXS	CGP	105065262	12295	75	0	0	0.000569368	0.00121
989	PD7159a	MDS	WXS	CGP	117522569	14748	75	PD7159b	WXS	CGP	173396739	13012	75	0	0	0.00399508	0.00553
990	PD7160a	MDS	WXS	CGP	137095747	17794	75	PD7160b	WXS	CGP	106548084	10566	75	0.00386598	0.00582	0.00631001	0.00888
991	PD7161a	MDS	WXS	CGP	140229758	18792	75	PD7161b	WXS	CGP	114962813	19904	75	0.00462525	0.00656	0	0
992	PD7162a	MDS	WXS	CGP	84285665	10880	75	PD7162b	WXS	CGP	54176710	10746	75	0.0107731	0.01438	0.00684736	0.01071
993	PD7163a	MDS	WXS	CGP	130675458	24065	75	PD7163b	WXS	CGP	45099084	7916	75	0	0	0	0
994	PD7164a	MDS	WXS	CGP	152319215	22579	75	PD7164b	WXS	CGP	58558409	1398	75	0.00562984	0.00771	0.0029129	0.00546
995	PD7165a	MDS	WXS	CGP	152518473	25136	75	PD7165b	WXS	CGP	100464263	8702	75	0.00593715	0.00809	0.000296428	0.00088
996	PD7166a	MDS	WXS	CGP	145148657	30948	75	PD7166b	WXS	CGP	108006613	9830	75	0.00452758	0.00656	0.00154512	0.0029
998	PD7168a	MDS	WXS	CGP	152560617	17826	75	PD7168b	WXS	CGP	118272543	21591	75	0.00367918	0.00529	0.0316387	0.03675
999	PD7173a	MPD	WXS	CGP	217389065	13214	75	PD7173b	WXS	CGP	243853409	37414	75	0	0	0.00357297	0.00487
1001	PD7180a	Multiple myeloma	WXS	CGP	127977086	85397	75	PD7180b	WXS	CGP	107982709	3139	75	0.0295005	0.03562	0.0335035	0.03926
1002	PD7181a	Multiple myeloma	WXS	CGP	91873634	2691	75	PD7181b	WXS	CGP	133300710	6185	75	0.00137457	0.00258	0.00036137	0.00086
1003	PD7183a	Chordoma	WXS	CGP	62633144	15746	75	PD7183b	WXS	CGP	49991300	939	75	0.0489251	0.05844	0.00205479	0.00438
1004	PD7184a	Chordoma	WXS	CGP	59067350	11253	75	PD7184b	WXS	CGP	43261557	855	75	0.00850547	0.01214	0.0114395	0.01671
1005	PD7185a	Chordoma	WXS	CGP	65143848	15968	75	PD7185b	WXS	CGP	44848667	1153	75	0.000393159	0.00116	0.0187118	0.02587
1006	PD7186a	Chordoma	WXS	CGP	62845869	7059	75	PD7186b	WXS	CGP	43525645	18923	75	0.00296187	0.00501	0.0352216	0.04406
1008	PD7188a	Osteosarcoma	WGS	CGP	1429752996	1717198	100	PD7188b	WGS	CGP	1086867600	2029759	100	0.00421053	0.00696	0	0
1009	PD7189a	Osteosarcoma	WGS	CGP	2097782540	2176363	100	PD7189b	WGS	CGP	1342483494	5112027	100	0.017237	0.02132	0	0
1010	PD7190a	Osteosarcoma	WGS	CGP	2013260794	2100611	100	PD7190b	WGS	CGP	1210455540	4588527	100	0.00170707	0.0032	0	0
1011	PD7191a	Osteosarcoma	WGS	CGP	2033157738	1927507	100	PD7191b	WGS	CGP	975426528	5225551	100	0.0095732	0.01269	0	0
1012	PD7192a	Osteosarcoma	WGS	CGP	1864343083	2709661	100	PD7192b	WGS	CGP	1091552733	5331792	100	0.000878542	0.0021	0	0
1013	PD7193a	Osteosarcoma	WGS	CGP	1142346635	1525519	100	PD7193b	WGS	CGP	1363435021	513801	100	0.0188951	0.02433	0	0
1015	PD7195a	Osteosarcoma	WGS	CGP	1283069114	2626302	100	PD7195b	WGS	CGP	958477547	293116	100	0.00128866	0.00307	0.00101112	0.00299
1016	PD7196a	Osteosarcoma	WGS	CGP	1698840072	1719863	100	PD7196b	WGS	CGP	891152897	396014	100	0.00454228	0.00701	0	0
1017	PD7197a	Osteosarcoma	WGS	CGP	1229997504	809155	100	PD7197b	WGS	CGP	1492833763	837257	100	0.00283956	0.00511	0	0
1018	PD7199a	Breast	WGS	CGP	1253298025	1261897	100	PD7199b	WGS	CGP	873019340	600342	100	0	0	0	0
1019	PD7201a	Breast	WGS	CGP	1265729975	1485041	100	PD7201b	WGS	CGP	1102562120	685990	100	0	0	0.000629327	0.00186
1023	PD7206a	Breast	WGS	CGP	1114636085	2013763	100	PD7206b	WGS	CGP	1373556056	174486	100	0.000558815	0.00165	0	0
1024	PD7207a	Breast	WGS	CGP	1174775473	1244574	100	PD7207b	WGS	CGP	1244749399	172363	100	0.0126697	0.01807	0	0
1025	PD7208a	Breast	WGS	CGP	1129123114	1537620	100	PD7208b	WGS	CGP	1009571925	227033	100	0.000708717	0.0021	0	0
1026	PD7209a	Breast	WGS	CGP	1308748968	2314288	100	PD7209b	WGS	CGP	1060238189	146613	100	0.00358331	0.00624	0	0
1027	PD7210a	Breast	WGS	CGP	1247033894	2195677	100	PD7210b	WGS	CGP	1012652449	163229	100	0	0	0	0
1028	PD7211a	Breast	WGS	CGP	1275742165	1964102	100	PD7211b	WGS	CGP	1060522965	162467	100	0.00600929	0.00956	0	0
1029	PD7212a	Breast	WGS	CGP	1421319976	2012496	100	PD7212b	WGS	CGP	1085938841	68229	100	0.0116817	0.01634	0	0
1030	PD7214a	Breast	WGS	CGP	1499961617	1517507	100	PD7214b	WGS	CGP	1287897303	345879	100	0.000451569	0.00134	0.00423168	0.00716
1031	PD7215a	Breast	WGS	CGP	1379137618	2394734	100	PD7215b	WGS	CGP	1450264262	423460	100	0	0	0	0
1032	PD7216a	Breast	WGS	CGP	1458262778	1948270	100	PD7216b	WGS	CGP	1126673828	293965	100	0	0	0	0
1033	PD7217a	Breast	WGS	CGP	1138451101	1204771	100	PD7217b	WGS	CGP	868887609	256382	100	0.00112962	0.00269	0	0
1034	PD7218a	Breast	WGS	CGP	1324699957	2376606	100	PD7218b	WGS	CGP	1025296849	463390	100	0	0	0	0
1035	PD7219a	Breast	WGS	CGP	1399522895	1448141	100	PD7219b	WGS	CGP	910420080	424488	100	0.00154291	0.00305	0.0005997	0.00177
1036	PD7221a	Breast	WGS	CGP	1147826879	1404449	100	PD7221b	WGS	CGP	1141049832	404108	100	0.00165792	0.00353	0	0
1037	PD7222a	MDS	WXS	CGP	108161782	26543	75	PD7222b	WXS	CGP	110828577	55477	75	0.0037062	0.00589	0.00677354	0.0102
1038	PD7223a	MPD	WGS	CGP	404939589	321510	50	PD7223b	WXS	CGP	113725315	13844	75	0	0	0.0543298	0.06181
1039	PD7224a	MPD	WGS	CGP	679186369	729263	50	PD7224b	WXS	CGP	125717780	4722	75	0	0	0.0809302	0.09055
1040	PD7225a	MPD	WGS	CGP	287476159	610899	50	PD7225b	WXS	CGP	126800449	13746	75	0	0	0	0
1041	PD7226a	MPD	WGS	CGP	350118094	291373	50	PD7226b	WXS	CGP	132025731	7055	75	0	0	0.0124224	0.01943
1042	PD7227a	MPD	WGS	CGP	326882071	166369	50	PD7227b	WXS	CGP	103103413	7448	75	0	0	0.00442075	0.00652
1043	PD7237a	Renal	WXS	CGP	88274814	23778	72	PD7237b	WXS	CGP	96955295	50636	72	0	0	0	0
1044	PD7238a	Breast	WGS	CGP	1174201957	3716947	100	PD7238b	WGS	CGP	533719897	242251	100	0.00361337	0.0065	0	0
1045	PD7243a	Breast	WGS	CGP	1196265607	3905374	100	PD7243b	WGS	CGP	638999908	213973	100	0.00346106	0.00602	0.00184162	0.00439
1047	PD7252a	Colorectal	WXS	CGP	96660125	70935	75	PD7252b	WXS	CGP	50671596	60249	75	0.00440893	0.00657	0.00424178	0.00718
1048	PD7253a	Colorectal	WXS	CGP	124717097	39159	75	PD7253b	WXS	CGP	60716338	75080	75	0.0456026	0.05272	0.0470058	0.05766
1049	PD7254a	Colorectal	WXS	CGP	101181814	46001	75	PD7254b	WXS	CGP	73701801	26764	75	0.000725338	0.00155	0.00193517	0.00348
1050	PD7255a	Colorectal	WXS	CGP	97000522	49304	75	PD7255b	WXS	CGP	71529650	37223	75	0.00953699	0.01289	0.00083875	0.002
1051	PD7256a	Colorectal	WXS	CGP	103621036	57893	75	PD7256b	WXS	CGP	75204201	82085	75	0.00380228	0.00551	0.00166782	0.003
1052	PD7257a	Colorectal	WXS	CGP	93537087	52313	75	PD7257b	WXS	CGP	75824295	26919	75	0.0216793	0.027	0.0117567	0.01626
1053	PD7258a	Colorectal	WXS	CGP	99625904	76251	75	PD7258b	WXS	CGP	88833509	73158	75	0.0409596	0.04697	0.00712287	0.00976
1054	PD7259a	Colorectal	WXS	CGP	94433292	73583	75	PD7259b	WXS	CGP	78212971	61870	75	0.00146861	0.00264	0	0
1055	PD7260a	Colorectal	WXS	CGP	94455350	84831	75	PD7260b	WXS	CGP	63490730	35043	75	0.0100212	0.01386	0.0097271	0.01421
1056	PD7261a	Colorectal	WXS	CGP	101270117	43158	75	PD7261b	WXS	CGP	67458360	59428	75	0	0	0.00165289	0.00327
1057	PD7262a	Colorectal	WXS	CGP	95866942	54882	75	PD7262b	WXS	CGP	64739041	37394	75	0.00607261	0.00855	0.0039208	0.00635
1058	PD7263a	Colorectal	WXS	CGP	85820793	11196	75	PD7263b	WXS	CGP	60585815	53348	75	0.0021374	0.00372	0.00343643	0.00582
1059	PD7266a	MPD	WXS	CGP	77807447	2503	75	PD7266b	WXS	CGP	53051740	14774	74	0	0	0.00122662	0.00293
1060	PD7267a	MPD	WXS	CGP	89514193	5239	75	PD7267b	WXS	CGP	73343584	8933	74	0.0010377	0.00221	0.000826276	0.00197
1061	PD7268a	MPD	WXS	CGP	82791285	1451	75	PD7268b	WXS	CGP	76099579	4354	74	0.00702663	0.01018	0.00872448	0.01214
1062	PD7269a	MPD	WXS	CGP	95457695	4267	75	PD7269b	WXS	CGP	60298986	42341	74	0.00153408	0.00267	0.00574609	0.00856
1063	PD7270a	MPD	WXS	CGP	134550032	3430	75	PD7270b	WXS	CGP	72607441	15341	74	0.0113438	0.01442	0.00141869	0.00281
1064	PD7271a	MPD	WXS	CGP	93726975	3206	75	PD7271b	WXS	CGP	104204378	23435	75	0.00377225	0.00562	0.00182553	0.00318
1065	PD7272a	MPD	WXS	CGP	111168478	3109	75	PD7272b	WXS	CGP	88713983	17715	75	0.00531738	0.00792	0.0101437	0.01419
1066	PD7273a	MPD	WXS	CGP	90193935	3066	75	PD7273b	WXS	CGP	71460580	44137	75	0.00420003	0.00626	0.0116013	0.01528
1067	PD7274a	MPD	WXS	CGP	86889878	3262	75	PD7274b	WXS	CGP	96806425	15406	75	0.0138393	0.01869	0.000477555	0.00141
1068	PD7275a	MPD	WXS	CGP	91242109	5030	75	PD7275b	WXS	CGP	117280751	3039	75	0.0517849	0.05949	0.0112528	0.01453
1069	PD7276a	MPD	WXS	CGP	78079555	3721	75	PD7276b	WXS	CGP	78944734	21523	75	0.0363993	0.0426	0.00629802	0.00876
1070	PD7278a	MPD	WXS	CGP	71519869	2060	75	PD7278b	WXS	CGP	76364328	20427	75	0	0	0.000318878	0.00094
1071	PD7279a	MPD	WXS	CGP	66089359	2062	75	PD7279b	WXS	CGP	97611674	12751	75	0.000426439	0.00126	0.0367925	0.0434
1072	PD7280a	MPD	WXS	CGP	73041110	1847	75	PD7280b	WXS	CGP	120926612	28590	75	0.0260531	0.03183	0.00422598	0.00612
1073	PD7281a	MPD	WXS	CGP	71689741	2859	75	PD7281b2	WGS	CGP	1090660804	1340431	100	0.00278087	0.00522	0	0
1074	PD7282a	Adenoid cystic ca.	WXS	CGP	95220111	21625	75	PD7282b	WXS	CGP	96917067	21554	75	0.0103024	0.01327	0.0200357	0.02461
1075	PD7283a	Adenoid cystic ca.	WXS	CGP	117005410	33842	75	PD7283b	WXS	CGP	62097252	8396	75	0.005474	0.00776	0.00526662	0.00824
1076	PD7284a	Adenoid cystic ca.	WXS	CGP	88610061	21571	75	PD7284b	WXS	CGP	126877465	46628	75	0.00980782	0.01296	0.0030456	0.00441
1077	PD7285a	Adenoid cystic ca.	WXS	CGP	128331923	18416	75	PD7285b	WXS	CGP	52696662	20488	75	0.0155493	0.0192	0.0111082	0.01585
1078	PD7286a	Adenoid cystic ca.	WXS	CGP	94555155	10504	75	PD7286b	WXS	CGP	98315078	14770	75	0.00444383	0.00662	0.00689061	0.00944
1079	PD7288a	Adenoid cystic ca.	WXS	CGP	121918014	11208	75	PD7288b	WXS	CGP	99102617	14801	75	0.0033036	0.00497	0.00365249	0.00556
1080	PD7290a	Adenoid cystic ca.	WXS	CGP	94258537	25457	75	PD7290b	WXS	CGP	53731183	6104	75	0.00168719	0.00317	0.0029304	0.00527
1081	PD7291a	Adenoid cystic ca.	WXS	CGP	125925500	15917	75	PD7291b	WXS	CGP	59493306	7790	75	0.00207965	0.00337	0.00311873	0.00543
1082	PD7293a	Adenoid cystic ca.	WXS	CGP	83521816	8776	75	PD7293b	WXS	CGP	73749916	12600	75	0.00127105	0.00252	0.00204012	0.00367
1083	PD7295a	Adenoid cystic ca.	WXS	CGP	73752075	11700	75	PD7295b	WXS	CGP	84584215	15205	75	0.0113337	0.01552	0.0127818	0.01694
1084	PD7296a	Adenoid cystic ca.	WXS	CGP	95594611	19141	75	PD7296b	WXS	CGP	98417695	22696	75	0.00471032	0.00677	0.004456	0.00651
1085	PD7297a	Adenoid cystic ca.	WXS	CGP	71882726	5105	75	PD7297b	WXS	CGP	86817808	19057	75	0.00408998	0.00623	0.00554855	0.00786
1086	PD7298a	Adenoid cystic ca.	WXS	CGP	87891920	10733	75	PD7298b	WXS	CGP	71177172	23613	75	0.00151095	0.00272	0.00157729	0.00296
1087	PD7299a	Chondrosarcoma	WXS	CGP	96551272	10423	75	PD7299b	WXS	CGP	86710144	23464	75	0.00114416	0.00215	0	0
1088	PD7300a	Chondrosarcoma	WXS	CGP	95327809	9869	75	PD7300b	WXS	CGP	103082756	19806	75	0.0021751	0.00391	0	0
1089	PD7301a	Chondrosarcoma	WXS	CGP	74550474	18663	75	PD7301b	WXS	CGP	95897616	10993	75	0.0150557	0.01921	0.00437234	0.00634
1090	PD7302a	Chondrosarcoma	WXS	CGP	71073922	5134	75	PD7302b	WXS	CGP	106918694	36000	75	0.0086858	0.01223	0.00862494	0.01148
1091	PD7303a	Chondrosarcoma	WXS	CGP	87312218	14124	75	PD7303b	WXS	CGP	82572843	2578	75	0.00366905	0.00594	0.0122224	0.01658
1096	PD7316a	Breast	WGS	CGP	1137531877	1743462	100	PD7316b	WGS	CGP	1051497642	67014	100	0	0	0	0
1097	PD7321a	Breast	WGS	CGP	1265952007	1603887	100	PD7321b	WGS	CGP	822046445	117507	100	0.000699056	0.00207	0	0
1098	PD7341a	Breast	WGS	CGP	1302296778	720883	100	PD7341b	WGS	CGP	1027778961	154341	100	0.00256148	0.00481	0.00392157	0.00706
1099	PD7344a	Breast	WGS	CGP	1322555543	1159062	100	PD7344b	WGS	CGP	848208496	181320	100	0.0040282	0.00725	0	0
1100	PD7349a	MPD	WGS	CGP	378377055	197227	50	PD7349b	WXS	CGP	73076463	5088	75	0	0	0.0108666	0.01562
1101	PD7350a	MDS	WXS	CGP	97422552	6002	75	PD7350b	WXS	CGP	67821927	3120	75	0.00180614	0.00299	0.0056046	0.00806
1102	PD7351a	MDS	WXS	CGP	98185342	1879	75	PD7351b	WXS	CGP	79074157	2150	75	0.000259067	0.00077	0	0
1103	PD7352a	MDS	WXS	CGP	88000464	478	75	PD7352b	WXS	CGP	80115533	1516	75	0.00251211	0.00437	0	0
1105	PD7355a	Lung	WGS	CGP	1174549510	3649116	90-100	PD7355b2	WGS	CGP	941554902	300656	100	0.00743282	0.01147	0	0
1107	PD7392a	MPD	WXS	CGP	152225666	8654	75	PD7392b	WXS	CGP	39703176	2172	75	0.00231262	0.00368	0.0530739	0.06632
1108	PD7393a	MPD	WXS	CGP	149202096	4037	75	PD7393b	WXS	CGP	38778304	2672	75	0.00885437	0.01115	0.0367454	0.04694
1109	PD7394a	MPD	WXS	CGP	149276439	4946	75	PD7394b	WXS	CGP	54572962	4036	75	0.00226006	0.0034	0	0
1110	PD7395a	MPD	WXS	CGP	99887533	1627	75	PD7395b	WXS	CGP	95991447	4827	75	0.00536585	0.00761	0.00220446	0.00373
1111	PD7396a	MPD	WXS	CGP	101908482	2005	75	PD7396b	WXS	CGP	94466581	4972	75	0.00451347	0.00666	0.00385642	0.00595
1112	PD7397a	MPD	WXS	CGP	106004086	2733	75	PD7397b	WXS	CGP	99126949	4866	75	0.00261593	0.00416	0.00589064	0.00829
1113	PD7398a	MPD	WXS	CGP	97519379	2312	75	PD7398b	WXS	CGP	90719705	8976	75	0.00142592	0.00268	0.0152517	0.01969
1114	PD7399a	MPD	WXS	CGP	116024383	3483	75	PD7399b	WXS	CGP	93966152	8002	75	0.00423307	0.00624	0.00453446	0.00683
1115	PD7400a	MPD	WXS	CGP	100220562	2504	75	PD7400b	WXS	CGP	87597244	7995	75	0	0	0.000648403	0.00155
1116	PD7401a	Osteosarcoma	WGS	CGP	1316324577	1603278	100	PD7401b	WGS	CGP	1029274893	375822	100	0	0	0	0
1117	PD7404a	Breast	WGS	CGP	1280208387	1950406	100	PD7404b	WGS	CGP	930259784	4745353	100	0	0	0.00217865	0.00464
1118	PD7405a2	Breast	WGS	CGP	1190804006	1839060	100	PD7405b	WGS	CGP	886574076	821030	100	0.0130696	0.01727	0	0
1119	PD7407a	Breast	WGS	CGP	1590382984	1721926	100	PD7407b	WGS	CGP	802855279	679632	100	0	0	0	0
1120	PD7408a	Breast	WGS	CGP	1125011147	1777891	100	PD7408b	WGS	CGP	869848339	826451	100	0	0	0	0
1121	PD7409a	Breast	WGS	CGP	1257602291	1477813	100	PD7409b	WGS	CGP	903513932	437780	100	0	0	0	0
1122	PD7410a	Breast	WGS	CGP	1107688055	1828272	100	PD7410b	WGS	CGP	1155509356	1094754	100	0	0	0.00234283	0.00499
1123	PD7411a	Breast	WXS	CGP	79333518	9769	75	PD7411b	WXS	CGP	83868686	5974	75	0.0101257	0.0138	0.00712251	0.01024
1124	PD7412a	Breast	WXS	CGP	68996140	9623	75	PD7412b	WXS	CGP	78115660	3932	75	0.011476	0.01475	0.00918019	0.01192
1125	PD7413a	Breast	WXS	CGP	88866673	17054	75	PD7413b	WXS	CGP	85854680	7123	75	0.0124378	0.01628	0.00936844	0.01277
1126	PD7414a	Breast	WGS	CGP	1227733851	2415828	100	PD7414b	WGS	CGP	949085995	760152	100	0.000606612	0.0018	0	0
1127	PD7415a	Breast	WXS	CGP	94696769	18216	75	PD7415b	WXS	CGP	70624773	4061	75	0.00277469	0.00449	0.00145773	0.00289
1128	PD7416a	Breast	WGS	CGP	1398682682	1695127	100	PD7416b	WGS	CGP	884300742	560491	100	0.000851064	0.00203	0.000839631	0.00248
1129	PD7418a	Breast	WGS	CGP	1285840562	4491822	100	PD7418b	WGS	CGP	805798492	474352	100	0	0	0	0
1130	PD7419a	Breast	WXS	CGP	97894793	16907	75	PD7419b	WXS	CGP	75217464	4151	75	0.020929	0.02505	0.00819285	0.01134
1131	PD7421a	Breast	WXS	CGP	64626523	5621	75	PD7421b	WXS	CGP	63344809	2981	75	0.00105171	0.00224	0.00217912	0.00409
1132	PD7422a	Breast	WGS	CGP	1129365036	2152668	100	PD7422b	WGS	CGP	876527904	459774	100	0.00183094	0.0039	0	0
1133	PD7423a	Breast	WXS	CGP	65096598	18815	75	PD7423b	WXS	CGP	71797265	4710	75	0.00629195	0.00947	0.0030025	0.00496
1134	PD7424a	Breast	WXS	CGP	56755232	7375	75	PD7424b	WXS	CGP	70303874	3563	75	0.00673134	0.00993	0.0159027	0.01967
1135	PD7425a	Breast	WXS	CGP	88215994	23293	75	PD7425b	WXS	CGP	76507289	5142	75	0.0172798	0.02156	0.00325792	0.00538
1136	PD7426a	Breast	WGS	CGP	1078215235	1384395	100	PD7426b	WGS	CGP	865717276	187453	100	0.00570704	0.00943	0	0
1138	PD7428a	Breast	WGS	CGP	1102504338	2018749	100	PD7428b	WGS	CGP	921010102	333013	100	0.0105673	0.01531	0	0
1139	PD7429a	Breast	WXS	CGP	79951121	8926	75	PD7429b	WXS	CGP	82601748	21453	75	0.00606454	0.00924	0.0037422	0.00618
1140	PD7430a	Breast	WXS	CGP	99402099	17212	75	PD7430b	WXS	CGP	71433149	4342	75	0.0112326	0.01479	0.00295585	0.005
1141	PD7431a	Breast	WGS	CGP	1394385049	1549766	100	PD7431b	WGS	CGP	1047758015	871596	100	0.000435161	0.00129	0.00175029	0.00373
1142	PD7432a	Breast	WXS	CGP	104132664	12879	75	PD7432b	WXS	CGP	76474645	6456	75	0.0110613	0.01403	0.0088991	0.01202
1143	PD7433a	Breast	WGS	CGP	1446203455	2619740	100	PD7433b	WGS	CGP	1056691227	675339	100	0.00240024	0.00475	0	0
1144	PD7434a	Breast	WXS	CGP	107841579	18197	75	PD7434b	WXS	CGP	59533336	4131	75	0.0500733	0.05684	0.00402325	0.00665
1145	PD7435a	Breast	WXS	CGP	75643192	23895	75	PD7435b	WXS	CGP	104436831	27672	75	0.0853132	0.09833	0.00567802	0.00837
1146	PD7436a	MPD	WXS	CGP	91961241	2327	75	PD7436b	WXS	CGP	73804322	3977	75	0.000583601	0.00139	0.00213637	0.00384
1147	PD7437a	MPD	WXS	CGP	108562408	4895	75	PD7437b	WXS	CGP	74778958	3272	75	0.00775047	0.01012	0.0120041	0.01567
1148	PD7438a	MPD	WXS	CGP	119146072	1972	75	PD7438b	WXS	CGP	96159225	3552	75	0.00024024	0.00071	0.00911162	0.01248
1149	PD7439a	MPD	WXS	CGP	116891537	15521	75	PD7439b	WXS	CGP	87627618	9050	75	0.0144532	0.01757	0.00711556	0.00979
1150	PD7440a	MPD	WXS	CGP	117747392	14841	75	PD7440b	WXS	CGP	105625615	9272	75	0.000195332	0.00058	0.0165975	0.02042
1151	PD7441a	MPD	WXS	CGP	108707708	2800	75	PD7441b	WXS	CGP	90464107	2611	75	0.00918912	0.01214	0.00100217	0.00214
1152	PD7442a	MPD	WXS	CGP	118579347	2476	75	PD7442b	WXS	CGP	98853763	5607	75	0.0371139	0.04279	0.0202177	0.02468
1153	PD7443a	MPD	WXS	CGP	128343972	1996	75	PD7443b	WXS	CGP	144869142	10339	75	0	0	0.00301851	0.00437
1154	PD7444a	MPD	WXS	CGP	135270274	1941	75	PD7444b	WXS	CGP	135376984	929	75	0.000488122	0.00104	0.000399202	0.00095
1155	PD7445a	Prostate	WGS	CGP	1870208835	1728689	100	PD7445b	WGS	CGP	1006685258	228373	100	0	0	0	0
1156	PD7446a	Prostate	WGS	CGP	1834505977	1453995	100	PD7446b	WGS	CGP	922722270	314591	100	0	0	0	0
1157	PD7447a	Prostate	WGS	CGP	1705925612	1480421	100	PD7447b	WGS	CGP	1052884178	450565	100	0.000735971	0.00176	0	0
1158	PD7507a	Osteosarcoma	WGS	CGP	1148211180	1840357	100	PD7507b	WGS	CGP	898648440	478384	100	0.0132687	0.01835	0.000796178	0.00236
1159	PD7508a	Osteosarcoma	WGS	CGP	1248671338	1929467	100	PD7508b	WGS	CGP	1084232029	549558	100	0.00185071	0.00394	0.000595593	0.00176
1160	PD7509a	Osteosarcoma	WGS	CGP	1093577632	1362501	100	PD7509b	WGS	CGP	887756948	349934	100	0	0	0	0
1161	PD7510a	Osteosarcoma	WGS	CGP	1270451949	1038172	100	PD7510b	WGS	CGP	852848206	234592	100	0.00127673	0.00305	0	0
1162	PD7511a	Osteosarcoma	WGS	CGP	1279323562	2978153	100	PD7511b	WGS	CGP	913743629	274707	100	0.00658979	0.01031	0	0
1163	PD7512a	Osteosarcoma	WGS	CGP	1101895658	1189992	100	PD7512b	WGS	CGP	814769353	242890	100	0.00195249	0.00416	0	0
1164	PD7513a	Osteosarcoma	WGS	CGP	1381063947	977668	100	PD7513b	WGS	CGP	917003473	242148	100	0.00598265	0.00969	0	0
1165	PD7514a	Osteosarcoma	WGS	CGP	1302373922	2850666	100	PD7514b	WGS	CGP	839270836	7405291	100	0	0	0	0
1166	PD7515a	Osteosarcoma	WGS	CGP	1192068302	1505857	100	PD7515b	WGS	CGP	869928466	386481	100	0.00246305	0.00488	0	0
1167	PD7516a	Osteosarcoma	WGS	CGP	1132657455	1568437	100	PD7516b	WGS	CGP	836691947	177682	100	0	0	0	0
1168	PD7517a	Osteosarcoma	WGS	CGP	1201834237	1627971	100	PD7517b	WGS	CGP	865548651	186249	100	0.00987925	0.01443	0	0
1169	PD7518a	Osteosarcoma	WGS	CGP	1163712733	1510585	100	PD7518b	WGS	CGP	1055958814	277305	100	0.000570939	0.00169	0	0
1170	PD7519a	Osteosarcoma	WGS	CGP	1218193581	2609566	100	PD7519b	WGS	CGP	1000212929	447810	100	0	0	0	0
1171	PD7520a	Osteosarcoma	WGS	CGP	1080045538	1295685	100	PD7520b	WGS	CGP	1007887114	403133	100	0.00121433	0.0029	0	0
1172	PD7521a	Osteosarcoma	WGS	CGP	1240529905	1707722	100	PD7521b	WGS	CGP	1051652094	300312	100	0.00115473	0.00275	0	0
1173	PD7522a	Osteosarcoma	WGS	CGP	1266832150	1458842	100	PD7522b	WGS	CGP	863109779	206580	100	0.00600437	0.00955	0.00141543	0.00338
1174	PD7523a	Osteosarcoma	WGS	CGP	1288706428	2078904	100	PD7523b	WGS	CGP	923046276	386373	100	0	0	0	0
1175	PD7524a	Osteosarcoma	WGS	CGP	1167668414	1507442	100	PD7524b	WGS	CGP	1028096620	299499	100	0	0	0.000626566	0.00185
1176	PD7525a	Osteosarcoma	WGS	CGP	1249869488	2586134	100	PD7525b	WGS	CGP	1180191047	558377	100	0	0	0.00195376	0.00416
1177	PD7526a	Osteosarcoma	WGS	CGP	87924264	120368	100	PD7526b	WGS	CGP	51776622	23751	100	0	0	-1	-1
1178	PD7527a	Osteosarcoma	WGS	CGP	1261929802	1258973	100	PD7527b	WGS	CGP	856071855	335740	100	0.00263435	0.00494	0	0
1179	PD7528a	Osteosarcoma	WGS	CGP	1158983936	1158832	100	PD7528b	WGS	CGP	973539108	406974	100	0	0	0.00130208	0.00311
1180	PD7529a	Osteosarcoma	WGS	CGP	1179447714	894895	100	PD7529b	WGS	CGP	953845641	5310570	100	0.000527983	0.00156	0	0
1181	PD7530a	Osteosarcoma	WGS	CGP	1174239705	2463289	100	PD7530b	WGS	CGP	1122334115	271440	100	0	0	0	0
1182	PD7584a	MDS	WXS	CGP	97331323	2916	75	PD7584b	WXS	CGP	106918874	1652	75	0.0184968	0.02256	0.00301692	0.0046
1183	PD7585a	MDS	WXS	CGP	90452060	1493	75	PD7585b	WXS	CGP	101410291	3821	75	0.00187463	0.00317	0.00346141	0.00521
1184	PD7586a	MDS	WXS	CGP	54381794	824	75	PD7586b	WXS	CGP	93281029	1874	75	0.00725389	0.01105	0.00618412	0.00876
1185	PD7587a	MDS	WXS	CGP	48479208	1366	75	PD7587b	WXS	CGP	97411668	4307	75	0.0151515	0.02132	0.027553	0.03355
1186	PD7588a	MDS	WXS	CGP	55551381	1178	75	PD7588b	WXS	CGP	92831876	3099	75	0	0	0.0142102	0.01844
1187	PD7589a	MDS	WXS	CGP	50012890	1726	75	PD7589b	WXS	CGP	89059012	4518	75	0.00537503	0.00855	0.0441216	0.0508
1188	PD7596a	MDS	WXS	CGP	56126115	927	75	PD7596b	WXS	CGP	84612920	17776	75	0	0	0.00513375	0.00744
1189	PD7597a	MDS	WXS	CGP	117878273	4989	75	PD7597b	WXS	CGP	71350729	3596	75	0.00864074	0.01135	0.00550423	0.00838
1190	PD7598a	MDS	WXS	CGP	80976771	1495	75	PD7598b	WXS	CGP	98842307	7777	75	0.00537634	0.00786	0	0
1191	PD7605a	Colorectal	WXS	CGP	58319101	5873	75	PD7605b	WXS	CGP	45519746	4314	75	0	0	0.000550206	0.00163
1192	PD8595a	Ependymoma	WXS	CGP	53642432	6054	75	PD8595b	WXS	CGP	65575590	2033	75	0.0189798	0.02552	0.0104315	0.01478
1193	PD8596a	Ependymoma	WXS	CGP	77891263	6831	75	PD8596b	WXS	CGP	59998231	2756	75	0.00409521	0.00693	0.00310752	0.00583
1194	PD8597a	Ependymoma	WXS	CGP	82699180	5258	75	PD8597b	WXS	CGP	101410640	3588	75	0.0089271	0.01229	0.0402167	0.04625
1195	PD8598a	Ependymoma	WXS	CGP	100047422	25901	75	PD8598b	WXS	CGP	45996987	1503	75	0.023174	0.02825	0.0033456	0.00628
1196	PD8599a	Ependymoma	WXS	CGP	68293475	12791	75	PD8599b	WXS	CGP	50475265	1608	75	0.0164427	0.02089	0.00611909	0.00944
1197	PD8600a	Ependymoma	WXS	CGP	64781801	5185	75	PD8600b	WXS	CGP	54350576	3935	75	0.00304183	0.00515	0	0
1199	PD8602a	Ependymoma	WXS	CGP	119837003	22908	75	PD8602b	WXS	CGP	88818063	8457	75	0.0386117	0.04415	0.0209638	0.02578
1200	PD8603a	Ependymoma	WXS	CGP	124695981	14014	75	PD8603b	WXS	CGP	102706620	1266	75	0.000792581	0.00149	0	0
1201	PD8604a	Ependymoma	WGS	CGP	1230711402	1710527	100	PD8604b2	WGS	CGP	914516948	398638	100	0	0	0	0
1202	PD8605a	Ependymoma	WXS	CGP	152437030	5804	75	PD8605b	WXS	CGP	137602156	18331	75	0.00204318	0.00308	0.11063	0.11818
1203	PD8607a	Breast	WGS	CGP	1090873943	1227991	100	PD8607b	WGS	CGP	592332232	683636	100	0.000403551	0.00119	0.0107527	0.01682
1204	PD8608a	Breast	WGS	CGP	1137758094	1618664	100	PD8608b	WGS	CGP	574782364	908808	100	0.00203097	0.00402	0	0
1205	PD8609a	Breast	WGS	CGP	1528766044	1916753	100	PD8609b	WGS	CGP	729599725	1036162	100	0.00163399	0.00323	0	0
1206	PD8610a	Breast	WGS	CGP	1095380222	1666210	100	PD8610b	WGS	CGP	610867830	435733	100	0.00369231	0.00664	0.00102197	0.00302
1207	PD8611a	Breast	WGS	CGP	1224560562	1766664	100	PD8611b	WGS	CGP	1133818890	852767	100	0	0	0.000989364	0.00236
1208	PD8618a	Breast	WGS	CGP	1058839383	1201252	100	PD8618b	WGS	CGP	864771257	973147	100	0.000527704	0.00156	0.00134093	0.0032
1209	PD8621a	Breast	WGS	CGP	1553596398	1595743	100	PD8621b	WGS	CGP	795574942	518874	100	0	0	0.00326442	0.00696
1210	PD8622a	Breast	WGS	CGP	1465035808	2353872	100	PD8622b	WGS	CGP	990337877	434876	100	0.000517331	0.00153	0	0
1211	PD8623a	Breast	WGS	CGP	1297496356	1337180	100	PD8623b	WGS	CGP	963953976	937811	100	0.000415887	0.00123	0.00177148	0.00378
1212	PD8624a	MPD	WXS	CGP	97675150	2444	75	PD8624b	WXS	CGP	100967932	3770	75	0.00599661	0.00844	0.0456728	0.05172
1213	PD8625a	MPD	WXS	CGP	97806931	2589	75	PD8625b	WXS	CGP	101544363	6133	75	0.0758676	0.08391	0.00778799	0.01033
1214	PD8626a	MPD	WXS	CGP	87203889	1586	75	PD8626b	WXS	CGP	105955853	4187	75	0.00183542	0.0033	0.00060551	0.00144
1215	PD8627a	MPD	WXS	CGP	96444391	2124	75	PD8627b	WXS	CGP	76767693	2233	75	0.0777633	0.0864	0.00633501	0.00934
1216	PD8628a	MPD	WXS	CGP	92992437	2271	75	PD8628b	WXS	CGP	100982466	9827	75	0.0213957	0.02657	0.00590406	0.00826
1217	PD8629a	MPD	WXS	CGP	88560558	1594	75	PD8629b	WXS	CGP	100729825	4583	75	0.00244466	0.00404	0.000860956	0.0017
1218	PD8630a	MPD	WXS	CGP	96133720	1227	75	PD8630b	WXS	CGP	107083763	5217	75	0.0828345	0.09277	0.000615511	0.00131
1219	PD8631a	MPD	WXS	CGP	86866844	1228	75	PD8631b	WXS	CGP	78523935	2054	75	0.0950774	0.10541	0.0142687	0.01891
1220	PD8632a	MPD	WXS	CGP	92928141	1553	75	PD8632b	WXS	CGP	88516930	1712	75	0	0	0.0521374	0.0587
1221	PD8633a	MPD	WXS	CGP	84602617	1829	75	PD8633b	WXS	CGP	91690775	8098	75	0.0533628	0.0613	0.0650314	0.07462
1222	PD8634a	MPD	WXS	CGP	83021533	1056	75	PD8634b	WXS	CGP	86638327	2981	75	0.0141578	0.01811	0.0565485	0.06441
1223	PD8635a	MPD	WXS	CGP	94831521	2398	75	PD8635b	WXS	CGP	96151112	2639	75	0.0316995	0.03735	0.095941	0.10679
1225	PD8637a	MPD	WXS	CGP	84709904	1639	75	PD8637b	WXS	CGP	102105677	2271	75	0.0695237	0.07779	0.000784211	0.00167
1226	PD8640a	MPD	WXS	CGP	99622305	2710	75	PD8640b	WXS	CGP	99011321	3453	75	0.00501819	0.00721	0.0411384	0.04747
1227	PD8641a	MPD	WXS	CGP	92791420	1916	75	PD8641b	WXS	CGP	80859434	4895	75	0.0843626	0.09287	0.0737568	0.08384
1228	PD8642a	MPD	WXS	CGP	100622046	2427	75	PD8642b	WXS	CGP	92643465	2889	75	0.0976203	0.10744	0.00963542	0.01273
1229	PD8643a	MPD	WXS	CGP	120897772	2506	75	PD8643b	WXS	CGP	111223393	5100	75	0.0160468	0.01944	0.0436525	0.04953
1230	PD8644a	MPD	WXS	CGP	149316717	3329	75	PD8644b	WXS	CGP	138342669	6712	75	0.00949094	0.01229	0	0
1231	PD8733a2	MDS	WXS	CGP	98559589	814	75	PD8733b	WXS	CGP	61066592	239	75	0.00507695	0.00756	0.00722892	0.01539
1232	PD8736a2	MDS	WXS	CGP	87176845	4144	75	PD8736b	WXS	CGP	58232608	155	75	0.010156	0.01322	0.00985525	0.01467
1233	PD8737a2	MDS	WXS	CGP	99028779	1133	75	PD8737b	WXS	CGP	65753243	364	75	0.00233694	0.00372	0	0
1234	PD8738a2	MDS	WXS	CGP	104710665	947	75	PD8738b	WXS	CGP	59015054	448	75	0.00308272	0.0051	0.00626053	0.00966
1235	PD8739a2	MDS	WXS	CGP	94253977	1213	75	PD8739b	WXS	CGP	50180383	322	75	0.00492034	0.00702	0.00298063	0.0059
1237	PD8830a	Breast	WGS	CGP	1115465499	2157838	100	PD8830b	WGS	CGP	843758706	263566	100	0.00213675	0.00401	0.000676133	0.002
1238	PD8832a	Breast	WGS	CGP	1248794707	924613	100	PD8832b	WGS	CGP	992919108	311424	100	0.00110173	0.00235	0	0
1239	PD8834a	Colorectal	WXS	CGP	39632147	14703	75	PD8834b	WXS	CGP	64600932	14130	75	0.0193347	0.0258	0	0
1240	PD8942a	MPD	WXS	CGP	89450365	2320	75	PD8942b2	WXS	CGP	95968448	2469	75	0.00299625	0.00485	0.00201309	0.00362
1241	PD8943a	MPD	WXS	CGP	56321713	1879	75	PD8943b2	WXS	CGP	70984168	1391	75	0.0102063	0.01437	0.00386324	0.00626
1242	PD8944a	MPD	WXS	CGP	64264764	3582	75	PD8944b2	WXS	CGP	81983145	6576	75	0.0228443	0.02908	0.00481571	0.00743
1243	PD8945a	MPD	WXS	CGP	61711886	1962	75	PD8945b2	WXS	CGP	81792926	1913	75	0.00164035	0.00325	0.00166713	0.003
1244	PD8949a2	AMKL	WXS	CGP	64944298	5672	75	PD8949b2	WXS	CGP	28009095	1304	75	0.00321322	0.00559	0	0
1245	PD8950a	AMKL	WXS	CGP	87782920	23165	75	PD8950b	WXS	CGP	12581683	1009	75	0.00116942	0.00232	0	0
1246	PD8952a2	AMKL	WXS	CGP	114325337	1938	75	PD8952b2	WXS	CGP	88478373	2513	75	0	0	0.0025641	0.00408
1247	PD8953a2	AMKL	WXS	CGP	101321892	4192	75	PD8953b2	WXS	CGP	103390057	5361	75	0.000844714	0.0018	0.00271518	0.0044
1248	PD8956a2	AMKL	WXS	CGP	93597218	2518	75	PD8956b2	WXS	CGP	95923148	5926	75	0.00125063	0.00235	0.00837388	0.01107
1249	PD8964a	Breast	WGS	CGP	1125921290	2122257	100	PD8964b	WGS	CGP	805513656	1664928	100	0.00296485	0.00516	0.00758882	0.01207
1250	PD8966a	Breast	WGS	CGP	1177120085	1501190	100	PD8966b	WGS	CGP	838466357	1699584	100	0.00348635	0.00576	0.0367776	0.05236
1251	PD8969a	Breast	WGS	CGP	1176116015	1236277	100	PD8969b	WGS	CGP	883284580	119568	100	0.00113186	0.0027	0.000857265	0.00254
1252	PD8973a	Breast	WGS	CGP	1422883986	1346036	100	PD8973b	WGS	CGP	1039710767	680319	100	0	0	0	0
1253	PD8978a	Breast	WGS	CGP	1190774643	3196947	100	PD8978b	WGS	CGP	557864439	1013747	100	0.0121719	0.01638	0	0
1254	PD8979a	Breast	WGS	CGP	1417479740	1882250	100	PD8979b	WGS	CGP	615631292	419285	100	0.00128178	0.00273	0.00481928	0.00904
1255	PD8980a	Breast	WGS	CGP	1407518282	2481147	100	PD8980b	WGS	CGP	602815579	571193	100	0.0106195	0.01486	0.0205687	0.0303
1256	PD8981a	Breast	WGS	CGP	1261493711	1589248	100	PD8981b	WGS	CGP	624790282	464856	100	0	0	0.00181818	0.00434
1257	PD8993a	MPD	WXS	CGP	95701655	1874	75	PD8993b	WXS	CGP	102999431	11135	75	0.0100584	0.01329	0.0104381	0.01375
1262	PD8999a	Breast	WGS	CGP	231386852	641889	100	PD8999b	WGS	CGP	829717329	75134	100	0	0	0	0
1263	PD9000a	Breast	WGS	CGP	1191077313	1791457	100	PD9000b	WGS	CGP	1236417580	146295	100	0.007724	0.01163	0.00340426	0.00613
1264	PD9001a	Breast	WGS	CGP	1311343083	2353085	100	PD9001b	WGS	CGP	849380833	84157	100	0	0	0	0
1265	PD9002a	Breast	WGS	CGP	1427822338	3530910	100	PD9002b	WGS	CGP	830097336	77588	100	0.012571	0.01698	0	0
1266	PD9004a	Breast	WGS	CGP	130088598	556989	100	PD9004b	WGS	CGP	664885206	66366	100	0	0	0.0026087	0.00556
1267	PD9024a	Melanoma	WXS	CGP	71046925	29280	75	PD9024b	WXS	CGP	47439901	7958	75	0.0117664	0.0154	0.00816882	0.01278
1268	PD9025a	Melanoma	WXS	CGP	73089419	18048	75	PD9025b	WXS	CGP	58397822	5929	75	0.00514414	0.0072	0.0325815	0.03922
1269	PD9026a	Melanoma	WXS	CGP	65640548	7864	75	PD9026b	WXS	CGP	45569971	2782	75	0.00763255	0.01045	0.00985222	0.01427
1270	PD9027a	Melanoma	WXS	CGP	72692047	42423	75	PD9027b	WXS	CGP	62213193	4739	75	0.00731436	0.0103	0.00466835	0.00731
1271	PD9028a	Melanoma	WXS	CGP	63730156	16178	75	PD9028b	WXS	CGP	63282590	3673	75	0.00259885	0.00452	0.00508788	0.00809
1272	PD9029a	Melanoma	WXS	CGP	54363550	17872	75	PD9029b	WXS	CGP	46081950	2912	75	0	0	0.00234412	0.0044
1273	PD9030a	Melanoma	WXS	CGP	73530400	38904	75	PD9030b	WXS	CGP	75975390	4406	75	0.000489356	0.00117	0.00625293	0.00899
1274	PD9031a	Melanoma	WXS	CGP	78754309	83263	75	PD9031b	WXS	CGP	40429079	6398	75	0.00491228	0.00701	0.0307692	0.03884
1275	PD9032a	Melanoma	WXS	CGP	108231752	50985	75	PD9032b	WXS	CGP	62940304	2477	75	0.00577687	0.00808	0.00165837	0.00328
1276	PD9033a	Melanoma	WXS	CGP	71742570	8588	75	PD9033b	WXS	CGP	63016439	3960	75	0	0	0	0
1277	PD9052a	Osteosarcoma	WXS	CGP	72431550	18796	75	PD9052b	WXS	CGP	28243281	3863	75	0.0183384	0.02274	0.0182492	0.02454
1278	PD9053a	Osteosarcoma	WXS	CGP	86496970	47382	75	PD9053b	WXS	CGP	84746910	4862	75	0.00359184	0.00571	0.00143575	0.00269
1279	PD9054a	Osteosarcoma	WXS	CGP	81051969	20814	75	PD9054b	WXS	CGP	63652226	3687	75	0.004	0.00636	0.0014417	0.00285
1280	PD9055a	Osteosarcoma	WXS	CGP	62203946	14188	75	PD9055b	WXS	CGP	31708734	5321	75	0.00642183	0.00956	0.00903091	0.01393
1281	PD9056a	Osteosarcoma	WGS	CGP	1103074986	1210228	100	PD9056b	WGS	CGP	952971083	241141	100	0.0115911	0.01642	0	0
1282	PD9061a	Colorectal	WXS	CGP	88149141	16007	75	PD9061b	WXS	CGP	25926253	2500	75	0.00247289	0.00382	0.00528402	0.01046
1283	PD9168a	Prostate	WGS	CGP	1539143115	1174841	90	PD9168b	WGS	CGP	924757504	197482	90	0.00552251	0.00852	0	0
1284	PD9169a	Prostate	WGS	CGP	1653717681	1834027	90	PD9169b	WGS	CGP	958424787	339500	90	0.00295082	0.00488	0	0
1285	PD9170a	Prostate	WGS	CGP	1566360994	2991722	90	PD9170b	WGS	CGP	1048411178	268152	90	0	0	0	0
1286	PD9171a	Prostate	WGS	CGP	1689353807	3049485	90	PD9171b	WGS	CGP	1040119211	637092	90	0	0	0	0
1287	PD9172a	MDS	WGS	CGP	1092295390	1824081	100	PD9172b	WGS	CGP	590586163	628394	100	0	0	0.00488202	0.0104
1288	PD9193a	Breast	WGS	CGP	1249352222	1981654	100	PD9193b	WGS	CGP	946561615	1242982	100	0	0	0	0
1289	PD9194a	Breast	WGS	CGP	1574570571	1497830	100	PD9194b	WGS	CGP	710438682	508541	100	0	0	0	0
1290	PD9195a	Breast	WGS	CGP	1227277268	2279839	100	PD9195b	WGS	CGP	1061830114	579005	100	0	0	0	0
1291	PD9196a	Colorectal	WXS	CGP	84165249	29959	75	PD9196b	WXS	CGP	10794639	622	75	0.00414938	0.00632	0.00498753	0.01475
1292	PD9398a	Osteosarcoma	WXS	CGP	64792422	32292	75	PD9398b	WXS	CGP	38994596	5124	75	0.00286174	0.00484	0	0
1293	PD9409a	MPD	WXS	CGP	66176752	947	75	PD9409b2	WXS	CGP	72165128	2810	75	0	0	0.00353045	0.00572
1294	PD9410a	MPD	WXS	CGP	61787411	1079	75	PD9410b2	WXS	CGP	71938315	1609	75	0.0010917	0.0026	0.00691857	0.01067
1295	PD9411a	MPD	WXS	CGP	65501056	1666	75	PD9411b2	WXS	CGP	71570948	5873	75	0.00157315	0.00335	0.00390911	0.00662
1296	PD9412a	MPD	WXS	CGP	61039665	1142	75	PD9412b2	WXS	CGP	70643788	1453	75	0.000451569	0.00134	0.00465608	0.0074
1297	PD9415a	MPD	WXS	CGP	66869673	805	75	PD9415b2	WXS	CGP	82325786	1952	75	0.00577478	0.00869	0.00790774	0.01107
1298	PD9416a	MPD	WXS	CGP	71010483	1348	75	PD9416b2	WXS	CGP	81263752	5344	75	0.00729483	0.01066	0.00899612	0.01275
1299	PD9417a	MPD	WXS	CGP	68055667	639	75	PD9417b2	WXS	CGP	81760967	3834	75	0.00212794	0.0036	0.0117631	0.01531
1300	PD9418a	MPD	WXS	CGP	62986959	1941	75	PD9418b2	WXS	CGP	77551300	9145	75	0.00439131	0.00726	0.0107477	0.01513
1301	PD9419a	MPD	WXS	CGP	62256603	2270	75	PD9419b2	WXS	CGP	70412005	2102	75	0.00474496	0.00723	0.00984476	0.01362
1302	PD9420a	MPD	WXS	CGP	57429299	1411	75	PD9420b2	WXS	CGP	77259908	3704	75	0.0044027	0.00663	0.0101425	0.0134
1303	PD9423a	MPD	WXS	CGP	60060441	951	75	PD9423b2	WXS	CGP	77530076	4976	75	0.0038579	0.00604	0.0048852	0.00735
1304	PD9476a	MPD	WGS	CGP	1405836211	454923	100	PD9476b	WGS	CGP	1002910385	69309	100	0	0	0.000685166	0.00203
1305	PD9478a	MPD	WGS	CGP	1276453835	207827	100	PD9478b	WGS	CGP	1148900231	623841	100	0	0	0	0
1306	PD9479a	MPD	WGS	CGP	1318313036	431863	100	PD9479b	WGS	CGP	1023822123	706015	100	0	0	0	0
1307	PD9539a	Breast	WGS	CGP	742530074	893596	100	PD9539b	WGS	CGP	528869916	184896	100	0.00937082	0.01427	0	0
1308	PD9541a	Breast	WGS	CGP	795685371	1397299	100	PD9541b	WGS	CGP	391886029	153735	100	0.00299401	0.00593	0	0
1309	PD9544a	Breast	WGS	CGP	772409317	1017273	100	PD9544b	WGS	CGP	649723581	296426	100	0	0	0	0
1310	PD9567a	Breast	WGS	CGP	1325589316	1880089	100	PD9567b	WGS	CGP	1047354038	104618	100	0.00397263	0.00657	0.000577868	0.00171
1311	PD9568a	Breast	WGS	CGP	1125709865	2060052	100	PD9568b	WGS	CGP	1068930018	137051	100	0.015978	0.02177	0	0
1312	PD9569a	Breast	WGS	CGP	1512269780	2800411	100	PD9569b	WGS	CGP	1079664011	81788	100	0	0	0	0
1313	PD9570a	Breast	WGS	CGP	1341285290	2633475	100	PD9570b	WGS	CGP	1076099597	91232	100	0	0	0	0
1314	PD9571a	Breast	WGS	CGP	1327701234	3679447	100	PD9571b	WGS	CGP	1104862565	128126	100	0.0169036	0.02188	0.00121951	0.00291
1315	PD9572a	Breast	WGS	CGP	1328578685	2156052	100	PD9572b	WGS	CGP	1102720595	102956	100	0	0	0	0
1316	PD9573a	Breast	WGS	CGP	1502235271	1670918	100	PD9573b	WGS	CGP	1040543425	91428	100	0.00703812	0.01028	0	0
1317	PD9574a	Breast	WGS	CGP	1116038057	1796875	100	PD9574b	WGS	CGP	1069611111	146969	100	0.00589812	0.00938	0.000622084	0.00184
1318	PD9575a	Breast	WGS	CGP	1317852149	2552658	100	PD9575b	WGS	CGP	867827624	90490	100	0	0	0	0
1319	PD9577a	Breast	WGS	CGP	2222024850	4602156	100	PD9577b	WGS	CGP	1418022256	1866938	100	0	0	0.00662115	0.00986
1320	PD9582a	Breast	WGS	CGP	1592839939	1799297	100	PD9582b	WGS	CGP	1486073431	2035888	100	0.000274198	0.00081	0	0
1321	PD9589a	Breast	WGS	CGP	1250000655	1630994	100	PD9589b	WGS	CGP	817740950	1164137	100	0	0	0.000732601	0.00217
1322	PD9592a	Breast	WGS	CGP	1593627172	2766706	100	PD9592b	WGS	CGP	1032938777	1032526	100	0.000328569	0.00097	0	0
1323	PD9593a	Breast	WGS	CGP	1081666189	1438890	100	PD9593b	WGS	CGP	596127184	502766	100	0.000559284	0.00166	0	0
1324	PD9595a	Breast	WGS	CGP	1212975388	1284071	100	PD9595b	WGS	CGP	958698416	811574	100	0.00510465	0.00826	0	0
1325	PD9596a	Breast	WGS	CGP	239292431	338917	100	PD9596b	WGS	CGP	315521658	316909	100	0	0	0.00297177	0.00879
1326	PD9597a	Breast	WGS	CGP	1031017522	1220463	100	PD9597b	WGS	CGP	611826473	370004	100	0.00124961	0.00298	0	0
1327	PD9599a	Breast	WGS	CGP	1403233501	1572767	100	PD9599b	WGS	CGP	557033286	509220	100	0.00577145	0.00869	0	0
1328	PD9604a	Breast	WGS	CGP	1131688254	3210502	100	PD9604b	WGS	CGP	1121478080	903265	100	0	0	0.00483676	0.00818
1329	PD9605a	Breast	WGS	CGP	1227546453	1289110	100	PD9605b	WGS	CGP	527595601	506120	100	0	0	0.00461894	0.00914
1330	PD9664a	Ewing sarcoma	WXS	CGP	95023197	15698	75	PD9664b	WXS	CGP	140979415	3074	75	0.00203874	0.00345	0.00110314	0.00199
1331	PD9665a	Ewing sarcoma	WXS	CGP	172093774	20208	75	PD9665b	WXS	CGP	144228119	3753	75	0.0139674	0.0164	0.0151956	0.0179
1332	PD9666a	Ewing sarcoma	WXS	CGP	143453811	24073	75	PD9666b	WXS	CGP	103820365	5805	75	0.00551042	0.00724	0.000632811	0.00151
1334	PD9668a	Ewing sarcoma	WXS	CGP	44882961	8927	75	PD9668b	WXS	CGP	126072683	4549	75	0.00592417	0.00959	0.0105585	0.01282
1335	PD9669a	Ewing sarcoma	WXS	CGP	121699951	17078	75	PD9669b	WXS	CGP	130083015	4011	75	0.0064417	0.00801	0.00321888	0.00432
1336	PD9670a	Ewing sarcoma	WXS	CGP	185279198	19747	75	PD9670b	WXS	CGP	72712860	3174	75	0.00415326	0.00544	0.00634006	0.00899
1337	PD9671a	Ewing sarcoma	WXS	CGP	87961064	7476	75	PD9671b	WXS	CGP	123433141	3427	75	0.00108944	0.00204	0.00289374	0.00387
1338	PD9672a	Ewing sarcoma	WXS	CGP	68023132	14482	75	PD9672b	WXS	CGP	67097202	2620	75	0.00195531	0.0034	0.00438436	0.00641
1339	PD9673a	Ewing sarcoma	WXS	CGP	46430938	4073	75	PD9673b	WXS	CGP	76538923	5420	75	0	0	0.00379651	0.00572
1340	PD9674a	Ewing sarcoma	WXS	CGP	91591219	16208	75	PD9674b	WXS	CGP	130536420	7310	75	0.00161594	0.00291	0.00327225	0.00455
1341	PD9675a	Ewing sarcoma	WXS	CGP	21594672	4191	75	PD9675b	WXS	CGP	139936511	5022	75	0	0	0.00378233	0.00511
1342	PD9676a	Ewing sarcoma	WXS	CGP	85619243	10177	75	PD9676b	WXS	CGP	124589947	1305	75	0.0185486	0.02334	0.0104484	0.01286
1343	PD9677a	Ewing sarcoma	WXS	CGP	107095345	7428	75	PD9677b	WXS	CGP	144448690	3461	75	0.00705339	0.00962	0.00207814	0.00313
1344	PD9678a	Ewing sarcoma	WXS	CGP	63191730	8464	75	PD9678b	WXS	CGP	127039224	2057	75	0	0	0.00411933	0.00557
1345	PD9679a	Ewing sarcoma	WXS	CGP	39757099	17898	75	PD9679b	WXS	CGP	75630917	1980	75	0.000740741	0.00219	0.0219298	0.02704
1346	PD9680a	Ewing sarcoma	WXS	CGP	48392741	5987	100	PD9680b	WXS	CGP	77468079	920	75	0.000752304	0.00179	0.00316206	0.00512
1347	PD9681a	Ewing sarcoma	WXS	CGP	34899574	8074	75	PD9681b	WXS	CGP	120840827	8679	75	0.00590745	0.00976	0.0126132	0.01483
1348	PD9682a	Ewing sarcoma	WXS	CGP	57387945	9310	75-100	PD9682b	WXS	CGP	82128421	2775	75	0.00766074	0.01049	0.00148825	0.00259
1349	PD9683a	Ewing sarcoma	WXS	CGP	35381487	4228	75	PD9683b	WXS	CGP	83773170	1400	75	0	0	0.00589029	0.00824
1350	PD9684a	Ewing sarcoma	WXS	CGP	51690461	18979	75-100	PD9684b	WXS	CGP	93403997	9628	75	0.0297223	0.03635	0.00638978	0.00926
1351	PD9685a	Ewing sarcoma	WXS	CGP	52207222	11894	75-100	PD9685b	WXS	CGP	154060359	3237	75	0.00324083	0.00548	0.00952192	0.01172
1352	PD9686a	Ewing sarcoma	WXS	CGP	128674974	11321	75	PD9686b	WXS	CGP	86295038	3257	75	0.00319262	0.0044	0	0
1353	PD9687a	Ewing sarcoma	WXS	CGP	108141139	10314	75	PD9687b	WXS	CGP	79161115	1395	75	0.00107825	0.00188	0	0
1354	PD9688a	Ewing sarcoma	WXS	CGP	107747973	50078	75	PD9688b	WXS	CGP	73949980	3816	75	0.00338696	0.00548	0.00153728	0.00304
1355	PD9689a	Ewing sarcoma	WXS	CGP	105890011	33102	75	PD9689b	WXS	CGP	79599040	3431	75	0.0115607	0.01501	0.0130421	0.01707
1357	PD9691a	Ewing sarcoma	WXS	CGP	77293269	17198	75	PD9691b	WXS	CGP	153544363	8061	75	0.00861225	0.0122	0.00559749	0.0075
1358	PD9692a	Ewing sarcoma	WXS	CGP	109251490	35866	75	PD9692b	WXS	CGP	159480389	3595	75	0.00973349	0.01267	0.0128716	0.01533
1360	PD9696a	Breast	WGS	CGP	1273797484	1126157	100	PD9696b	WGS	CGP	948573309	1011744	100	0	0	0.00169205	0.00404
1361	PD9702a	Breast	WGS	CGP	1230730947	3399773	100	PD9702b	WGS	CGP	1079590997	1315825	100	0.00752823	0.01133	0	0
1362	PD9746a	Prostate	WGS	CGP	1550985005	2154287	90	PD9746b	WGS	CGP	1001808239	1355321	90	0	0	0.00110926	0.00265
1363	PD9749a	Prostate	WGS	CGP	1603611589	3289865	90	PD9749b	WGS	CGP	1009027796	1393193	90	0.000909918	0.00217	0	0
1364	PD9751a	Prostate	WGS	CGP	1643721752	2610948	90	PD9751b	WGS	CGP	943192406	1242155	90	0	0	0.000664011	0.00197
1365	PD9752a	Breast	WGS	CGP	805177059	1711226	100	PD9752b	WGS	CGP	704835951	591128	100	0.00212766	0.00453	0	0
1366	PD9754a	Breast	WGS	CGP	852733396	1589044	100	PD9754b	WGS	CGP	501953081	380863	100	0	0	0	0
1367	PD9755a	Breast	WGS	CGP	952448901	1306830	100	PD9755b	WGS	CGP	553709489	261911	100	0	0	0	0
1368	PD9756a	Breast	WGS	CGP	887113571	816169	100	PD9756b	WGS	CGP	493299766	493680	100	0	0	0.00551344	0.01091
1369	PD9757a	Breast	WGS	CGP	899499106	1162823	100	PD9757b	WGS	CGP	446061027	367040	100	0.000749064	0.00222	0	0
1370	PD9758a	Breast	WGS	CGP	782576502	868515	100	PD9758b	WGS	CGP	429515660	387817	100	0.00345871	0.00685	0.00361337	0.00862
1371	PD9759a	Breast	WGS	CGP	846540756	858971	100	PD9759b	WGS	CGP	488497827	314776	100	0.00242277	0.0048	0.00134228	0.00397
1372	PD9760a	Breast	WGS	CGP	825368098	1687582	100	PD9760b	WGS	CGP	470823262	379148	100	0.00417537	0.00727	0.00119261	0.00353
1373	PD9761a	Breast	WGS	CGP	921493330	1119390	100	PD9761b	WGS	CGP	509927209	457058	100	0	0	0	0
1375	PD9769c	Breast	WGS	CGP	1362872731	4861584	100	PD9769b	WGS	CGP	155779248	386480	100	0	0	0	0
1376	PD9770c	Breast	WGS	CGP	1610713558	2075154	100	PD9770b	WGS	CGP	952480632	572760	100	0	0	0	0
1377	PD9771a	Breast	WGS	CGP	1028141666	965072	100	PD9771b	WGS	CGP	860161116	626461	100	0	0	0	0
1378	PD9772a	Breast	WGS	CGP	137483261	245582	100	PD9772b	WGS	CGP	932560953	1429974	100	0	0	0	0
1379	PD9773a	Breast	WGS	CGP	433987474	411655	100	PD9773b	WGS	CGP	984187263	1003946	100	0.00377715	0.00901	0.0137615	0.01963
1380	PD9774a	Breast	WGS	CGP	461421594	576288	100	PD9774b	WGS	CGP	908960729	714364	100	0	0	0	0
1381	PD9775a	Breast	WGS	CGP	978351171	981180	100	PD9775b	WGS	CGP	922025298	1070085	100	0	0	0	0
1382	PD9776a	Breast	WGS	CGP	1033863466	2399557	100	PD9776b	WGS	CGP	899208132	668573	100	0.00125353	0.00299	0	0
1383	PD9777a	Breast	WGS	CGP	883090457	857979	100	PD9777b	WGS	CGP	836435822	590762	100	0	0	0.0139398	0.02019
1385	PD9843a	Breast	WGS	CGP	1083097027	2389647	100	PD9843b	WGS	CGP	620571003	3022224	100	0.0031211	0.00585	0	0
1386	PD9845a	Breast	WGS	CGP	971329273	4493946	100	PD9845b	WGS	CGP	527572992	1937115	100	0.00902062	0.01374	0	0
1387	PD9847a	Breast	WGS	CGP	1114385461	3550721	100	PD9847b	WGS	CGP	668933631	2949831	100	0	0	0.0147634	0.02176
1388	PD9849a	Breast	WGS	CGP	1020800135	1470370	100	PD9849b	WGS	CGP	754504971	631280	100	0	0	0	0
1389	PD9916a	AML	WXS	CGP	113362276	5289	75	PD9916b	WXS	CGP	135073632	4678	75	0.00325159	0.00509	0.00952592	0.01237
1390	PD9917a	AML	WXS	CGP	106204669	4363	75	PD9917b	WXS	CGP	119963729	5847	75	0.00949244	0.01214	0.00571957	0.00764
1391	PD9920a	AML	WXS	CGP	121859634	2714	75	PD9920b	WXS	CGP	113919896	2904	75	0.00536769	0.00772	0.00565211	0.00813
1392	PD9921a	AML	WXS	CGP	106636051	3801	75	PD9921b	WXS	CGP	113684082	11540	75	0.0039984	0.00602	0.00343854	0.00524
1393	PD9922a	AML	WXS	CGP	127532165	15909	75	PD9922b	WXS	CGP	118586300	3122	75	0.00394945	0.00595	0.0011036	0.00218
1394	PD9923a	AML	WXS	CGP	103402022	4275	75	PD9923b	WXS	CGP	116855446	5373	75	0.0067206	0.00925	0.00746733	0.0099
1395	PD9924a2	Lung	WGS	CGP	186841041	510647	50	PD9924b	WGS	CGP	267389744	76221	100	-1	-1	0	0
1397	PD9927a2	Lung	WGS	CGP	709722527	1180018	50-100	PD9927b	WGS	CGP	534327181	181989	100	0	0	0	0
1398	PD9928a	Lung	WGS	CGP	176709575	281486	100	PD9928b	WGS	CGP	343615221	80532	100	0	0	0	0
1399	PD9933a	AMKL	WXS	CGP	75411704	2909	75	PD9933b	WXS	CGP	143013851	5098	75	0.00220062	0.00396	0	0
1400	PD9965a	Osteosarcoma	WXS	CGP	73610260	76077	75	PD9965b	WXS	CGP	112110694	100884	75	0	0	0.00870024	0.01166
1401	PD9967a	Osteosarcoma	WXS	CGP	63822570	28923	75	PD9967b	WXS	CGP	31346371	2659	75	0.00339367	0.00561	0.00174216	0.00371
1402	PD9968a	Osteosarcoma	WXS	CGP	61873322	27090	75	PD9968b	WXS	CGP	33760794	2031	75	0.00479233	0.0075	0.00892154	0.01315
1403	PD9970a	Osteosarcoma	WXS	CGP	71604670	29132	75	PD9970b	WXS	CGP	75176419	5550	75	0.00913451	0.01313	0.0093439	0.01315
1404	PD9971a	Osteosarcoma	WXS	CGP	77231846	14395	75	PD9971b	WXS	CGP	60887173	2475	75	0.013465	0.01827	0.00540428	0.00834
1405	PD9973a	Osteosarcoma	WXS	CGP	69156163	25284	75	PD9973b	WXS	CGP	55951915	1927	75	0.00283745	0.00494	0.00341048	0.00593
1406	PD9974a	Osteosarcoma	WXS	CGP	71378637	32887	75	PD9974b	WXS	CGP	47458581	3419	75	0.000962001	0.00229	0.0021348	0.00372
1407	PD9978a	Osteosarcoma	WXS	CGP	53806753	26341	75	PD9978b	WXS	CGP	56542381	4944	75	0.0337593	0.0416	0.0135037	0.01849
1408	PD9980a	Osteosarcoma	WXS	CGP	73892696	55359	75	PD9980b	WXS	CGP	117877001	204185	75	0.03125	0.03727	0.00141243	0.00254
1409	PD9981a	Osteosarcoma	WXS	CGP	60119980	21285	75	PD9981b	WXS	CGP	49117149	2900	75	0.00954033	0.01352	0.000564016	0.00167
1410	PD9983a	Osteosarcoma	WXS	CGP	79597185	32379	75	PD9983b	WXS	CGP	59665211	3363	75	0.0150665	0.01919	0.0117241	0.01565
1411	PD9984a	Osteosarcoma	WXS	CGP	51523048	52618	75	PD9984b	WXS	CGP	85773513	5723	75	0.00340384	0.00592	0.000769823	0.00164
1412	PD9985a	Osteosarcoma	WXS	CGP	93185780	40101	75	PD9985b	WXS	CGP	56097836	4542	75	0.00179748	0.00324	0.00823402	0.01193
1413	PD9986a	Osteosarcoma	WXS	CGP	78845789	34387	75	PD9986b	WXS	CGP	87094921	5202	75	0.0027049	0.00507	0	0
1414	PD9989a	Osteosarcoma	WXS	CGP	65280278	21808	75	PD9989b	WXS	CGP	48702373	3852	75	0.0128205	0.01732	0.0121099	0.01675
1415	PD9999a	Osteosarcoma	WXS	CGP	53808233	16126	75	PD9999b	WXS	CGP	51261098	3485	75	0.00393895	0.00667	0.00430519	0.00711
5015	TCGA-23-2647-01A-01D-1526-09	Ovarian	WXS	WUGSC	167041264	14097	100	23-2647-10A	WXS	WUGSC	175937121	2223	100	0.001	0.00281	0	0
5016	TCGA-36-2534-01A-01D-1526-09	Ovarian	WXS	WUGSC	189010441	8988	100	36-2534-10A	WXS	WUGSC	177081867	1940	100	0.0155	0.02144	0	0
5017	TCGA-13-2066-01A-01D-1526-09	Ovarian	WXS	WUGSC	176321682	3844	100	13-2066-10A	WXS	WUGSC	158076958	1016	100	0.0676	0.07869	1e-05	0.00098
5018	TCGA-42-2588-01A-01D-1526-09	Ovarian	WXS	WUGSC	168866818	6191	100	42-2588-10A	WXS	WUGSC	148428625	2381	100	0.00046	0.00254	0	0.0006
5019	TCGA-29-2431-01A-01D-1526-09	Ovarian	WXS	WUGSC	180866810	9571	100	29-2431-10A	WXS	WUGSC	147151615	2604	100	0.01122	0.01678	0.0011	0.00373
5020	TCGA-36-2530-01A-01D-1526-09	Ovarian	WXS	WUGSC	132560697	6787	100	36-2530-10A	WXS	WUGSC	160613549	2664	100	0.00571	0.00995	0.00139	0.00377
5021	TCGA-36-2539-01A-01D-1526-09	Ovarian	WXS	WUGSC	152550009	5180	100	36-2539-10A	WXS	WUGSC	157546574	1840	100	0.0026	0.00565	0.00052	0.00247
5023	TCGA-36-2548-01A-01D-1526-09	Ovarian	WXS	WUGSC	183832936	18139	100	36-2548-10A	WXS	WUGSC	175481759	5268	100	0.01318	0.01822	8e-05	0.00125
5024	TCGA-13-2065-01A-01D-1526-09	Ovarian	WXS	WUGSC	185886177	8063	100	13-2065-10A	WXS	WUGSC	142773147	1242	100	0.00278	0.00579	0	0.00111
5025	TCGA-36-2551-01A-01D-1526-09	Ovarian	WXS	WUGSC	167077514	12291	100	36-2551-10A	WXS	WUGSC	183520660	1670	100	0.02588	0.03289	0.00212	0.00516
5026	TCGA-36-2540-01A-01D-1526-09	Ovarian	WXS	WUGSC	156922787	7682	100	36-2540-10A	WXS	WUGSC	185490918	2566	100	0.00062	0.00263	0	0
5027	TCGA-13-2059-01A-01D-1526-09	Ovarian	WXS	WUGSC	198738398	19240	100	13-2059-10A	WXS	WUGSC	163094282	1577	100	0.00995	0.01398	0.00033	0.00159
5028	TCGA-36-2537-01A-01D-1526-09	Ovarian	WXS	WUGSC	165920315	5161	100	36-2537-10A	WXS	WUGSC	156484930	1006	100	0.00903	0.01506	0.00183	0.00533
5029	TCGA-36-2532-01A-01D-1526-09	Ovarian	WXS	WUGSC	167034218	4112	100	36-2532-10A	WXS	WUGSC	169943138	2782	100	0.01137	0.01643	0	0
5030	TCGA-13-2071-01A-02D-1526-09	Ovarian	WXS	WUGSC	143301829	6436	100	13-2071-10A	WXS	WUGSC	178795005	2723	100	0.00211	0.00501	0	0.0004
5031	TCGA-42-2587-01A-01D-1526-09	Ovarian	WXS	WUGSC	154813281	6011	100	42-2587-10A	WXS	WUGSC	174803316	2595	100	0.00029	0.00196	8e-05	0.00115
5032	TCGA-36-2544-01A-01D-1526-09	Ovarian	WXS	WUGSC	170079803	18487	100	36-2544-10A	WXS	WUGSC	102234151	948	100	0.01105	0.01682	0	0
5033	TCGA-36-2542-01A-01D-1526-09	Ovarian	WXS	WUGSC	131228738	10527	100	36-2542-10A	WXS	WUGSC	200704613	2076	100	0	0.00109	0	0
5034	TCGA-13-2057-01A-02D-1526-09	Ovarian	WXS	WUGSC	151970694	3412	100	13-2057-10A	WXS	WUGSC	203526046	2169	100	0.01715	0.02288	0	0
5035	TCGA-29-2436-01A-01D-1526-09	Ovarian	WXS	WUGSC	154512872	12099	100	29-2436-10A	WXS	WUGSC	185123366	3316	100	0.00015	0.00133	0	0
5036	TCGA-23-2649-01A-01D-1526-09	Ovarian	WXS	WUGSC	161093767	36234	100	23-2649-10A	WXS	WUGSC	189463734	4757	100	0.00681	0.01224	0	0
5037	TCGA-23-2643-01A-01D-1526-09	Ovarian	WXS	WUGSC	164033558	14365	100	23-2643-10A	WXS	WUGSC	178642585	4901	100	0.01449	0.02096	0	0.00086
5038	TCGA-36-2543-01A-01D-1526-09	Ovarian	WXS	WUGSC	176094643	12355	100	36-2543-10A	WXS	WUGSC	169545850	1462	100	0	0	0	0
5039	TCGA-42-2589-01A-01D-1526-09	Ovarian	WXS	WUGSC	139216132	4546	100	42-2589-10A	WXS	WUGSC	196608403	1723	100	0.00897	0.01372	0	0
5040	TCGA-29-2432-01A-01D-1526-09	Ovarian	WXS	WUGSC	194923694	7873	100	29-2432-10A	WXS	WUGSC	142492128	1560	100	0.00301	0.0062	0	0
5041	TCGA-29-2429-01A-01D-1526-09	Ovarian	WXS	WUGSC	154399181	7540	100	29-2429-10A	WXS	WUGSC	144749192	281	100	0.00271	0.00566	0.00011	0.00165
5042	TCGA-42-2593-01A-01D-1764-09	Ovarian	WXS	WUGSC	206387817	12277	100	42-2593-10A	WXS	WUGSC	213838628	3718	100	0.00579	0.00979	0.0001	0.00147
5043	TCGA-36-2533-01A-01D-1526-09	Ovarian	WXS	WUGSC	174704582	3601	100	36-2533-10A	WXS	WUGSC	132974903	4016	100	0.00641	0.01056	0	0
5044	TCGA-42-2582-01A-01D-1526-09	Ovarian	WXS	WUGSC	132964308	5176	100	42-2582-10A	WXS	WUGSC	218010386	3977	100	0.00192	0.00506	0.00057	0.00223
5045	TCGA-13-2061-01A-01D-1526-09	Ovarian	WXS	WUGSC	169680718	7676	100	13-2061-10A	WXS	WUGSC	163624232	1929	100	0.01016	0.01566	9e-05	0.00143
5046	TCGA-59-2372-01A-01D-1526-09	Ovarian	WXS	WUGSC	159660664	11027	100	59-2372-10A	WXS	WUGSC	196552834	1595	100	0.01141	0.01666	0	0
5047	TCGA-36-2547-01A-01D-1526-09	Ovarian	WXS	WUGSC	186969299	9807	100	36-2547-10A	WXS	WUGSC	176941250	1165	100	0.00908	0.01396	0.00392	0.00719
5048	TCGA-36-2552-01A-01D-1526-09	Ovarian	WXS	WUGSC	138355530	8280	100	36-2552-10A	WXS	WUGSC	100882697	1096	100	0.00272	0.0056	0	0
5049	TCGA-29-2434-01A-01D-1526-09	Ovarian	WXS	WUGSC	172793360	9371	100	29-2434-10A	WXS	WUGSC	160438792	2939	100	0.02616	0.03283	0.00219	0.00533
5050	TCGA-36-2538-01A-01D-1526-09	Ovarian	WXS	WUGSC	151410565	6069	100	36-2538-10A	WXS	WUGSC	160500863	1201	100	0.00265	0.00595	0.00073	0.00284
5051	TCGA-23-2641-01A-01D-1526-09	Ovarian	WXS	WUGSC	131645539	9776	100	23-2641-10A	WXS	WUGSC	161581665	11601	100	0.01553	0.0227	0.00174	0.0049
5052	TCGA-42-2591-01A-01D-1526-09	Ovarian	WXS	WUGSC	131882572	4733	100	42-2591-10A	WXS	WUGSC	171689612	1306	100	0.02457	0.03182	0.00024	0.00161
5053	TCGA-36-2545-01A-01D-1526-09	Ovarian	WXS	WUGSC	185348921	14104	100	36-2545-10A	WXS	WUGSC	160472797	1865	100	0.00286	0.00589	0	0.00073
5054	TCGA-EB-A24C-01A-11D-A18Y-02	Melanoma	WGS	HMS-RK	267566937	161719	51	EB-A24C-10A	WGS	HMS-RK	349647267	187011	51	0	0.19514	0.00269	0.14017
5056	TCGA-EB-A24D-01A-11D-A18Y-02	Melanoma	WGS	HMS-RK	276216612	170718	51	EB-A24D-10A	WGS	HMS-RK	433732570	262130	51	0	0.0863	0.00098	0.06798
5057	TCGA-BF-A1PU-01A-11D-A18Z-02	Melanoma	WGS	HMS-RK	252066022	78009	51	BF-A1PU-10A	WGS	HMS-RK	305554184	174328	51	0	0	0	0
5058	TCGA-D9-A1X3-01A-11D-A18Y-02	Melanoma	WGS	HMS-RK	193330790	128391	51	D9-A1X3-10A	WGS	HMS-RK	164193364	66084	51	0	0	-1	-1
5059	TCGA-BF-A1PX-01A-12D-A18Z-02	Melanoma	WGS	HMS-RK	437869356	154755	51	BF-A1PX-10A	WGS	HMS-RK	264926437	133715	51	0	0	0	0
5060	TCGA-BF-A1PV-01A-11D-A18Z-02	Melanoma	WGS	HMS-RK	237393708	205286	51	BF-A1PV-10A	WGS	HMS-RK	224173316	105857	51	0	0.09061	0	0
5062	TCGA-HR-A2OH-01A-11D-A18Y-02	Melanoma	WGS	HMS-RK	313804075	75630	47-51	HR-A2OH-10A	WGS	HMS-RK	334425744	116017	47-51	0	0	0	0
5063	TCGA-BF-A1PZ-01A-11D-A18Z-02	Melanoma	WGS	HMS-RK	281134734	87367	51	BF-A1PZ-10A	WGS	HMS-RK	340484694	206130	51	0	0	0	0
5064	TCGA-GF-A2C7-01A-11D-A18Y-02	Melanoma	WGS	HMS-RK	280309438	156421	51	GF-A2C7-10A	WGS	HMS-RK	257879963	156688	51	0	0	0	0.20179
5066	TCGA-ER-A19T-01A-11D-A18Z-02	Melanoma	WGS	HMS-RK	280815996	190066	51	ER-A19T-10A	WGS	HMS-RK	300965409	139868	51	0	0	0	0
5068	TCGA-EB-A299-01A-21D-A18Y-02	Melanoma	WGS	HMS-RK	272914837	131056	51	EB-A299-10A	WGS	HMS-RK	460433478	198122	51	0	0	0.0151	0.0969
5069	TCGA-ER-A19K-01A-21D-A18Y-02	Melanoma	WGS	HMS-RK	367705653	365892	51	ER-A19K-10A	WGS	HMS-RK	390887601	170913	51	0	0.03902	0	0
5071	TCGA-ER-A2NF-01A-11D-A18Z-02	Melanoma	WGS	HMS-RK	290485333	271004	51	ER-A2NF-10A	WGS	HMS-RK	371059161	232286	51	0	0	0	0
5072	TCGA-DD-A1EG-01A-11D-A20W-10	Hepatocellular	WXS	BCM	105606075	3831	101	DD-A1EG-10A	WXS	BCM	78065952	3053	101	0.00946	0.01517	0.00042	0.00279
5073	TCGA-G3-A25U-01A-11D-A16V-10	Hepatocellular	WXS	BCM	101753465	22350	100	G3-A25U-10A	WXS	BCM	96249257	33077	100	0.00372	0.01009	0.0025	0.008
5074	TCGA-EP-A3RK-01A-11D-A22F-10	Hepatocellular	WXS	BCM	69342519	4893	101	EP-A3RK-10A	WXS	BCM	67290944	1585	101	0	0	0	0
5075	TCGA-DD-A11B-01A-11D-A12Z-10	Hepatocellular	WXS	BCM	123391457	49608	100	DD-A11B-10A	WXS	BCM	208242058	12419	100	0.0034	0.00846	0.00039	0.00217
5076	TCGA-G3-A3CI-01A-11D-A20W-10	Hepatocellular	WXS	BCM	65494495	4411	101	G3-A3CI-10A	WXS	BCM	97271554	3539	101	0.00055	0.00371	0.00067	0.00283
5077	TCGA-CC-A3M9-01A-11D-A20W-10	Hepatocellular	WXS	BCM	81822591	2194	101	CC-A3M9-10A	WXS	BCM	93357148	3296	101	0.00057	0.00313	0.00011	0.00168
5078	TCGA-DD-A1EK-01A-11D-A20W-10	Hepatocellular	WXS	BCM	86704359	2360	101	DD-A1EK-10A	WXS	BCM	99273113	1762	101	0.00467	0.00973	0.0014	0.00426
5079	TCGA-CC-5260-01A-01D-A12Z-10	Hepatocellular	WXS	BCM	211797163	24856	100	CC-5260-10B	WXS	BCM	188957667	31362	100	0	0.00046	1e-05	0.00123
5080	TCGA-CC-5258-01A-01D-A12Z-10	Hepatocellular	WXS	BCM	205005700	41188	100	CC-5258-10A	WXS	BCM	188308694	24230	100	0.00205	0.00511	0.00067	0.00317
5081	TCGA-EP-A3JL-01A-11D-A20W-10	Hepatocellular	WXS	BCM	80157095	29828	101	EP-A3JL-10A	WXS	BCM	94125211	2259	101	0.00028	0.00252	0.0001	0.00146
5082	TCGA-BC-A3KG-01A-11D-A20W-10	Hepatocellular	WXS	BCM	106116619	1422	101	BC-A3KG-10A	WXS	BCM	108229858	3153	101	0.01082	0.01706	0.00486	0.00938
5083	TCGA-G3-A3CK-01A-11D-A20W-10	Hepatocellular	WXS	BCM	109899170	8761	101	G3-A3CK-10A	WXS	BCM	103711184	2651	101	0.00149	0.00391	0.00027	0.00183
5084	TCGA-G3-A25S-01A-11D-A16V-10	Hepatocellular	WXS	BCM	105157732	73917	100	G3-A25S-10A	WXS	BCM	114673521	39449	100	0.01126	0.01952	0.00237	0.0072
5085	TCGA-DD-A1EF-01A-11D-A12Z-10	Hepatocellular	WXS	BCM	159941046	29959	100	DD-A1EF-10A	WXS	BCM	104079470	8059	100	0.00456	0.00939	0	0
5086	TCGA-BC-A217-01A-11D-A152-10	Hepatocellular	WXS	BCM	202094104	28651	100	BC-A217-10A	WXS	BCM	232118119	97284	100	0.00297	0.00724	0.00034	0.0023
5087	TCGA-CC-5264-01A-01D-A12Z-10	Hepatocellular	WXS	BCM	247302094	22041	100	CC-5264-10A	WXS	BCM	165517239	22144	100	0.01048	0.01556	0.00309	0.00735
5088	TCGA-CC-5263-01A-01D-A12Z-10	Hepatocellular	WXS	BCM	240248123	57098	100	CC-5263-10B	WXS	BCM	190630497	31773	100	0	0	0	0.00099
5090	TCGA-EP-A12J-01A-11D-A12Z-10	Hepatocellular	WXS	BCM	211584504	39755	100	EP-A12J-10A	WXS	BCM	99565795	4404	100	0.00283	0.0066	0	0.00323
5091	TCGA-EP-A26S-01A-11D-A16V-10	Hepatocellular	WXS	BCM	105055975	67323	100	EP-A26S-10A	WXS	BCM	115914872	24119	100	0.00314	0.00916	0.00496	0.01155
5092	TCGA-CC-A3MB-01A-11D-A20W-10	Hepatocellular	WXS	BCM	76449034	2304	101	CC-A3MB-10A	WXS	BCM	83868694	2718	101	0.00955	0.0156	0.00025	0.00222
5093	TCGA-G3-A3CJ-01A-11D-A20W-10	Hepatocellular	WXS	BCM	113954963	9867	101	G3-A3CJ-10A	WXS	BCM	139321050	5217	101	0.00517	0.00937	0.00101	0.00294
5094	TCGA-CC-A1HT-01A-11D-A12Z-10	Hepatocellular	WXS	BCM	220132317	38043	100	CC-A1HT-10A	WXS	BCM	213502525	36476	100	0	0.00044	0.00026	0.00177
5095	TCGA-DD-A113-01A-11D-A12Z-10	Hepatocellular	WXS	BCM	251417432	75075	100	DD-A113-10A	WXS	BCM	224489307	16911	100	0.0021	0.00458	0.00107	0.00325
5096	TCGA-DD-A11A-01A-11D-A12Z-10	Hepatocellular	WXS	BCM	125834011	38075	100	DD-A11A-10A	WXS	BCM	115617966	8029	100	0.02632	0.03618	0	0
5097	TCGA-CC-5261-01A-01D-A12Z-10	Hepatocellular	WXS	BCM	197727125	28714	100	CC-5261-10A	WXS	BCM	187829686	20709	100	0.03663	0.04663	0.04526	0.05752
5098	TCGA-DD-A119-01A-11D-A12Z-10	Hepatocellular	WXS	BCM	178756392	53672	100	DD-A119-10A	WXS	BCM	208589292	36367	100	0	0	0	0.00091
5099	TCGA-DD-A116-01A-11D-A12Z-10	Hepatocellular	WXS	BCM	224370091	44047	100	DD-A116-10A	WXS	BCM	112302557	22627	100	0	0	0	0
5100	TCGA-DD-A1EB-01A-11D-A12Z-10	Hepatocellular	WXS	BCM	199908578	69547	100	DD-A1EB-10A	WXS	BCM	104214186	16027	100	0.01394	0.02014	0	0.00272
5101	TCGA-BC-4073-01B-02D-A12Z-10	Hepatocellular	WXS	BCM	139485014	20664	100	BC-4073-10A	WXS	BCM	141543209	23494	100	0.00038	0.00254	0.00239	0.00628
5102	TCGA-DD-A114-01A-11D-A12Z-10	Hepatocellular	WXS	BCM	271309282	39428	100	DD-A114-10A	WXS	BCM	256133899	23652	100	0.00072	0.0026	0.00089	0.003
5103	TCGA-CC-A3MA-01A-11D-A20W-10	Hepatocellular	WXS	BCM	88734358	3966	101	CC-A3MA-10A	WXS	BCM	92148743	1646	101	0.0009	0.0035	2e-05	0.00155
5104	TCGA-DD-A1EL-01A-11D-A152-10	Hepatocellular	WXS	BCM	179999246	78665	100	DD-A1EL-10A	WXS	BCM	238500947	49637	100	0.00974	0.0161	0.00244	0.00568
5105	TCGA-EP-A2KB-01A-11D-A183-10	Hepatocellular	WXS	BCM	129345725	16880	100	EP-A2KB-10A	WXS	BCM	128229116	3334	101	0.01355	0.01968	0.00322	0.00712
5106	TCGA-G3-A25V-01A-11D-A16V-10	Hepatocellular	WXS	BCM	104431171	81991	100	G3-A25V-10A	WXS	BCM	99405373	42441	100	0.00018	0.00273	0	0
5107	TCGA-CC-A123-01A-11D-A12Z-10	Hepatocellular	WXS	BCM	177677255	47314	100	CC-A123-10A	WXS	BCM	159183404	25589	100	0.00047	0.00222	0	0.00094
5108	TCGA-DD-A1ED-01A-11D-A152-10	Hepatocellular	WXS	BCM	151528868	130955	100	DD-A1ED-10A	WXS	BCM	224629260	28330	100	0.00316	0.00788	0.00401	0.00761
5109	TCGA-FV-A2QQ-01A-11D-A22F-10	Hepatocellular	WXS	BCM	82097701	6645	101	FV-A2QQ-10B	WXS	BCM	76432027	2475	101	0.0004	0.00356	0	0
5110	TCGA-EP-A2KA-01A-11D-A183-10	Hepatocellular	WXS	BCM	119771310	8265	100	EP-A2KA-10A	WXS	BCM	138940962	5734	101	0.00063	0.003	0.00227	0.00553
5111	TCGA-G3-A25Y-01A-11D-A16V-10	Hepatocellular	WXS	BCM	115399493	31555	100	G3-A25Y-10A	WXS	BCM	98159784	25235	100	0	0	0	0.00156
5112	TCGA-BC-A3KF-01A-11D-A20W-10	Hepatocellular	WXS	BCM	72609957	1326	101	BC-A3KF-10A	WXS	BCM	59972662	2095	101	0.00057	0.00313	0	0.00134
5113	TCGA-DD-A1EA-01A-11D-A12Z-10	Hepatocellular	WXS	BCM	189113885	50906	100	DD-A1EA-10A	WXS	BCM	118256348	20628	100	0.00262	0.00624	0	0.0013
5114	TCGA-G3-A3CG-01A-11D-A20W-10	Hepatocellular	WXS	BCM	84320920	4011	101	G3-A3CG-10A	WXS	BCM	84499983	1005	101	0	0	0.0017	0.00544
5115	TCGA-CC-5262-01A-01D-A12Z-10	Hepatocellular	WXS	BCM	268337814	76234	100	CC-5262-10B	WXS	BCM	236832605	74872	100	0	0.00037	0	0
5116	TCGA-G3-A25T-01A-11D-A16V-10	Hepatocellular	WXS	BCM	102520858	48311	100	G3-A25T-10A	WXS	BCM	90674534	27782	100	0.00348	0.0111	0.00327	0.00994
5117	TCGA-FV-A3R3-01A-11D-A22F-10	Hepatocellular	WXS	BCM	69292568	2551	101	FV-A3R3-10A	WXS	BCM	77253622	3680	101	0.00076	0.0042	0.00017	0.00256
5118	TCGA-DD-A1EH-01A-11D-A12Z-10	Hepatocellular	WXS	BCM	184784002	27167	100	DD-A1EH-10A	WXS	BCM	100139566	4591	100	0.00227	0.00479	0	0.00106
5119	TCGA-DD-A115-01A-11D-A12Z-10	Hepatocellular	WXS	BCM	178403555	51212	100	DD-A115-10A	WXS	BCM	236510421	13933	100	0	0.0012	0	0
5120	TCGA-AP-A054-01A-11D-A043-02	Uterine	WGS	HMS-RK	183724333	65567	51	AP-A054-10A	WXS	WUGSC	115570691	23706	100	0.00199	0.11395	0	0
5121	TCGA-BG-A186-01A-11D-A12F-02	Uterine	WGS	HMS-RK	218430629	236048	51	BG-A186-10A	WXS	WUGSC	150892144	17695	100	0	0	0	0.00126
5122	TCGA-D1-A16R-01A-11D-A12F-02	Uterine	WGS	HMS-RK	378788504	239423	51	D1-A16R-10A	WXS	WUGSC	224495377	16219	100	0	0.02548	0	0
5124	TCGA-BG-A0MU-01A-11D-A101-02	Uterine	WGS	HMS-RK	261200299	55252	51	BG-A0MU-10A	WXS	WUGSC	106862879	28535	100	0	0.1412	0	0.00061
5125	TCGA-A5-A0GR-01A-11D-A122-09	Uterine	WXS	WUGSC	193559176	40044	100	A5-A0GR-10A	WXS	WUGSC	176529317	17322	100	0.06222	0.07502	0.00095	0.0032
5126	TCGA-A5-A0GQ-01A-11D-A122-09	Uterine	WXS	WUGSC	181649591	11792	100	A5-A0GQ-10A	WXS	WUGSC	196650163	16312	100	0	0	0.00018	0.00161
5127	TCGA-D1-A161-01A-11D-A122-09	Uterine	WXS	WUGSC	154245044	22171	100	D1-A161-10A	WXS	WUGSC	180436076	5573	100	0.00826	0.01384	0.00192	0.00456
5128	TCGA-E6-A1LZ-01A-11D-A142-09	Uterine	WXS	WUGSC	136598807	151131	100	E6-A1LZ-10A	WXS	WUGSC	113373955	14974	100	0.00212	0.00901	0.00142	0.00782
5129	TCGA-BS-A0U5-01A-11D-A10G-09	Uterine	WXS	WUGSC	114332451	12298	100	BS-A0U5-10A	WXS	WUGSC	99847245	11852	100	0.00056	0.0031	0	0
5130	TCGA-D1-A1NU-01A-11D-A14G-09	Uterine	WXS	WUGSC	117622947	39443	100	D1-A1NU-10A	WXS	WUGSC	111959208	13462	100	0.00557	0.01421	0	0.00221
5131	TCGA-BS-A0UF-01A-11D-A10B-09	Uterine	WXS	WUGSC	102046029	11725	100	BS-A0UF-10A	WXS	WUGSC	95582231	8061	100	0	0	0	0
5132	TCGA-B5-A11X-01A-11D-A10M-09	Uterine	WXS	WUGSC	120651857	5245	100	B5-A11X-10A	WXS	WUGSC	128378300	18909	100	0.00089	0.00344	0.00022	0.00197
5133	TCGA-B5-A0K4-01A-11D-A043-02	Uterine	WGS	HMS-RK	369230948	223080	51	B5-A0K4-10A	WXS	WUGSC	150333723	14646	100	0.00811	0.03128	0.00189	0.00482
5134	TCGA-B5-A11Z-01A-11D-A10M-09	Uterine	WXS	WUGSC	149933470	15781	100	B5-A11Z-10A	WXS	WUGSC	152915545	13106	100	0.00208	0.00476	0	0.00062
5135	TCGA-BG-A0LW-01A-11D-A043-02	Uterine	WGS	HMS-RK	379930451	308096	51	BG-A0LW-10A	WXS	WUGSC	148376489	7819	100	0	0.02651	0.00501	0.01019
5136	TCGA-BS-A0UV-01A-11D-A101-02	Uterine	WGS	HMS-RK	225084377	105071	51	BS-A0UV-10A	WXS	WUGSC	226835698	13244	100	0	0.11417	0	0.00071
5137	TCGA-A5-A0GV-01A-31D-A043-02	Uterine	WGS	HMS-RK	315849528	445522	51	A5-A0GV-10A	WXS	WUGSC	147878555	14390	100	0.00389	0.05599	0.0019	0.00534
5138	TCGA-BG-A0VX-01A-11D-A122-09	Uterine	WXS	WUGSC	165795501	11015	100	BG-A0VX-10A	WXS	WUGSC	176126496	12769	100	0.00082	0.00317	0.00043	0.00237
5139	TCGA-A5-A0GU-01A-11D-A043-02	Uterine	WGS	HMS-RK	273464618	292859	51	A5-A0GU-10A	WXS	WUGSC	135120740	44923	100	0.02485	0.09407	0	0
5140	TCGA-D1-A0ZQ-01A-11D-A122-09	Uterine	WXS	WUGSC	186990674	44232	100	D1-A0ZQ-10A	WXS	WUGSC	195976525	16633	100	0.00189	0.00514	0.0017	0.00461
5141	TCGA-B5-A0K9-01A-21D-A101-02	Uterine	WGS	HMS-RK	267797133	94425	51	B5-A0K9-10A	WXS	WUGSC	103519461	6644	100	0	0	0	0
5142	TCGA-A5-A0R6-01A-11D-A101-02	Uterine	WGS	HMS-RK	191992102	261740	51	A5-A0R6-10A	WXS	WUGSC	79165202	6318	100	-1	-1	0	0
5143	TCGA-D1-A16I-01A-11D-A12F-02	Uterine	WGS	HMS-RK	221122583	73965	51	D1-A16I-10A	WXS	WUGSC	153252011	7085	100	0	0.07655	0.00057	0.00273
5144	TCGA-BS-A0UT-01A-11D-A101-02	Uterine	WGS	HMS-RK	225774972	135239	51	BS-A0UT-10A	WXS	WUGSC	98054462	6568	100	0	0	0	0
5145	TCGA-B5-A0K7-01A-11D-A101-02	Uterine	WGS	HMS-RK	276673804	175870	51	B5-A0K7-10A	WXS	WUGSC	99920884	24782	100	0	0.2468	0	0.00157
5146	TCGA-B5-A0JR-01A-13D-A043-02	Uterine	WGS	HMS-RK	320065721	231339	51	B5-A0JR-10A	WXS	WUGSC	112605684	10207	100	0.01013	0.05465	0.00606	0.01192
5147	TCGA-AP-A0L8-01A-11D-A043-02	Uterine	WGS	HMS-RK	306632568	237431	51	AP-A0L8-10A	WXS	WUGSC	138747476	14838	100	0.01121	0.05251	0.01178	0.01989
5148	TCGA-D1-A175-01A-11D-A12J-09	Uterine	WXS	WUGSC	183699931	5392	100	D1-A175-10A	WXS	WUGSC	176053615	8274	100	0.07603	0.0904	0.00134	0.00376
5149	TCGA-BS-A0T9-01A-11D-A12F-02	Uterine	WGS	HMS-RK	398237178	301297	51	BS-A0T9-10C	WXS	WUGSC	154332777	11523	100	0	0.05764	0	0
5150	TCGA-B5-A0JV-01A-11D-A101-02	Uterine	WGS	HMS-RK	290163798	239755	51	B5-A0JV-10A	WXS	WUGSC	264742164	48799	100	0	0	0	0
5151	TCGA-BG-A0W1-01A-12D-A10G-09	Uterine	WXS	WUGSC	107156236	6188	100	BG-A0W1-10A	WXS	WUGSC	214585588	11942	100	0.00333	0.00747	0.00037	0.0016
5152	TCGA-BS-A0UL-01A-11D-A10G-09	Uterine	WXS	WUGSC	104210868	10468	100	BS-A0UL-10A	WXS	WUGSC	110892403	12893	100	0	0	0	0
5153	TCGA-A5-A0VO-01A-21D-A10G-09	Uterine	WXS	WUGSC	113138003	7848	100	A5-A0VO-10A	WXS	WUGSC	103251250	9950	100	0.00278	0.00587	0.00085	0.00331
5154	TCGA-B5-A0K6-01A-11D-A043-02	Uterine	WGS	HMS-RK	249869254	129668	51	B5-A0K6-10A	WXS	WUGSC	160797850	10912	100	0.00936	0.03604	0	0.00098
5155	TCGA-A5-A0R7-01A-31D-A101-02	Uterine	WGS	HMS-RK	293798271	273027	51	A5-A0R7-10A	WXS	WUGSC	123069808	11944	100	0	0	0.0001	0.00153
5156	TCGA-A5-A0G1-01A-11D-A122-09	Uterine	WXS	WUGSC	181731496	17718	100	A5-A0G1-10A	WXS	WUGSC	158374815	17137	100	0.00292	0.00602	0.00274	0.00539
5157	TCGA-EO-A1Y8-01A-11D-A159-09	Uterine	WXS	WUGSC	132704283	45014	100	EO-A1Y8-10A	WXS	WUGSC	93182156	30884	100	0.00104	0.00698	0.0024	0.01142
5158	TCGA-A5-A0VQ-01A-11D-A101-02	Uterine	WGS	HMS-RK	258598195	188260	51	A5-A0VQ-10A	WXS	WUGSC	101378617	11758	100	0	0	0.00072	0.00398
5159	TCGA-B5-A11Q-01A-11D-A122-09	Uterine	WXS	WUGSC	194969366	11052	100	B5-A11Q-10A	WXS	WUGSC	161213410	18891	100	0.00265	0.00576	1e-05	0.00133
5160	TCGA-A5-A0G5-01A-11D-A043-02	Uterine	WGS	HMS-RK	384386702	570901	51	A5-A0G5-10A	WXS	WUGSC	152124908	66699	100	0.00034	0.0287	0.00114	0.00409
5161	TCGA-B5-A0JT-01A-21D-A122-09	Uterine	WXS	WUGSC	178928765	20950	100	B5-A0JT-10A	WXS	WUGSC	190810401	19609	100	0	0	0.00059	0.00249
5162	TCGA-FI-A2F8-01A-12D-A17D-09	Uterine	WXS	WUGSC	85847652	38851	100	FI-A2F8-10B	WXS	WUGSC	91377309	22342	100	0.00313	0.01126	0.02594	0.04507
5163	TCGA-AP-A0LH-01A-11D-A043-02	Uterine	WGS	HMS-RK	389456355	210956	51	AP-A0LH-10A	WXS	WUGSC	260359545	34371	100	0	0	0.00507	0.00829
5164	TCGA-BS-A0TA-01A-11D-A101-02	Uterine	WGS	HMS-RK	242825271	96627	51	BS-A0TA-10A	WXS	WUGSC	169544311	11288	100	0	0	0	0.00082
5165	TCGA-BG-A187-01A-11D-A12F-02	Uterine	WGS	HMS-RK	228475306	664600	51	BG-A187-10A	WXS	WUGSC	113720251	17858	100	0	0	0.00041	0.00275
5166	TCGA-BK-A139-01A-11D-A122-09	Uterine	WXS	WUGSC	188188585	21775	100	BK-A139-10A	WXS	WUGSC	173214765	6137	100	0.00017	0.00151	0.00266	0.00578
5167	TCGA-A5-A0GB-01A-11D-A043-02	Uterine	WGS	HMS-RK	347159865	97888	51	A5-A0GB-10A	WXS	WUGSC	132801657	13359	100	0	0.06482	0	0
5168	TCGA-AP-A0LJ-01A-11D-A043-02	Uterine	WGS	HMS-RK	481696809	502379	51	AP-A0LJ-10A	WXS	WUGSC	139504829	14103	100	0.01164	0.06261	0.01151	0.01945
5169	TCGA-D1-A167-01A-11D-A12J-09	Uterine	WXS	WUGSC	118014363	6116	100	D1-A167-10A	WXS	WUGSC	144851489	5998	100	0.00244	0.00569	8e-05	0.00126
5170	TCGA-D1-A101-01A-12D-A10M-09	Uterine	WXS	WUGSC	140953013	13348	100	D1-A101-10A	WXS	WUGSC	207121404	28748	100	0.00174	0.00459	0.00243	0.00579
5171	TCGA-BA-4078-01A-01D-1431-02	Head&Neck	WGS	HMS-RK	241977141	112279	51	BA-4078-10A	WGS	HMS-RK	288011801	148707	51	0	0	0	0.20179
5172	TCGA-CN-6013-01A-11D-1681-02	Head&Neck	WGS	HMS-RK	266069772	97668	51	CN-6013-10A	WGS	HMS-RK	388101208	316720	51	0	0.09652	0.00274	0.04
5173	TCGA-CV-6951-01A-11D-1911-02	Head&Neck	WGS	HMS-RK	447261465	151529	51	CV-6951-10A	WGS	HMS-RK	439407399	443981	51	0	0.07039	0	0.03332
5174	TCGA-CX-7085-01A-21D-2317-26	Head&Neck	WGS	HMS-RK	358895852	124753	51	CX-7085-10A	WGS	HMS-RK	188931237	90922	51	0	0	0	0
5175	TCGA-CN-4722-01A-01D-1431-02	Head&Neck	WGS	HMS-RK	240781446	338794	51	CN-4722-10A	WGS	HMS-RK	105525010	64056	51	0	0	-1	-1
5176	TCGA-BA-4075-01A-01D-1431-02	Head&Neck	WGS	HMS-RK	198178137	338917	51	BA-4075-10A	WGS	HMS-RK	293751729	155558	51	0	0	0	0
5178	TCGA-CQ-6223-01A-11D-1911-02	Head&Neck	WGS	HMS-RK	418858796	261143	51	CQ-6223-10A	WGS	HMS-RK	529905681	120155	51	0	0	0	0
5179	TCGA-CV-7434-01A-11D-2317-26	Head&Neck	WGS	HMS-RK	272724073	153900	51	CV-7434-10A	WGS	HMS-RK	354201055	242513	51	0	0	0	0
5181	TCGA-CV-7247-01A-11D-2317-26	Head&Neck	WGS	HMS-RK	289532323	123980	51	CV-7247-10A	WGS	HMS-RK	386876457	306319	51	0	0.10856	0	0
5182	TCGA-BA-5558-01A-01D-1509-02	Head&Neck	WGS	HMS-RK	402222502	357271	51	BA-5558-10A	WGS	HMS-RK	370539470	278786	51	0.00056	0.04352	0	0.08792
5183	TCGA-CN-4727-01A-01D-1431-02	Head&Neck	WGS	HMS-RK	334203789	539324	51	CN-4727-10A	WGS	HMS-RK	312172500	170040	51	0	0	0	0.01903
5184	TCGA-CV-5966-01A-11D-1681-02	Head&Neck	WGS	HMS-RK	389003464	245005	51	CV-5966-10A	WGS	HMS-RK	429584581	357502	51	0	0	0	0.04758
5185	TCGA-CN-4742-01A-02D-1509-02	Head&Neck	WGS	HMS-RK	374172853	417349	51	CN-4742-10A	WGS	HMS-RK	377398524	142240	51	0.00852	0.1157	0	0
5186	TCGA-BA-4077-01B-01D-1431-02	Head&Neck	WGS	HMS-RK	348832388	389876	51	BA-4077-10A	WGS	HMS-RK	382023176	317209	51	0	0	0	0
5187	TCGA-CQ-6224-01A-11D-1911-02	Head&Neck	WGS	HMS-RK	448576117	147003	51	CQ-6224-10A	WGS	HMS-RK	530229334	113003	51	0	0	0	0.05927
5189	TCGA-CV-6952-01A-11D-1911-02	Head&Neck	WGS	HMS-RK	413627172	218288	51	CV-6952-10A	WGS	HMS-RK	477127908	432022	51	0	0	0	0.02231
5191	TCGA-DK-A1AA-01A-11D-A13U-02	Bladder	WGS	HMS-RK	326555279	140681	51	DK-A1AA-10A	WGS	HMS-RK	403660270	47351	51	0	0	0	0
5192	TCGA-FD-A3SO-01A-11D-A233-26	Bladder	WGS	HMS-RK	440009294	198458	51	FD-A3SO-10A	WGS	HMS-RK	447675741	203853	51	0.01399	0.0749	0	0.02627
5193	TCGA-BL-A13J-01A-11D-A10R-02	Bladder	WGS	HMS-RK	413427635	168209	51	BL-A13J-10A	WGS	HMS-RK	504641686	74897	51	0.03273	0.07693	0.01002	0.0541
5194	TCGA-FD-A3SN-01A-12D-A233-26	Bladder	WGS	HMS-RK	328901993	263612	51	FD-A3SN-10A	WGS	HMS-RK	381075718	184597	51	0	0	0	0.04018
5195	TCGA-BT-A3PK-01A-21D-A221-26	Bladder	WGS	HMS-RK	330439150	138019	51	BT-A3PK-10A	WGS	HMS-RK	377274549	134100	51	0	0.1042	0	0.09213
5196	TCGA-DK-A1A3-01A-11D-A13U-02	Bladder	WGS	HMS-RK	421108364	349092	51	DK-A1A3-10A	WGS	HMS-RK	412038999	205021	51	0	0.04157	0.04485	0.11549
5197	TCGA-FD-A3SJ-01A-12D-A233-26	Bladder	WGS	HMS-RK	367293784	328835	51	FD-A3SJ-10A	WGS	HMS-RK	305282721	178128	51	0.00589	0.0826	0	0.13353
5198	TCGA-GC-A3I6-01A-11D-A210-26	Bladder	WGS	HMS-RK	383312431	132328	51	GC-A3I6-10A	WGS	HMS-RK	502898875	73580	51	0.00303	0.04403	0	0
5199	TCGA-FD-A3SP-01A-31D-A233-26	Bladder	WGS	HMS-RK	411889431	157049	51	FD-A3SP-10A	WGS	HMS-RK	431418192	268519	51	0	0	0	0.02231
5200	TCGA-GC-A3RD-01A-12D-A233-26	Bladder	WGS	HMS-RK	386829694	100098	51	GC-A3RD-10B	WGS	HMS-RK	294538275	92979	51	0.00078	0.05657	0	0
5201	TCGA-DK-A3WY-01A-11D-A233-26	Bladder	WGS	HMS-RK	263612386	81200	51	DK-A3WY-10A	WGS	HMS-RK	317521429	76371	51	-1	-1	0	0.04961
5202	TCGA-GV-A3JV-01A-11D-A221-26	Bladder	WGS	HMS-RK	346651628	156611	51	GV-A3JV-10B	WGS	HMS-RK	325696409	181269	51	0.00534	0.04672	0	0.17167
5203	TCGA-E5-A2PC-01A-11D-A204-02	Bladder	WGS	HMS-RK	467607756	290063	51	E5-A2PC-10B	WGS	HMS-RK	482127371	154398	51	0.02394	0.05907	0.01054	0.05683
5204	TCGA-CF-A1HR-01A-11D-A13U-02	Bladder	WGS	HMS-RK	293281166	149706	51	CF-A1HR-10A	WGS	HMS-RK	290701849	182525	51	0	0	0	0
5205	TCGA-G2-A2EC-01A-11D-A17R-02	Bladder	WGS	HMS-RK	370237592	508485	51	G2-A2EC-10A	WGS	HMS-RK	463610012	109494	51	0	0	0	0.01269
5206	TCGA-CF-A3MH-01A-11D-A210-26	Bladder	WGS	HMS-RK	456672236	194681	51	CF-A3MH-10A	WGS	HMS-RK	244967971	161172	51	0	0.03463	0	0
5207	TCGA-GV-A3QG-01A-11D-A221-26	Bladder	WGS	HMS-RK	334932894	168370	51	GV-A3QG-10A	WGS	HMS-RK	320377009	93188	51	0	0.08329	0	0.13983
5208	TCGA-CF-A3MG-01A-11D-A210-26	Bladder	WGS	HMS-RK	254183665	118033	51	CF-A3MG-10A	WGS	HMS-RK	263152475	251962	51	0	0	0	0
5209	TCGA-CU-A3YL-01A-11D-A233-26	Bladder	WGS	HMS-RK	299959649	168705	51	CU-A3YL-10A	WGS	HMS-RK	276126116	155603	51	0.00658	0.09146	0	0
5231	TCGA-44-6775-01A-11D-1853-02	Lung	WGS	HMS-RK	373052434	185984	51	44-6775-10A	WGS	HMS-RK	337394034	233619	51	0	0	0	0.06693
5233	TCGA-05-4417-01A-22D-1853-02	Lung	WGS	HMS-RK	364129493	169356	51	05-4417-10A	WGS	HMS-RK	483124348	667549	51	0	0.06482	0.01248	0.04788
5234	TCGA-50-5944-01A-11D-1751-02	Lung	WGS	HMS-RK	167538466	229146	51	50-5944-10A	WGS	HMS-RK	275558182	106011	51	-1	-1	0	0.0968
5236	TCGA-64-5774-01A-01D-1623-02	Lung	WGS	HMS-RK	481010827	203123	51	64-5774-10A	WGS	HMS-RK	348154891	114571	51	0.02577	0.07408	0	0
5242	TCGA-91-6828-01A-11D-1853-02	Lung	WGS	HMS-RK	401656030	233773	51	91-6828-10A	WGS	HMS-RK	411079638	334273	51	0	0	0.00283	0.04132
5243	TCGA-75-5146-01A-01D-1623-02	Lung	WGS	HMS-RK	62767472	41044	51	75-5146-10A	WGS	HMS-RK	523785979	242474	51	-1	-1	0.01296	0.04971
5245	TCGA-05-4384-01A-01D-1751-02	Lung	WGS	HMS-RK	472626897	801873	51	05-4384-10A	WGS	HMS-RK	384138023	359711	38-51	0.01092	0.03304	0	0
5246	TCGA-44-6776-01A-11D-1853-02	Lung	WGS	HMS-RK	358480154	247165	51	44-6776-10A	WGS	HMS-RK	366478880	237533	51	0	0	0.00058	0.045
5250	TCGA-05-4250-01A-01D-1103-02	Lung	WGS	HMS-RK	277599179	645475	51	05-4250-10A	WGS	HMS-RK	465042676	246129	51	0	0.02802	0.02201	0.0661
5252	TCGA-CV-6960-01A-41D-2317-26	Head&Neck	WGS	HMS-RK	323556432	511930	51	CV-6960-10A	WGS	HMS-RK	454454268	376171	51	0	0	0.01479	0.09501
5253	TCGA-CN-4739-01A-02D-1509-02	Head&Neck	WGS	HMS-RK	503438763	546494	51	CN-4739-10A	WGS	HMS-RK	330846771	199271	51	0	0.03567	0	0.09061
5254	TCGA-BB-4224-01A-01D-1431-02	Head&Neck	WGS	HMS-RK	312751963	417991	51	BB-4224-10A	WGS	HMS-RK	326867653	136145	51	0	0.11044	0	0
5256	TCGA-CN-4725-01A-01D-1431-02	Head&Neck	WGS	HMS-RK	279809167	597557	51	CN-4725-10A	WGS	HMS-RK	347193063	252727	51	0	0	0.00029	0.02475
5257	TCGA-CV-7178-01A-21D-2317-26	Head&Neck	WGS	HMS-RK	432188196	144926	51	CV-7178-10A	WGS	HMS-RK	412125009	494008	51	0	0	0	0
5258	TCGA-DQ-5624-01A-01D-1868-02	Head&Neck	WGS	HMS-RK	431460760	213712	51	DQ-5624-10A	WGS	HMS-RK	346590529	173502	51	0.00711	0.06166	0	0
5259	TCGA-CN-6996-01A-11D-1911-02	Head&Neck	WGS	HMS-RK	372030557	130352	51	CN-6996-10A	WGS	HMS-RK	479751016	561052	51	0	0.08299	0.00342	0.04949
5261	TCGA-BA-5151-01A-01D-1431-02	Head&Neck	WGS	HMS-RK	256726264	239868	51	BA-5151-10A	WGS	HMS-RK	287351252	84879	51	0	0	0	0
5265	TCGA-CN-5366-01A-01D-1431-02	Head&Neck	WGS	HMS-RK	348779158	242948	51	CN-5366-10A	WGS	HMS-RK	379879833	255536	51	0	0	0	0
5269	TCGA-CN-5369-01A-01D-1431-02	Head&Neck	WGS	HMS-RK	338347759	163072	51	CN-5369-10A	WGS	HMS-RK	324613006	243819	51	0	0	0	0.05674
5272	TCGA-DK-A1AC-01A-11D-A13U-02	Bladder	WGS	HMS-RK	404108675	165200	51	DK-A1AC-10A	WGS	HMS-RK	359556479	60618	51	0.01324	0.07097	0.00701	0.03806
5273	TCGA-BT-A3PJ-01A-21D-A221-26	Bladder	WGS	HMS-RK	351846568	286317	51	BT-A3PJ-10A	WGS	HMS-RK	349258917	192609	51	0	0.05008	0	0
5275	TCGA-DK-A2I6-01A-12D-A18D-02	Bladder	WGS	HMS-RK	389931321	265252	51	DK-A2I6-10A	WGS	HMS-RK	447287018	104517	51	0.01435	0.06	0.00737	0.0484
5276	TCGA-DK-A3IV-01A-22D-A21C-26	Bladder	WGS	HMS-RK	265315033	169340	51	DK-A3IV-10A	WGS	HMS-RK	252754711	38045	51	0	0	0	0
5277	TCGA-FD-A3N5-01A-11D-A21C-26	Bladder	WGS	HMS-RK	257076521	178170	51	FD-A3N5-10A	WGS	HMS-RK	158330236	68888	51	0	0.20179	-1	-1
5278	TCGA-BT-A2LD-01A-12D-A210-26	Bladder	WGS	HMS-RK	129963131	41824	51	BT-A2LD-10A	WGS	HMS-RK	335639655	194671	51	-1	-1	0	0
5279	TCGA-DK-A1A7-01A-11D-A13U-02	Bladder	WGS	HMS-RK	348271948	230706	51	DK-A1A7-10A	WGS	HMS-RK	396354477	182156	51	0	0	0	0
5280	TCGA-FD-A3N6-01A-11D-A21C-26	Bladder	WGS	HMS-RK	180979097	79445	51	FD-A3N6-10A	WGS	HMS-RK	220350129	186019	51	0	0	-1	-1
5281	TCGA-FD-A3NA-01A-11D-A21C-26	Bladder	WGS	HMS-RK	370368029	179774	51	FD-A3NA-10A	WGS	HMS-RK	379596057	197726	51	0.02125	0.09796	0	0.05729
5282	TCGA-GD-A3OS-01A-12D-A221-26	Bladder	WGS	HMS-RK	391412209	266424	51	GD-A3OS-10A	WGS	HMS-RK	387425405	190382	51	0	0.07577	0	0
5283	TCGA-GV-A3JZ-01A-11D-A21C-26	Bladder	WGS	HMS-RK	339096757	149787	51	GV-A3JZ-10A	WGS	HMS-RK	233846699	183130	51	0.00901	0.12171	-1	-1
5284	TCGA-BT-A2LB-01A-11D-A18D-02	Bladder	WGS	HMS-RK	307431766	213940	51	BT-A2LB-10A	WGS	HMS-RK	392931946	210061	51	0	0.03753	0	0.0638
5285	TCGA-CF-A1HS-01A-11D-A13U-02	Bladder	WGS	HMS-RK	316165155	203468	51	CF-A1HS-10A	WGS	HMS-RK	283327570	152188	51	0	0.0978	0	0
5287	TCGA-G2-A3IB-01A-11D-A210-26	Bladder	WGS	HMS-RK	436707038	534223	51	G2-A3IB-10A	WGS	HMS-RK	390695463	112892	51	0.00373	0.03291	0	0.0316
5288	TCGA-K4-A3WS-01A-11D-A23Q-26	Bladder	WGS	HMS-RK	462527787	245323	51	K4-A3WS-10A	WGS	HMS-RK	312793325	179737	51	0	0.01292	0	0
5289	TCGA-BT-A0S7-01A-11D-A10R-02	Bladder	WGS	HMS-RK	478298864	401439	51	BT-A0S7-10A	WGS	HMS-RK	525068960	93046	51	0.01121	0.05251	0.01637	0.04408
5290	TCGA-FD-A3SL-01A-21D-A233-26	Bladder	WGS	HMS-RK	365221082	316561	51	FD-A3SL-10A	WGS	HMS-RK	303853120	169353	51	0	0.08538	0	0
5311	TCGA-05-4249-01A-01D-1103-02	Lung	WGS	HMS-RK	288585270	671621	51	05-4249-10A	WGS	HMS-RK	242701492	219758	51	0	0.05059	0	0
5312	TCGA-44-6778-01A-11D-1853-02	Lung	WGS	HMS-RK	292375469	212711	51	44-6778-10A	WGS	HMS-RK	373122591	240059	51	0.0052	0.07354	0.0125	0.03964
5313	TCGA-64-5779-01A-01D-1623-02	Lung	WGS	HMS-RK	258121657	158437	51	64-5779-10A	WGS	HMS-RK	158774089	28575	51	0	0.11283	-1	-1
5314	TCGA-75-5125-01A-01D-1751-02	Lung	WGS	HMS-RK	274658151	407332	51	75-5125-10A	WGS	HMS-RK	251860105	140466	51	0.00913	0.04937	0.01101	0.0516
5315	TCGA-67-6217-01A-11D-1751-02	Lung	WGS	HMS-RK	408206697	309336	51	67-6217-10A	WGS	HMS-RK	356054708	421837	51	0.01133	0.04353	0.00589	0.03884
5318	TCGA-71-6725-01A-11D-1853-02	Lung	WGS	HMS-RK	414013121	539691	51	71-6725-10A	WGS	HMS-RK	416808175	624202	51	0.00969	0.03727	0.01001	0.04696
5319	TCGA-50-5045-01A-01D-1623-02	Lung	WGS	HMS-RK	307764525	253175	51	50-5045-10A	WGS	HMS-RK	165369763	96079	51	0	0.05311	-1	-1
5320	TCGA-05-4410-01A-21D-1853-02	Lung	WGS	HMS-RK	380782798	179000	51	05-4410-10A	WGS	HMS-RK	440012477	631450	51	0	0.0602	0.02521	0.0725
5321	TCGA-44-5645-01A-01D-1623-02	Lung	WGS	HMS-RK	33869306	23979	51	44-5645-10A	WGS	HMS-RK	59631158	26547	51	-1	-1	-1	-1
5322	TCGA-05-4425-01A-01D-1751-02	Lung	WGS	HMS-RK	421187568	1159458	51	05-4425-10A	WGS	HMS-RK	421616565	279018	51	0.02779	0.06295	0.01411	0.07553
5323	TCGA-44-5643-01A-01D-1623-02	Lung	WGS	HMS-RK	390174909	538715	51	44-5643-10A	WGS	HMS-RK	422425267	363177	51	0.00772	0.05062	0.01999	0.07075
5324	TCGA-05-5715-01A-01D-1623-02	Lung	WGS	HMS-RK	380328229	261230	38-51	05-5715-10A	WGS	HMS-RK	449316631	610829	51	0.00427	0.06109	0.02424	0.07269
5325	TCGA-44-6146-01A-11D-1751-02	Lung	WGS	HMS-RK	296320858	198201	51	44-6146-10A	WGS	HMS-RK	295084572	266617	51	0	0	0	0
5326	TCGA-86-6562-01A-11D-1751-02	Lung	WGS	HMS-RK	385085359	210177	51	86-6562-10A	WGS	HMS-RK	345690884	190837	51	0.01313	0.08477	0.01087	0.09257
5327	TCGA-05-4433-01A-22D-1853-02	Lung	WGS	HMS-RK	324973696	269057	51	05-4433-10A	WGS	HMS-RK	221496425	471538	51	0	0	0.00193	0.11155
5328	TCGA-75-6205-01A-11D-1751-02	Lung	WGS	HMS-RK	352382998	139631	51	75-6205-10A	WGS	HMS-RK	301657669	412818	51	0	0	0	0.11283
5329	TCGA-75-5126-01A-01D-1751-02	Lung	WGS	HMS-RK	253146674	404657	51	75-5126-10A	WGS	HMS-RK	400945468	214849	51	0.03246	0.07796	0.04579	0.13003
5330	TCGA-64-5815-01A-01D-1623-02	Lung	WGS	HMS-RK	486311008	180677	51	64-5815-10A	WGS	HMS-RK	374316091	39524	51	0.00762	0.04131	0	0
5331	TCGA-F4-6806-01A-11D-1835-10	Colorectal	WXS	BCM	110822709	73044	100	F4-6806-10A	WXS	BCM	101492798	28990	100	0.0017	0.00661	0.00045	0.00401
5332	TCGA-D5-6535-01A-11D-1719-10	Colorectal	WXS	BCM	145144608	17724	100	D5-6535-10A	WXS	BCM	166930058	23650	100	8e-05	0.00124	0.00047	0.002
5333	TCGA-DM-A28K-01A-21D-A16V-10	Colorectal	WXS	BCM	139774192	32242	100	DM-A28K-10A	WXS	BCM	101605011	9944	100	0.01341	0.02254	0.00274	0.00926
5334	TCGA-CM-6679-01A-11D-1835-10	Colorectal	WXS	BCM	66509230	34288	100	CM-6679-10A	WXS	BCM	199069694	70995	100	0.00133	0.00892	0.00081	0.00344
5335	TCGA-G4-6315-01A-11D-1719-10	Colorectal	WXS	BCM	149185782	17696	100	G4-6315-10A	WXS	BCM	161667108	7105	100	0.00817	0.01267	0.00828	0.01338
5336	TCGA-D5-6930-01A-11D-1924-10	Colorectal	WXS	BCM	136998516	62042	100	D5-6930-10A	WXS	BCM	105105371	29416	100	0.00338	0.00822	0.00397	0.01076
5337	TCGA-AD-6889-01A-11D-1924-10	Colorectal	WXS	BCM	138285396	40895	100	AD-6889-10A	WXS	BCM	162532288	63575	100	0.00344	0.00802	0.00102	0.00368
5338	TCGA-A6-2671-01A-01D-1408-10	Colorectal	WXS	BCM	138349747	135276	100	A6-2671-10A	WXS	BCM	120484753	35340	100	0.01356	0.02468	0.00174	0.0074
5339	TCGA-DM-A0X9-01A-11D-A152-10	Colorectal	WXS	BCM	178942392	75060	100	DM-A0X9-10A	WXS	BCM	179183379	24558	100	0.005	0.01043	0.00093	0.00398
5340	TCGA-A6-6654-01A-21D-1835-10	Colorectal	WXS	BCM	113736411	41659	100	A6-6654-10A	WXS	BCM	202740372	55785	100	0.00198	0.00769	0.00406	0.00846
5341	TCGA-A6-5656-01A-21D-1835-10	Colorectal	WXS	BCM	97455432	137252	100	A6-5656-10A	WXS	BCM	70149634	16137	100	0.00358	0.01045	0.00173	0.00825
5342	TCGA-F4-6703-01A-11D-1835-10	Colorectal	WXS	BCM	122584815	54415	100	F4-6703-10A	WXS	BCM	78109943	19766	100	0	0	0.00176	0.00837
5343	TCGA-DM-A1D0-01A-11D-A152-10	Colorectal	WXS	BCM	179689059	103659	100	DM-A1D0-10A	WXS	BCM	167428544	26793	100	0.01379	0.0213	0.00262	0.00688
5344	TCGA-CM-4748-01A-01D-1408-10	Colorectal	WXS	BCM	102559214	210099	100	CM-4748-10A	WXS	BCM	102562814	26273	100	0.00711	0.01594	0.00492	0.01334
5345	TCGA-F4-6807-01A-11D-1835-10	Colorectal	WXS	BCM	95513395	61996	100	F4-6807-10A	WXS	BCM	91120523	43925	100	0.00177	0.00686	0.0046	0.01146
5346	TCGA-DM-A1DA-01A-11D-A152-10	Colorectal	WXS	BCM	219477634	55870	100	DM-A1DA-10A	WXS	BCM	181558277	13989	100	0.02147	0.02807	0.00185	0.00541
5347	TCGA-A6-6138-01A-11D-1771-10	Colorectal	WXS	BCM	194540816	74714	100	A6-6138-10A	WXS	BCM	228900256	80586	100	0.00125	0.0045	0.00278	0.00649
5348	TCGA-G4-6293-01A-11D-1719-10	Colorectal	WXS	BCM	176764702	18639	100	G4-6293-10A	WXS	BCM	83358157	5298	100	0.00691	0.01045	0.00407	0.00929
5349	TCGA-F4-6459-01A-11D-1771-10	Colorectal	WXS	BCM	185037921	126504	100	F4-6459-10A	WXS	BCM	164280135	42257	100	0.00214	0.00563	0.00146	0.00468
5350	TCGA-CK-5916-01A-11D-1650-10	Colorectal	WXS	BCM	261392112	50824	100	CK-5916-10A	WXS	BCM	138006825	28687	100	0	0	0.00133	0.00448
5351	TCGA-CV-6938-01A-11D-1911-02	Head&Neck	WGS	HMS-RK	405922367	141920	51	CV-6938-10A	WGS	HMS-RK	413323927	287703	51	0	0	0.00051	0.0402
5352	TCGA-CQ-5327-01A-01D-1681-02	Head&Neck	WGS	HMS-RK	242679539	102657	51	CQ-5327-10A	WGS	HMS-RK	262582742	83727	51	0	0.17241	0	0
5353	TCGA-CV-7183-01A-11D-2317-26	Head&Neck	WGS	HMS-RK	384178699	140513	51	CV-7183-10A	WGS	HMS-RK	82922502	41364	51	0	0	-1	-1
5354	TCGA-CQ-7065-01A-11D-2317-26	Head&Neck	WGS	HMS-RK	504450258	194454	51	CQ-7065-10A	WGS	HMS-RK	312975621	95694	51	0	0.01958	0	0
5355	TCGA-CV-7432-01A-11D-2317-26	Head&Neck	WGS	HMS-RK	356060823	222879	51	CV-7432-10A	WGS	HMS-RK	354251132	216003	51	0	0	0.00541	0.21994
5356	TCGA-CQ-6219-01A-11D-1911-02	Head&Neck	WGS	HMS-RK	348665803	121885	51	CQ-6219-10A	WGS	HMS-RK	503890239	210180	51	0	0	0	0.03247
5358	TCGA-CV-7428-01A-11D-2317-26	Head&Neck	WGS	HMS-RK	422545521	296523	51	CV-7428-10A	WGS	HMS-RK	436959139	383668	51	0	0.0297	0	0.05517
5359	TCGA-CN-4734-01A-01D-1431-02	Head&Neck	WGS	HMS-RK	308493417	355958	51	CN-4734-10A	WGS	HMS-RK	376780189	382910	51	0	0	0.0061	0.05316
5363	TCGA-CN-4735-01A-01D-1431-02	Head&Neck	WGS	HMS-RK	283447720	530894	51	CN-4735-10A	WGS	HMS-RK	178104366	112296	51	0	0	0	0.07275
5366	TCGA-CV-7407-01A-11D-2317-26	Head&Neck	WGS	HMS-RK	294401670	215934	51	CV-7407-10A	WGS	HMS-RK	346959319	164293	51	0	0	0	0
5367	TCGA-CV-6945-01A-11D-1911-02	Head&Neck	WGS	HMS-RK	392478229	240634	51	CV-6945-10A	WGS	HMS-RK	437699370	359275	51	0	0	0	0.05045
5368	TCGA-BA-5555-01A-01D-1509-02	Head&Neck	WGS	HMS-RK	339546791	221650	51	BA-5555-10A	WGS	HMS-RK	410303634	277426	51	0	0	0	0.04018
5369	TCGA-CN-5356-01A-01D-1431-02	Head&Neck	WGS	HMS-RK	300027090	234531	51	CN-5356-10A	WGS	HMS-RK	400792298	157271	51	0	0	0.00969	0.04075
5370	TCGA-DK-A1A5-01A-11D-A13U-02	Bladder	WGS	HMS-RK	335908155	69710	51	DK-A1A5-10A	WGS	HMS-RK	358449126	119551	51	0	0.12461	0	0
5372	TCGA-FD-A3SQ-01A-21D-A233-26	Bladder	WGS	HMS-RK	439607623	194799	51	FD-A3SQ-10A	WGS	HMS-RK	430652701	190200	51	0	0.04522	0	0.02365
5373	TCGA-FD-A3B7-01A-31D-A210-26	Bladder	WGS	HMS-RK	478913715	159056	51	FD-A3B7-10A	WGS	HMS-RK	389431622	107101	51	0.00105	0.07167	0	0.10086
5374	TCGA-DK-A3IU-01A-11D-A210-26	Bladder	WGS	HMS-RK	411506053	57205	51	DK-A3IU-10A	WGS	HMS-RK	252570397	19799	51	0	0.05595	0	0
5375	TCGA-DK-A1AE-01A-11D-A13U-02	Bladder	WGS	HMS-RK	552219362	430796	51	DK-A1AE-10A	WGS	HMS-RK	423306282	83626	51	0	0.02699	0	0.02118
5377	TCGA-CU-A0YO-01A-11D-A10R-02	Bladder	WGS	HMS-RK	330376003	147195	51	CU-A0YO-10A	WGS	HMS-RK	342017883	176895	51	0	0	0.00057	0.044
5378	TCGA-CF-A3MI-01A-11D-A210-26	Bladder	WGS	HMS-RK	389848646	256105	51	CF-A3MI-10A	WGS	HMS-RK	393953723	401792	51	0	0.05143	0.00046	0.03692
5379	TCGA-CU-A3QU-01A-11D-A233-26	Bladder	WGS	HMS-RK	268491989	63582	51	CU-A3QU-10B	WGS	HMS-RK	326924884	80094	51	0.00377	0.05436	0	0.08116
5380	TCGA-GD-A2C5-01A-12D-A17R-02	Bladder	WGS	HMS-RK	383057463	233644	51	GD-A2C5-10A	WGS	HMS-RK	364709111	205181	51	0	0.04051	0	0.21381
5381	TCGA-G2-A2EF-01A-12D-A18D-02	Bladder	WGS	HMS-RK	199735341	305493	51	G2-A2EF-10A	WGS	HMS-RK	177143474	133992	51	0	0	-1	-1
5382	TCGA-GV-A3JW-01A-11D-A210-26	Bladder	WGS	HMS-RK	286140156	186609	51	GV-A3JW-10A	WGS	HMS-RK	442422008	240188	51	0.0059	0.05151	0.00145	0.09103
5383	TCGA-E7-A3Y1-01A-11D-A233-26	Bladder	WGS	HMS-RK	297146144	123639	51	E7-A3Y1-10A	WGS	HMS-RK	332926717	289823	51	0	0.06937	0	0
5384	TCGA-GC-A3BM-01A-11D-A23Q-26	Bladder	WGS	HMS-RK	325593976	124960	51	GC-A3BM-10A	WGS	HMS-RK	311158366	169987	51	0.00613	0.08562	0	0.07755
5385	TCGA-DK-A3IQ-01A-31D-A210-26	Bladder	WGS	HMS-RK	421904617	163519	51	DK-A3IQ-10A	WGS	HMS-RK	330922542	63615	51	0	0	0	0.18863
5386	TCGA-DK-A1AG-01A-11D-A13U-02	Bladder	WGS	HMS-RK	339160147	175363	51	DK-A1AG-10A	WGS	HMS-RK	452123249	95141	51	0	0	0	0
5387	TCGA-G2-A2EJ-01A-11D-A17R-02	Bladder	WGS	HMS-RK	426107424	604682	51	G2-A2EJ-10A	WGS	HMS-RK	443500327	139058	51	0.00064	0.04874	0	0.04086
5388	TCGA-FD-A3B6-01A-21D-A210-26	Bladder	WGS	HMS-RK	480920013	192760	51	FD-A3B6-10A	WGS	HMS-RK	431642666	168758	51	0.01775	0.04777	0	0.07153
5389	TCGA-G2-A2EL-01A-12D-A18D-02	Bladder	WGS	HMS-RK	386272324	108681	51	G2-A2EL-10A	WGS	HMS-RK	148384966	50499	51	0	0.02508	-1	-1
5410	TCGA-75-6206-01A-11D-1751-02	Lung	WGS	HMS-RK	374876609	433277	51	75-6206-10A	WGS	HMS-RK	300337559	191510	51	0	0	0	0.08709
5411	TCGA-50-5946-01A-11D-1751-02	Lung	WGS	HMS-RK	263432529	190605	51	50-5946-10A	WGS	HMS-RK	270266087	85128	51	0	0	0	0
5415	TCGA-05-4415-01A-22D-1853-02	Lung	WGS	HMS-RK	350751429	444697	51	05-4415-10A	WGS	HMS-RK	488715667	382057	51	0	0	0.01071	0.045
5418	TCGA-55-6543-01A-11D-1751-02	Lung	WGS	HMS-RK	287135109	162408	51	55-6543-10A	WGS	HMS-RK	479023351	345336	51	0	0	0.00446	0.03918
5419	TCGA-67-6216-01A-11D-1751-02	Lung	WGS	HMS-RK	259483429	233199	51	67-6216-10A	WGS	HMS-RK	346929786	496432	51	0	0	0.02516	0.13171
5420	TCGA-50-5049-01A-01D-1623-02	Lung	WGS	HMS-RK	384616658	258259	51	50-5049-10A	WGS	HMS-RK	386074276	344025	51	0	0.03886	0	0.01603
5421	TCGA-75-5122-01A-01D-1751-02	Lung	WGS	HMS-RK	266053546	299776	51	75-5122-10A	WGS	HMS-RK	366816133	90192	51	0.00887	0.04797	0.02584	0.07743
5423	TCGA-64-5778-01A-01D-1623-02	Lung	WGS	HMS-RK	237507906	140671	51	64-5778-10A	WGS	HMS-RK	228491168	35653	51	0	0.07422	0	0
5426	TCGA-G4-6314-01A-11D-1719-10	Colorectal	WXS	BCM	146036219	14097	100	G4-6314-10A	WXS	BCM	228761324	11217	100	0.00184	0.00414	8e-05	0.00118
5427	TCGA-DM-A1D8-01A-11D-A152-10	Colorectal	WXS	BCM	170002296	155784	100	DM-A1D8-10A	WXS	BCM	169429126	28470	100	0.00337	0.00745	0.00177	0.00498
5428	TCGA-F4-6805-01A-11D-1835-10	Colorectal	WXS	BCM	127140829	89487	100	F4-6805-10A	WXS	BCM	127918314	66320	100	0	0	0.00041	0.00365
5429	TCGA-G4-6310-01A-11D-1719-10	Colorectal	WXS	BCM	152022251	25507	100	G4-6310-10A	WXS	BCM	176501967	6834	100	0.00465	0.00812	0.0035	0.0067
5430	TCGA-AD-6895-01A-11D-1924-10	Colorectal	WXS	BCM	109784456	44575	100	AD-6895-10A	WXS	BCM	150855134	33080	100	0	0.00361	0.00042	0.00381
5432	TCGA-F4-6569-01A-11D-1771-10	Colorectal	WXS	BCM	168609743	47719	100	F4-6569-10A	WXS	BCM	158157126	37718	100	0.00169	0.00607	0.00018	0.00271
5433	TCGA-A6-5659-01A-01D-1650-10	Colorectal	WXS	BCM	232363876	72616	100	A6-5659-10A	WXS	BCM	220103019	41205	100	0.01149	0.01806	0.00199	0.00541
5434	TCGA-A6-6782-01A-11D-1835-10	Colorectal	WXS	BCM	108376002	95055	100	A6-6782-10A	WXS	BCM	71663277	26853	100	0.02143	0.03454	0.00533	0.014
5436	TCGA-D5-6533-01A-11D-1719-10	Colorectal	WXS	BCM	171723648	23551	100	D5-6533-10A	WXS	BCM	163341436	13395	100	0.00141	0.00352	0.00286	0.00563
5437	TCGA-CM-6675-01A-11D-1835-10	Colorectal	WXS	BCM	109932845	35825	100	CM-6675-10A	WXS	BCM	172701200	62612	100	0.00345	0.01005	0.00039	0.0026
5438	TCGA-CM-5341-01A-01D-1408-10	Colorectal	WXS	BCM	93617563	49734	100	CM-5341-10A	WXS	BCM	91603063	26582	100	0.00049	0.0044	0.00115	0.00632
5439	TCGA-G4-6317-01A-11D-1719-10	Colorectal	WXS	BCM	113062915	14369	100	G4-6317-10A	WXS	BCM	192480708	9714	100	0.01429	0.02037	0.00197	0.00459
5440	TCGA-CM-5344-01A-21D-1719-10	Colorectal	WXS	BCM	190676629	18572	100	CM-5344-10A	WXS	BCM	171558772	11798	100	0.00559	0.00941	0.0044	0.00815
5441	TCGA-CM-5864-01A-01D-1650-10	Colorectal	WXS	BCM	271687418	98283	100	CM-5864-10A	WXS	BCM	117158931	18740	100	0.00797	0.01235	2e-05	0.00193
5442	TCGA-DM-A28E-01A-11D-A16V-10	Colorectal	WXS	BCM	104528387	54812	100	DM-A28E-10A	WXS	BCM	103501040	14278	100	0.00538	0.01188	0.00341	0.00873
5443	TCGA-G4-6588-01A-11D-1771-10	Colorectal	WXS	BCM	236262647	55834	100	G4-6588-10A	WXS	BCM	182429259	55979	100	0.00025	0.00226	0.00194	0.0051
5444	TCGA-D5-6927-01A-21D-1924-10	Colorectal	WXS	BCM	153912587	50310	100	D5-6927-10A	WXS	BCM	114852465	32816	100	0.00177	0.00539	0.00264	0.00805
5445	TCGA-CM-6168-01A-11D-1650-10	Colorectal	WXS	BCM	219578383	59021	100	CM-6168-10A	WXS	BCM	139279448	12284	100	0.00044	0.0024	0.00017	0.00264
5446	TCGA-EA-A3Y4-01A-51D-A243-09	Cervical	WXS	WUGSC	75699798	10654	100	EA-A3Y4-10A	WXS	WUGSC	78489038	13179	100	0.0267	0.03992	0.02368	0.03549
5447	TCGA-C5-A2M1-01A-11D-A18J-09	Cervical	WXS	WUGSC	89735054	29125	100	C5-A2M1-10A	WXS	WUGSC	53471674	7685	100	0.00847	0.01619	0.00816	0.01863
5448	TCGA-DG-A2KK-01A-11D-A17W-09	Cervical	WXS	WUGSC	85466267	20463	100	DG-A2KK-10A	WXS	WUGSC	87497706	22357	100	0.00832	0.01605	0.00562	0.01221
5449	TCGA-EA-A411-01A-11D-A243-09	Cervical	WXS	WUGSC	64046460	10820	100	EA-A411-10A	WXS	WUGSC	67284232	12364	100	0.02026	0.03401	0.02121	0.0342
5450	TCGA-FU-A3HY-01A-11D-A21Q-09	Cervical	WXS	WUGSC	70895465	26998	100	FU-A3HY-10A	WXS	WUGSC	71151534	13084	100	0.00724	0.01455	0.01021	0.01887
5451	TCGA-EA-A410-01A-11D-A243-09	Cervical	WXS	WUGSC	71861234	12192	100	EA-A410-10A	WXS	WUGSC	57465066	8897	100	0.00813	0.01856	0.03922	0.06179
5452	TCGA-HM-A3JK-01A-11D-A21Q-09	Cervical	WXS	WUGSC	71572142	8992	100	HM-A3JK-10A	WXS	WUGSC	61978806	17574	100	0.01044	0.0193	0.02988	0.04581
5453	TCGA-LP-A4AU-01A-32D-A243-09	Cervical	WXS	WUGSC	74135733	6030	100	LP-A4AU-10A	WXS	WUGSC	63197061	18125	100	0.01018	0.01911	0.01121	0.02141
5454	TCGA-EK-A2RJ-01A-11D-A18J-09	Cervical	WXS	WUGSC	53596446	15954	100	EK-A2RJ-10A	WXS	WUGSC	70501060	3309	100	0.01803	0.03104	0.00465	0.01157
5455	TCGA-EK-A2H0-01A-11D-A17W-09	Cervical	WXS	WUGSC	71370497	19227	100	EK-A2H0-10A	WXS	WUGSC	78470968	15034	100	0.0186	0.02939	0.00872	0.01601
5456	TCGA-FU-A3NI-01A-11D-A21Q-09	Cervical	WXS	WUGSC	65565817	15055	100	FU-A3NI-10A	WXS	WUGSC	64987543	13616	100	0.00632	0.01501	0.0091	0.01919
5457	TCGA-EK-A2PM-01A-11D-A18J-09	Cervical	WXS	WUGSC	76334886	29205	100	EK-A2PM-10A	WXS	WUGSC	76191276	8810	100	0.01976	0.03275	0.00647	0.01537
5458	TCGA-EK-A2R9-01A-11D-A18J-09	Cervical	WXS	WUGSC	82339270	12281	100	EK-A2R9-10A	WXS	WUGSC	75851702	4103	100	0.02279	0.03557	0.00913	0.01875
5459	TCGA-FU-A40J-01A-11D-A243-09	Cervical	WXS	WUGSC	79700556	10193	100	FU-A40J-10A	WXS	WUGSC	71476696	11080	100	0.01302	0.02387	0.02976	0.0454
5460	TCGA-C5-A2LY-01A-31D-A18J-09	Cervical	WXS	WUGSC	82620201	7541	100	C5-A2LY-10A	WXS	WUGSC	127122699	22652	100	0.00212	0.00677	0.0067	0.01281
5461	TCGA-HM-A3JJ-01A-21D-A21Q-09	Cervical	WXS	WUGSC	55596570	7390	100	HM-A3JJ-10A	WXS	WUGSC	67844005	20025	100	0.00285	0.01209	0.00222	0.00861
5462	TCGA-EX-A3L1-01A-11D-A21Q-09	Cervical	WXS	WUGSC	67955528	7455	100	EX-A3L1-10A	WXS	WUGSC	68895951	10256	100	0.01113	0.02186	0.00812	0.01737
5463	TCGA-EK-A2RC-01A-11D-A18J-09	Cervical	WXS	WUGSC	79568382	12225	100	EK-A2RC-10A	WXS	WUGSC	71831272	4372	100	0.00602	0.01462	0.00434	0.01319
5464	TCGA-DG-A2KL-01A-11D-A17W-09	Cervical	WXS	WUGSC	76107572	4835	100	DG-A2KL-10A	WXS	WUGSC	71953166	40727	100	0.0097	0.01808	0.00756	0.01535
5465	TCGA-EK-A2RA-01A-11D-A18J-09	Cervical	WXS	WUGSC	69042275	10303	100	EK-A2RA-10A	WXS	WUGSC	74806928	3507	100	0.00813	0.01597	0.00728	0.01479
5466	TCGA-IR-A3LB-01A-11D-A243-09	Cervical	WXS	WUGSC	59910848	18284	100	IR-A3LB-10A	WXS	WUGSC	65892614	10619	100	0.00857	0.01921	0.01342	0.02497
5467	TCGA-LP-A4AW-01A-11D-A243-09	Cervical	WXS	WUGSC	92911699	34072	100	LP-A4AW-10A	WXS	WUGSC	68379230	9761	100	0.0103	0.01817	0.01185	0.02115
5468	TCGA-EK-A2R8-01A-21D-A18J-09	Cervical	WXS	WUGSC	80682560	17205	100	EK-A2R8-10A	WXS	WUGSC	85467949	7280	100	0.00424	0.01114	0.00048	0.00431
5469	TCGA-JX-A3Q8-01A-11D-A21Q-09	Cervical	WXS	WUGSC	58413102	4534	100	JX-A3Q8-10A	WXS	WUGSC	66155636	15495	100	0.01178	0.02249	0.01066	0.02055
5470	TCGA-EK-A2RB-01A-11D-A18J-09	Cervical	WXS	WUGSC	70587667	10878	100	EK-A2RB-10A	WXS	WUGSC	78632133	3500	100	0.01063	0.02133	0.01413	0.02536
5471	TCGA-EK-A2GZ-01A-11D-A17W-09	Cervical	WXS	WUGSC	82367405	27127	100	EK-A2GZ-10A	WXS	WUGSC	75566808	23638	100	0.01312	0.02406	0.00914	0.01877
5472	TCGA-FU-A2QG-01A-11D-A18J-09	Cervical	WXS	WUGSC	89277031	13891	100	FU-A2QG-10A	WXS	WUGSC	74743554	14533	100	0.01144	0.02114	0.00054	0.00486
5473	TCGA-C5-A2LT-01A-11D-A18J-09	Cervical	WXS	WUGSC	70991990	49865	100	C5-A2LT-10A	WXS	WUGSC	69149395	14824	100	0.01804	0.03044	0.0116	0.02256
5474	TCGA-C5-A2LV-01A-11D-A18J-09	Cervical	WXS	WUGSC	70966887	12088	100	C5-A2LV-10A	WXS	WUGSC	77408961	22721	100	0.01553	0.0272	0.00532	0.01264
5475	TCGA-EA-A43B-01A-81D-A243-09	Cervical	WXS	WUGSC	67130950	11333	100	EA-A43B-10A	WXS	WUGSC	68717804	9589	100	0.00833	0.01867	0.00775	0.0171
5476	TCGA-EK-A2PK-01A-11D-A18J-09	Cervical	WXS	WUGSC	71661673	11953	100	EK-A2PK-10A	WXS	WUGSC	80684894	13426	100	0.00391	0.00999	0.0094	0.01751
5477	TCGA-EA-A439-01A-11D-A243-09	Cervical	WXS	WUGSC	68520470	10513	100	EA-A439-10A	WXS	WUGSC	67398762	15018	100	0.01429	0.02462	0.01025	0.01941
5478	TCGA-EK-A2H1-01A-11D-A17W-09	Cervical	WXS	WUGSC	85836742	13804	100	EK-A2H1-10A	WXS	WUGSC	78861301	13592	100	0.01136	0.02003	0.01911	0.03104
5479	TCGA-JX-A3Q0-01A-11D-A21Q-09	Cervical	WXS	WUGSC	67962399	9769	100	JX-A3Q0-10A	WXS	WUGSC	74242020	15821	100	0.00187	0.00793	0.00448	0.01176
5480	TCGA-EK-A2RL-01A-11D-A18J-09	Cervical	WXS	WUGSC	86558716	14564	100	EK-A2RL-10A	WXS	WUGSC	68806726	3634	100	0.00902	0.01755	0.00807	0.01809
5481	TCGA-EK-A2RK-01A-11D-A18J-09	Cervical	WXS	WUGSC	65031541	20018	100	EK-A2RK-10A	WXS	WUGSC	72515617	4566	100	0.00986	0.01958	0.00514	0.01249
5482	TCGA-EK-A2PL-01A-11D-A18J-09	Cervical	WXS	WUGSC	76477197	14281	100	EK-A2PL-10A	WXS	WUGSC	68754181	22672	100	0.00805	0.01635	0.00216	0.00777
5483	TCGA-EA-A3HT-01A-61D-A21Q-09	Cervical	WXS	WUGSC	69685164	10017	100	EA-A3HT-10A	WXS	WUGSC	70479656	15129	100	0.00787	0.01796	0.0026	0.00935
5484	TCGA-LP-A4AX-01A-12D-A243-09	Cervical	WXS	WUGSC	63601267	5842	100	LP-A4AX-10A	WXS	WUGSC	72138001	16263	100	0.01223	0.02314	0.01017	0.01925
5485	TCGA-EK-A2RO-01A-11D-A18J-09	Cervical	WXS	WUGSC	80441468	12199	100	EK-A2RO-10A	WXS	WUGSC	77817499	2737	100	0.00353	0.00957	0.00776	0.01576
5486	TCGA-EA-A3QE-01A-21D-A21Q-09	Cervical	WXS	WUGSC	65183119	8920	100	EA-A3QE-10A	WXS	WUGSC	60844454	7480	100	0.0037	0.01127	0.01016	0.02087
5487	TCGA-EK-A2PI-01A-11D-A18J-09	Cervical	WXS	WUGSC	72866015	12946	100	EK-A2PI-10A	WXS	WUGSC	89911345	24780	100	0.01119	0.02245	0.01088	0.02097
5488	TCGA-EK-A2R7-01A-11D-A18J-09	Cervical	WXS	WUGSC	69227094	9818	100	EK-A2R7-10A	WXS	WUGSC	72320342	3006	100	0.01616	0.03007	0.00572	0.01461
5489	TCGA-DG-A2KM-01A-11D-A17W-09	Cervical	WXS	WUGSC	73617378	5137	100	DG-A2KM-10A	WXS	WUGSC	71033565	9578	100	0.01129	0.02175	0.00682	0.01587
5490	TCGA-LP-A4AV-01A-11D-A243-09	Cervical	WXS	WUGSC	44043203	4190	100	LP-A4AV-10A	WXS	WUGSC	59057768	14136	100	0.00929	0.02047	0.00659	0.01455
5491	TCGA-EK-A2PG-01A-11D-A18J-09	Cervical	WXS	WUGSC	73215603	28075	100	EK-A2PG-10A	WXS	WUGSC	63185030	31387	100	0.0389	0.05426	0.0127	0.0247
5492	TCGA-DG-A2KJ-01A-11D-A18J-09	Cervical	WXS	WUGSC	78032655	7097	100	DG-A2KJ-10A	WXS	WUGSC	76246524	18343	100	0.00789	0.01567	0.00779	0.01564
5493	TCGA-EK-A2IP-01A-11D-A17W-09	Cervical	WXS	WUGSC	78379417	11093	100	EK-A2IP-10A	WXS	WUGSC	75844833	21467	100	0.01611	0.02638	0.00807	0.0162
5494	TCGA-C5-A2M2-01A-21D-A18J-09	Cervical	WXS	WUGSC	63622101	16656	100	C5-A2M2-10A	WXS	WUGSC	68748713	12891	100	0.01312	0.02527	0.00491	0.01223
5495	TCGA-C5-A2LX-01A-11D-A18J-09	Cervical	WXS	WUGSC	76488215	10678	100	C5-A2LX-10A	WXS	WUGSC	74000428	12352	100	0.01793	0.02843	0.00923	0.01763
5496	TCGA-JX-A3PZ-01A-11D-A21Q-09	Cervical	WXS	WUGSC	72739498	8097	100	JX-A3PZ-10A	WXS	WUGSC	71986782	18137	100	0.02718	0.04108	0.01363	0.02463
5497	TCGA-EK-A2RE-01A-11D-A18J-09	Cervical	WXS	WUGSC	74074329	12293	100	EK-A2RE-10A	WXS	WUGSC	61211931	4846	100	0.00625	0.01485	0.00797	0.01854
5499	TCGA-CN-4741-01A-01D-2268-08	Head&Neck	WGS	BI	1315461943	1247880	101	CN-4741-10A	WGS	BI	1311356547	764897	101	0.0053	0.01542	0	0
5500	TCGA-BA-4077-01B-01D-2268-08	Head&Neck	WGS	BI	1274359732	1363449	101	BA-4077-10A	WGS	BI	1172127957	1001190	101	0.00071	0.00633	0	0
5501	TCGA-BB-4225-01A-01D-2268-08	Head&Neck	WGS	BI	1661579051	1277453	101	BB-4225-10A	WGS	BI	1264792367	498737	101	0.0069	0.01547	0	0
5502	TCGA-BA-5153-01A-01D-2268-08	Head&Neck	WGS	BI	1100707078	595116	101	BA-5153-10A	WGS	BI	1192082154	303763	101	0	0.00356	0	0.00443
5503	TCGA-05-4395-01A-01D-2364-08	Lung	WGS	BI	1254216590	4299630	101	05-4395-10A	WGS	BI	1148168429	1121987	101	0.01193	0.0245	0	0
5504	TCGA-05-4396-01A-21D-1855-08	Lung	WGS	BI	1323114561	891163	101	05-4396-10A	WGS	BI	1113357820	959283	101	0	0.00365	0	0
5505	TCGA-05-4397-01A-01D-1931-08	Lung	WGS	BI	1053865102	2464507	101	05-4397-10A	WGS	BI	1051459671	1349832	101	0.00438	0.01229	0	0.00154
5506	TCGA-05-4398-01A-01D-1931-08	Lung	WGS	BI	1480480369	3749618	101	05-4398-10A	WGS	BI	1923724293	1631344	101	0.00262	0.00765	0.00055	0.00369
5507	TCGA-05-4389-01A-01D-1931-08	Lung	WGS	BI	1032393360	3671465	101	05-4389-10A	WGS	BI	1296612465	1316199	101	0	0.0018	0	0
5509	TCGA-AG-3574-01A-01D-1989-10	Colorectal	WGS	BCM	896533496	5728100	101	AG-3574-10A	WGS	BCM	1000878339	1772651	101	0	0	0.00401	0.01902

## Sheet: Late_metastatic_relapse
	index	primary tissue	primary sample	metastatic (or relapse) sample	SeqCenter(Tumour)
	42	prostate	PD11328e	PD11328a	CGP
	42	prostate	PD11328e	PD11328c	CGP
	42	prostate	PD11328e	PD11328d	CGP
	44	prostate	PD11330c	PD11330a	CGP
	45	prostate	PD11331c	PD11331a	CGP
	45	prostate	PD11331c	PD11331d	CGP
	45	prostate	PD11331c	PD11331e	CGP
	45	prostate	PD11331c	PD11331f	CGP
	46	prostate	PD11332c	PD11332a	CGP
	46	prostate	PD11332c	PD11332d	CGP
	46	prostate	PD11332c	PD11332e	CGP
	46	prostate	PD11332c	PD11332f	CGP
	95	colorectal	PD12354a	PD12354c	CGP
	96	colorectal	PD12355a	PD12355c	CGP
	97	colorectal	PD12356a	PD12356c	CGP
	98	colorectal	PD12357a	PD12357c	CGP
	99	colorectal	PD12358a	PD12358d	CGP
	100	colorectal	PD12359a	PD12359c	CGP
	101	colorectal	PD12360a	PD12360c	CGP
	102	colorectal	PD12361a	PD12361c	CGP
	103	colorectal	PD12362a	PD12362c	CGP
	104	colorectal	PD12363a	PD12363c	CGP
	105	colorectal	PD12364a	PD12364c	CGP
	105	colorectal	PD12364a	PD12364e	CGP
	106	colorectal	PD12366a	PD12366c	CGP
	107	colorectal	PD12367a	PD12367c	CGP
	161	colorectal	PD12846a	PD12846c	CGP
	162	colorectal	PD12847a	PD12847c	CGP
	163	colorectal	PD12848a	PD12848c	CGP
	164	colorectal	PD12849a	PD12849c	CGP
	165	colorectal	PD12850a	PD12850c	CGP
	166	colorectal	PD12851a	PD12851c	CGP
	167	colorectal	PD12853a	PD12853c	CGP
	168	colorectal	PD12854a	PD12854c	CGP
	170	colorectal	PD13336a	PD13336c	CGP
	475	multiple myeloma	PD4283a	PD4283c	CGP
	476	multiple myeloma	PD4284c	PD4284a	CGP
	477	multiple myeloma	PD4285a	PD4285c	CGP
	478	multiple myeloma	PD4286a	PD4286c	CGP
	479	multiple myeloma	PD4288a	PD4288c	CGP
	480	multiple myeloma	PD4289a	PD4289c	CGP
	480	multiple myeloma	PD4289a	PD4289d	CGP
	482	multiple myeloma	PD4291a	PD4291c	CGP
	483	multiple myeloma	PD4292d	PD4292a	CGP
	483	multiple myeloma	PD4292d	PD4292c	CGP
	484	multiple myeloma	PD4293a	PD4293c	CGP
	485	multiple myeloma	PD4294a	PD4294c	CGP
	486	multiple myeloma	PD4295a	PD4295c	CGP
	487	multiple myeloma	PD4296a	PD4296c	CGP
	488	multiple myeloma	PD4299a	PD4299c	CGP
	489	multiple myeloma	PD4300a	PD4300c	CGP
	490	multiple myeloma	PD4301a	PD4301d	CGP
	1047	colorectal	PD7252a	PD7252c	CGP
	1048	colorectal	PD7253a	PD7253c	CGP
	1049	colorectal	PD7254a	PD7254c	CGP
	1050	colorectal	PD7255a	PD7255c	CGP
	1051	colorectal	PD7256a	PD7256c	CGP
	1052	colorectal	PD7257a	PD7257c	CGP
	1053	colorectal	PD7258a	PD7258c	CGP
	1054	colorectal	PD7259a	PD7259c	CGP
	1055	colorectal	PD7260a	PD7260c	CGP
	1056	colorectal	PD7261a	PD7261c	CGP
	1057	colorectal	PD7262a	PD7262c	CGP
	1058	colorectal	PD7263a	PD7263c	CGP
	1191	colorectal	PD7605a	PD7605f	CGP
	1239	colorectal	PD8834a	PD8834c	CGP
	1282	colorectal	PD9061a	PD9061c	CGP
	1291	colorectal	PD9196a	PD9196c	CGP
	1375	breast	PD9769c	PD9769a	CGP
	1376	breast	PD9770c	PD9770a	CGP
	1377	breast	PD9771a	PD9771d	CGP
	1377	breast	PD9771a	PD9771e	CGP
	1383	breast	PD9777a	PD9777d	CGP
