# Supplementary material for: Origins and functional consequences of somatic mitochondrial DNA mutations in human cancer
Source: eLife journal article supplement (doi:10.7554/elife.02935), 2014-09-30
Supplement: supp [file elife-02935-supp-v1.zip › elife_poa_e02935_Supplementary_File_3.xlsx]

## Sheet: Phasing
						by single-end read				by paired-end read
index	sample	Subs1_pos	Subs1_info (signature,#wt,#mut,VAF)	Subs2_pos	Subs2_info (signature,#wt,#mut,VAF)	#wt1-wt2	#subs1-wt2	#wt1-subs2	#subs1-subs2	#wt1-wt2	#subs1-wt2	#wt1-subs2	#subs1-subs2	Final Category D(different),C(co-clonal),S(sub-clonal)
15	PD10010a	1806	T>C,14499|1612|10.01%	2300	G>A,9106|5497|37.64%	0	0	0	0	176	26	146	0	D
50	PD11336a	9489	G>A,4688|5933|55.86%	9594	C>T,10057|602|5.65%	0	0	0	0	37	51	0	5	S
60	PD11374a	14760	G>A,4812|1149|19.28%	15246	G>A,1879|3340|64%	0	0	0	0	65	1	86	31	S
60	PD11374a	15246	G>A,1879|3340|64%	15315	C>T,4104|845|17.07%	655	823	1	369	161	160	0	98	S
62	PD11376a	12814	G>A,3496|14612|80.69%	13249	T>C,18704|728|3.75%	0	0	0	0	511	2436	2	109	S
65	PD11380a	14861	G>A,9076|4268|31.98%	15150	G>A,7370|6620|47.32%	0	0	0	0	511	961	1304	13	D
69	PD11384a	1496	T>C,4179|4281|50.6%	1913	G>A,8148|346|4.07%	0	0	0	0	468	510	52	0	D
131	PD12813a	11799	G>A,23308|2142|8.42%	11937	T>C,6517|18834|74.29%	0	0	0	0	1005	1	2516	314	S
154	PD12837a	1249	T>C,8432|1123|11.75%	1415	G>A,3429|6962|67%	0	0	0	0	944	0	1473	332	S
159	PD12844a	15153	G>A,630|21759|97.19%	15375	G>A,14231|7703|35.12%	0	0	0	0	109	2200	1	1204	S
173	PD13381a	2721	G>A,10707|2085|16.3%	3080	G>A,12454|1753|12.34%	0	0	0	0	357	80	61	0	D
180	PD13389a	723	A>G,5416|286|5.02%	1175	G>A,4592|1788|28.03%	0	0	0	0	15	2	7	0	D
200	PD13411a	4969	G>A,20412|1407|6.45%	5105	T>C,19009|4166|17.98%	0	0	0	0	2425	3	356	188	S
379	PD4069a	528	T>C,881|8727|90.83%	859	T>C,1103|11852|91.49%	0	0	0	0	168	17	4	1732	C
384	PD4080a	7056	G>A,9312|4000|30.05%	7595	G>A,14237|3643|20.37%	0	0	0	0	94	71	41	1	D
387	PD4085a	13300	C>T,6820|458|6.29%	13635	T>C,4774|1979|29.31%	0	0	0	0	919	107	426	4	D
388	PD4086a	3776	G>A,1862|3910|67.74%	4429	G>A,1334|2868|68.25%	0	0	0	0	0	0	0	1	C
447	PD4202a	8523	C>A,41|4|8.89%	8612	T>C,29|12|29.27%	0	0	0	0	2	0	2	1	S
447	PD4202a	11455	C>A,41|4|8.89%	11483	G>T,43|4|8.51%	16	2	0	0	2	1	1	0	D
457	PD4255a	234	A>G,1101|3784|77.46%	268	C>T,4372|136|3.02%	871	3167	4	158	5	33	0	4	S
457	PD4255a	268	C>T,4372|136|3.02%	625	G>A,6314|3835|37.79%	0	0	0	0	351	2	173	9	S
458	PD4261a	7734	T>C,6430|5311|45.23%	8200	T>C,9436|4243|31.02%	0	0	0	0	125	215	146	1	D
504	PD4605a	12775	G>A,4148|12211|74.64%	12823	G>A,12861|2187|14.53%	1941	4952	13	1156	14	30	0	11	S
525	PD4826a	15544	C>T,12020|2922|19.56%	15756	G>A,13171|1289|8.91%	0	0	0	0	1910	549	245	8	D
534	PD4847a	307	C>A,982|293|22.98%	346	T>C,1069|488|31.34%	656	5	22	0	18	0	0	0	D
535	PD4848b	2121	G>A,588|471|44.48%	2345	G>A,992|120|10.79%	0	0	0	0	16	5	0	1	S
655	PD4986a	1999	A>G,8004|876|9.86%	2098	G>A,2364|8119|77.45%	0	0	0	0	243	1	703	85	S
681	PD5853a	1007	G>A,21|10|32.26%	1082	A>G,13|7|35%	0	0	0	0	5	5	4	0	D
687	PD5859a	12725	T>C,34|5|12.82%	12908	T>C,13|38|74.51%	0	0	0	0	1	1	5	0	D
722	PD5894a	11642	G>A,21|15|41.67%	11814	T>C,5|41|89.13%	0	0	0	0	1	0	3	1	S
722	PD5894a	11814	T>C,5|41|89.13%	11865	T>C,24|15|38.46%	2	4	0	4	0	4	0	2	S
754	PD5935a	14439	G>A,1662|7827|82.48%	14686	G>A,8676|838|8.81%	0	0	0	0	284	1213	0	150	S
759	PD5944a	3579	A>C,2053|85|3.98%	3803	T>C,9262|408|4.22%	0	0	0	0	198	2	10	0	D
759	PD5944a	6480	G>A,8620|822|8.71%	6798	G>C,8560|598|6.53%	0	0	0	0	1694	186	177	3	D
765	PD5951a	3066	C>A,15204|1967|11.46%	3188	T>C,15506|2517|13.97%	0	0	0	0	371	73	57	0	D
765	PD5951a	14721	G>A,7940|11417|58.98%	15323	G>A,16106|2209|12.06%	0	0	0	0	292	319	3	82	S
854	PD6406a	3433	T>C,3277|6035|64.81%	3502	T>C,3858|5146|57.15%	874	246	5	1324	174	32	0	217	S
866	PD6422a	11652	T>C,6016|13617|69.36%	12067	C>T,5997|13563|69.34%	0	0	0	0	830	11	7	1791	C
886	PD6647a2	5391	T>G,10|3|23.08%	5473	T>C,10|3|23.08%	0	0	0	0	4	0	0	2	C
889	PD6669a	10406	G>A,2271|188|7.65%	10448	T>C,1887|838|30.75%	66	6	31	0	0	0	0	0	D
986	PD7156a	11858	C>T,134|5|3.6%	11887	G>A,132|11|7.69%	63	3	10	0	20	2	1	0	D
1012	PD7192a	10722	T>C,3287|13655|80.6%	10971	G>A,15221|1079|6.62%	0	0	0	0	597	2146	2	205	S
1105	PD7355a	3022	G>A,1356|20699|93.85%	3255	G>A,17244|4477|20.61%	0	0	0	0	303	3386	2	963	S
1119	PD7407a	13063	G>A,8741|282|3.13%	13153	A>G,7728|2128|21.59%	293	4	78	0	38	3	11	0	D
1252	PD8973a	834	G>A,7055|224|3.08%	1285	G>A,3363|4705|58.32%	0	0	0	0	59	0	79	5	D
1254	PD8979a	13198	G>A,10776|1013|8.59%	13496	C>A,10381|604|5.5%	0	0	0	0	1398	132	94	0	D
1283	PD9168a	16278	C>T,3153|220|6.52%	16519	T>C,1922|109|5.37%	0	0	0	0	13	1	1	0	D
1286	PD9171a	3380	G>A,16198|1221|7.01%	3531	G>A,13742|2308|14.38%	0	0	0	0	22	0	1	1	S
1307	PD9539a	16293	A>G,2426|257|9.58%	16390	G>A,641|1768|73.39%	0	0	0	0	14	0	32	4	S
1315	PD9572a	8269	G>C,6332|207|3.17%	8290	G>C,5712|347|5.73%	3659	52	252	0	7	0	0	0	D
1317	PD9574a	6724	T>C,9913|636|6.03%	7191	T>C,10518|686|6.12%	0	0	0	0	187	0	3	14	S
1319	PD9577a	174	C>T,10390|353|3.29%	403	T>C,11806|8549|42%	0	0	0	0	2116	6	1448	125	S
1319	PD9577a	403	T>C,11806|8549|42%	414	T>C,18384|1789|8.87%	8651	7312	1549	72	19	32	3	0	D
1319	PD9577a	414	T>C,18384|1789|8.87%	564	G>A,3161|19333|85.95%	0	0	0	0	145	4	687	90	S
1319	PD9577a	564	G>A,3161|19333|85.95%	678	T>C,3707|21131|85.08%	0	0	0	0	53	0	6	255	C
1379	PD9773a	189	A>G,1011|74|6.82%	215	A>G,765|332|30.26%	764	7	282	82	11	0	8	0	S
5038	36-2543-01A	237	A>G,2|47|95.92%	296	C>T,0|23|100%	1	0	0	13	0	0	0	4	C
5050	36-2538-01A	4136	A>G,11|4|26.67%	4226	T>C,2|32|94.12%	0	0	0	0	1	0	2	2	S
5059	BF-A1PX-01A	4822	T>C,181|162|47.23%	5177	G>A,226|198|46.7%	0	0	0	0	12	0	0	12	C
5077	CC-A3M9-01A	16343	A>G,9|5|35.71%	16355	C>T,6|7|53.85%	5	0	2	5	1	0	0	1	S
5101	BC-4073-01B	61	C>A,7|22|75.86%	94	G>A,10|42|80.77%	7	0	0	31	1	0	0	11	S
5106	G3-A25V-01A	343	C>T,190|64|25.2%	556	A>G,216|459|68%	0	0	0	0	3	0	4	4	S
5121	BG-A186-01A	6372	T>C,736|115|13.51%	6564	G>A,794|95|10.69%	0	0	0	0	25	4	5	0	D
5126	A5-A0GQ-01A	12713	T>C,0|8|100%	12725	T>C,0|9|100%	0	0	0	8	0	0	0	1	C
5141	B5-A0K9-01A	13424	T>C,41|276|87.07%	13602	T>C,37|240|86.64%	0	0	0	0	3	0	0	30	C
5178	CQ-6223-01A	5325	A>C,122|730|85.68%	5819	T>C,176|873|83.22%	0	0	0	0	3	0	0	10	C
5205	G2-A2EC-01A	4499	C>A,180|846|82.46%	4563	G>A,189|938|83.23%	0	0	0	0	2	0	0	3	C
5347	A6-6138-01A	6016	G>A,105|287|73.21%	6333	G>A,104|252|70.79%	0	0	0	0	0	0	0	4	C
5410	75-6206-01A	12697	C>A,1276|232|15.38%	13042	G>A,103|1069|91.21%	0	0	0	0	8	0	37	8	S
5473	C5-A2LT-01A	10953	T>C,35|11|23.91%	10964	A>G,13|33|71.74%	13	0	23	0	3	0	2	4	S
5489	DG-A2KM-01A	14766	C>T,92|21|18.58%	14810	C>T,73|18|19.78%	21	10	12	0	13	8	7	0	D
5504	05-4396-01A	3698	G>A,3695|557|13.1%	3778	G>A,2445|1553|38.84%	292	87	253	0	170	53	121	1	D
