# Supplementary material for: Origins and functional consequences of somatic mitochondrial DNA mutations in human cancer
Source: eLife journal article supplement (doi:10.7554/elife.02935), 2014-09-30
Supplement: supp [file elife-02935-supp-v1.zip › elife_poa_e02935_Supplementary_File_4.xls]

## Sheet: Sheet 1 - Table 1
gene_name	n_syn	n_mis	n_non	wMIS	wNON	pMIS	pNON	qMIS	qNON	t_Est
MT-ND2	16	74	12	1.62238	2.86139	0.0650077	0.00848163	0.451508	0.110261	8.49044e-12
MT-CO2	18	48	1	0.824114	0.266732	0.490574	0.114425	0.751271	0.67775
MT-ND5	29	152	8	1.33684	0.933578	0.138925	0.862479	0.451508	1	1.10463e-11
MT-CO1	20	118	10	1.45304	1.11659	0.106517	0.777227	0.451508	1	7.79897e-12
MT-ND4	23	118	7	1.39848	1.01618	0.126803	0.970388	0.451508	1	1.1235e-11
MT-ND1	26	86	3	0.842408	0.397165	0.450624	0.0875597	0.751271	0.35204
MT-ATP6	8	39	0	1.55715	0	0.231609	0.0922939	0.501819	1	7.36095e-12
MT-ND3	4	26	1	1.91396	0.92788	0.191512	0.946223	1	1
MT-ND4L	6	23	0	1.15302	0	0.752844	0.23224	1	1
MT-CO3	21	59	10	0.838046	1.09794	0.493094	0.80892	0.953578	0.425207
MT-ATP8	1	3	0	1.83589	0	0.581941	0.523566	1	1
MT-CYB	24	107	11	1.04758	1.00849	0.836167	0.98149	1	1	1.49618e-11
