# Supplementary material for: Origins and functional consequences of somatic mitochondrial DNA mutations in human cancer
Source: eLife journal article supplement (doi:10.7554/elife.02935), 2014-09-30
Supplement: supp [file elife-02935-supp-v1.zip › elife_poa_e02935_Supplementary_File_5.xlsx]

## Sheet: Significantly_recurrent_mutatio
chr	pos	ref	mut	recurrence	trinuc_ref	trinuc_mut	exp_rate	pval	qval	annotation
MT	11711	G	A	11	CGC	CAC	0.593553	4.68881e-11	1.10984e-07	nsSNP,MT-ND4,MT-ND4,exon1,A318T,0,5;
MT	2623	A	G	5	GAC	GGC	0.0720985	1.5289e-08	2.53323e-05	ncUTR,MT-RNR2,MT-RNR2,exon1,,,1;
MT	3380	G	A	5	CGA	CAA	0.3446	3.04229e-05	0.0193876	nsSNP,MT-ND1,MT-ND1,exon1,R25Q,1,5;
MT	3800	T	C	5	CTT	CCT	0.0917277	5.01373e-08	7.15913e-05	nsSNP,MT-ND1,MT-ND1,exon1,L165P,-4,5;
MT	15944	T	C	4	TTC	TCC	0.076691	1.35568e-06	0.00106963	ncUTR,MT-TT,MT-TT,exon1,T-stem2,4/5,1;LocInfo,MT-ATT,MT-ATT,segment1,,,1;
MT	13676	A	G	3	AAC	AGC	0.0397477	1.0159e-05	0.00673297	nsSNP,MT-ND5,MT-ND5,exon1,N447S,0,1;
MT	4123	A	G	2	AAT	AGT	0.0141263	9.88418e-05	0.0454919	nsSNP,MT-ND1,MT-ND1,exon1,I273V,3,5;
MT	10306	A	C	2	AAC	ACC	0.0109583	5.96057e-05	0.0299275	nsSNP,MT-ND3,MT-ND3,exon1,N83T,0,5;
MT	14233	A	G	2	AAT	AGT	0.0141263	9.88418e-05	0.0454919	synSNP,MT-ND6,MT-ND6,exon1,D147D,7,1;
MT	15946	C	A	2	CCA	CAA	0.00914076	4.1523e-05	0.0245712	ncUTR,MT-TT,MT-TT,exon1,Acc-stem2,1/7,1;LocInfo,MT-ATT,MT-ATT,segment1,,,1;
