# Supplementary material for: Origins and functional consequences of somatic mitochondrial DNA mutations in human cancer
Source: eLife journal article supplement (doi:10.7554/elife.02935), 2014-09-30
Supplement: supp [file elife-02935-supp-v1.zip › elife_poa_e02935_Supplementary_File_6.xlsx]

## Sheet: Accessions
index	sample_ID	type	Study ID	Sample ID	Experiment ID	Run ID
15	PD10010a	tumour	EGAS00001000968	EGAN00001087642	EGAX00001218724	EGAR00001232289
16	PD10014a	tumour	EGAS00001000968	EGAN00001226012	EGAX00001218726	EGAR00001232291
18	PD10020a	tumour	EGAS00001000968	EGAN00001226014	EGAX00001218728	EGAR00001232293
19	PD10021a	tumour	EGAS00001000968	EGAN00001226016	EGAX00001218730	EGAR00001232295
20	PD10022a	tumour	EGAS00001000968	EGAN00001226018	EGAX00001218732	EGAR00001232297
21	PD10051a	tumour	EGAS00001000968	EGAN00001072466	EGAX00001218734	EGAR00001232299
22	PD10052a	tumour	EGAS00001000968	EGAN00001072478	EGAX00001218736	EGAR00001232301
23	PD10053a	tumour	EGAS00001000968	EGAN00001072467	EGAX00001218738	EGAR00001232303
24	PD10054a	tumour	EGAS00001000968	EGAN00001072468	EGAX00001218740	EGAR00001232305
25	PD10055a	tumour	EGAS00001000968	EGAN00001072479	EGAX00001218742	EGAR00001232307
26	PD10056a	tumour	EGAS00001000968	EGAN00001072470	EGAX00001218744	EGAR00001232309
27	PD10057a	tumour	EGAS00001000968	EGAN00001072471	EGAX00001218746	EGAR00001232311
28	PD10058a	tumour	EGAS00001000968	EGAN00001072472	EGAX00001218748	EGAR00001232313
29	PD10059a	tumour	EGAS00001000968	EGAN00001072473	EGAX00001218750	EGAR00001232315
30	PD10060a	tumour	EGAS00001000968	EGAN00001072474	EGAX00001218752	EGAR00001232317
31	PD10061a	tumour	EGAS00001000968	EGAN00001072475	EGAX00001218754	EGAR00001232319
32	PD10062a	tumour	EGAS00001000968	EGAN00001072476	EGAX00001218756	EGAR00001232321
33	PD10063a	tumour	EGAS00001000968	EGAN00001072477	EGAX00001218758	EGAR00001232323
35	PD11290a	tumour	EGAS00001000968	EGAN00001085159	EGAX00001218760	EGAR00001232325
36	PD11291a	tumour	EGAS00001000968	EGAN00001085171	EGAX00001218762	EGAR00001232327
37	PD11292a	tumour	EGAS00001000968	EGAN00001085161	EGAX00001218764	EGAR00001232329
38	PD11293a	tumour	EGAS00001000968	EGAN00001085162	EGAX00001218766	EGAR00001232331
39	PD11294a	tumour	EGAS00001000968	EGAN00001085163	EGAX00001218768	EGAR00001232333
40	PD11295a	tumour	EGAS00001000968	EGAN00001085164	EGAX00001218770	EGAR00001232335
42	PD11328e	tumour	EGAS00001000968	EGAN00001226021	EGAX00001218773	EGAR00001232338
43	PD11329a	tumour	EGAS00001000968	EGAN00001226022	EGAX00001218774	EGAR00001232339
44	PD11330c	tumour	EGAS00001000968	EGAN00001226025	EGAX00001218777	EGAR00001232342
45	PD11331c	tumour	EGAS00001000968	EGAN00001226027	EGAX00001218779	EGAR00001232344
46	PD11332c	tumour	EGAS00001000968	EGAN00001226029	EGAX00001218781	EGAR00001232346
47	PD11333a	tumour	EGAS00001000968	EGAN00001226030	EGAX00001218782	EGAR00001232347
48	PD11334a	tumour	EGAS00001000968	EGAN00001226032	EGAX00001218784	EGAR00001232349
49	PD11335a	tumour	EGAS00001000968	EGAN00001226034	EGAX00001218786	EGAR00001232351
50	PD11336a	tumour	EGAS00001000968	EGAN00001087644	EGAX00001218788	EGAR00001232353
51	PD11337a	tumour	EGAS00001000968	EGAN00001087645	EGAX00001218790	EGAR00001232355
52	PD11338a	tumour	EGAS00001000968	EGAN00001087646	EGAX00001218792	EGAR00001232357
53	PD11339a	tumour	EGAS00001000968	EGAN00001087647	EGAX00001218794	EGAR00001232359
54	PD11340a	tumour	EGAS00001000968	EGAN00001087648	EGAX00001218796	EGAR00001232361
55	PD11341a	tumour	EGAS00001000968	EGAN00001087649	EGAX00001218798	EGAR00001232363
56	PD11342a	tumour	EGAS00001000968	EGAN00001087650	EGAX00001218800	EGAR00001232365
57	PD11343a	tumour	EGAS00001000968	EGAN00001087651	EGAX00001218802	EGAR00001232367
58	PD11369a	tumour	EGAS00001000968	EGAN00001088407	EGAX00001218804	EGAR00001232369
59	PD11372a	tumour	EGAS00001000968	EGAN00001088408	EGAX00001218806	EGAR00001232371
60	PD11374a	tumour	EGAS00001000968	EGAN00001088409	EGAX00001218808	EGAR00001232373
61	PD11375a	tumour	EGAS00001000968	EGAN00001088410	EGAX00001218810	EGAR00001232375
62	PD11376a	tumour	EGAS00001000968	EGAN00001088411	EGAX00001218812	EGAR00001232377
63	PD11377a	tumour	EGAS00001000968	EGAN00001088412	EGAX00001218814	EGAR00001232379
64	PD11379a	tumour	EGAS00001000968	EGAN00001088414	EGAX00001218816	EGAR00001232381
65	PD11380a	tumour	EGAS00001000968	EGAN00001088415	EGAX00001218818	EGAR00001232383
66	PD11381a	tumour	EGAS00001000968	EGAN00001088416	EGAX00001218820	EGAR00001232385
67	PD11382a	tumour	EGAS00001000968	EGAN00001088417	EGAX00001218822	EGAR00001232387
68	PD11383a	tumour	EGAS00001000968	EGAN00001088418	EGAX00001218824	EGAR00001232389
69	PD11384a	tumour	EGAS00001000968	EGAN00001088419	EGAX00001218826	EGAR00001232391
70	PD11385a	tumour	EGAS00001000968	EGAN00001088420	EGAX00001218828	EGAR00001232393
71	PD11389a	tumour	EGAS00001000968	EGAN00001088421	EGAX00001218830	EGAR00001232395
72	PD11390a	tumour	EGAS00001000968	EGAN00001088422	EGAX00001218832	EGAR00001232397
73	PD11391a	tumour	EGAS00001000968	EGAN00001092759	EGAX00001218834	EGAR00001232399
74	PD11394a	tumour	EGAS00001000968	EGAN00001088423	EGAX00001218836	EGAR00001232401
75	PD11396a	tumour	EGAS00001000968	EGAN00001088424	EGAX00001218838	EGAR00001232403
76	PD11398a	tumour	EGAS00001000968	EGAN00001088425	EGAX00001218840	EGAR00001232405
77	PD11399a	tumour	EGAS00001000968	EGAN00001088426	EGAX00001218842	EGAR00001232407
78	PD11403a	tumour	EGAS00001000968	EGAN00001226036	EGAX00001218844	EGAR00001232409
79	PD11404a	tumour	EGAS00001000968	EGAN00001226038	EGAX00001218846	EGAR00001232411
80	PD11405a	tumour	EGAS00001000968	EGAN00001226040	EGAX00001218848	EGAR00001232413
81	PD11406a	tumour	EGAS00001000968	EGAN00001088294	EGAX00001218850	EGAR00001232415
82	PD11411a	tumour	EGAS00001000968	EGAN00001096866	EGAX00001218852	EGAR00001232417
84	PD11421a	tumour	EGAS00001000968	EGAN00001096869	EGAX00001218854	EGAR00001232419
85	PD11424a	tumour	EGAS00001000968	EGAN00001096870	EGAX00001218856	EGAR00001232421
86	PD11471a	tumour	EGAS00001000968	EGAN00001088297	EGAX00001218858	EGAR00001232423
87	PD11781a	tumour	EGAS00001000968	EGAN00001074742	EGAX00001218860	EGAR00001232425
88	PD11783a	tumour	EGAS00001000968	EGAN00001074727	EGAX00001218862	EGAR00001232427
89	PD11795a	tumour	EGAS00001000968	EGAN00001074707	EGAX00001218864	EGAR00001232429
90	PD11800a	tumour	EGAS00001000968	EGAN00001074715	EGAX00001218866	EGAR00001232431
91	PD11818a	tumour	EGAS00001000968	EGAN00001088404	EGAX00001218868	EGAR00001232433
92	PD11819a	tumour	EGAS00001000968	EGAN00001088405	EGAX00001218870	EGAR00001232435
93	PD12330a	tumour	EGAS00001000968	EGAN00001096383	EGAX00001218872	EGAR00001232437
94	PD12337a	tumour	EGAS00001000968	EGAN00001226042	EGAX00001218874	EGAR00001232439
95	PD12354a	tumour	EGAS00001000968	EGAN00001094622	EGAX00001218876	EGAR00001232441
97	PD12356a	tumour	EGAS00001000968	EGAN00001094626	EGAX00001218878	EGAR00001232443
98	PD12357a	tumour	EGAS00001000968	EGAN00001094628	EGAX00001218880	EGAR00001232445
99	PD12358a	tumour	EGAS00001000968	EGAN00001094630	EGAX00001218882	EGAR00001232447
100	PD12359a	tumour	EGAS00001000968	EGAN00001094633	EGAX00001218884	EGAR00001232449
101	PD12360a	tumour	EGAS00001000968	EGAN00001097397	EGAX00001218886	EGAR00001232451
102	PD12361a	tumour	EGAS00001000968	EGAN00001094636	EGAX00001218888	EGAR00001232453
103	PD12362a	tumour	EGAS00001000968	EGAN00001094638	EGAX00001218890	EGAR00001232455
104	PD12363a	tumour	EGAS00001000968	EGAN00001097401	EGAX00001218892	EGAR00001232457
105	PD12364a	tumour	EGAS00001000968	EGAN00001094641	EGAX00001218894	EGAR00001232459
106	PD12366a	tumour	EGAS00001000968	EGAN00001097398	EGAX00001218896	EGAR00001232461
107	PD12367a	tumour	EGAS00001000968	EGAN00001094645	EGAX00001218898	EGAR00001232463
108	PD12370a	tumour	EGAS00001000968	EGAN00001096056	EGAX00001218900	EGAR00001232465
109	PD12430a	tumour	EGAS00001000968	EGAN00001096057	EGAX00001218902	EGAR00001232467
110	PD12431a	tumour	EGAS00001000968	EGAN00001096058	EGAX00001218904	EGAR00001232469
111	PD12435a	tumour	EGAS00001000968	EGAN00001096059	EGAX00001218906	EGAR00001232471
112	PD12445a	tumour	EGAS00001000968	EGAN00001096061	EGAX00001218908	EGAR00001232473
113	PD12446a	tumour	EGAS00001000968	EGAN00001096062	EGAX00001218910	EGAR00001232475
114	PD12447a	tumour	EGAS00001000968	EGAN00001096060	EGAX00001218912	EGAR00001232477
115	PD12448a	tumour	EGAS00001000968	EGAN00001096063	EGAX00001218914	EGAR00001232479
116	PD12449a	tumour	EGAS00001000968	EGAN00001096064	EGAX00001218916	EGAR00001232481
117	PD12453a	tumour	EGAS00001000968	EGAN00001096066	EGAX00001218918	EGAR00001232483
118	PD12454a	tumour	EGAS00001000968	EGAN00001096065	EGAX00001218920	EGAR00001232485
119	PD12455a	tumour	EGAS00001000968	EGAN00001096067	EGAX00001218922	EGAR00001232487
120	PD12456a	tumour	EGAS00001000968	EGAN00001096068	EGAX00001218924	EGAR00001232489
121	PD12458a	tumour	EGAS00001000968	EGAN00001096069	EGAX00001218926	EGAR00001232491
122	PD12461a	tumour	EGAS00001000968	EGAN00001096070	EGAX00001218928	EGAR00001232493
123	PD12462a	tumour	EGAS00001000968	EGAN00001096071	EGAX00001218930	EGAR00001232495
125	PD12807a	tumour	EGAS00001000968	EGAN00001226044	EGAX00001218932	EGAR00001232497
127	PD12809a	tumour	EGAS00001000968	EGAN00001226046	EGAX00001218934	EGAR00001232499
129	PD12811a	tumour	EGAS00001000968	EGAN00001226048	EGAX00001218936	EGAR00001232501
130	PD12812a	tumour	EGAS00001000968	EGAN00001226050	EGAX00001218938	EGAR00001232503
131	PD12813a	tumour	EGAS00001000968	EGAN00001226052	EGAX00001218940	EGAR00001232505
132	PD12814a	tumour	EGAS00001000968	EGAN00001226054	EGAX00001218942	EGAR00001232507
133	PD12815a	tumour	EGAS00001000968	EGAN00001226056	EGAX00001218944	EGAR00001232509
134	PD12816a	tumour	EGAS00001000968	EGAN00001226058	EGAX00001218946	EGAR00001232511
135	PD12817a	tumour	EGAS00001000968	EGAN00001226060	EGAX00001218948	EGAR00001232513
136	PD12818a	tumour	EGAS00001000968	EGAN00001226062	EGAX00001218950	EGAR00001232515
137	PD12819a	tumour	EGAS00001000968	EGAN00001226064	EGAX00001218952	EGAR00001232517
138	PD12820a	tumour	EGAS00001000968	EGAN00001226066	EGAX00001218954	EGAR00001232519
139	PD12821a	tumour	EGAS00001000968	EGAN00001226068	EGAX00001218956	EGAR00001232521
140	PD12822a	tumour	EGAS00001000968	EGAN00001226070	EGAX00001218958	EGAR00001232523
141	PD12823a	tumour	EGAS00001000968	EGAN00001226072	EGAX00001218960	EGAR00001232525
142	PD12824a	tumour	EGAS00001000968	EGAN00001226074	EGAX00001218962	EGAR00001232527
143	PD12825a	tumour	EGAS00001000968	EGAN00001226076	EGAX00001218964	EGAR00001232529
144	PD12826a	tumour	EGAS00001000968	EGAN00001226078	EGAX00001218966	EGAR00001232531
145	PD12827a	tumour	EGAS00001000968	EGAN00001226080	EGAX00001218968	EGAR00001232533
146	PD12828a	tumour	EGAS00001000968	EGAN00001226082	EGAX00001218970	EGAR00001232535
147	PD12829a	tumour	EGAS00001000968	EGAN00001226084	EGAX00001218972	EGAR00001232537
148	PD12830a	tumour	EGAS00001000968	EGAN00001226086	EGAX00001218974	EGAR00001232539
150	PD12832a	tumour	EGAS00001000968	EGAN00001226088	EGAX00001218976	EGAR00001232541
151	PD12834a	tumour	EGAS00001000968	EGAN00001226090	EGAX00001218978	EGAR00001232543
152	PD12835a	tumour	EGAS00001000968	EGAN00001226092	EGAX00001218980	EGAR00001232545
153	PD12836a	tumour	EGAS00001000968	EGAN00001226094	EGAX00001218982	EGAR00001232547
154	PD12837a	tumour	EGAS00001000968	EGAN00001226096	EGAX00001218984	EGAR00001232549
155	PD12838a	tumour	EGAS00001000968	EGAN00001226098	EGAX00001218986	EGAR00001232551
156	PD12839a	tumour	EGAS00001000968	EGAN00001226100	EGAX00001218988	EGAR00001232553
159	PD12844a	tumour	EGAS00001000968	EGAN00001226102	EGAX00001218990	EGAR00001232555
160	PD12845a	tumour	EGAS00001000968	EGAN00001226104	EGAX00001218992	EGAR00001232557
161	PD12846a	tumour	EGAS00001000968	EGAN00001094647	EGAX00001218994	EGAR00001232559
162	PD12847a	tumour	EGAS00001000968	EGAN00001094649	EGAX00001218996	EGAR00001232561
163	PD12848a	tumour	EGAS00001000968	EGAN00001097400	EGAX00001218998	EGAR00001232563
164	PD12849a	tumour	EGAS00001000968	EGAN00001097402	EGAX00001219000	EGAR00001232565
165	PD12850a	tumour	EGAS00001000968	EGAN00001094652	EGAX00001219002	EGAR00001232567
166	PD12851a	tumour	EGAS00001000968	EGAN00001094654	EGAX00001219004	EGAR00001232569
167	PD12853a	tumour	EGAS00001000968	EGAN00001094656	EGAX00001219006	EGAR00001232571
168	PD12854a	tumour	EGAS00001000968	EGAN00001094658	EGAX00001219008	EGAR00001232573
170	PD13336a	tumour	EGAS00001000968	EGAN00001094661	EGAX00001219010	EGAR00001232575
173	PD13381a	tumour	EGAS00001000968	EGAN00001226106	EGAX00001219012	EGAR00001232577
174	PD13382a	tumour	EGAS00001000968	EGAN00001226108	EGAX00001219014	EGAR00001232579
175	PD13383a	tumour	EGAS00001000968	EGAN00001226110	EGAX00001219016	EGAR00001232581
176	PD13384a	tumour	EGAS00001000968	EGAN00001226112	EGAX00001219018	EGAR00001232583
177	PD13386a	tumour	EGAS00001000968	EGAN00001226114	EGAX00001219020	EGAR00001232585
178	PD13387a	tumour	EGAS00001000968	EGAN00001226116	EGAX00001219022	EGAR00001232587
179	PD13388a	tumour	EGAS00001000968	EGAN00001226118	EGAX00001219024	EGAR00001232589
180	PD13389a	tumour	EGAS00001000968	EGAN00001226120	EGAX00001219026	EGAR00001232591
181	PD13390a	tumour	EGAS00001000968	EGAN00001226122	EGAX00001219028	EGAR00001232593
182	PD13391a	tumour	EGAS00001000968	EGAN00001226124	EGAX00001219030	EGAR00001232595
183	PD13392a	tumour	EGAS00001000968	EGAN00001226126	EGAX00001219032	EGAR00001232597
184	PD13394a	tumour	EGAS00001000968	EGAN00001226128	EGAX00001219034	EGAR00001232599
185	PD13395a	tumour	EGAS00001000968	EGAN00001226130	EGAX00001219036	EGAR00001232601
186	PD13396a	tumour	EGAS00001000968	EGAN00001226132	EGAX00001219038	EGAR00001232603
187	PD13397a	tumour	EGAS00001000968	EGAN00001226134	EGAX00001219040	EGAR00001232605
188	PD13398a	tumour	EGAS00001000968	EGAN00001226136	EGAX00001219042	EGAR00001232607
189	PD13400a	tumour	EGAS00001000968	EGAN00001226138	EGAX00001219044	EGAR00001232609
191	PD13402a	tumour	EGAS00001000968	EGAN00001226140	EGAX00001219046	EGAR00001232611
192	PD13403a	tumour	EGAS00001000968	EGAN00001226142	EGAX00001219048	EGAR00001232613
193	PD13404a	tumour	EGAS00001000968	EGAN00001226144	EGAX00001219050	EGAR00001232615
194	PD13405a	tumour	EGAS00001000968	EGAN00001226146	EGAX00001219052	EGAR00001232617
195	PD13406a	tumour	EGAS00001000968	EGAN00001226148	EGAX00001219054	EGAR00001232619
196	PD13407a	tumour	EGAS00001000968	EGAN00001226150	EGAX00001219056	EGAR00001232621
197	PD13408a	tumour	EGAS00001000968	EGAN00001226152	EGAX00001219058	EGAR00001232623
198	PD13409a	tumour	EGAS00001000968	EGAN00001226154	EGAX00001219060	EGAR00001232625
199	PD13410a	tumour	EGAS00001000968	EGAN00001226156	EGAX00001219062	EGAR00001232627
200	PD13411a	tumour	EGAS00001000968	EGAN00001226158	EGAX00001219064	EGAR00001232629
201	PD13412a	tumour	EGAS00001000968	EGAN00001226160	EGAX00001219066	EGAR00001232631
203	PD2126a	tumour	EGAS00001000968	EGAN00001000657	EGAX00001219068	EGAR00001232633
204	PD2127a	tumour	EGAS00001000968	EGAN00001000659	EGAX00001219070	EGAR00001232635
205	PD2144a	tumour	EGAS00001000968	EGAN00001000661	EGAX00001219072	EGAR00001232637
206	PD2147a	tumour	EGAS00001000968	EGAN00001000803	EGAX00001219074	EGAR00001232639
207	PD2155a	tumour	EGAS00001000968	EGAN00001000807	EGAX00001219076	EGAR00001232641
208	PD2156a	tumour	EGAS00001000968	EGAN00001000829	EGAX00001219078	EGAR00001232643
209	PD2158a	tumour	EGAS00001000968	EGAN00001000834	EGAX00001219080	EGAR00001232645
210	PD2160a	tumour	EGAS00001000968	EGAN00001000836	EGAX00001219082	EGAR00001232647
211	PD2162a	tumour	EGAS00001000968	EGAN00001000838	EGAX00001219084	EGAR00001232649
212	PD2170a	tumour	EGAS00001000968	EGAN00001000809	EGAX00001219086	EGAR00001232651
213	PD2172a	tumour	EGAS00001000968	EGAN00001000811	EGAX00001219088	EGAR00001232653
214	PD2175a	tumour	EGAS00001000968	EGAN00001000813	EGAX00001219090	EGAR00001232655
215	PD2176a	tumour	EGAS00001000968	EGAN00001000815	EGAX00001219092	EGAR00001232657
216	PD2184a	tumour	EGAS00001000968	EGAN00001000817	EGAX00001219094	EGAR00001232659
217	PD2185a	tumour	EGAS00001000968	EGAN00001000651	EGAX00001219096	EGAR00001232661
218	PD2192a	tumour	EGAS00001000968	EGAN00001000820	EGAX00001219098	EGAR00001232663
219	PD2202a	tumour	EGAS00001000968	EGAN00001000822	EGAX00001219100	EGAR00001232665
220	PD2208a	tumour	EGAS00001000968	EGAN00001000824	EGAX00001219102	EGAR00001232667
221	PD2213a	tumour	EGAS00001000968	EGAN00001000826	EGAX00001219104	EGAR00001232669
222	PD2216a	tumour	EGAS00001000968	EGAN00001000828	EGAX00001219106	EGAR00001232671
223	PD3178a	tumour	EGAS00001000968	EGAN00001035893	EGAX00001219108	EGAR00001232673
224	PD3179a	tumour	EGAS00001000968	EGAN00001035894	EGAX00001219110	EGAR00001232675
225	PD3180a	tumour	EGAS00001000968	EGAN00001035895	EGAX00001219112	EGAR00001232677
226	PD3181a	tumour	EGAS00001000968	EGAN00001035896	EGAX00001219114	EGAR00001232679
227	PD3182a	tumour	EGAS00001000968	EGAN00001035897	EGAX00001219116	EGAR00001232681
228	PD3183a	tumour	EGAS00001000968	EGAN00001035912	EGAX00001219118	EGAR00001232683
229	PD3184a	tumour	EGAS00001000968	EGAN00001035899	EGAX00001219120	EGAR00001232685
230	PD3185a	tumour	EGAS00001000968	EGAN00001035900	EGAX00001219122	EGAR00001232687
231	PD3186a	tumour	EGAS00001000968	EGAN00001035901	EGAX00001219124	EGAR00001232689
232	PD3187a	tumour	EGAS00001000968	EGAN00001035902	EGAX00001219126	EGAR00001232691
233	PD3188a	tumour	EGAS00001000968	EGAN00001035903	EGAX00001219128	EGAR00001232693
234	PD3189a	tumour	EGAS00001000968	EGAN00001035904	EGAX00001219130	EGAR00001232695
235	PD3190a	tumour	EGAS00001000968	EGAN00001035905	EGAX00001219132	EGAR00001232697
236	PD3191a	tumour	EGAS00001000968	EGAN00001035906	EGAX00001219134	EGAR00001232699
237	PD3192a	tumour	EGAS00001000968	EGAN00001035907	EGAX00001219136	EGAR00001232701
238	PD3193a	tumour	EGAS00001000968	EGAN00001000575	EGAX00001219138	EGAR00001232703
239	PD3194a	tumour	EGAS00001000968	EGAN00001035909	EGAX00001219140	EGAR00001232705
240	PD3195a	tumour	EGAS00001000968	EGAN00001035910	EGAX00001219142	EGAR00001232707
241	PD3196a	tumour	EGAS00001000968	EGAN00001035911	EGAX00001219144	EGAR00001232709
242	PD3197a	tumour	EGAS00001000968	EGAN00001035898	EGAX00001219146	EGAR00001232711
243	PD3198a	tumour	EGAS00001000968	EGAN00001035913	EGAX00001219148	EGAR00001232713
244	PD3199a	tumour	EGAS00001000968	EGAN00001035914	EGAX00001219150	EGAR00001232715
245	PD3200a	tumour	EGAS00001000968	EGAN00001035915	EGAX00001219152	EGAR00001232717
246	PD3208a	tumour	EGAS00001000968	EGAN00001035916	EGAX00001219154	EGAR00001232719
247	PD3216a	tumour	EGAS00001000968	EGAN00001035917	EGAX00001219156	EGAR00001232721
248	PD3226a	tumour	EGAS00001000968	EGAN00001035918	EGAX00001219158	EGAR00001232723
249	PD3295a	tumour	EGAS00001000968	EGAN00001000653	EGAX00001219160	EGAR00001232725
250	PD3412a	tumour	EGAS00001000968	EGAN00001088454	EGAX00001219162	EGAR00001232727
252	PD3714a	tumour	EGAS00001000968	EGAN00001000483	EGAX00001219164	EGAR00001232729
253	PD3786a	tumour	EGAS00001000968	EGAN00001000504	EGAX00001219166	EGAR00001232731
254	PD3789a	tumour	EGAS00001000968	EGAN00001029549	EGAX00001219168	EGAR00001232733
255	PD3790a	tumour	EGAS00001000968	EGAN00001000531	EGAX00001219170	EGAR00001232735
256	PD3791a	tumour	EGAS00001000968	EGAN00001000532	EGAX00001219172	EGAR00001232737
258	PD3793a	tumour	EGAS00001000968	EGAN00001000849	EGAX00001219174	EGAR00001232739
260	PD3796a	tumour	EGAS00001000968	EGAN00001029551	EGAX00001219176	EGAR00001232741
261	PD3797a	tumour	EGAS00001000968	EGAN00001000536	EGAX00001219178	EGAR00001232743
262	PD3799a	tumour	EGAS00001000968	EGAN00001000506	EGAX00001219180	EGAR00001232745
264	PD3804a	tumour	EGAS00001000968	EGAN00001000492	EGAX00001219182	EGAR00001232747
265	PD3806a	tumour	EGAS00001000968	EGAN00001094483	EGAX00001219184	EGAR00001232749
266	PD3807a	tumour	EGAS00001000968	EGAN00001000513	EGAX00001219186	EGAR00001232751
267	PD3808a	tumour	EGAS00001000968	EGAN00001000514	EGAX00001219188	EGAR00001232753
268	PD3812a	tumour	EGAS00001000968	EGAN00001000519	EGAX00001219190	EGAR00001232755
269	PD3814a	tumour	EGAS00001000968	EGAN00001000521	EGAX00001219192	EGAR00001232757
270	PD3815a	tumour	EGAS00001000968	EGAN00001000522	EGAX00001219194	EGAR00001232759
272	PD3819a	tumour	EGAS00001000968	EGAN00001000527	EGAX00001219196	EGAR00001232761
273	PD3820a	tumour	EGAS00001000968	EGAN00001000528	EGAX00001219198	EGAR00001232763
274	PD3821a	tumour	EGAS00001000968	EGAN00001000529	EGAX00001219200	EGAR00001232765
275	PD3849a	tumour	EGAS00001000968	EGAN00001000663	EGAX00001219202	EGAR00001232767
276	PD3851a	tumour	EGAS00001000968	EGAN00001000387	EGAX00001219204	EGAR00001232769
277	PD3852a	tumour	EGAS00001000968	EGAN00001000664	EGAX00001219206	EGAR00001232771
278	PD3853a	tumour	EGAS00001000968	EGAN00001000669	EGAX00001219208	EGAR00001232773
279	PD3854a	tumour	EGAS00001000968	EGAN00001000670	EGAX00001219210	EGAR00001232775
280	PD3856a	tumour	EGAS00001000968	EGAN00001000671	EGAX00001219212	EGAR00001232777
281	PD3857a	tumour	EGAS00001000968	EGAN00001000672	EGAX00001219214	EGAR00001232779
282	PD3858a	tumour	EGAS00001000968	EGAN00001000673	EGAX00001219216	EGAR00001232781
283	PD3861a	tumour	EGAS00001000968	EGAN00001029552	EGAX00001219218	EGAR00001232783
284	PD3862a	tumour	EGAS00001000968	EGAN00001029553	EGAX00001219220	EGAR00001232785
285	PD3890a	tumour	EGAS00001000968	EGAN00001226163	EGAX00001219222	EGAR00001232787
286	PD3904a	tumour	EGAS00001000968	EGAN00001000386	EGAX00001219224	EGAR00001232789
287	PD3905a	tumour	EGAS00001000968	EGAN00001000381	EGAX00001219226	EGAR00001232791
288	PD3916a	tumour	EGAS00001000968	EGAN00001001565	EGAX00001219228	EGAR00001232793
289	PD3917a	tumour	EGAS00001000968	EGAN00001001567	EGAX00001219230	EGAR00001232795
290	PD3918a	tumour	EGAS00001000968	EGAN00001001569	EGAX00001219232	EGAR00001232797
291	PD3945a	tumour	EGAS00001000968	EGAN00001030778	EGAX00001219234	EGAR00001232799
292	PD3952a	tumour	EGAS00001000968	EGAN00001005776	EGAX00001219236	EGAR00001232801
293	PD3953a	tumour	EGAS00001000968	EGAN00001005777	EGAX00001219238	EGAR00001232803
294	PD3954a	tumour	EGAS00001000968	EGAN00001005778	EGAX00001219240	EGAR00001232805
295	PD3955a	tumour	EGAS00001000968	EGAN00001000754	EGAX00001219242	EGAR00001232807
296	PD3956a	tumour	EGAS00001000968	EGAN00001000755	EGAX00001219244	EGAR00001232809
297	PD3957a	tumour	EGAS00001000968	EGAN00001005781	EGAX00001219246	EGAR00001232811
298	PD3958a	tumour	EGAS00001000968	EGAN00001005782	EGAX00001219248	EGAR00001232813
299	PD3959a	tumour	EGAS00001000968	EGAN00001000756	EGAX00001219250	EGAR00001232815
300	PD3960a	tumour	EGAS00001000968	EGAN00001006252	EGAX00001219252	EGAR00001232817
301	PD3961a	tumour	EGAS00001000968	EGAN00001006253	EGAX00001219254	EGAR00001232819
302	PD3962a	tumour	EGAS00001000968	EGAN00001000757	EGAX00001219256	EGAR00001232821
303	PD3963a	tumour	EGAS00001000968	EGAN00001000758	EGAX00001219258	EGAR00001232823
304	PD3964a	tumour	EGAS00001000968	EGAN00001000759	EGAX00001219260	EGAR00001232825
305	PD3965a	tumour	EGAS00001000968	EGAN00001000760	EGAX00001219262	EGAR00001232827
306	PD3966a	tumour	EGAS00001000968	EGAN00001006254	EGAX00001219264	EGAR00001232829
307	PD3967a	tumour	EGAS00001000968	EGAN00001001003	EGAX00001219266	EGAR00001232831
308	PD3968a	tumour	EGAS00001000968	EGAN00001000761	EGAX00001219268	EGAR00001232833
309	PD3969a	tumour	EGAS00001000968	EGAN00001006255	EGAX00001219270	EGAR00001232835
310	PD3970a	tumour	EGAS00001000968	EGAN00001001006	EGAX00001219272	EGAR00001232837
311	PD3971a	tumour	EGAS00001000968	EGAN00001226167	EGAX00001219274	EGAR00001232839
312	PD3972a	tumour	EGAS00001000968	EGAN00001001008	EGAX00001219276	EGAR00001232841
313	PD3973a	tumour	EGAS00001000968	EGAN00001006257	EGAX00001219278	EGAR00001232843
314	PD3974a	tumour	EGAS00001000968	EGAN00001001010	EGAX00001219280	EGAR00001232845
315	PD3975a	tumour	EGAS00001000968	EGAN00001001011	EGAX00001219282	EGAR00001232847
316	PD3976a	tumour	EGAS00001000968	EGAN00001006258	EGAX00001219284	EGAR00001232849
317	PD3977a	tumour	EGAS00001000968	EGAN00001000762	EGAX00001219286	EGAR00001232851
318	PD3978a	tumour	EGAS00001000968	EGAN00001000763	EGAX00001219288	EGAR00001232853
319	PD3983a	tumour	EGAS00001000968	EGAN00001000677	EGAX00001219290	EGAR00001232855
321	PD3985a	tumour	EGAS00001000968	EGAN00001000685	EGAX00001219292	EGAR00001232857
322	PD3986a	tumour	EGAS00001000968	EGAN00001000686	EGAX00001219294	EGAR00001232859
323	PD3987a	tumour	EGAS00001000968	EGAN00001000687	EGAX00001219296	EGAR00001232861
324	PD3988a	tumour	EGAS00001000968	EGAN00001000688	EGAX00001219298	EGAR00001232863
325	PD3989a	tumour	EGAS00001000968	EGAN00001066969	EGAX00001219300	EGAR00001232865
326	PD3990a	tumour	EGAS00001000968	EGAN00001000690	EGAX00001219302	EGAR00001232867
327	PD3991a	tumour	EGAS00001000968	EGAN00001000708	EGAX00001219304	EGAR00001232869
328	PD3992a	tumour	EGAS00001000968	EGAN00001000693	EGAX00001219306	EGAR00001232871
329	PD3993a	tumour	EGAS00001000968	EGAN00001000700	EGAX00001219308	EGAR00001232873
330	PD3994a	tumour	EGAS00001000968	EGAN00001000701	EGAX00001219310	EGAR00001232875
331	PD3995a	tumour	EGAS00001000968	EGAN00001000702	EGAX00001219312	EGAR00001232877
332	PD3996a	tumour	EGAS00001000968	EGAN00001000703	EGAX00001219314	EGAR00001232879
333	PD3997a	tumour	EGAS00001000968	EGAN00001000704	EGAX00001219316	EGAR00001232881
334	PD3998a	tumour	EGAS00001000968	EGAN00001000705	EGAX00001219318	EGAR00001232883
335	PD3999a	tumour	EGAS00001000968	EGAN00001000720	EGAX00001219320	EGAR00001232885
336	PD4000a	tumour	EGAS00001000968	EGAN00001000709	EGAX00001219322	EGAR00001232887
337	PD4001a	tumour	EGAS00001000968	EGAN00001000710	EGAX00001219324	EGAR00001232889
339	PD4003a	tumour	EGAS00001000968	EGAN00001000712	EGAX00001219326	EGAR00001232891
340	PD4004a	tumour	EGAS00001000968	EGAN00001000713	EGAX00001219328	EGAR00001232893
341	PD4005a	tumour	EGAS00001000968	EGAN00001226168	EGAX00001219330	EGAR00001232895
342	PD4006a	tumour	EGAS00001000968	EGAN00001000369	EGAX00001219332	EGAR00001232897
343	PD4007a	tumour	EGAS00001000968	EGAN00001000744	EGAX00001219334	EGAR00001232899
344	PD4008a	tumour	EGAS00001000968	EGAN00001003054	EGAX00001219336	EGAR00001232901
345	PD4009a	tumour	EGAS00001000968	EGAN00001003055	EGAX00001219338	EGAR00001232903
346	PD4010a	tumour	EGAS00001000968	EGAN00001003056	EGAX00001219340	EGAR00001232905
347	PD4011a	tumour	EGAS00001000968	EGAN00001003057	EGAX00001219342	EGAR00001232907
348	PD4012a	tumour	EGAS00001000968	EGAN00001005768	EGAX00001219344	EGAR00001232909
349	PD4013a	tumour	EGAS00001000968	EGAN00001003058	EGAX00001219346	EGAR00001232911
350	PD4014a	tumour	EGAS00001000968	EGAN00001003065	EGAX00001219348	EGAR00001232913
351	PD4015a	tumour	EGAS00001000968	EGAN00001003059	EGAX00001219350	EGAR00001232915
352	PD4016a	tumour	EGAS00001000968	EGAN00001226170	EGAX00001219352	EGAR00001232917
353	PD4017a	tumour	EGAS00001000968	EGAN00001003060	EGAX00001219354	EGAR00001232919
354	PD4018a	tumour	EGAS00001000968	EGAN00001003061	EGAX00001219356	EGAR00001232921
355	PD4019a	tumour	EGAS00001000968	EGAN00001003062	EGAX00001219358	EGAR00001232923
356	PD4020a	tumour	EGAS00001000968	EGAN00001003063	EGAX00001219360	EGAR00001232925
357	PD4021a	tumour	EGAS00001000968	EGAN00001003064	EGAX00001219362	EGAR00001232927
358	PD4022a	tumour	EGAS00001000968	EGAN00001003066	EGAX00001219364	EGAR00001232929
359	PD4023a	tumour	EGAS00001000968	EGAN00001003067	EGAX00001219366	EGAR00001232931
360	PD4024a	tumour	EGAS00001000968	EGAN00001003068	EGAX00001219368	EGAR00001232933
361	PD4025a	tumour	EGAS00001000968	EGAN00001005770	EGAX00001219370	EGAR00001232935
362	PD4026a	tumour	EGAS00001000968	EGAN00001003069	EGAX00001219372	EGAR00001232937
363	PD4027a	tumour	EGAS00001000968	EGAN00001003070	EGAX00001219374	EGAR00001232939
364	PD4028a	tumour	EGAS00001000968	EGAN00001005771	EGAX00001219376	EGAR00001232941
366	PD4030a	tumour	EGAS00001000968	EGAN00001005772	EGAX00001219378	EGAR00001232943
367	PD4031a	tumour	EGAS00001000968	EGAN00001005773	EGAX00001219380	EGAR00001232945
369	PD4033a	tumour	EGAS00001000968	EGAN00001005774	EGAX00001219382	EGAR00001232947
370	PD4034a	tumour	EGAS00001000968	EGAN00001226171	EGAX00001219384	EGAR00001232949
371	PD4035a	tumour	EGAS00001000968	EGAN00001011459	EGAX00001219386	EGAR00001232951
372	PD4036a	tumour	EGAS00001000968	EGAN00001011460	EGAX00001219388	EGAR00001232953
373	PD4037a	tumour	EGAS00001000968	EGAN00001011461	EGAX00001219390	EGAR00001232955
374	PD4038a	tumour	EGAS00001000968	EGAN00001011462	EGAX00001219392	EGAR00001232957
375	PD4039a	tumour	EGAS00001000968	EGAN00001011463	EGAX00001219394	EGAR00001232959
377	PD4060a	tumour	EGAS00001000968	EGAN00001000797	EGAX00001219396	EGAR00001232961
378	PD4063a	tumour	EGAS00001000968	EGAN00001000799	EGAX00001219398	EGAR00001232963
379	PD4069a	tumour	EGAS00001000968	EGAN00001032194	EGAX00001219400	EGAR00001232965
380	PD4070a	tumour	EGAS00001000968	EGAN00001036443	EGAX00001219402	EGAR00001232967
381	PD4072a	tumour	EGAS00001000968	EGAN00001032168	EGAX00001219404	EGAR00001232969
383	PD4076a	tumour	EGAS00001000968	EGAN00001092747	EGAX00001219406	EGAR00001232971
384	PD4080a	tumour	EGAS00001000968	EGAN00001032170	EGAX00001219408	EGAR00001232973
385	PD4082a	tumour	EGAS00001000968	EGAN00001036449	EGAX00001219410	EGAR00001232975
386	PD4084a	tumour	EGAS00001000968	EGAN00001000856	EGAX00001219412	EGAR00001232977
387	PD4085a	tumour	EGAS00001000968	EGAN00001000588	EGAX00001219414	EGAR00001232979
388	PD4086a	tumour	EGAS00001000968	EGAN00001000745	EGAX00001219416	EGAR00001232981
389	PD4087a	tumour	EGAS00001000968	EGAN00001000858	EGAX00001219418	EGAR00001232983
390	PD4088a	tumour	EGAS00001000968	EGAN00001000590	EGAX00001219420	EGAR00001232985
400	PD4103a	tumour	EGAS00001000968	EGAN00001000594	EGAX00001219422	EGAR00001232987
401	PD4104a	tumour	EGAS00001000968	EGAN00001000896	EGAX00001219424	EGAR00001232989
402	PD4105a	tumour	EGAS00001000968	EGAN00001000898	EGAX00001219426	EGAR00001232991
403	PD4106a	tumour	EGAS00001000968	EGAN00001000900	EGAX00001219428	EGAR00001232993
404	PD4107a	tumour	EGAS00001000968	EGAN00001001177	EGAX00001219430	EGAR00001232995
405	PD4108a	tumour	EGAS00001000968	EGAN00001000902	EGAX00001219432	EGAR00001232997
406	PD4109a	tumour	EGAS00001000968	EGAN00001000749	EGAX00001219434	EGAR00001232999
407	PD4110a	tumour	EGAS00001000968	EGAN00001000904	EGAX00001219436	EGAR00001233001
408	PD4111a	tumour	EGAS00001000968	EGAN00001000906	EGAX00001219438	EGAR00001233003
409	PD4112a	tumour	EGAS00001000968	EGAN00001000908	EGAX00001219440	EGAR00001233005
410	PD4113a	tumour	EGAS00001000968	EGAN00001000768	EGAX00001219442	EGAR00001233007
411	PD4115a	tumour	EGAS00001000968	EGAN00001000592	EGAX00001219444	EGAR00001233009
412	PD4116a	tumour	EGAS00001000968	EGAN00001000596	EGAX00001219446	EGAR00001233011
413	PD4118a	tumour	EGAS00001000968	EGAN00001000912	EGAX00001219448	EGAR00001233013
414	PD4119a	tumour	EGAS00001000968	EGAN00001000913	EGAX00001219450	EGAR00001233015
415	PD4120a	tumour	EGAS00001000968	EGAN00001032318	EGAX00001219452	EGAR00001233017
416	PD4121a	tumour	EGAS00001000968	EGAN00001000915	EGAX00001219454	EGAR00001233019
417	PD4122a	tumour	EGAS00001000968	EGAN00001000916	EGAX00001219456	EGAR00001233021
418	PD4123a	tumour	EGAS00001000968	EGAN00001000917	EGAX00001219458	EGAR00001233023
419	PD4124a	tumour	EGAS00001000968	EGAN00001000918	EGAX00001219460	EGAR00001233025
420	PD4125a	tumour	EGAS00001000968	EGAN00001000919	EGAX00001219462	EGAR00001233027
421	PD4126a	tumour	EGAS00001000968	EGAN00001000920	EGAX00001219464	EGAR00001233029
422	PD4127a	tumour	EGAS00001000968	EGAN00001000921	EGAX00001219466	EGAR00001233031
423	PD4128a	tumour	EGAS00001000968	EGAN00001000922	EGAX00001219468	EGAR00001233033
424	PD4129a	tumour	EGAS00001000968	EGAN00001000923	EGAX00001219470	EGAR00001233035
425	PD4130a	tumour	EGAS00001000968	EGAN00001000924	EGAX00001219472	EGAR00001233037
426	PD4131a	tumour	EGAS00001000968	EGAN00001000925	EGAX00001219474	EGAR00001233039
427	PD4132a	tumour	EGAS00001000968	EGAN00001000926	EGAX00001219476	EGAR00001233041
428	PD4133a	tumour	EGAS00001000968	EGAN00001000927	EGAX00001219478	EGAR00001233043
429	PD4134a	tumour	EGAS00001000968	EGAN00001000928	EGAX00001219480	EGAR00001233045
430	PD4135a	tumour	EGAS00001000968	EGAN00001000929	EGAX00001219482	EGAR00001233047
431	PD4136a	tumour	EGAS00001000968	EGAN00001000930	EGAX00001219484	EGAR00001233049
432	PD4137a	tumour	EGAS00001000968	EGAN00001000931	EGAX00001219486	EGAR00001233051
433	PD4183a	tumour	EGAS00001000968	EGAN00001001055	EGAX00001219488	EGAR00001233053
435	PD4187a	tumour	EGAS00001000968	EGAN00001001059	EGAX00001219490	EGAR00001233055
436	PD4188a	tumour	EGAS00001000968	EGAN00001001061	EGAX00001219492	EGAR00001233057
437	PD4190a	tumour	EGAS00001000968	EGAN00001226172	EGAX00001219494	EGAR00001233059
439	PD4194a	tumour	EGAS00001000968	EGAN00001030897	EGAX00001219496	EGAR00001233061
440	PD4195a	tumour	EGAS00001000968	EGAN00001036442	EGAX00001219498	EGAR00001233063
441	PD4196a	tumour	EGAS00001000968	EGAN00001036444	EGAX00001219500	EGAR00001233065
442	PD4197a	tumour	EGAS00001000968	EGAN00001036446	EGAX00001219502	EGAR00001233067
443	PD4198a	tumour	EGAS00001000968	EGAN00001030899	EGAX00001219504	EGAR00001233069
444	PD4199a	tumour	EGAS00001000968	EGAN00001030900	EGAX00001219506	EGAR00001233071
445	PD4200a	tumour	EGAS00001000968	EGAN00001036448	EGAX00001219508	EGAR00001233073
446	PD4201a	tumour	EGAS00001000968	EGAN00001036494	EGAX00001219510	EGAR00001233075
447	PD4202a	tumour	EGAS00001000968	EGAN00001036495	EGAX00001219512	EGAR00001233077
448	PD4203a	tumour	EGAS00001000968	EGAN00001036496	EGAX00001219514	EGAR00001233079
449	PD4204a	tumour	EGAS00001000968	EGAN00001036497	EGAX00001219516	EGAR00001233081
450	PD4205a	tumour	EGAS00001000968	EGAN00001036498	EGAX00001219518	EGAR00001233083
451	PD4224a	tumour	EGAS00001000968	EGAN00001032172	EGAX00001219520	EGAR00001233085
452	PD4225a	tumour	EGAS00001000968	EGAN00001032174	EGAX00001219522	EGAR00001233087
453	PD4226a	tumour	EGAS00001000968	EGAN00001036476	EGAX00001219524	EGAR00001233089
455	PD4248a	tumour	EGAS00001000968	EGAN00001030905	EGAX00001219526	EGAR00001233091
456	PD4252a	tumour	EGAS00001000968	EGAN00001012427	EGAX00001219528	EGAR00001233093
457	PD4255a	tumour	EGAS00001000968	EGAN00001030784	EGAX00001219530	EGAR00001233095
458	PD4261a	tumour	EGAS00001000968	EGAN00001032176	EGAX00001219532	EGAR00001233097
459	PD4264a	tumour	EGAS00001000968	EGAN00001036482	EGAX00001219534	EGAR00001233099
460	PD4266a	tumour	EGAS00001000968	EGAN00001032180	EGAX00001219536	EGAR00001233101
461	PD4267a	tumour	EGAS00001000968	EGAN00001032178	EGAX00001219538	EGAR00001233103
462	PD4269a	tumour	EGAS00001000968	EGAN00001001210	EGAX00001219540	EGAR00001233105
463	PD4270a	tumour	EGAS00001000968	EGAN00001001212	EGAX00001219542	EGAR00001233107
464	PD4271a	tumour	EGAS00001000968	EGAN00001001214	EGAX00001219544	EGAR00001233109
465	PD4272a	tumour	EGAS00001000968	EGAN00001001216	EGAX00001219546	EGAR00001233111
467	PD4274a	tumour	EGAS00001000968	EGAN00001001220	EGAX00001219548	EGAR00001233113
468	PD4275a	tumour	EGAS00001000968	EGAN00001001222	EGAX00001219550	EGAR00001233115
469	PD4276a	tumour	EGAS00001000968	EGAN00001001224	EGAX00001219552	EGAR00001233117
470	PD4277a	tumour	EGAS00001000968	EGAN00001001226	EGAX00001219554	EGAR00001233119
471	PD4278a	tumour	EGAS00001000968	EGAN00001001228	EGAX00001219556	EGAR00001233121
472	PD4279a	tumour	EGAS00001000968	EGAN00001001230	EGAX00001219558	EGAR00001233123
473	PD4280a	tumour	EGAS00001000968	EGAN00001001232	EGAX00001219560	EGAR00001233125
474	PD4281a	tumour	EGAS00001000968	EGAN00001001234	EGAX00001219562	EGAR00001233127
475	PD4283a	tumour	EGAS00001000968	EGAN00001001143	EGAX00001219564	EGAR00001233129
476	PD4284c	tumour	EGAS00001000968	EGAN00001010397	EGAX00001219567	EGAR00001233132
477	PD4285a	tumour	EGAS00001000968	EGAN00001001147	EGAX00001219568	EGAR00001233133
478	PD4286a	tumour	EGAS00001000968	EGAN00001001149	EGAX00001219570	EGAR00001233135
479	PD4288a	tumour	EGAS00001000968	EGAN00001001151	EGAX00001219572	EGAR00001233137
480	PD4289a	tumour	EGAS00001000968	EGAN00001001153	EGAX00001219574	EGAR00001233139
481	PD4290a	tumour	EGAS00001000968	EGAN00001001155	EGAX00001219576	EGAR00001233141
482	PD4291a	tumour	EGAS00001000968	EGAN00001001157	EGAX00001219578	EGAR00001233143
483	PD4292d	tumour	EGAS00001000968	EGAN00001010205	EGAX00001219581	EGAR00001233146
484	PD4293a	tumour	EGAS00001000968	EGAN00001001161	EGAX00001219582	EGAR00001233147
485	PD4294a	tumour	EGAS00001000968	EGAN00001001163	EGAX00001219584	EGAR00001233149
486	PD4295a	tumour	EGAS00001000968	EGAN00001001165	EGAX00001219586	EGAR00001233151
487	PD4296a	tumour	EGAS00001000968	EGAN00001001167	EGAX00001219588	EGAR00001233153
488	PD4299a	tumour	EGAS00001000968	EGAN00001001171	EGAX00001219590	EGAR00001233155
489	PD4300a	tumour	EGAS00001000968	EGAN00001001173	EGAX00001219592	EGAR00001233157
490	PD4301a	tumour	EGAS00001000968	EGAN00001001175	EGAX00001219594	EGAR00001233159
491	PD4302a	tumour	EGAS00001000968	EGAN00001010409	EGAX00001219596	EGAR00001233161
492	PD4303a	tumour	EGAS00001000968	EGAN00001010213	EGAX00001219598	EGAR00001233163
493	PD4315a	tumour	EGAS00001000968	EGAN00001032196	EGAX00001219600	EGAR00001233165
495	PD4594a	tumour	EGAS00001000968	EGAN00001036480	EGAX00001219602	EGAR00001233167
496	PD4595a	tumour	EGAS00001000968	EGAN00001036527	EGAX00001219604	EGAR00001233169
497	PD4596a	tumour	EGAS00001000968	EGAN00001036529	EGAX00001219606	EGAR00001233171
498	PD4599a	tumour	EGAS00001000968	EGAN00001036531	EGAX00001219608	EGAR00001233173
499	PD4600a	tumour	EGAS00001000968	EGAN00001036533	EGAX00001219610	EGAR00001233175
500	PD4601a	tumour	EGAS00001000968	EGAN00001036535	EGAX00001219612	EGAR00001233177
501	PD4602a	tumour	EGAS00001000968	EGAN00001036537	EGAX00001219614	EGAR00001233179
502	PD4603a	tumour	EGAS00001000968	EGAN00001036539	EGAX00001219616	EGAR00001233181
503	PD4604a	tumour	EGAS00001000968	EGAN00001032198	EGAX00001219618	EGAR00001233183
504	PD4605a	tumour	EGAS00001000968	EGAN00001032200	EGAX00001219620	EGAR00001233185
505	PD4606a	tumour	EGAS00001000968	EGAN00001032202	EGAX00001219622	EGAR00001233187
506	PD4607a	tumour	EGAS00001000968	EGAN00001032204	EGAX00001219624	EGAR00001233189
507	PD4608a	tumour	EGAS00001000968	EGAN00001032206	EGAX00001219626	EGAR00001233191
508	PD4613a	tumour	EGAS00001000968	EGAN00001032208	EGAX00001219628	EGAR00001233193
509	PD4727a	tumour	EGAS00001000968	EGAN00001226176	EGAX00001219630	EGAR00001233195
510	PD4728a	tumour	EGAS00001000968	EGAN00001226178	EGAX00001219632	EGAR00001233197
511	PD4771a	tumour	EGAS00001000968	EGAN00001001352	EGAX00001219634	EGAR00001233199
512	PD4772a	tumour	EGAS00001000968	EGAN00001001428	EGAX00001219636	EGAR00001233201
513	PD4773a	tumour	EGAS00001000968	EGAN00001001405	EGAX00001219638	EGAR00001233203
514	PD4775a	tumour	EGAS00001000968	EGAN00001001407	EGAX00001219640	EGAR00001233205
515	PD4776a	tumour	EGAS00001000968	EGAN00001001430	EGAX00001219642	EGAR00001233207
517	PD4778a	tumour	EGAS00001000968	EGAN00001001409	EGAX00001219644	EGAR00001233209
518	PD4779a	tumour	EGAS00001000968	EGAN00001001438	EGAX00001219646	EGAR00001233211
519	PD4780a	tumour	EGAS00001000968	EGAN00001001435	EGAX00001219648	EGAR00001233213
520	PD4781a	tumour	EGAS00001000968	EGAN00001001434	EGAX00001219650	EGAR00001233215
521	PD4802a	tumour	EGAS00001000968	EGAN00001001422	EGAX00001219652	EGAR00001233217
522	PD4808a	tumour	EGAS00001000968	EGAN00001001424	EGAX00001219654	EGAR00001233219
523	PD4809a	tumour	EGAS00001000968	EGAN00001001426	EGAX00001219656	EGAR00001233221
524	PD4820a	tumour	EGAS00001000968	EGAN00001226180	EGAX00001219658	EGAR00001233223
525	PD4826a	tumour	EGAS00001000968	EGAN00001030788	EGAX00001219660	EGAR00001233225
526	PD4833a	tumour	EGAS00001000968	EGAN00001030790	EGAX00001219662	EGAR00001233227
527	PD4836a	tumour	EGAS00001000968	EGAN00001030792	EGAX00001219664	EGAR00001233229
528	PD4841a	tumour	EGAS00001000968	EGAN00001030794	EGAX00001219666	EGAR00001233231
529	PD4842a	tumour	EGAS00001000968	EGAN00001036505	EGAX00001219668	EGAR00001233233
530	PD4843a	tumour	EGAS00001000968	EGAN00001036506	EGAX00001219670	EGAR00001233235
531	PD4844a	tumour	EGAS00001000968	EGAN00001226182	EGAX00001219672	EGAR00001233237
532	PD4845a	tumour	EGAS00001000968	EGAN00001030828	EGAX00001219674	EGAR00001233239
533	PD4846a	tumour	EGAS00001000968	EGAN00001036508	EGAX00001219676	EGAR00001233241
534	PD4847a	tumour	EGAS00001000968	EGAN00001030830	EGAX00001219678	EGAR00001233243
535	PD4848b	tumour	EGAS00001000968	EGAN00001001552	EGAX00001219681	EGAR00001233246
536	PD4849b	tumour	EGAS00001000968	EGAN00001001557	EGAX00001219683	EGAR00001233248
538	PD4851b	tumour	EGAS00001000968	EGAN00001001546	EGAX00001219685	EGAR00001233250
540	PD4853b	tumour	EGAS00001000968	EGAN00001001551	EGAX00001219687	EGAR00001233252
541	PD4854b	tumour	EGAS00001000968	EGAN00001001554	EGAX00001219689	EGAR00001233254
542	PD4855b	tumour	EGAS00001000968	EGAN00001001553	EGAX00001219691	EGAR00001233256
544	PD4857b	tumour	EGAS00001000968	EGAN00001001563	EGAX00001219693	EGAR00001233258
546	PD4859b	tumour	EGAS00001000968	EGAN00001001550	EGAX00001219695	EGAR00001233260
547	PD4860b	tumour	EGAS00001000968	EGAN00001001542	EGAX00001219697	EGAR00001233262
548	PD4861b	tumour	EGAS00001000968	EGAN00001001541	EGAX00001219699	EGAR00001233264
549	PD4862b	tumour	EGAS00001000968	EGAN00001001544	EGAX00001219701	EGAR00001233266
550	PD4863b	tumour	EGAS00001000968	EGAN00001001543	EGAX00001219703	EGAR00001233268
551	PD4864b	tumour	EGAS00001000968	EGAN00001001548	EGAX00001219705	EGAR00001233270
553	PD4866b	tumour	EGAS00001000968	EGAN00001001549	EGAX00001219707	EGAR00001233272
554	PD4867b	tumour	EGAS00001000968	EGAN00001001547	EGAX00001219709	EGAR00001233274
558	PD4871b	tumour	EGAS00001000968	EGAN00001001545	EGAX00001219711	EGAR00001233276
559	PD4872a	tumour	EGAS00001000968	EGAN00001032182	EGAX00001219712	EGAR00001233277
560	PD4873a	tumour	EGAS00001000968	EGAN00001032184	EGAX00001219714	EGAR00001233279
561	PD4874a	tumour	EGAS00001000968	EGAN00001030780	EGAX00001219716	EGAR00001233281
562	PD4875a	tumour	EGAS00001000968	EGAN00001030782	EGAX00001219718	EGAR00001233283
563	PD4876a	tumour	EGAS00001000968	EGAN00001032186	EGAX00001219720	EGAR00001233285
565	PD4884a	tumour	EGAS00001000968	EGAN00001226183	EGAX00001219722	EGAR00001233287
566	PD4885a	tumour	EGAS00001000968	EGAN00001226185	EGAX00001219724	EGAR00001233289
567	PD4886a	tumour	EGAS00001000968	EGAN00001226187	EGAX00001219726	EGAR00001233291
568	PD4887a	tumour	EGAS00001000968	EGAN00001226189	EGAX00001219728	EGAR00001233293
569	PD4888a	tumour	EGAS00001000968	EGAN00001226191	EGAX00001219730	EGAR00001233295
570	PD4889a	tumour	EGAS00001000968	EGAN00001226193	EGAX00001219732	EGAR00001233297
571	PD4890a	tumour	EGAS00001000968	EGAN00001226195	EGAX00001219734	EGAR00001233299
572	PD4891a	tumour	EGAS00001000968	EGAN00001226197	EGAX00001219736	EGAR00001233301
573	PD4892a	tumour	EGAS00001000968	EGAN00001226199	EGAX00001219738	EGAR00001233303
574	PD4893a	tumour	EGAS00001000968	EGAN00001226201	EGAX00001219740	EGAR00001233305
575	PD4894a	tumour	EGAS00001000968	EGAN00001226203	EGAX00001219742	EGAR00001233307
576	PD4895a	tumour	EGAS00001000968	EGAN00001226205	EGAX00001219744	EGAR00001233309
577	PD4896a	tumour	EGAS00001000968	EGAN00001226207	EGAX00001219746	EGAR00001233311
578	PD4897a	tumour	EGAS00001000968	EGAN00001226209	EGAX00001219748	EGAR00001233313
579	PD4898a	tumour	EGAS00001000968	EGAN00001226211	EGAX00001219750	EGAR00001233315
580	PD4900a	tumour	EGAS00001000968	EGAN00001226213	EGAX00001219752	EGAR00001233317
581	PD4901a	tumour	EGAS00001000968	EGAN00001226215	EGAX00001219754	EGAR00001233319
582	PD4902a	tumour	EGAS00001000968	EGAN00001226217	EGAX00001219756	EGAR00001233321
583	PD4903a	tumour	EGAS00001000968	EGAN00001226219	EGAX00001219758	EGAR00001233323
584	PD4904a	tumour	EGAS00001000968	EGAN00001226221	EGAX00001219760	EGAR00001233325
585	PD4905a	tumour	EGAS00001000968	EGAN00001226223	EGAX00001219762	EGAR00001233327
586	PD4906a	tumour	EGAS00001000968	EGAN00001226225	EGAX00001219764	EGAR00001233329
587	PD4907a	tumour	EGAS00001000968	EGAN00001226227	EGAX00001219766	EGAR00001233331
588	PD4908a	tumour	EGAS00001000968	EGAN00001226229	EGAX00001219768	EGAR00001233333
589	PD4909a	tumour	EGAS00001000968	EGAN00001226231	EGAX00001219770	EGAR00001233335
590	PD4910a	tumour	EGAS00001000968	EGAN00001226233	EGAX00001219772	EGAR00001233337
591	PD4911a	tumour	EGAS00001000968	EGAN00001226235	EGAX00001219774	EGAR00001233339
592	PD4912a	tumour	EGAS00001000968	EGAN00001226237	EGAX00001219776	EGAR00001233341
593	PD4913a	tumour	EGAS00001000968	EGAN00001226239	EGAX00001219778	EGAR00001233343
594	PD4914a	tumour	EGAS00001000968	EGAN00001226241	EGAX00001219780	EGAR00001233345
595	PD4915a	tumour	EGAS00001000968	EGAN00001226243	EGAX00001219782	EGAR00001233347
597	PD4917a	tumour	EGAS00001000968	EGAN00001226245	EGAX00001219784	EGAR00001233349
598	PD4918a	tumour	EGAS00001000968	EGAN00001226247	EGAX00001219786	EGAR00001233351
599	PD4919a	tumour	EGAS00001000968	EGAN00001226249	EGAX00001219788	EGAR00001233353
600	PD4920a	tumour	EGAS00001000968	EGAN00001226251	EGAX00001219790	EGAR00001233355
601	PD4921a	tumour	EGAS00001000968	EGAN00001226253	EGAX00001219792	EGAR00001233357
602	PD4922a	tumour	EGAS00001000968	EGAN00001226255	EGAX00001219794	EGAR00001233359
603	PD4923a	tumour	EGAS00001000968	EGAN00001226257	EGAX00001219796	EGAR00001233361
604	PD4924a	tumour	EGAS00001000968	EGAN00001226259	EGAX00001219798	EGAR00001233363
605	PD4925a	tumour	EGAS00001000968	EGAN00001226261	EGAX00001219800	EGAR00001233365
606	PD4926a	tumour	EGAS00001000968	EGAN00001032290	EGAX00001219802	EGAR00001233367
607	PD4927a	tumour	EGAS00001000968	EGAN00001096375	EGAX00001219804	EGAR00001233369
608	PD4928a	tumour	EGAS00001000968	EGAN00001032294	EGAX00001219806	EGAR00001233371
609	PD4929a	tumour	EGAS00001000968	EGAN00001032296	EGAX00001219808	EGAR00001233373
610	PD4930a	tumour	EGAS00001000968	EGAN00001226263	EGAX00001219810	EGAR00001233375
611	PD4931a	tumour	EGAS00001000968	EGAN00001226265	EGAX00001219812	EGAR00001233377
612	PD4932a	tumour	EGAS00001000968	EGAN00001226267	EGAX00001219814	EGAR00001233379
613	PD4933a	tumour	EGAS00001000968	EGAN00001226269	EGAX00001219816	EGAR00001233381
614	PD4934a	tumour	EGAS00001000968	EGAN00001036488	EGAX00001219818	EGAR00001233383
615	PD4935a	tumour	EGAS00001000968	EGAN00001036489	EGAX00001219820	EGAR00001233385
616	PD4936a	tumour	EGAS00001000968	EGAN00001036490	EGAX00001219822	EGAR00001233387
617	PD4937a	tumour	EGAS00001000968	EGAN00001036491	EGAX00001219824	EGAR00001233389
618	PD4938a	tumour	EGAS00001000968	EGAN00001036492	EGAX00001219826	EGAR00001233391
619	PD4939a	tumour	EGAS00001000968	EGAN00001036493	EGAX00001219828	EGAR00001233393
620	PD4940a	tumour	EGAS00001000968	EGAN00001001454	EGAX00001219830	EGAR00001233395
621	PD4941a	tumour	EGAS00001000968	EGAN00001001455	EGAX00001219832	EGAR00001233397
622	PD4942a	tumour	EGAS00001000968	EGAN00001001456	EGAX00001219834	EGAR00001233399
623	PD4943a	tumour	EGAS00001000968	EGAN00001001457	EGAX00001219836	EGAR00001233401
624	PD4944a	tumour	EGAS00001000968	EGAN00001001458	EGAX00001219838	EGAR00001233403
625	PD4947a2	tumour	EGAS00001000968	EGAN00001072469	EGAX00001219840	EGAR00001233405
626	PD4951a	tumour	EGAS00001000968	EGAN00001032304	EGAX00001219842	EGAR00001233407
627	PD4952a	tumour	EGAS00001000968	EGAN00001032306	EGAX00001219844	EGAR00001233409
628	PD4953a	tumour	EGAS00001000968	EGAN00001032308	EGAX00001219846	EGAR00001233411
629	PD4954a	tumour	EGAS00001000968	EGAN00001032310	EGAX00001219848	EGAR00001233413
630	PD4955a	tumour	EGAS00001000968	EGAN00001032312	EGAX00001219850	EGAR00001233415
631	PD4956a	tumour	EGAS00001000968	EGAN00001030786	EGAX00001219852	EGAR00001233417
632	PD4957a	tumour	EGAS00001000968	EGAN00001032314	EGAX00001219854	EGAR00001233419
633	PD4958a	tumour	EGAS00001000968	EGAN00001032316	EGAX00001219856	EGAR00001233421
634	PD4959a	tumour	EGAS00001000968	EGAN00001032339	EGAX00001219858	EGAR00001233423
635	PD4962a	tumour	EGAS00001000968	EGAN00001032341	EGAX00001219860	EGAR00001233425
636	PD4963a	tumour	EGAS00001000968	EGAN00001032343	EGAX00001219862	EGAR00001233427
637	PD4965a	tumour	EGAS00001000968	EGAN00001032345	EGAX00001219864	EGAR00001233429
638	PD4966a	tumour	EGAS00001000968	EGAN00001032347	EGAX00001219866	EGAR00001233431
639	PD4967a	tumour	EGAS00001000968	EGAN00001032349	EGAX00001219868	EGAR00001233433
640	PD4968a	tumour	EGAS00001000968	EGAN00001032351	EGAX00001219870	EGAR00001233435
641	PD4969a	tumour	EGAS00001000968	EGAN00001036484	EGAX00001219872	EGAR00001233437
642	PD4970a	tumour	EGAS00001000968	EGAN00001032353	EGAX00001219874	EGAR00001233439
643	PD4971a	tumour	EGAS00001000968	EGAN00001032321	EGAX00001219876	EGAR00001233441
644	PD4972a	tumour	EGAS00001000968	EGAN00001032323	EGAX00001219878	EGAR00001233443
645	PD4975a	tumour	EGAS00001000968	EGAN00001030796	EGAX00001219880	EGAR00001233445
646	PD4976a	tumour	EGAS00001000968	EGAN00001032327	EGAX00001219882	EGAR00001233447
647	PD4977a	tumour	EGAS00001000968	EGAN00001030798	EGAX00001219884	EGAR00001233449
648	PD4978a	tumour	EGAS00001000968	EGAN00001032355	EGAX00001219886	EGAR00001233451
649	PD4979a	tumour	EGAS00001000968	EGAN00001030800	EGAX00001219888	EGAR00001233453
650	PD4980a	tumour	EGAS00001000968	EGAN00001030802	EGAX00001219890	EGAR00001233455
651	PD4981a	tumour	EGAS00001000968	EGAN00001032329	EGAX00001219892	EGAR00001233457
652	PD4982a	tumour	EGAS00001000968	EGAN00001032331	EGAX00001219894	EGAR00001233459
653	PD4983a	tumour	EGAS00001000968	EGAN00001032333	EGAX00001219896	EGAR00001233461
654	PD4985a	tumour	EGAS00001000968	EGAN00001032335	EGAX00001219898	EGAR00001233463
655	PD4986a	tumour	EGAS00001000968	EGAN00001032337	EGAX00001219900	EGAR00001233465
656	PD4990a2	tumour	EGAS00001000968	EGAN00001042303	EGAX00001219902	EGAR00001233467
657	PD4994a2	tumour	EGAS00001000968	EGAN00001042315	EGAX00001219904	EGAR00001233469
658	PD4996a2	tumour	EGAS00001000968	EGAN00001042313	EGAX00001219906	EGAR00001233471
659	PD5003a2	tumour	EGAS00001000968	EGAN00001077887	EGAX00001219908	EGAR00001233473
660	PD5004a2	tumour	EGAS00001000968	EGAN00001042312	EGAX00001219910	EGAR00001233475
661	PD5005a2	tumour	EGAS00001000968	EGAN00001042316	EGAX00001219912	EGAR00001233477
662	PD5008a2	tumour	EGAS00001000968	EGAN00001042296	EGAX00001219914	EGAR00001233479
663	PD5010a2	tumour	EGAS00001000968	EGAN00001030984	EGAX00001219916	EGAR00001233481
664	PD5014a2	tumour	EGAS00001000968	EGAN00001042311	EGAX00001219918	EGAR00001233483
665	PD5027a2	tumour	EGAS00001000968	EGAN00001042300	EGAX00001219920	EGAR00001233485
666	PD5029a2	tumour	EGAS00001000968	EGAN00001042294	EGAX00001219922	EGAR00001233487
667	PD5111a	tumour	EGAS00001000968	EGAN00001001461	EGAX00001219924	EGAR00001233489
668	PD5115a2	tumour	EGAS00001000968	EGAN00001030960	EGAX00001219926	EGAR00001233491
670	PD5120a	tumour	EGAS00001000968	EGAN00001001460	EGAX00001219928	EGAR00001233493
671	PD5122a	tumour	EGAS00001000968	EGAN00001001459	EGAX00001219930	EGAR00001233495
672	PD5125a2	tumour	EGAS00001000968	EGAN00001226271	EGAX00001219932	EGAR00001233497
673	PD5151a2	tumour	EGAS00001000968	EGAN00001030963	EGAX00001219934	EGAR00001233499
674	PD5175a2	tumour	EGAS00001000968	EGAN00001030964	EGAX00001219936	EGAR00001233501
675	PD5847a	tumour	EGAS00001000968	EGAN00001001462	EGAX00001219938	EGAR00001233503
676	PD5848a	tumour	EGAS00001000968	EGAN00001001463	EGAX00001219940	EGAR00001233505
677	PD5849a	tumour	EGAS00001000968	EGAN00001001625	EGAX00001219942	EGAR00001233507
678	PD5850a	tumour	EGAS00001000968	EGAN00001001626	EGAX00001219944	EGAR00001233509
679	PD5851a	tumour	EGAS00001000968	EGAN00001001630	EGAX00001219946	EGAR00001233511
680	PD5852a	tumour	EGAS00001000968	EGAN00001001631	EGAX00001219948	EGAR00001233513
681	PD5853a	tumour	EGAS00001000968	EGAN00001001632	EGAX00001219950	EGAR00001233515
684	PD5856a	tumour	EGAS00001000968	EGAN00001001628	EGAX00001219952	EGAR00001233517
685	PD5857a	tumour	EGAS00001000968	EGAN00001001629	EGAX00001219954	EGAR00001233519
686	PD5858a	tumour	EGAS00001000968	EGAN00001001634	EGAX00001219956	EGAR00001233521
687	PD5859a	tumour	EGAS00001000968	EGAN00001001635	EGAX00001219958	EGAR00001233523
688	PD5860a	tumour	EGAS00001000968	EGAN00001001636	EGAX00001219960	EGAR00001233525
689	PD5861a	tumour	EGAS00001000968	EGAN00001001637	EGAX00001219962	EGAR00001233527
690	PD5862a	tumour	EGAS00001000968	EGAN00001001638	EGAX00001219964	EGAR00001233529
691	PD5863a	tumour	EGAS00001000968	EGAN00001001639	EGAX00001219966	EGAR00001233531
692	PD5864a	tumour	EGAS00001000968	EGAN00001001640	EGAX00001219968	EGAR00001233533
693	PD5865a	tumour	EGAS00001000968	EGAN00001226272	EGAX00001219970	EGAR00001233535
694	PD5866a	tumour	EGAS00001000968	EGAN00001226273	EGAX00001219972	EGAR00001233537
695	PD5867a	tumour	EGAS00001000968	EGAN00001001643	EGAX00001219974	EGAR00001233539
696	PD5868a	tumour	EGAS00001000968	EGAN00001001644	EGAX00001219976	EGAR00001233541
697	PD5869a	tumour	EGAS00001000968	EGAN00001001645	EGAX00001219978	EGAR00001233543
698	PD5870a	tumour	EGAS00001000968	EGAN00001001646	EGAX00001219980	EGAR00001233545
699	PD5871a	tumour	EGAS00001000968	EGAN00001001647	EGAX00001219982	EGAR00001233547
700	PD5872a	tumour	EGAS00001000968	EGAN00001001648	EGAX00001219984	EGAR00001233549
701	PD5873a	tumour	EGAS00001000968	EGAN00001001649	EGAX00001219986	EGAR00001233551
703	PD5875a	tumour	EGAS00001000968	EGAN00001001718	EGAX00001219988	EGAR00001233553
704	PD5876a	tumour	EGAS00001000968	EGAN00001001720	EGAX00001219990	EGAR00001233555
705	PD5877a	tumour	EGAS00001000968	EGAN00001001722	EGAX00001219992	EGAR00001233557
706	PD5878a	tumour	EGAS00001000968	EGAN00001001724	EGAX00001219994	EGAR00001233559
707	PD5879a	tumour	EGAS00001000968	EGAN00001001726	EGAX00001219996	EGAR00001233561
708	PD5880a	tumour	EGAS00001000968	EGAN00001001728	EGAX00001219998	EGAR00001233563
709	PD5881a	tumour	EGAS00001000968	EGAN00001001730	EGAX00001220000	EGAR00001233565
710	PD5882a	tumour	EGAS00001000968	EGAN00001001732	EGAX00001220002	EGAR00001233567
711	PD5883a	tumour	EGAS00001000968	EGAN00001001734	EGAX00001220004	EGAR00001233569
712	PD5884a	tumour	EGAS00001000968	EGAN00001001736	EGAX00001220006	EGAR00001233571
713	PD5885a	tumour	EGAS00001000968	EGAN00001001738	EGAX00001220008	EGAR00001233573
714	PD5886a	tumour	EGAS00001000968	EGAN00001001740	EGAX00001220010	EGAR00001233575
715	PD5887a	tumour	EGAS00001000968	EGAN00001001742	EGAX00001220012	EGAR00001233577
716	PD5888a	tumour	EGAS00001000968	EGAN00001001744	EGAX00001220014	EGAR00001233579
717	PD5889a	tumour	EGAS00001000968	EGAN00001001746	EGAX00001220016	EGAR00001233581
718	PD5890a	tumour	EGAS00001000968	EGAN00001001748	EGAX00001220018	EGAR00001233583
719	PD5891a	tumour	EGAS00001000968	EGAN00001001750	EGAX00001220020	EGAR00001233585
720	PD5892a	tumour	EGAS00001000968	EGAN00001001752	EGAX00001220022	EGAR00001233587
721	PD5893a	tumour	EGAS00001000968	EGAN00001001754	EGAX00001220024	EGAR00001233589
722	PD5894a	tumour	EGAS00001000968	EGAN00001001756	EGAX00001220026	EGAR00001233591
723	PD5895a	tumour	EGAS00001000968	EGAN00001001758	EGAX00001220028	EGAR00001233593
724	PD5896a	tumour	EGAS00001000968	EGAN00001001760	EGAX00001220030	EGAR00001233595
725	PD5897a	tumour	EGAS00001000968	EGAN00001001762	EGAX00001220032	EGAR00001233597
726	PD5898a	tumour	EGAS00001000968	EGAN00001001764	EGAX00001220034	EGAR00001233599
728	PD5900a	tumour	EGAS00001000968	EGAN00001001768	EGAX00001220036	EGAR00001233601
729	PD5901a	tumour	EGAS00001000968	EGAN00001001770	EGAX00001220038	EGAR00001233603
730	PD5902a	tumour	EGAS00001000968	EGAN00001001602	EGAX00001220040	EGAR00001233605
731	PD5903a	tumour	EGAS00001000968	EGAN00001001604	EGAX00001220042	EGAR00001233607
732	PD5904a	tumour	EGAS00001000968	EGAN00001001606	EGAX00001220044	EGAR00001233609
733	PD5905a	tumour	EGAS00001000968	EGAN00001001608	EGAX00001220046	EGAR00001233611
734	PD5906a	tumour	EGAS00001000968	EGAN00001001610	EGAX00001220048	EGAR00001233613
735	PD5907a	tumour	EGAS00001000968	EGAN00001001612	EGAX00001220050	EGAR00001233615
736	PD5908a	tumour	EGAS00001000968	EGAN00001001614	EGAX00001220052	EGAR00001233617
737	PD5909a	tumour	EGAS00001000968	EGAN00001001616	EGAX00001220054	EGAR00001233619
738	PD5911a	tumour	EGAS00001000968	EGAN00001001620	EGAX00001220056	EGAR00001233621
739	PD5915a	tumour	EGAS00001000968	EGAN00001226274	EGAX00001220058	EGAR00001233623
740	PD5916a	tumour	EGAS00001000968	EGAN00001226276	EGAX00001220060	EGAR00001233625
742	PD5918a	tumour	EGAS00001000968	EGAN00001226278	EGAX00001220062	EGAR00001233627
743	PD5919a	tumour	EGAS00001000968	EGAN00001226280	EGAX00001220064	EGAR00001233629
744	PD5920a	tumour	EGAS00001000968	EGAN00001226282	EGAX00001220066	EGAR00001233631
745	PD5921a	tumour	EGAS00001000968	EGAN00001226284	EGAX00001220068	EGAR00001233633
746	PD5922a	tumour	EGAS00001000968	EGAN00001226286	EGAX00001220070	EGAR00001233635
748	PD5924a	tumour	EGAS00001000968	EGAN00001226288	EGAX00001220072	EGAR00001233637
749	PD5925a	tumour	EGAS00001000968	EGAN00001030808	EGAX00001220074	EGAR00001233639
750	PD5928a	tumour	EGAS00001000968	EGAN00001032369	EGAX00001220076	EGAR00001233641
751	PD5930a	tumour	EGAS00001000968	EGAN00001030812	EGAX00001220078	EGAR00001233643
753	PD5934a	tumour	EGAS00001000968	EGAN00001030834	EGAX00001220080	EGAR00001233645
754	PD5935a	tumour	EGAS00001000968	EGAN00001030836	EGAX00001220082	EGAR00001233647
755	PD5936a	tumour	EGAS00001000968	EGAN00001032500	EGAX00001220084	EGAR00001233649
756	PD5937a	tumour	EGAS00001000968	EGAN00001087670	EGAX00001220086	EGAR00001233651
757	PD5938a	tumour	EGAS00001000968	EGAN00001087671	EGAX00001220088	EGAR00001233653
758	PD5942a	tumour	EGAS00001000968	EGAN00001030814	EGAX00001220090	EGAR00001233655
759	PD5944a	tumour	EGAS00001000968	EGAN00001030838	EGAX00001220092	EGAR00001233657
760	PD5945a	tumour	EGAS00001000968	EGAN00001030816	EGAX00001220094	EGAR00001233659
761	PD5946a	tumour	EGAS00001000968	EGAN00001087672	EGAX00001220096	EGAR00001233661
762	PD5947a	tumour	EGAS00001000968	EGAN00001032371	EGAX00001220098	EGAR00001233663
763	PD5948a	tumour	EGAS00001000968	EGAN00001030818	EGAX00001220100	EGAR00001233665
764	PD5950a	tumour	EGAS00001000968	EGAN00001030840	EGAX00001220102	EGAR00001233667
765	PD5951a	tumour	EGAS00001000968	EGAN00001037942	EGAX00001220104	EGAR00001233669
766	PD5953a	tumour	EGAS00001000968	EGAN00001087673	EGAX00001220106	EGAR00001233671
767	PD5954a	tumour	EGAS00001000968	EGAN00001087674	EGAX00001220108	EGAR00001233673
768	PD5956a	tumour	EGAS00001000968	EGAN00001037943	EGAX00001220110	EGAR00001233675
769	PD5959a	tumour	EGAS00001000968	EGAN00001087675	EGAX00001220112	EGAR00001233677
770	PD5960a	tumour	EGAS00001000968	EGAN00001087676	EGAX00001220114	EGAR00001233679
771	PD5961a	tumour	EGAS00001000968	EGAN00001037944	EGAX00001220116	EGAR00001233681
772	PD5964a	tumour	EGAS00001000968	EGAN00001087677	EGAX00001220118	EGAR00001233683
773	PD6016a2	tumour	EGAS00001000968	EGAN00001097159	EGAX00001220120	EGAR00001233685
774	PD6018a	tumour	EGAS00001000968	EGAN00001030810	EGAX00001220122	EGAR00001233687
775	PD6022a	tumour	EGAS00001000968	EGAN00001226290	EGAX00001220124	EGAR00001233689
776	PD6023a	tumour	EGAS00001000968	EGAN00001226292	EGAX00001220126	EGAR00001233691
777	PD6024a	tumour	EGAS00001000968	EGAN00001226294	EGAX00001220128	EGAR00001233693
778	PD6025a	tumour	EGAS00001000968	EGAN00001226296	EGAX00001220130	EGAR00001233695
779	PD6026a	tumour	EGAS00001000968	EGAN00001226298	EGAX00001220132	EGAR00001233697
780	PD6027a	tumour	EGAS00001000968	EGAN00001226300	EGAX00001220134	EGAR00001233699
781	PD6028a	tumour	EGAS00001000968	EGAN00001226302	EGAX00001220136	EGAR00001233701
782	PD6029a	tumour	EGAS00001000968	EGAN00001226304	EGAX00001220138	EGAR00001233703
783	PD6030a	tumour	EGAS00001000968	EGAN00001226306	EGAX00001220140	EGAR00001233705
785	PD6032a	tumour	EGAS00001000968	EGAN00001226308	EGAX00001220142	EGAR00001233707
786	PD6033a	tumour	EGAS00001000968	EGAN00001226310	EGAX00001220144	EGAR00001233709
787	PD6034a	tumour	EGAS00001000968	EGAN00001226312	EGAX00001220146	EGAR00001233711
788	PD6035a	tumour	EGAS00001000968	EGAN00001226314	EGAX00001220148	EGAR00001233713
790	PD6037a	tumour	EGAS00001000968	EGAN00001226316	EGAX00001220150	EGAR00001233715
791	PD6038a	tumour	EGAS00001000968	EGAN00001226318	EGAX00001220152	EGAR00001233717
792	PD6039a	tumour	EGAS00001000968	EGAN00001226320	EGAX00001220154	EGAR00001233719
793	PD6040a	tumour	EGAS00001000968	EGAN00001226322	EGAX00001220156	EGAR00001233721
794	PD6041a	tumour	EGAS00001000968	EGAN00001032357	EGAX00001220158	EGAR00001233723
795	PD6042a	tumour	EGAS00001000968	EGAN00001032359	EGAX00001220160	EGAR00001233725
796	PD6043a	tumour	EGAS00001000968	EGAN00001032361	EGAX00001220162	EGAR00001233727
797	PD6044a	tumour	EGAS00001000968	EGAN00001032363	EGAX00001220164	EGAR00001233729
798	PD6045a	tumour	EGAS00001000968	EGAN00001032365	EGAX00001220166	EGAR00001233731
799	PD6046a	tumour	EGAS00001000968	EGAN00001030804	EGAX00001220168	EGAR00001233733
800	PD6047a	tumour	EGAS00001000968	EGAN00001030806	EGAX00001220170	EGAR00001233735
802	PD6049a	tumour	EGAS00001000968	EGAN00001032367	EGAX00001220172	EGAR00001233737
803	PD6060a	tumour	EGAS00001000968	EGAN00001013493	EGAX00001220174	EGAR00001233739
804	PD6067a	tumour	EGAS00001000968	EGAN00001013494	EGAX00001220176	EGAR00001233741
805	PD6068a	tumour	EGAS00001000968	EGAN00001013495	EGAX00001220178	EGAR00001233743
806	PD6076a	tumour	EGAS00001000968	EGAN00001013496	EGAX00001220180	EGAR00001233745
807	PD6077a	tumour	EGAS00001000968	EGAN00001010169	EGAX00001220182	EGAR00001233747
808	PD6081a	tumour	EGAS00001000968	EGAN00001010165	EGAX00001220184	EGAR00001233749
809	PD6100a	tumour	EGAS00001000968	EGAN00001013497	EGAX00001220186	EGAR00001233751
810	PD6101a	tumour	EGAS00001000968	EGAN00001010168	EGAX00001220188	EGAR00001233753
811	PD6110a	tumour	EGAS00001000968	EGAN00001010172	EGAX00001220190	EGAR00001233755
812	PD6111a	tumour	EGAS00001000968	EGAN00001010170	EGAX00001220192	EGAR00001233757
813	PD6116a	tumour	EGAS00001000968	EGAN00001010166	EGAX00001220194	EGAR00001233759
814	PD6122a	tumour	EGAS00001000968	EGAN00001018566	EGAX00001220196	EGAR00001233761
815	PD6127a	tumour	EGAS00001000968	EGAN00001010167	EGAX00001220198	EGAR00001233763
816	PD6130a2	tumour	EGAS00001000968	EGAN00001073567	EGAX00001220200	EGAR00001233765
817	PD6177a	tumour	EGAS00001000968	EGAN00001010174	EGAX00001220202	EGAR00001233767
818	PD6188a2	tumour	EGAS00001000968	EGAN00001044107	EGAX00001220204	EGAR00001233769
819	PD6189a2	tumour	EGAS00001000968	EGAN00001042364	EGAX00001220206	EGAR00001233771
820	PD6190a2	tumour	EGAS00001000968	EGAN00001044108	EGAX00001220208	EGAR00001233773
822	PD6194a	tumour	EGAS00001000968	EGAN00001010176	EGAX00001220210	EGAR00001233775
823	PD6197a2	tumour	EGAS00001000968	EGAN00001042365	EGAX00001220212	EGAR00001233777
824	PD6198a2	tumour	EGAS00001000968	EGAN00001042366	EGAX00001220214	EGAR00001233779
827	PD6205a	tumour	EGAS00001000968	EGAN00001001622	EGAX00001220220	EGAR00001233785
828	PD6341a	tumour	EGAS00001000968	EGAN00001001772	EGAX00001220222	EGAR00001233787
829	PD6342a	tumour	EGAS00001000968	EGAN00001001774	EGAX00001220224	EGAR00001233789
830	PD6343a	tumour	EGAS00001000968	EGAN00001001776	EGAX00001220226	EGAR00001233791
831	PD6344a	tumour	EGAS00001000968	EGAN00001001778	EGAX00001220228	EGAR00001233793
832	PD6345a	tumour	EGAS00001000968	EGAN00001001780	EGAX00001220230	EGAR00001233795
835	PD6349a	tumour	EGAS00001000968	EGAN00001001786	EGAX00001220232	EGAR00001233797
836	PD6350a	tumour	EGAS00001000968	EGAN00001001788	EGAX00001220234	EGAR00001233799
837	PD6351a	tumour	EGAS00001000968	EGAN00001001790	EGAX00001220236	EGAR00001233801
838	PD6353a	tumour	EGAS00001000968	EGAN00001029545	EGAX00001220238	EGAR00001233803
839	PD6354a	tumour	EGAS00001000968	EGAN00001001792	EGAX00001220240	EGAR00001233805
840	PD6355a	tumour	EGAS00001000968	EGAN00001001794	EGAX00001220242	EGAR00001233807
841	PD6358a	tumour	EGAS00001000968	EGAN00001001796	EGAX00001220244	EGAR00001233809
842	PD6359a	tumour	EGAS00001000968	EGAN00001001798	EGAX00001220246	EGAR00001233811
843	PD6360a	tumour	EGAS00001000968	EGAN00001001800	EGAX00001220248	EGAR00001233813
844	PD6361a	tumour	EGAS00001000968	EGAN00001010233	EGAX00001220250	EGAR00001233815
845	PD6362a	tumour	EGAS00001000968	EGAN00001010234	EGAX00001220252	EGAR00001233817
846	PD6363a	tumour	EGAS00001000968	EGAN00001010235	EGAX00001220254	EGAR00001233819
847	PD6364a	tumour	EGAS00001000968	EGAN00001010228	EGAX00001220256	EGAR00001233821
848	PD6365a	tumour	EGAS00001000968	EGAN00001010229	EGAX00001220258	EGAR00001233823
849	PD6366a	tumour	EGAS00001000968	EGAN00001010230	EGAX00001220260	EGAR00001233825
850	PD6367a	tumour	EGAS00001000968	EGAN00001010231	EGAX00001220262	EGAR00001233827
852	PD6370a	tumour	EGAS00001000968	EGAN00001032470	EGAX00001220264	EGAR00001233829
854	PD6406a	tumour	EGAS00001000968	EGAN00001030908	EGAX00001220266	EGAR00001233831
855	PD6408a	tumour	EGAS00001000968	EGAN00001030454	EGAX00001220268	EGAR00001233833
856	PD6409a	tumour	EGAS00001000968	EGAN00001030911	EGAX00001220270	EGAR00001233835
857	PD6410a	tumour	EGAS00001000968	EGAN00001030913	EGAX00001220272	EGAR00001233837
858	PD6411a	tumour	EGAS00001000968	EGAN00001030915	EGAX00001220274	EGAR00001233839
859	PD6412a	tumour	EGAS00001000968	EGAN00001030917	EGAX00001220276	EGAR00001233841
860	PD6413a	tumour	EGAS00001000968	EGAN00001030824	EGAX00001220278	EGAR00001233843
861	PD6414a	tumour	EGAS00001000968	EGAN00001030918	EGAX00001220280	EGAR00001233845
862	PD6415a	tumour	EGAS00001000968	EGAN00001030920	EGAX00001220282	EGAR00001233847
863	PD6416a	tumour	EGAS00001000968	EGAN00001030922	EGAX00001220284	EGAR00001233849
865	PD6418a	tumour	EGAS00001000968	EGAN00001032502	EGAX00001220286	EGAR00001233851
866	PD6422a	tumour	EGAS00001000968	EGAN00001032503	EGAX00001220288	EGAR00001233853
867	PD6440a	tumour	EGAS00001000968	EGAN00001030842	EGAX00001220290	EGAR00001233855
869	PD6549a	tumour	EGAS00001000968	EGAN00001029579	EGAX00001220292	EGAR00001233857
870	PD6561a	tumour	EGAS00001000968	EGAN00001029580	EGAX00001220294	EGAR00001233859
871	PD6562a	tumour	EGAS00001000968	EGAN00001029581	EGAX00001220296	EGAR00001233861
872	PD6563a	tumour	EGAS00001000968	EGAN00001029582	EGAX00001220298	EGAR00001233863
873	PD6566a	tumour	EGAS00001000968	EGAN00001029583	EGAX00001220300	EGAR00001233865
874	PD6568a2	tumour	EGAS00001000968	EGAN00001030985	EGAX00001220302	EGAR00001233867
875	PD6573a	tumour	EGAS00001000968	EGAN00001029584	EGAX00001220304	EGAR00001233869
876	PD6593a	tumour	EGAS00001000968	EGAN00001029586	EGAX00001220306	EGAR00001233871
877	PD6597a	tumour	EGAS00001000968	EGAN00001029587	EGAX00001220308	EGAR00001233873
878	PD6598a2	tumour	EGAS00001000968	EGAN00001030986	EGAX00001220310	EGAR00001233875
879	PD6602a	tumour	EGAS00001000968	EGAN00001029588	EGAX00001220312	EGAR00001233877
880	PD6603a2	tumour	EGAS00001000968	EGAN00001030987	EGAX00001220314	EGAR00001233879
881	PD6606a	tumour	EGAS00001000968	EGAN00001029589	EGAX00001220316	EGAR00001233881
882	PD6620a2	tumour	EGAS00001000968	EGAN00001030988	EGAX00001220318	EGAR00001233883
883	PD6626a2	tumour	EGAS00001000968	EGAN00001030989	EGAX00001220320	EGAR00001233885
884	PD6628a2	tumour	EGAS00001000968	EGAN00001077889	EGAX00001220322	EGAR00001233887
885	PD6637a2	tumour	EGAS00001000968	EGAN00001077890	EGAX00001220324	EGAR00001233889
886	PD6647a2	tumour	EGAS00001000968	EGAN00001077891	EGAX00001220326	EGAR00001233891
887	PD6648a2	tumour	EGAS00001000968	EGAN00001030990	EGAX00001220328	EGAR00001233893
888	PD6650a2	tumour	EGAS00001000968	EGAN00001077892	EGAX00001220330	EGAR00001233895
889	PD6669a	tumour	EGAS00001000968	EGAN00001010013	EGAX00001220332	EGAR00001233897
890	PD6670a	tumour	EGAS00001000968	EGAN00001010014	EGAX00001220334	EGAR00001233899
891	PD6671a	tumour	EGAS00001000968	EGAN00001010015	EGAX00001220336	EGAR00001233901
892	PD6672a	tumour	EGAS00001000968	EGAN00001010016	EGAX00001220338	EGAR00001233903
893	PD6673a	tumour	EGAS00001000968	EGAN00001010017	EGAX00001220340	EGAR00001233905
894	PD6674a	tumour	EGAS00001000968	EGAN00001010018	EGAX00001220342	EGAR00001233907
895	PD6675a	tumour	EGAS00001000968	EGAN00001010019	EGAX00001220344	EGAR00001233909
896	PD6676a	tumour	EGAS00001000968	EGAN00001010020	EGAX00001220346	EGAR00001233911
897	PD6677a	tumour	EGAS00001000968	EGAN00001010021	EGAX00001220348	EGAR00001233913
898	PD6679a	tumour	EGAS00001000968	EGAN00001010023	EGAX00001220350	EGAR00001233915
899	PD6680a	tumour	EGAS00001000968	EGAN00001010024	EGAX00001220352	EGAR00001233917
900	PD6681a	tumour	EGAS00001000968	EGAN00001010025	EGAX00001220354	EGAR00001233919
901	PD6682a	tumour	EGAS00001000968	EGAN00001011408	EGAX00001220356	EGAR00001233921
902	PD6684a	tumour	EGAS00001000968	EGAN00001087652	EGAX00001220358	EGAR00001233923
903	PD6719a	tumour	EGAS00001000968	EGAN00001032463	EGAX00001220360	EGAR00001233925
904	PD6720a	tumour	EGAS00001000968	EGAN00001032465	EGAX00001220362	EGAR00001233927
906	PD6722a	tumour	EGAS00001000968	EGAN00001030844	EGAX00001220364	EGAR00001233929
908	PD6728a	tumour	EGAS00001000968	EGAN00001030848	EGAX00001220366	EGAR00001233931
909	PD6730a2	tumour	EGAS00001000968	EGAN00001066970	EGAX00001220368	EGAR00001233933
910	PD6732a	tumour	EGAS00001000968	EGAN00001030856	EGAX00001220370	EGAR00001233935
911	PD6733a	tumour	EGAS00001000968	EGAN00001030858	EGAX00001220372	EGAR00001233937
912	PD6744a	tumour	EGAS00001000968	EGAN00001028025	EGAX00001220374	EGAR00001233939
913	PD6745a	tumour	EGAS00001000968	EGAN00001028026	EGAX00001220376	EGAR00001233941
914	PD6746a	tumour	EGAS00001000968	EGAN00001028027	EGAX00001220378	EGAR00001233943
915	PD6747a	tumour	EGAS00001000968	EGAN00001028028	EGAX00001220380	EGAR00001233945
916	PD6748a	tumour	EGAS00001000968	EGAN00001028029	EGAX00001220382	EGAR00001233947
917	PD6749a	tumour	EGAS00001000968	EGAN00001028030	EGAX00001220384	EGAR00001233949
918	PD6750a	tumour	EGAS00001000968	EGAN00001028031	EGAX00001220386	EGAR00001233951
919	PD6751a	tumour	EGAS00001000968	EGAN00001028032	EGAX00001220388	EGAR00001233953
920	PD6752a	tumour	EGAS00001000968	EGAN00001028033	EGAX00001220390	EGAR00001233955
921	PD6753a	tumour	EGAS00001000968	EGAN00001028034	EGAX00001220392	EGAR00001233957
922	PD6754a	tumour	EGAS00001000968	EGAN00001018669	EGAX00001220394	EGAR00001233959
923	PD6755a	tumour	EGAS00001000968	EGAN00001028035	EGAX00001220396	EGAR00001233961
924	PD6756a	tumour	EGAS00001000968	EGAN00001028036	EGAX00001220398	EGAR00001233963
925	PD6757a	tumour	EGAS00001000968	EGAN00001028037	EGAX00001220400	EGAR00001233965
926	PD6759a	tumour	EGAS00001000968	EGAN00001028038	EGAX00001220402	EGAR00001233967
927	PD6760a	tumour	EGAS00001000968	EGAN00001028039	EGAX00001220404	EGAR00001233969
928	PD6761a	tumour	EGAS00001000968	EGAN00001028040	EGAX00001220406	EGAR00001233971
929	PD6762a	tumour	EGAS00001000968	EGAN00001028041	EGAX00001220408	EGAR00001233973
930	PD6763a	tumour	EGAS00001000968	EGAN00001018670	EGAX00001220410	EGAR00001233975
932	PD6765a	tumour	EGAS00001000968	EGAN00001018671	EGAX00001220412	EGAR00001233977
933	PD6767a	tumour	EGAS00001000968	EGAN00001028043	EGAX00001220414	EGAR00001233979
934	PD6804a2	tumour	EGAS00001000968	EGAN00001073569	EGAX00001220416	EGAR00001233981
936	PD6877a	tumour	EGAS00001000968	EGAN00001013498	EGAX00001220418	EGAR00001233983
937	PD6921a	tumour	EGAS00001000968	EGAN00001018569	EGAX00001220420	EGAR00001233985
938	PD6997a	tumour	EGAS00001000968	EGAN00001010171	EGAX00001220422	EGAR00001233987
939	PD7066a	tumour	EGAS00001000968	EGAN00001030869	EGAX00001220424	EGAR00001233989
940	PD7067a	tumour	EGAS00001000968	EGAN00001030870	EGAX00001220426	EGAR00001233991
941	PD7068a	tumour	EGAS00001000968	EGAN00001030871	EGAX00001220428	EGAR00001233993
942	PD7069a	tumour	EGAS00001000968	EGAN00001030872	EGAX00001220430	EGAR00001233995
943	PD7080a	tumour	EGAS00001000968	EGAN00001011410	EGAX00001220432	EGAR00001233997
944	PD7081a	tumour	EGAS00001000968	EGAN00001011411	EGAX00001220434	EGAR00001233999
945	PD7084a	tumour	EGAS00001000968	EGAN00001011412	EGAX00001220436	EGAR00001234001
946	PD7089a	tumour	EGAS00001000968	EGAN00001011413	EGAX00001220438	EGAR00001234003
947	PD7092a	tumour	EGAS00001000968	EGAN00001018578	EGAX00001220440	EGAR00001234005
948	PD7103a	tumour	EGAS00001000968	EGAN00001011415	EGAX00001220442	EGAR00001234007
949	PD7107a	tumour	EGAS00001000968	EGAN00001011416	EGAX00001220444	EGAR00001234009
950	PD7115a	tumour	EGAS00001000968	EGAN00001018572	EGAX00001220446	EGAR00001234011
951	PD7116a	tumour	EGAS00001000968	EGAN00001010175	EGAX00001220448	EGAR00001234013
952	PD7117a	tumour	EGAS00001000968	EGAN00001010177	EGAX00001220450	EGAR00001234015
953	PD7118a	tumour	EGAS00001000968	EGAN00001010178	EGAX00001220452	EGAR00001234017
954	PD7120a	tumour	EGAS00001000968	EGAN00001010179	EGAX00001220454	EGAR00001234019
955	PD7121a	tumour	EGAS00001000968	EGAN00001010180	EGAX00001220456	EGAR00001234021
956	PD7123a	tumour	EGAS00001000968	EGAN00001042375	EGAX00001220458	EGAR00001234023
957	PD7124a	tumour	EGAS00001000968	EGAN00001042376	EGAX00001220460	EGAR00001234025
958	PD7125a	tumour	EGAS00001000968	EGAN00001035919	EGAX00001220462	EGAR00001234027
959	PD7126a	tumour	EGAS00001000968	EGAN00001035920	EGAX00001220464	EGAR00001234029
960	PD7127a	tumour	EGAS00001000968	EGAN00001035921	EGAX00001220466	EGAR00001234031
961	PD7128a	tumour	EGAS00001000968	EGAN00001042377	EGAX00001220468	EGAR00001234033
962	PD7129a	tumour	EGAS00001000968	EGAN00001036778	EGAX00001220470	EGAR00001234035
963	PD7130a	tumour	EGAS00001000968	EGAN00001035922	EGAX00001220472	EGAR00001234037
964	PD7131a	tumour	EGAS00001000968	EGAN00001035923	EGAX00001220474	EGAR00001234039
965	PD7133a	tumour	EGAS00001000968	EGAN00001036779	EGAX00001220476	EGAR00001234041
966	PD7134a	tumour	EGAS00001000968	EGAN00001035924	EGAX00001220478	EGAR00001234043
967	PD7135a	tumour	EGAS00001000968	EGAN00001035925	EGAX00001220480	EGAR00001234045
968	PD7136a	tumour	EGAS00001000968	EGAN00001036780	EGAX00001220482	EGAR00001234047
969	PD7137a	tumour	EGAS00001000968	EGAN00001042378	EGAX00001220484	EGAR00001234049
970	PD7138a	tumour	EGAS00001000968	EGAN00001036781	EGAX00001220486	EGAR00001234051
971	PD7139a	tumour	EGAS00001000968	EGAN00001042379	EGAX00001220488	EGAR00001234053
972	PD7140a	tumour	EGAS00001000968	EGAN00001036782	EGAX00001220490	EGAR00001234055
973	PD7141a	tumour	EGAS00001000968	EGAN00001036783	EGAX00001220492	EGAR00001234057
974	PD7142a	tumour	EGAS00001000968	EGAN00001042380	EGAX00001220494	EGAR00001234059
975	PD7143a	tumour	EGAS00001000968	EGAN00001042381	EGAX00001220496	EGAR00001234061
976	PD7144a	tumour	EGAS00001000968	EGAN00001042382	EGAX00001220498	EGAR00001234063
977	PD7145a	tumour	EGAS00001000968	EGAN00001036784	EGAX00001220500	EGAR00001234065
978	PD7148a	tumour	EGAS00001000968	EGAN00001010181	EGAX00001220502	EGAR00001234067
979	PD7149a	tumour	EGAS00001000968	EGAN00001010182	EGAX00001220504	EGAR00001234069
980	PD7150a	tumour	EGAS00001000968	EGAN00001010183	EGAX00001220506	EGAR00001234071
981	PD7151a	tumour	EGAS00001000968	EGAN00001010184	EGAX00001220508	EGAR00001234073
982	PD7152a	tumour	EGAS00001000968	EGAN00001018575	EGAX00001220510	EGAR00001234075
983	PD7153a	tumour	EGAS00001000968	EGAN00001010185	EGAX00001220512	EGAR00001234077
984	PD7154a	tumour	EGAS00001000968	EGAN00001072058	EGAX00001220514	EGAR00001234079
985	PD7155a	tumour	EGAS00001000968	EGAN00001010187	EGAX00001220516	EGAR00001234081
986	PD7156a	tumour	EGAS00001000968	EGAN00001010188	EGAX00001220518	EGAR00001234083
987	PD7157a	tumour	EGAS00001000968	EGAN00001010189	EGAX00001220520	EGAR00001234085
988	PD7158a	tumour	EGAS00001000968	EGAN00001010190	EGAX00001220522	EGAR00001234087
989	PD7159a	tumour	EGAS00001000968	EGAN00001035989	EGAX00001220524	EGAR00001234089
990	PD7160a	tumour	EGAS00001000968	EGAN00001010191	EGAX00001220526	EGAR00001234091
991	PD7161a	tumour	EGAS00001000968	EGAN00001010192	EGAX00001220528	EGAR00001234093
992	PD7162a	tumour	EGAS00001000968	EGAN00001072062	EGAX00001220530	EGAR00001234095
993	PD7163a	tumour	EGAS00001000968	EGAN00001010194	EGAX00001220532	EGAR00001234097
994	PD7164a	tumour	EGAS00001000968	EGAN00001010195	EGAX00001220534	EGAR00001234099
995	PD7165a	tumour	EGAS00001000968	EGAN00001010196	EGAX00001220536	EGAR00001234101
996	PD7166a	tumour	EGAS00001000968	EGAN00001010197	EGAX00001220538	EGAR00001234103
998	PD7168a	tumour	EGAS00001000968	EGAN00001010199	EGAX00001220540	EGAR00001234105
999	PD7173a	tumour	EGAS00001000968	EGAN00001018666	EGAX00001220542	EGAR00001234107
1001	PD7180a	tumour	EGAS00001000968	EGAN00001010410	EGAX00001220544	EGAR00001234109
1002	PD7181a	tumour	EGAS00001000968	EGAN00001010218	EGAX00001220546	EGAR00001234111
1003	PD7183a	tumour	EGAS00001000968	EGAN00001032515	EGAX00001220548	EGAR00001234113
1004	PD7184a	tumour	EGAS00001000968	EGAN00001032516	EGAX00001220550	EGAR00001234115
1005	PD7185a	tumour	EGAS00001000968	EGAN00001032517	EGAX00001220552	EGAR00001234117
1006	PD7186a	tumour	EGAS00001000968	EGAN00001032518	EGAX00001220554	EGAR00001234119
1008	PD7188a	tumour	EGAS00001000968	EGAN00001018561	EGAX00001220556	EGAR00001234121
1009	PD7189a	tumour	EGAS00001000968	EGAN00001018562	EGAX00001220558	EGAR00001234123
1010	PD7190a	tumour	EGAS00001000968	EGAN00001029541	EGAX00001220560	EGAR00001234125
1011	PD7191a	tumour	EGAS00001000968	EGAN00001029542	EGAX00001220562	EGAR00001234127
1012	PD7192a	tumour	EGAS00001000968	EGAN00001029543	EGAX00001220564	EGAR00001234129
1013	PD7193a	tumour	EGAS00001000968	EGAN00001226329	EGAX00001220566	EGAR00001234131
1015	PD7195a	tumour	EGAS00001000968	EGAN00001029609	EGAX00001220568	EGAR00001234133
1016	PD7196a	tumour	EGAS00001000968	EGAN00001029506	EGAX00001220570	EGAR00001234135
1017	PD7197a	tumour	EGAS00001000968	EGAN00001029507	EGAX00001220572	EGAR00001234137
1018	PD7199a	tumour	EGAS00001000968	EGAN00001032471	EGAX00001220574	EGAR00001234139
1019	PD7201a	tumour	EGAS00001000968	EGAN00001032472	EGAX00001220576	EGAR00001234141
1023	PD7206a	tumour	EGAS00001000968	EGAN00001032473	EGAX00001220578	EGAR00001234143
1024	PD7207a	tumour	EGAS00001000968	EGAN00001032474	EGAX00001220580	EGAR00001234145
1025	PD7208a	tumour	EGAS00001000968	EGAN00001032475	EGAX00001220582	EGAR00001234147
1026	PD7209a	tumour	EGAS00001000968	EGAN00001032486	EGAX00001220584	EGAR00001234149
1027	PD7210a	tumour	EGAS00001000968	EGAN00001032487	EGAX00001220586	EGAR00001234151
1028	PD7211a	tumour	EGAS00001000968	EGAN00001011442	EGAX00001220588	EGAR00001234153
1029	PD7212a	tumour	EGAS00001000968	EGAN00001032488	EGAX00001220590	EGAR00001234155
1030	PD7214a	tumour	EGAS00001000968	EGAN00001032489	EGAX00001220592	EGAR00001234157
1031	PD7215a	tumour	EGAS00001000968	EGAN00001032490	EGAX00001220594	EGAR00001234159
1032	PD7216a	tumour	EGAS00001000968	EGAN00001032491	EGAX00001220596	EGAR00001234161
1033	PD7217a	tumour	EGAS00001000968	EGAN00001011443	EGAX00001220598	EGAR00001234163
1034	PD7218a	tumour	EGAS00001000968	EGAN00001032492	EGAX00001220600	EGAR00001234165
1035	PD7219a	tumour	EGAS00001000968	EGAN00001032493	EGAX00001220602	EGAR00001234167
1036	PD7221a	tumour	EGAS00001000968	EGAN00001032494	EGAX00001220604	EGAR00001234169
1037	PD7222a	tumour	EGAS00001000968	EGAN00001018581	EGAX00001220606	EGAR00001234171
1038	PD7223a	tumour	EGAS00001000968	EGAN00001016573	EGAX00001220608	EGAR00001234173
1039	PD7224a	tumour	EGAS00001000968	EGAN00001016574	EGAX00001220610	EGAR00001234175
1040	PD7225a	tumour	EGAS00001000968	EGAN00001016575	EGAX00001220612	EGAR00001234177
1041	PD7226a	tumour	EGAS00001000968	EGAN00001016576	EGAX00001220614	EGAR00001234179
1042	PD7227a	tumour	EGAS00001000968	EGAN00001016577	EGAX00001220616	EGAR00001234181
1043	PD7237a	tumour	EGAS00001000968	EGAN00001226330	EGAX00001220618	EGAR00001234183
1044	PD7238a	tumour	EGAS00001000968	EGAN00001087681	EGAX00001220620	EGAR00001234185
1045	PD7243a	tumour	EGAS00001000968	EGAN00001087682	EGAX00001220622	EGAR00001234187
1047	PD7252a	tumour	EGAS00001000968	EGAN00001013587	EGAX00001220624	EGAR00001234189
1048	PD7253a	tumour	EGAS00001000968	EGAN00001013588	EGAX00001220626	EGAR00001234191
1049	PD7254a	tumour	EGAS00001000968	EGAN00001013589	EGAX00001220628	EGAR00001234193
1050	PD7255a	tumour	EGAS00001000968	EGAN00001013590	EGAX00001220630	EGAR00001234195
1051	PD7256a	tumour	EGAS00001000968	EGAN00001013591	EGAX00001220632	EGAR00001234197
1052	PD7257a	tumour	EGAS00001000968	EGAN00001013592	EGAX00001220634	EGAR00001234199
1053	PD7258a	tumour	EGAS00001000968	EGAN00001013593	EGAX00001220636	EGAR00001234201
1054	PD7259a	tumour	EGAS00001000968	EGAN00001013594	EGAX00001220638	EGAR00001234203
1055	PD7260a	tumour	EGAS00001000968	EGAN00001013595	EGAX00001220640	EGAR00001234205
1056	PD7261a	tumour	EGAS00001000968	EGAN00001013596	EGAX00001220642	EGAR00001234207
1057	PD7262a	tumour	EGAS00001000968	EGAN00001013597	EGAX00001220644	EGAR00001234209
1058	PD7263a	tumour	EGAS00001000968	EGAN00001013598	EGAX00001220646	EGAR00001234211
1059	PD7266a	tumour	EGAS00001000968	EGAN00001013559	EGAX00001220648	EGAR00001234213
1060	PD7267a	tumour	EGAS00001000968	EGAN00001013560	EGAX00001220650	EGAR00001234215
1061	PD7268a	tumour	EGAS00001000968	EGAN00001013567	EGAX00001220652	EGAR00001234217
1062	PD7269a	tumour	EGAS00001000968	EGAN00001013568	EGAX00001220654	EGAR00001234219
1063	PD7270a	tumour	EGAS00001000968	EGAN00001013573	EGAX00001220656	EGAR00001234221
1064	PD7271a	tumour	EGAS00001000968	EGAN00001013574	EGAX00001220658	EGAR00001234223
1065	PD7272a	tumour	EGAS00001000968	EGAN00001013575	EGAX00001220660	EGAR00001234225
1066	PD7273a	tumour	EGAS00001000968	EGAN00001013579	EGAX00001220662	EGAR00001234227
1067	PD7274a	tumour	EGAS00001000968	EGAN00001013580	EGAX00001220664	EGAR00001234229
1068	PD7275a	tumour	EGAS00001000968	EGAN00001013582	EGAX00001220666	EGAR00001234231
1069	PD7276a	tumour	EGAS00001000968	EGAN00001013583	EGAX00001220668	EGAR00001234233
1070	PD7278a	tumour	EGAS00001000968	EGAN00001013584	EGAX00001220670	EGAR00001234235
1071	PD7279a	tumour	EGAS00001000968	EGAN00001013585	EGAX00001220672	EGAR00001234237
1072	PD7280a	tumour	EGAS00001000968	EGAN00001013508	EGAX00001220674	EGAR00001234239
1073	PD7281a	tumour	EGAS00001000968	EGAN00001013513	EGAX00001220676	EGAR00001234241
1074	PD7282a	tumour	EGAS00001000968	EGAN00001035926	EGAX00001220678	EGAR00001234243
1075	PD7283a	tumour	EGAS00001000968	EGAN00001036785	EGAX00001220680	EGAR00001234245
1076	PD7284a	tumour	EGAS00001000968	EGAN00001036786	EGAX00001220682	EGAR00001234247
1077	PD7285a	tumour	EGAS00001000968	EGAN00001036787	EGAX00001220684	EGAR00001234249
1078	PD7286a	tumour	EGAS00001000968	EGAN00001035927	EGAX00001220686	EGAR00001234251
1079	PD7288a	tumour	EGAS00001000968	EGAN00001042383	EGAX00001220688	EGAR00001234253
1080	PD7290a	tumour	EGAS00001000968	EGAN00001042384	EGAX00001220690	EGAR00001234255
1081	PD7291a	tumour	EGAS00001000968	EGAN00001042385	EGAX00001220692	EGAR00001234257
1082	PD7293a	tumour	EGAS00001000968	EGAN00001042386	EGAX00001220694	EGAR00001234259
1083	PD7295a	tumour	EGAS00001000968	EGAN00001042387	EGAX00001220696	EGAR00001234261
1084	PD7296a	tumour	EGAS00001000968	EGAN00001035931	EGAX00001220698	EGAR00001234263
1085	PD7297a	tumour	EGAS00001000968	EGAN00001042388	EGAX00001220700	EGAR00001234265
1086	PD7298a	tumour	EGAS00001000968	EGAN00001042389	EGAX00001220702	EGAR00001234267
1087	PD7299a	tumour	EGAS00001000968	EGAN00001018672	EGAX00001220704	EGAR00001234269
1088	PD7300a	tumour	EGAS00001000968	EGAN00001028044	EGAX00001220706	EGAR00001234271
1089	PD7301a	tumour	EGAS00001000968	EGAN00001028045	EGAX00001220708	EGAR00001234273
1090	PD7302a	tumour	EGAS00001000968	EGAN00001028046	EGAX00001220710	EGAR00001234275
1091	PD7303a	tumour	EGAS00001000968	EGAN00001018673	EGAX00001220712	EGAR00001234277
1096	PD7316a	tumour	EGAS00001000968	EGAN00001018552	EGAX00001220714	EGAR00001234279
1097	PD7321a	tumour	EGAS00001000968	EGAN00001018553	EGAX00001220716	EGAR00001234281
1098	PD7341a	tumour	EGAS00001000968	EGAN00001018554	EGAX00001220718	EGAR00001234283
1099	PD7344a	tumour	EGAS00001000968	EGAN00001018555	EGAX00001220720	EGAR00001234285
1100	PD7349a	tumour	EGAS00001000968	EGAN00001016578	EGAX00001220722	EGAR00001234287
1101	PD7350a	tumour	EGAS00001000968	EGAN00001018659	EGAX00001220724	EGAR00001234289
1102	PD7351a	tumour	EGAS00001000968	EGAN00001018660	EGAX00001220726	EGAR00001234291
1103	PD7352a	tumour	EGAS00001000968	EGAN00001018661	EGAX00001220728	EGAR00001234293
1105	PD7355a	tumour	EGAS00001000968	EGAN00001029410	EGAX00001220730	EGAR00001234295
1107	PD7392a	tumour	EGAS00001000968	EGAN00001018649	EGAX00001220732	EGAR00001234297
1108	PD7393a	tumour	EGAS00001000968	EGAN00001018650	EGAX00001220734	EGAR00001234299
1109	PD7394a	tumour	EGAS00001000968	EGAN00001018651	EGAX00001220736	EGAR00001234301
1110	PD7395a	tumour	EGAS00001000968	EGAN00001018624	EGAX00001220738	EGAR00001234303
1111	PD7396a	tumour	EGAS00001000968	EGAN00001018625	EGAX00001220740	EGAR00001234305
1112	PD7397a	tumour	EGAS00001000968	EGAN00001018626	EGAX00001220742	EGAR00001234307
1113	PD7398a	tumour	EGAS00001000968	EGAN00001018627	EGAX00001220744	EGAR00001234309
1114	PD7399a	tumour	EGAS00001000968	EGAN00001018628	EGAX00001220746	EGAR00001234311
1115	PD7400a	tumour	EGAS00001000968	EGAN00001018629	EGAX00001220748	EGAR00001234313
1116	PD7401a	tumour	EGAS00001000968	EGAN00001029508	EGAX00001220750	EGAR00001234315
1117	PD7404a	tumour	EGAS00001000968	EGAN00001030455	EGAX00001220752	EGAR00001234317
1118	PD7405a2	tumour	EGAS00001000968	EGAN00001066971	EGAX00001220754	EGAR00001234319
1119	PD7407a	tumour	EGAS00001000968	EGAN00001030457	EGAX00001220756	EGAR00001234321
1120	PD7408a	tumour	EGAS00001000968	EGAN00001030459	EGAX00001220758	EGAR00001234323
1121	PD7409a	tumour	EGAS00001000968	EGAN00001030461	EGAX00001220760	EGAR00001234325
1122	PD7410a	tumour	EGAS00001000968	EGAN00001030463	EGAX00001220762	EGAR00001234327
1123	PD7411a	tumour	EGAS00001000968	EGAN00001068075	EGAX00001220764	EGAR00001234329
1124	PD7412a	tumour	EGAS00001000968	EGAN00001068076	EGAX00001220766	EGAR00001234331
1125	PD7413a	tumour	EGAS00001000968	EGAN00001068077	EGAX00001220768	EGAR00001234333
1126	PD7414a	tumour	EGAS00001000968	EGAN00001065886	EGAX00001220770	EGAR00001234335
1127	PD7415a	tumour	EGAS00001000968	EGAN00001068078	EGAX00001220772	EGAR00001234337
1128	PD7416a	tumour	EGAS00001000968	EGAN00001065887	EGAX00001220774	EGAR00001234339
1129	PD7418a	tumour	EGAS00001000968	EGAN00001065888	EGAX00001220776	EGAR00001234341
1130	PD7419a	tumour	EGAS00001000968	EGAN00001068079	EGAX00001220778	EGAR00001234343
1131	PD7421a	tumour	EGAS00001000968	EGAN00001068080	EGAX00001220780	EGAR00001234345
1132	PD7422a	tumour	EGAS00001000968	EGAN00001065889	EGAX00001220782	EGAR00001234347
1133	PD7423a	tumour	EGAS00001000968	EGAN00001068081	EGAX00001220784	EGAR00001234349
1134	PD7424a	tumour	EGAS00001000968	EGAN00001073753	EGAX00001220786	EGAR00001234351
1135	PD7425a	tumour	EGAS00001000968	EGAN00001068083	EGAX00001220788	EGAR00001234353
1136	PD7426a	tumour	EGAS00001000968	EGAN00001030465	EGAX00001220790	EGAR00001234355
1138	PD7428a	tumour	EGAS00001000968	EGAN00001030469	EGAX00001220792	EGAR00001234357
1139	PD7429a	tumour	EGAS00001000968	EGAN00001068084	EGAX00001220794	EGAR00001234359
1140	PD7430a	tumour	EGAS00001000968	EGAN00001068085	EGAX00001220796	EGAR00001234361
1141	PD7431a	tumour	EGAS00001000968	EGAN00001030471	EGAX00001220798	EGAR00001234363
1142	PD7432a	tumour	EGAS00001000968	EGAN00001068086	EGAX00001220800	EGAR00001234365
1143	PD7433a	tumour	EGAS00001000968	EGAN00001030473	EGAX00001220802	EGAR00001234367
1144	PD7434a	tumour	EGAS00001000968	EGAN00001068087	EGAX00001220804	EGAR00001234369
1145	PD7435a	tumour	EGAS00001000968	EGAN00001068088	EGAX00001220806	EGAR00001234371
1146	PD7436a	tumour	EGAS00001000968	EGAN00001029590	EGAX00001220808	EGAR00001234373
1147	PD7437a	tumour	EGAS00001000968	EGAN00001029591	EGAX00001220810	EGAR00001234375
1148	PD7438a	tumour	EGAS00001000968	EGAN00001029592	EGAX00001220812	EGAR00001234377
1149	PD7439a	tumour	EGAS00001000968	EGAN00001029593	EGAX00001220814	EGAR00001234379
1150	PD7440a	tumour	EGAS00001000968	EGAN00001029594	EGAX00001220816	EGAR00001234381
1151	PD7441a	tumour	EGAS00001000968	EGAN00001029595	EGAX00001220818	EGAR00001234383
1152	PD7442a	tumour	EGAS00001000968	EGAN00001029596	EGAX00001220820	EGAR00001234385
1153	PD7443a	tumour	EGAS00001000968	EGAN00001029597	EGAX00001220822	EGAR00001234387
1154	PD7444a	tumour	EGAS00001000968	EGAN00001029598	EGAX00001220824	EGAR00001234389
1155	PD7445a	tumour	EGAS00001000968	EGAN00001226332	EGAX00001220826	EGAR00001234391
1156	PD7446a	tumour	EGAS00001000968	EGAN00001226334	EGAX00001220828	EGAR00001234393
1157	PD7447a	tumour	EGAS00001000968	EGAN00001226336	EGAX00001220830	EGAR00001234395
1158	PD7507a	tumour	EGAS00001000968	EGAN00001031753	EGAX00001220832	EGAR00001234397
1159	PD7508a	tumour	EGAS00001000968	EGAN00001031754	EGAX00001220834	EGAR00001234399
1160	PD7509a	tumour	EGAS00001000968	EGAN00001031755	EGAX00001220836	EGAR00001234401
1161	PD7510a	tumour	EGAS00001000968	EGAN00001031756	EGAX00001220838	EGAR00001234403
1162	PD7511a	tumour	EGAS00001000968	EGAN00001031757	EGAX00001220840	EGAR00001234405
1163	PD7512a	tumour	EGAS00001000968	EGAN00001031758	EGAX00001220842	EGAR00001234407
1164	PD7513a	tumour	EGAS00001000968	EGAN00001031759	EGAX00001220844	EGAR00001234409
1165	PD7514a	tumour	EGAS00001000968	EGAN00001031760	EGAX00001220846	EGAR00001234411
1166	PD7515a	tumour	EGAS00001000968	EGAN00001031761	EGAX00001220848	EGAR00001234413
1167	PD7516a	tumour	EGAS00001000968	EGAN00001031762	EGAX00001220850	EGAR00001234415
1168	PD7517a	tumour	EGAS00001000968	EGAN00001031763	EGAX00001220852	EGAR00001234417
1169	PD7518a	tumour	EGAS00001000968	EGAN00001031764	EGAX00001220854	EGAR00001234419
1170	PD7519a	tumour	EGAS00001000968	EGAN00001031765	EGAX00001220856	EGAR00001234421
1171	PD7520a	tumour	EGAS00001000968	EGAN00001031766	EGAX00001220858	EGAR00001234423
1172	PD7521a	tumour	EGAS00001000968	EGAN00001031767	EGAX00001220860	EGAR00001234425
1173	PD7522a	tumour	EGAS00001000968	EGAN00001031768	EGAX00001220862	EGAR00001234427
1174	PD7523a	tumour	EGAS00001000968	EGAN00001036771	EGAX00001220864	EGAR00001234429
1175	PD7524a	tumour	EGAS00001000968	EGAN00001036772	EGAX00001220866	EGAR00001234431
1176	PD7525a	tumour	EGAS00001000968	EGAN00001036773	EGAX00001220868	EGAR00001234433
1177	PD7526a	tumour	EGAS00001000968	EGAN00001036774	EGAX00001220870	EGAR00001234435
1178	PD7527a	tumour	EGAS00001000968	EGAN00001036775	EGAX00001220872	EGAR00001234437
1179	PD7528a	tumour	EGAS00001000968	EGAN00001036776	EGAX00001220874	EGAR00001234439
1180	PD7529a	tumour	EGAS00001000968	EGAN00001036777	EGAX00001220876	EGAR00001234441
1181	PD7530a	tumour	EGAS00001000968	EGAN00001188989	EGAX00001220878	EGAR00001234443
1182	PD7584a	tumour	EGAS00001000968	EGAN00001035953	EGAX00001220880	EGAR00001234445
1183	PD7585a	tumour	EGAS00001000968	EGAN00001035954	EGAX00001220882	EGAR00001234447
1184	PD7586a	tumour	EGAS00001000968	EGAN00001073201	EGAX00001220884	EGAR00001234449
1185	PD7587a	tumour	EGAS00001000968	EGAN00001073202	EGAX00001220886	EGAR00001234451
1186	PD7588a	tumour	EGAS00001000968	EGAN00001073203	EGAX00001220888	EGAR00001234453
1187	PD7589a	tumour	EGAS00001000968	EGAN00001073204	EGAX00001220890	EGAR00001234455
1188	PD7596a	tumour	EGAS00001000968	EGAN00001073205	EGAX00001220892	EGAR00001234457
1189	PD7597a	tumour	EGAS00001000968	EGAN00001073206	EGAX00001220894	EGAR00001234459
1190	PD7598a	tumour	EGAS00001000968	EGAN00001073207	EGAX00001220896	EGAR00001234461
1191	PD7605a	tumour	EGAS00001000968	EGAN00001036811	EGAX00001220898	EGAR00001234463
1192	PD8595a	tumour	EGAS00001000968	EGAN00001067587	EGAX00001220900	EGAR00001234465
1193	PD8596a	tumour	EGAS00001000968	EGAN00001067588	EGAX00001220902	EGAR00001234467
1194	PD8597a	tumour	EGAS00001000968	EGAN00001031089	EGAX00001220904	EGAR00001234469
1195	PD8598a	tumour	EGAS00001000968	EGAN00001067589	EGAX00001220906	EGAR00001234471
1196	PD8599a	tumour	EGAS00001000968	EGAN00001067586	EGAX00001220908	EGAR00001234473
1197	PD8600a	tumour	EGAS00001000968	EGAN00001067584	EGAX00001220910	EGAR00001234475
1199	PD8602a	tumour	EGAS00001000968	EGAN00001030948	EGAX00001220912	EGAR00001234477
1200	PD8603a	tumour	EGAS00001000968	EGAN00001031091	EGAX00001220914	EGAR00001234479
1201	PD8604a	tumour	EGAS00001000968	EGAN00001077351	EGAX00001220916	EGAR00001234481
1202	PD8605a	tumour	EGAS00001000968	EGAN00001031090	EGAX00001220918	EGAR00001234483
1203	PD8607a	tumour	EGAS00001000968	EGAN00001087653	EGAX00001220920	EGAR00001234485
1204	PD8608a	tumour	EGAS00001000968	EGAN00001087654	EGAX00001220922	EGAR00001234487
1205	PD8609a	tumour	EGAS00001000968	EGAN00001037946	EGAX00001220924	EGAR00001234489
1206	PD8610a	tumour	EGAS00001000968	EGAN00001087655	EGAX00001220926	EGAR00001234491
1207	PD8611a	tumour	EGAS00001000968	EGAN00001088358	EGAX00001220928	EGAR00001234493
1208	PD8618a	tumour	EGAS00001000968	EGAN00001037947	EGAX00001220930	EGAR00001234495
1209	PD8621a	tumour	EGAS00001000968	EGAN00001037949	EGAX00001220932	EGAR00001234497
1210	PD8622a	tumour	EGAS00001000968	EGAN00001037948	EGAX00001220934	EGAR00001234499
1211	PD8623a	tumour	EGAS00001000968	EGAN00001037945	EGAX00001220936	EGAR00001234501
1212	PD8624a	tumour	EGAS00001000968	EGAN00001030965	EGAX00001220938	EGAR00001234503
1213	PD8625a	tumour	EGAS00001000968	EGAN00001030966	EGAX00001220940	EGAR00001234505
1214	PD8626a	tumour	EGAS00001000968	EGAN00001030967	EGAX00001220942	EGAR00001234507
1215	PD8627a	tumour	EGAS00001000968	EGAN00001030968	EGAX00001220944	EGAR00001234509
1216	PD8628a	tumour	EGAS00001000968	EGAN00001030969	EGAX00001220946	EGAR00001234511
1217	PD8629a	tumour	EGAS00001000968	EGAN00001030970	EGAX00001220948	EGAR00001234513
1218	PD8630a	tumour	EGAS00001000968	EGAN00001030971	EGAX00001220950	EGAR00001234515
1219	PD8631a	tumour	EGAS00001000968	EGAN00001030991	EGAX00001220952	EGAR00001234517
1220	PD8632a	tumour	EGAS00001000968	EGAN00001030992	EGAX00001220954	EGAR00001234519
1221	PD8633a	tumour	EGAS00001000968	EGAN00001030993	EGAX00001220956	EGAR00001234521
1222	PD8634a	tumour	EGAS00001000968	EGAN00001030994	EGAX00001220958	EGAR00001234523
1223	PD8635a	tumour	EGAS00001000968	EGAN00001030995	EGAX00001220960	EGAR00001234525
1225	PD8637a	tumour	EGAS00001000968	EGAN00001030997	EGAX00001220962	EGAR00001234527
1226	PD8640a	tumour	EGAS00001000968	EGAN00001030999	EGAX00001220964	EGAR00001234529
1227	PD8641a	tumour	EGAS00001000968	EGAN00001031000	EGAX00001220966	EGAR00001234531
1228	PD8642a	tumour	EGAS00001000968	EGAN00001031001	EGAX00001220968	EGAR00001234533
1229	PD8643a	tumour	EGAS00001000968	EGAN00001031002	EGAX00001220970	EGAR00001234535
1230	PD8644a	tumour	EGAS00001000968	EGAN00001031003	EGAX00001220972	EGAR00001234537
1231	PD8733a2	tumour	EGAS00001000968	EGAN00001042367	EGAX00001220974	EGAR00001234539
1232	PD8736a2	tumour	EGAS00001000968	EGAN00001042368	EGAX00001220976	EGAR00001234541
1233	PD8737a2	tumour	EGAS00001000968	EGAN00001042369	EGAX00001220978	EGAR00001234543
1234	PD8738a2	tumour	EGAS00001000968	EGAN00001042370	EGAX00001220980	EGAR00001234545
1235	PD8739a2	tumour	EGAS00001000968	EGAN00001042371	EGAX00001220982	EGAR00001234547
1237	PD8830a	tumour	EGAS00001000968	EGAN00001088361	EGAX00001220984	EGAR00001234549
1238	PD8832a	tumour	EGAS00001000968	EGAN00001088362	EGAX00001220986	EGAR00001234551
1239	PD8834a	tumour	EGAS00001000968	EGAN00001036808	EGAX00001220988	EGAR00001234553
1240	PD8942a	tumour	EGAS00001000968	EGAN00001077893	EGAX00001220990	EGAR00001234555
1241	PD8943a	tumour	EGAS00001000968	EGAN00001077894	EGAX00001220992	EGAR00001234557
1242	PD8944a	tumour	EGAS00001000968	EGAN00001077895	EGAX00001220994	EGAR00001234559
1243	PD8945a	tumour	EGAS00001000968	EGAN00001077896	EGAX00001220996	EGAR00001234561
1244	PD8949a2	tumour	EGAS00001000968	EGAN00001085691	EGAX00001220998	EGAR00001234563
1245	PD8950a	tumour	EGAS00001000968	EGAN00001085692	EGAX00001221000	EGAR00001234565
1246	PD8952a2	tumour	EGAS00001000968	EGAN00001085693	EGAX00001221002	EGAR00001234567
1247	PD8953a2	tumour	EGAS00001000968	EGAN00001085694	EGAX00001221004	EGAR00001234569
1248	PD8956a2	tumour	EGAS00001000968	EGAN00001085695	EGAX00001221006	EGAR00001234571
1249	PD8964a	tumour	EGAS00001000968	EGAN00001088365	EGAX00001221008	EGAR00001234573
1250	PD8966a	tumour	EGAS00001000968	EGAN00001088366	EGAX00001221010	EGAR00001234575
1251	PD8969a	tumour	EGAS00001000968	EGAN00001088364	EGAX00001221012	EGAR00001234577
1252	PD8973a	tumour	EGAS00001000968	EGAN00001073538	EGAX00001221014	EGAR00001234579
1253	PD8978a	tumour	EGAS00001000968	EGAN00001087656	EGAX00001221016	EGAR00001234581
1254	PD8979a	tumour	EGAS00001000968	EGAN00001087657	EGAX00001221018	EGAR00001234583
1255	PD8980a	tumour	EGAS00001000968	EGAN00001087658	EGAX00001221020	EGAR00001234585
1256	PD8981a	tumour	EGAS00001000968	EGAN00001087659	EGAX00001221022	EGAR00001234587
1257	PD8993a	tumour	EGAS00001000968	EGAN00001226338	EGAX00001221024	EGAR00001234589
1262	PD8999a	tumour	EGAS00001000968	EGAN00001097157	EGAX00001221026	EGAR00001234591
1263	PD9000a	tumour	EGAS00001000968	EGAN00001072667	EGAX00001221028	EGAR00001234593
1264	PD9001a	tumour	EGAS00001000968	EGAN00001072668	EGAX00001221030	EGAR00001234595
1265	PD9002a	tumour	EGAS00001000968	EGAN00001072669	EGAX00001221032	EGAR00001234597
1266	PD9004a	tumour	EGAS00001000968	EGAN00001226339	EGAX00001221034	EGAR00001234599
1267	PD9024a	tumour	EGAS00001000968	EGAN00001042348	EGAX00001221036	EGAR00001234601
1268	PD9025a	tumour	EGAS00001000968	EGAN00001042349	EGAX00001221038	EGAR00001234603
1269	PD9026a	tumour	EGAS00001000968	EGAN00001042350	EGAX00001221040	EGAR00001234605
1270	PD9027a	tumour	EGAS00001000968	EGAN00001042351	EGAX00001221042	EGAR00001234607
1271	PD9028a	tumour	EGAS00001000968	EGAN00001042352	EGAX00001221044	EGAR00001234609
1272	PD9029a	tumour	EGAS00001000968	EGAN00001042354	EGAX00001221046	EGAR00001234611
1273	PD9030a	tumour	EGAS00001000968	EGAN00001042355	EGAX00001221048	EGAR00001234613
1274	PD9031a	tumour	EGAS00001000968	EGAN00001042356	EGAX00001221050	EGAR00001234615
1275	PD9032a	tumour	EGAS00001000968	EGAN00001067826	EGAX00001221052	EGAR00001234617
1276	PD9033a	tumour	EGAS00001000968	EGAN00001042357	EGAX00001221054	EGAR00001234619
1277	PD9052a	tumour	EGAS00001000968	EGAN00001096034	EGAX00001221056	EGAR00001234621
1278	PD9053a	tumour	EGAS00001000968	EGAN00001096035	EGAX00001221058	EGAR00001234623
1279	PD9054a	tumour	EGAS00001000968	EGAN00001096036	EGAX00001221060	EGAR00001234625
1280	PD9055a	tumour	EGAS00001000968	EGAN00001096037	EGAX00001221062	EGAR00001234627
1281	PD9056a	tumour	EGAS00001000968	EGAN00001226341	EGAX00001221064	EGAR00001234629
1282	PD9061a	tumour	EGAS00001000968	EGAN00001042346	EGAX00001221066	EGAR00001234631
1283	PD9168a	tumour	EGAS00001000968	EGAN00001226343	EGAX00001221068	EGAR00001234633
1284	PD9169a	tumour	EGAS00001000968	EGAN00001226345	EGAX00001221070	EGAR00001234635
1285	PD9170a	tumour	EGAS00001000968	EGAN00001226347	EGAX00001221072	EGAR00001234637
1286	PD9171a	tumour	EGAS00001000968	EGAN00001226349	EGAX00001221074	EGAR00001234639
1287	PD9172a	tumour	EGAS00001000968	EGAN00001073579	EGAX00001221076	EGAR00001234641
1288	PD9193a	tumour	EGAS00001000968	EGAN00001066968	EGAX00001221078	EGAR00001234643
1289	PD9194a	tumour	EGAS00001000968	EGAN00001226351	EGAX00001221080	EGAR00001234645
1290	PD9195a	tumour	EGAS00001000968	EGAN00001226353	EGAX00001221082	EGAR00001234647
1291	PD9196a	tumour	EGAS00001000968	EGAN00001069968	EGAX00001221084	EGAR00001234649
1292	PD9398a	tumour	EGAS00001000968	EGAN00001096039	EGAX00001221086	EGAR00001234651
1293	PD9409a	tumour	EGAS00001000968	EGAN00001042299	EGAX00001221088	EGAR00001234653
1294	PD9410a	tumour	EGAS00001000968	EGAN00001042304	EGAX00001221090	EGAR00001234655
1295	PD9411a	tumour	EGAS00001000968	EGAN00001042305	EGAX00001221092	EGAR00001234657
1296	PD9412a	tumour	EGAS00001000968	EGAN00001042302	EGAX00001221094	EGAR00001234659
1297	PD9415a	tumour	EGAS00001000968	EGAN00001042306	EGAX00001221096	EGAR00001234661
1298	PD9416a	tumour	EGAS00001000968	EGAN00001042307	EGAX00001221098	EGAR00001234663
1299	PD9417a	tumour	EGAS00001000968	EGAN00001042298	EGAX00001221100	EGAR00001234665
1300	PD9418a	tumour	EGAS00001000968	EGAN00001042308	EGAX00001221102	EGAR00001234667
1301	PD9419a	tumour	EGAS00001000968	EGAN00001042324	EGAX00001221104	EGAR00001234669
1302	PD9420a	tumour	EGAS00001000968	EGAN00001042318	EGAX00001221106	EGAR00001234671
1303	PD9423a	tumour	EGAS00001000968	EGAN00001042310	EGAX00001221108	EGAR00001234673
1304	PD9476a	tumour	EGAS00001000968	EGAN00001073551	EGAX00001221110	EGAR00001234675
1305	PD9478a	tumour	EGAS00001000968	EGAN00001073553	EGAX00001221112	EGAR00001234677
1306	PD9479a	tumour	EGAS00001000968	EGAN00001073555	EGAX00001221114	EGAR00001234679
1307	PD9539a	tumour	EGAS00001000968	EGAN00001088392	EGAX00001221116	EGAR00001234681
1308	PD9541a	tumour	EGAS00001000968	EGAN00001088393	EGAX00001221118	EGAR00001234683
1309	PD9544a	tumour	EGAS00001000968	EGAN00001088394	EGAX00001221120	EGAR00001234685
1310	PD9567a	tumour	EGAS00001000968	EGAN00001073539	EGAX00001221122	EGAR00001234687
1311	PD9568a	tumour	EGAS00001000968	EGAN00001226355	EGAX00001221124	EGAR00001234689
1312	PD9569a	tumour	EGAS00001000968	EGAN00001073541	EGAX00001221126	EGAR00001234691
1313	PD9570a	tumour	EGAS00001000968	EGAN00001073542	EGAX00001221128	EGAR00001234693
1314	PD9571a	tumour	EGAS00001000968	EGAN00001226357	EGAX00001221130	EGAR00001234695
1315	PD9572a	tumour	EGAS00001000968	EGAN00001073544	EGAX00001221132	EGAR00001234697
1316	PD9573a	tumour	EGAS00001000968	EGAN00001073545	EGAX00001221134	EGAR00001234699
1317	PD9574a	tumour	EGAS00001000968	EGAN00001073546	EGAX00001221136	EGAR00001234701
1318	PD9575a	tumour	EGAS00001000968	EGAN00001226359	EGAX00001221138	EGAR00001234703
1319	PD9577a	tumour	EGAS00001000968	EGAN00001087660	EGAX00001221140	EGAR00001234705
1320	PD9582a	tumour	EGAS00001000968	EGAN00001087661	EGAX00001221142	EGAR00001234707
1321	PD9589a	tumour	EGAS00001000968	EGAN00001073160	EGAX00001221144	EGAR00001234709
1322	PD9592a	tumour	EGAS00001000968	EGAN00001072677	EGAX00001221146	EGAR00001234711
1323	PD9593a	tumour	EGAS00001000968	EGAN00001087662	EGAX00001221148	EGAR00001234713
1324	PD9595a	tumour	EGAS00001000968	EGAN00001072678	EGAX00001221150	EGAR00001234715
1325	PD9596a	tumour	EGAS00001000968	EGAN00001097156	EGAX00001221152	EGAR00001234717
1326	PD9597a	tumour	EGAS00001000968	EGAN00001087664	EGAX00001221154	EGAR00001234719
1327	PD9599a	tumour	EGAS00001000968	EGAN00001087665	EGAX00001221156	EGAR00001234721
1328	PD9604a	tumour	EGAS00001000968	EGAN00001072679	EGAX00001221158	EGAR00001234723
1329	PD9605a	tumour	EGAS00001000968	EGAN00001087666	EGAX00001221160	EGAR00001234725
1330	PD9664a	tumour	EGAS00001000968	EGAN00001069970	EGAX00001221162	EGAR00001234727
1331	PD9665a	tumour	EGAS00001000968	EGAN00001068035	EGAX00001221164	EGAR00001234729
1332	PD9666a	tumour	EGAS00001000968	EGAN00001068036	EGAX00001221166	EGAR00001234731
1334	PD9668a	tumour	EGAS00001000968	EGAN00001069972	EGAX00001221168	EGAR00001234733
1335	PD9669a	tumour	EGAS00001000968	EGAN00001068037	EGAX00001221170	EGAR00001234735
1336	PD9670a	tumour	EGAS00001000968	EGAN00001068038	EGAX00001221172	EGAR00001234737
1337	PD9671a	tumour	EGAS00001000968	EGAN00001068039	EGAX00001221174	EGAR00001234739
1338	PD9672a	tumour	EGAS00001000968	EGAN00001069973	EGAX00001221176	EGAR00001234741
1339	PD9673a	tumour	EGAS00001000968	EGAN00001073747	EGAX00001221178	EGAR00001234743
1340	PD9674a	tumour	EGAS00001000968	EGAN00001069974	EGAX00001221180	EGAR00001234745
1341	PD9675a	tumour	EGAS00001000968	EGAN00001073748	EGAX00001221182	EGAR00001234747
1342	PD9676a	tumour	EGAS00001000968	EGAN00001069975	EGAX00001221184	EGAR00001234749
1343	PD9677a	tumour	EGAS00001000968	EGAN00001068042	EGAX00001221186	EGAR00001234751
1344	PD9678a	tumour	EGAS00001000968	EGAN00001069976	EGAX00001221188	EGAR00001234753
1345	PD9679a	tumour	EGAS00001000968	EGAN00001069977	EGAX00001221190	EGAR00001234755
1346	PD9680a	tumour	EGAS00001000968	EGAN00001069978	EGAX00001221192	EGAR00001234757
1347	PD9681a	tumour	EGAS00001000968	EGAN00001073749	EGAX00001221194	EGAR00001234759
1348	PD9682a	tumour	EGAS00001000968	EGAN00001069979	EGAX00001221196	EGAR00001234761
1349	PD9683a	tumour	EGAS00001000968	EGAN00001073750	EGAX00001221198	EGAR00001234763
1350	PD9684a	tumour	EGAS00001000968	EGAN00001069980	EGAX00001221200	EGAR00001234765
1351	PD9685a	tumour	EGAS00001000968	EGAN00001069981	EGAX00001221202	EGAR00001234767
1352	PD9686a	tumour	EGAS00001000968	EGAN00001068045	EGAX00001221204	EGAR00001234769
1353	PD9687a	tumour	EGAS00001000968	EGAN00001069982	EGAX00001221206	EGAR00001234771
1354	PD9688a	tumour	EGAS00001000968	EGAN00001069983	EGAX00001221208	EGAR00001234773
1355	PD9689a	tumour	EGAS00001000968	EGAN00001069984	EGAX00001221210	EGAR00001234775
1357	PD9691a	tumour	EGAS00001000968	EGAN00001069986	EGAX00001221212	EGAR00001234777
1358	PD9692a	tumour	EGAS00001000968	EGAN00001069987	EGAX00001221214	EGAR00001234779
1360	PD9696a	tumour	EGAS00001000968	EGAN00001072681	EGAX00001221216	EGAR00001234781
1361	PD9702a	tumour	EGAS00001000968	EGAN00001072682	EGAX00001221218	EGAR00001234783
1362	PD9746a	tumour	EGAS00001000968	EGAN00001226361	EGAX00001221220	EGAR00001234785
1363	PD9749a	tumour	EGAS00001000968	EGAN00001226363	EGAX00001221222	EGAR00001234787
1364	PD9751a	tumour	EGAS00001000968	EGAN00001226365	EGAX00001221224	EGAR00001234789
1365	PD9752a	tumour	EGAS00001000968	EGAN00001088395	EGAX00001221226	EGAR00001234791
1366	PD9754a	tumour	EGAS00001000968	EGAN00001088396	EGAX00001221228	EGAR00001234793
1367	PD9755a	tumour	EGAS00001000968	EGAN00001088397	EGAX00001221230	EGAR00001234795
1368	PD9756a	tumour	EGAS00001000968	EGAN00001088398	EGAX00001221232	EGAR00001234797
1369	PD9757a	tumour	EGAS00001000968	EGAN00001088399	EGAX00001221234	EGAR00001234799
1370	PD9758a	tumour	EGAS00001000968	EGAN00001226367	EGAX00001221236	EGAR00001234801
1371	PD9759a	tumour	EGAS00001000968	EGAN00001088401	EGAX00001221238	EGAR00001234803
1372	PD9760a	tumour	EGAS00001000968	EGAN00001088402	EGAX00001221240	EGAR00001234805
1373	PD9761a	tumour	EGAS00001000968	EGAN00001088403	EGAX00001221242	EGAR00001234807
1375	PD9769c	tumour	EGAS00001000968	EGAN00001094481	EGAX00001221245	EGAR00001234810
1376	PD9770c	tumour	EGAS00001000968	EGAN00001073165	EGAX00001221247	EGAR00001234812
1377	PD9771a	tumour	EGAS00001000968	EGAN00001075344	EGAX00001221248	EGAR00001234813
1378	PD9772a	tumour	EGAS00001000968	EGAN00001075347	EGAX00001221250	EGAR00001234815
1379	PD9773a	tumour	EGAS00001000968	EGAN00001075348	EGAX00001221252	EGAR00001234817
1380	PD9774a	tumour	EGAS00001000968	EGAN00001075350	EGAX00001221254	EGAR00001234819
1381	PD9775a	tumour	EGAS00001000968	EGAN00001073167	EGAX00001221256	EGAR00001234821
1382	PD9776a	tumour	EGAS00001000968	EGAN00001073169	EGAX00001221258	EGAR00001234823
1383	PD9777a	tumour	EGAS00001000968	EGAN00001075353	EGAX00001221260	EGAR00001234825
1385	PD9843a	tumour	EGAS00001000968	EGAN00001087668	EGAX00001221262	EGAR00001234827
1386	PD9845a	tumour	EGAS00001000968	EGAN00001088406	EGAX00001221264	EGAR00001234829
1387	PD9847a	tumour	EGAS00001000968	EGAN00001087669	EGAX00001221266	EGAR00001234831
1388	PD9849a	tumour	EGAS00001000968	EGAN00001226369	EGAX00001221268	EGAR00001234833
1389	PD9916a	tumour	EGAS00001000968	EGAN00001032679	EGAX00001221270	EGAR00001234835
1390	PD9917a	tumour	EGAS00001000968	EGAN00001032680	EGAX00001221272	EGAR00001234837
1391	PD9920a	tumour	EGAS00001000968	EGAN00001032678	EGAX00001221274	EGAR00001234839
1392	PD9921a	tumour	EGAS00001000968	EGAN00001032682	EGAX00001221276	EGAR00001234841
1393	PD9922a	tumour	EGAS00001000968	EGAN00001032677	EGAX00001221278	EGAR00001234843
1394	PD9923a	tumour	EGAS00001000968	EGAN00001032681	EGAX00001221280	EGAR00001234845
1395	PD9924a2	tumour	EGAS00001000968	EGAN00001089466	EGAX00001221282	EGAR00001234847
1397	PD9927a2	tumour	EGAS00001000968	EGAN00001089469	EGAX00001221284	EGAR00001234849
1398	PD9928a	tumour	EGAS00001000968	EGAN00001077302	EGAX00001221286	EGAR00001234851
1399	PD9933a	tumour	EGAS00001000968	EGAN00001085696	EGAX00001221288	EGAR00001234853
1400	PD9965a	tumour	EGAS00001000968	EGAN00001096040	EGAX00001221290	EGAR00001234855
1401	PD9967a	tumour	EGAS00001000968	EGAN00001096041	EGAX00001221292	EGAR00001234857
1402	PD9968a	tumour	EGAS00001000968	EGAN00001096042	EGAX00001221294	EGAR00001234859
1403	PD9970a	tumour	EGAS00001000968	EGAN00001096043	EGAX00001221296	EGAR00001234861
1404	PD9971a	tumour	EGAS00001000968	EGAN00001096044	EGAX00001221298	EGAR00001234863
1405	PD9973a	tumour	EGAS00001000968	EGAN00001096045	EGAX00001221300	EGAR00001234865
1406	PD9974a	tumour	EGAS00001000968	EGAN00001096046	EGAX00001221302	EGAR00001234867
1407	PD9978a	tumour	EGAS00001000968	EGAN00001096047	EGAX00001221304	EGAR00001234869
1408	PD9980a	tumour	EGAS00001000968	EGAN00001096048	EGAX00001221306	EGAR00001234871
1409	PD9981a	tumour	EGAS00001000968	EGAN00001096049	EGAX00001221308	EGAR00001234873
1410	PD9983a	tumour	EGAS00001000968	EGAN00001096050	EGAX00001221310	EGAR00001234875
1411	PD9984a	tumour	EGAS00001000968	EGAN00001096051	EGAX00001221312	EGAR00001234877
1412	PD9985a	tumour	EGAS00001000968	EGAN00001096052	EGAX00001221314	EGAR00001234879
1413	PD9986a	tumour	EGAS00001000968	EGAN00001096053	EGAX00001221316	EGAR00001234881
1414	PD9989a	tumour	EGAS00001000968	EGAN00001096054	EGAX00001221318	EGAR00001234883
1415	PD9999a	tumour	EGAS00001000968	EGAN00001096055	EGAX00001221320	EGAR00001234885
15	PD10010b	normal	EGAS00001000968	EGAN00001087683	EGAX00001218725	EGAR00001232290				EGAS00001000968	EGAN00001096092	EGAX00001221319	EGAR00001234884	PD9989b	1414
16	PD10014b	normal	EGAS00001000968	EGAN00001226013	EGAX00001218727	EGAR00001232292				EGAS00001000968	EGAN00001096093	EGAX00001221321	EGAR00001234886	PD9999b	1415
18	PD10020b	normal	EGAS00001000968	EGAN00001226015	EGAX00001218729	EGAR00001232294
19	PD10021b	normal	EGAS00001000968	EGAN00001226017	EGAX00001218731	EGAR00001232296
20	PD10022b	normal	EGAS00001000968	EGAN00001226019	EGAX00001218733	EGAR00001232298
21	PD10051b	normal	EGAS00001000968	EGAN00001072480	EGAX00001218735	EGAR00001232300
22	PD10052b	normal	EGAS00001000968	EGAN00001072492	EGAX00001218737	EGAR00001232302
23	PD10053b	normal	EGAS00001000968	EGAN00001072481	EGAX00001218739	EGAR00001232304
24	PD10054b	normal	EGAS00001000968	EGAN00001072482	EGAX00001218741	EGAR00001232306
25	PD10055b	normal	EGAS00001000968	EGAN00001072493	EGAX00001218743	EGAR00001232308
26	PD10056b	normal	EGAS00001000968	EGAN00001072484	EGAX00001218745	EGAR00001232310
27	PD10057b	normal	EGAS00001000968	EGAN00001072485	EGAX00001218747	EGAR00001232312
28	PD10058b	normal	EGAS00001000968	EGAN00001072486	EGAX00001218749	EGAR00001232314
29	PD10059b	normal	EGAS00001000968	EGAN00001072487	EGAX00001218751	EGAR00001232316
30	PD10060b	normal	EGAS00001000968	EGAN00001072488	EGAX00001218753	EGAR00001232318
31	PD10061b	normal	EGAS00001000968	EGAN00001072489	EGAX00001218755	EGAR00001232320
32	PD10062b	normal	EGAS00001000968	EGAN00001072490	EGAX00001218757	EGAR00001232322
33	PD10063b	normal	EGAS00001000968	EGAN00001072491	EGAX00001218759	EGAR00001232324
35	PD11290b	normal	EGAS00001000968	EGAN00001085165	EGAX00001218761	EGAR00001232326
36	PD11291b	normal	EGAS00001000968	EGAN00001085166	EGAX00001218763	EGAR00001232328
37	PD11292b	normal	EGAS00001000968	EGAN00001085167	EGAX00001218765	EGAR00001232330
38	PD11293b	normal	EGAS00001000968	EGAN00001085168	EGAX00001218767	EGAR00001232332
39	PD11294b	normal	EGAS00001000968	EGAN00001085169	EGAX00001218769	EGAR00001232334
40	PD11295b	normal	EGAS00001000968	EGAN00001085170	EGAX00001218771	EGAR00001232336
42	PD11328b	normal	EGAS00001000968	EGAN00001226020	EGAX00001218772	EGAR00001232337
43	PD11329b	normal	EGAS00001000968	EGAN00001226023	EGAX00001218775	EGAR00001232340
44	PD11330b	normal	EGAS00001000968	EGAN00001226024	EGAX00001218776	EGAR00001232341
45	PD11331b	normal	EGAS00001000968	EGAN00001226026	EGAX00001218778	EGAR00001232343
46	PD11332b	normal	EGAS00001000968	EGAN00001226028	EGAX00001218780	EGAR00001232345
47	PD11333b	normal	EGAS00001000968	EGAN00001226031	EGAX00001218783	EGAR00001232348
48	PD11334b	normal	EGAS00001000968	EGAN00001226033	EGAX00001218785	EGAR00001232350
49	PD11335b	normal	EGAS00001000968	EGAN00001226035	EGAX00001218787	EGAR00001232352
50	PD11336b	normal	EGAS00001000968	EGAN00001087685	EGAX00001218789	EGAR00001232354
51	PD11337b	normal	EGAS00001000968	EGAN00001087686	EGAX00001218791	EGAR00001232356
52	PD11338b	normal	EGAS00001000968	EGAN00001087687	EGAX00001218793	EGAR00001232358
53	PD11339b	normal	EGAS00001000968	EGAN00001087688	EGAX00001218795	EGAR00001232360
54	PD11340b	normal	EGAS00001000968	EGAN00001087689	EGAX00001218797	EGAR00001232362
55	PD11341b	normal	EGAS00001000968	EGAN00001087690	EGAX00001218799	EGAR00001232364
56	PD11342b	normal	EGAS00001000968	EGAN00001087691	EGAX00001218801	EGAR00001232366
57	PD11343b	normal	EGAS00001000968	EGAN00001087692	EGAX00001218803	EGAR00001232368
58	PD11369b	normal	EGAS00001000968	EGAN00001088338	EGAX00001218805	EGAR00001232370
59	PD11372b	normal	EGAS00001000968	EGAN00001088339	EGAX00001218807	EGAR00001232372
60	PD11374b	normal	EGAS00001000968	EGAN00001088340	EGAX00001218809	EGAR00001232374
61	PD11375b	normal	EGAS00001000968	EGAN00001088341	EGAX00001218811	EGAR00001232376
62	PD11376b	normal	EGAS00001000968	EGAN00001088342	EGAX00001218813	EGAR00001232378
63	PD11377b	normal	EGAS00001000968	EGAN00001088343	EGAX00001218815	EGAR00001232380
64	PD11379b	normal	EGAS00001000968	EGAN00001088345	EGAX00001218817	EGAR00001232382
65	PD11380b	normal	EGAS00001000968	EGAN00001088346	EGAX00001218819	EGAR00001232384
66	PD11381b	normal	EGAS00001000968	EGAN00001088347	EGAX00001218821	EGAR00001232386
67	PD11382b	normal	EGAS00001000968	EGAN00001088348	EGAX00001218823	EGAR00001232388
68	PD11383b	normal	EGAS00001000968	EGAN00001088349	EGAX00001218825	EGAR00001232390
69	PD11384b	normal	EGAS00001000968	EGAN00001088350	EGAX00001218827	EGAR00001232392
70	PD11385b	normal	EGAS00001000968	EGAN00001088351	EGAX00001218829	EGAR00001232394
71	PD11389b	normal	EGAS00001000968	EGAN00001088352	EGAX00001218831	EGAR00001232396
72	PD11390b	normal	EGAS00001000968	EGAN00001088353	EGAX00001218833	EGAR00001232398
73	PD11391b	normal	EGAS00001000968	EGAN00001092760	EGAX00001218835	EGAR00001232400
74	PD11394b	normal	EGAS00001000968	EGAN00001088354	EGAX00001218837	EGAR00001232402
75	PD11396b	normal	EGAS00001000968	EGAN00001088355	EGAX00001218839	EGAR00001232404
76	PD11398b	normal	EGAS00001000968	EGAN00001088356	EGAX00001218841	EGAR00001232406
77	PD11399b	normal	EGAS00001000968	EGAN00001088357	EGAX00001218843	EGAR00001232408
78	PD11403b	normal	EGAS00001000968	EGAN00001226037	EGAX00001218845	EGAR00001232410
79	PD11404b	normal	EGAS00001000968	EGAN00001226039	EGAX00001218847	EGAR00001232412
80	PD11405b	normal	EGAS00001000968	EGAN00001226041	EGAX00001218849	EGAR00001232414
81	PD11406b	normal	EGAS00001000968	EGAN00001088295	EGAX00001218851	EGAR00001232416
82	PD11411b	normal	EGAS00001000968	EGAN00001096871	EGAX00001218853	EGAR00001232418
84	PD11421b	normal	EGAS00001000968	EGAN00001096874	EGAX00001218855	EGAR00001232420
85	PD11424b	normal	EGAS00001000968	EGAN00001096875	EGAX00001218857	EGAR00001232422
86	PD11471b	normal	EGAS00001000968	EGAN00001088298	EGAX00001218859	EGAR00001232424
87	PD11781b	normal	EGAS00001000968	EGAN00001074741	EGAX00001218861	EGAR00001232426
88	PD11783b	normal	EGAS00001000968	EGAN00001074726	EGAX00001218863	EGAR00001232428
89	PD11795b	normal	EGAS00001000968	EGAN00001074708	EGAX00001218865	EGAR00001232430
90	PD11800b	normal	EGAS00001000968	EGAN00001074716	EGAX00001218867	EGAR00001232432
91	PD11818b	normal	EGAS00001000968	EGAN00001088335	EGAX00001218869	EGAR00001232434
92	PD11819b	normal	EGAS00001000968	EGAN00001088336	EGAX00001218871	EGAR00001232436
93	PD12330b	normal	EGAS00001000968	EGAN00001096385	EGAX00001218873	EGAR00001232438
94	PD12337b	normal	EGAS00001000968	EGAN00001226043	EGAX00001218875	EGAR00001232440
95	PD12354b	normal	EGAS00001000968	EGAN00001094663	EGAX00001218877	EGAR00001232442
97	PD12356b	normal	EGAS00001000968	EGAN00001094665	EGAX00001218879	EGAR00001232444
98	PD12357b	normal	EGAS00001000968	EGAN00001094666	EGAX00001218881	EGAR00001232446
99	PD12358b	normal	EGAS00001000968	EGAN00001094667	EGAX00001218883	EGAR00001232448
100	PD12359b	normal	EGAS00001000968	EGAN00001094668	EGAX00001218885	EGAR00001232450
101	PD12360b	normal	EGAS00001000968	EGAN00001094669	EGAX00001218887	EGAR00001232452
102	PD12361b	normal	EGAS00001000968	EGAN00001094670	EGAX00001218889	EGAR00001232454
103	PD12362b	normal	EGAS00001000968	EGAN00001094671	EGAX00001218891	EGAR00001232456
104	PD12363b	normal	EGAS00001000968	EGAN00001094672	EGAX00001218893	EGAR00001232458
105	PD12364b	normal	EGAS00001000968	EGAN00001094673	EGAX00001218895	EGAR00001232460
106	PD12366b	normal	EGAS00001000968	EGAN00001094674	EGAX00001218897	EGAR00001232462
107	PD12367b	normal	EGAS00001000968	EGAN00001094675	EGAX00001218899	EGAR00001232464
108	PD12370b	normal	EGAS00001000968	EGAN00001096094	EGAX00001218901	EGAR00001232466
109	PD12430b	normal	EGAS00001000968	EGAN00001096095	EGAX00001218903	EGAR00001232468
110	PD12431b	normal	EGAS00001000968	EGAN00001096096	EGAX00001218905	EGAR00001232470
111	PD12435b	normal	EGAS00001000968	EGAN00001096097	EGAX00001218907	EGAR00001232472
112	PD12445b	normal	EGAS00001000968	EGAN00001096099	EGAX00001218909	EGAR00001232474
113	PD12446b	normal	EGAS00001000968	EGAN00001096100	EGAX00001218911	EGAR00001232476
114	PD12447b	normal	EGAS00001000968	EGAN00001096098	EGAX00001218913	EGAR00001232478
115	PD12448b	normal	EGAS00001000968	EGAN00001096101	EGAX00001218915	EGAR00001232480
116	PD12449b	normal	EGAS00001000968	EGAN00001096102	EGAX00001218917	EGAR00001232482
117	PD12453b	normal	EGAS00001000968	EGAN00001096104	EGAX00001218919	EGAR00001232484
118	PD12454b	normal	EGAS00001000968	EGAN00001096103	EGAX00001218921	EGAR00001232486
119	PD12455b	normal	EGAS00001000968	EGAN00001096105	EGAX00001218923	EGAR00001232488
120	PD12456b	normal	EGAS00001000968	EGAN00001096106	EGAX00001218925	EGAR00001232490
121	PD12458b	normal	EGAS00001000968	EGAN00001096107	EGAX00001218927	EGAR00001232492
122	PD12461b	normal	EGAS00001000968	EGAN00001096108	EGAX00001218929	EGAR00001232494
123	PD12462b	normal	EGAS00001000968	EGAN00001096109	EGAX00001218931	EGAR00001232496
125	PD12807b	normal	EGAS00001000968	EGAN00001226045	EGAX00001218933	EGAR00001232498
127	PD12809b	normal	EGAS00001000968	EGAN00001226047	EGAX00001218935	EGAR00001232500
129	PD12811b	normal	EGAS00001000968	EGAN00001226049	EGAX00001218937	EGAR00001232502
130	PD12812b	normal	EGAS00001000968	EGAN00001226051	EGAX00001218939	EGAR00001232504
131	PD12813b	normal	EGAS00001000968	EGAN00001226053	EGAX00001218941	EGAR00001232506
132	PD12814b	normal	EGAS00001000968	EGAN00001226055	EGAX00001218943	EGAR00001232508
133	PD12815b	normal	EGAS00001000968	EGAN00001226057	EGAX00001218945	EGAR00001232510
134	PD12816b	normal	EGAS00001000968	EGAN00001226059	EGAX00001218947	EGAR00001232512
135	PD12817b	normal	EGAS00001000968	EGAN00001226061	EGAX00001218949	EGAR00001232514
136	PD12818b	normal	EGAS00001000968	EGAN00001226063	EGAX00001218951	EGAR00001232516
137	PD12819b	normal	EGAS00001000968	EGAN00001226065	EGAX00001218953	EGAR00001232518
138	PD12820b	normal	EGAS00001000968	EGAN00001226067	EGAX00001218955	EGAR00001232520
139	PD12821b	normal	EGAS00001000968	EGAN00001226069	EGAX00001218957	EGAR00001232522
140	PD12822b	normal	EGAS00001000968	EGAN00001226071	EGAX00001218959	EGAR00001232524
141	PD12823b	normal	EGAS00001000968	EGAN00001226073	EGAX00001218961	EGAR00001232526
142	PD12824b	normal	EGAS00001000968	EGAN00001226075	EGAX00001218963	EGAR00001232528
143	PD12825b	normal	EGAS00001000968	EGAN00001226077	EGAX00001218965	EGAR00001232530
144	PD12826b	normal	EGAS00001000968	EGAN00001226079	EGAX00001218967	EGAR00001232532
145	PD12827b	normal	EGAS00001000968	EGAN00001226081	EGAX00001218969	EGAR00001232534
146	PD12828b	normal	EGAS00001000968	EGAN00001226083	EGAX00001218971	EGAR00001232536
147	PD12829b	normal	EGAS00001000968	EGAN00001226085	EGAX00001218973	EGAR00001232538
148	PD12830b	normal	EGAS00001000968	EGAN00001226087	EGAX00001218975	EGAR00001232540
150	PD12832b	normal	EGAS00001000968	EGAN00001226089	EGAX00001218977	EGAR00001232542
151	PD12834b	normal	EGAS00001000968	EGAN00001226091	EGAX00001218979	EGAR00001232544
152	PD12835b	normal	EGAS00001000968	EGAN00001226093	EGAX00001218981	EGAR00001232546
153	PD12836b	normal	EGAS00001000968	EGAN00001226095	EGAX00001218983	EGAR00001232548
154	PD12837b	normal	EGAS00001000968	EGAN00001226097	EGAX00001218985	EGAR00001232550
155	PD12838b	normal	EGAS00001000968	EGAN00001226099	EGAX00001218987	EGAR00001232552
156	PD12839b	normal	EGAS00001000968	EGAN00001226101	EGAX00001218989	EGAR00001232554
159	PD12844b	normal	EGAS00001000968	EGAN00001226103	EGAX00001218991	EGAR00001232556
160	PD12845b	normal	EGAS00001000968	EGAN00001226105	EGAX00001218993	EGAR00001232558
161	PD12846b	normal	EGAS00001000968	EGAN00001094685	EGAX00001218995	EGAR00001232560
162	PD12847b	normal	EGAS00001000968	EGAN00001094686	EGAX00001218997	EGAR00001232562
163	PD12848b	normal	EGAS00001000968	EGAN00001094687	EGAX00001218999	EGAR00001232564
164	PD12849b	normal	EGAS00001000968	EGAN00001094688	EGAX00001219001	EGAR00001232566
165	PD12850b	normal	EGAS00001000968	EGAN00001094689	EGAX00001219003	EGAR00001232568
166	PD12851b	normal	EGAS00001000968	EGAN00001094690	EGAX00001219005	EGAR00001232570
167	PD12853b	normal	EGAS00001000968	EGAN00001094691	EGAX00001219007	EGAR00001232572
168	PD12854b	normal	EGAS00001000968	EGAN00001094692	EGAX00001219009	EGAR00001232574
170	PD13336b	normal	EGAS00001000968	EGAN00001094694	EGAX00001219011	EGAR00001232576
173	PD13381b	normal	EGAS00001000968	EGAN00001226107	EGAX00001219013	EGAR00001232578
174	PD13382b	normal	EGAS00001000968	EGAN00001226109	EGAX00001219015	EGAR00001232580
175	PD13383b	normal	EGAS00001000968	EGAN00001226111	EGAX00001219017	EGAR00001232582
176	PD13384b	normal	EGAS00001000968	EGAN00001226113	EGAX00001219019	EGAR00001232584
177	PD13386b	normal	EGAS00001000968	EGAN00001226115	EGAX00001219021	EGAR00001232586
178	PD13387b	normal	EGAS00001000968	EGAN00001226117	EGAX00001219023	EGAR00001232588
179	PD13388b	normal	EGAS00001000968	EGAN00001226119	EGAX00001219025	EGAR00001232590
180	PD13389b	normal	EGAS00001000968	EGAN00001226121	EGAX00001219027	EGAR00001232592
181	PD13390b	normal	EGAS00001000968	EGAN00001226123	EGAX00001219029	EGAR00001232594
182	PD13391b	normal	EGAS00001000968	EGAN00001226125	EGAX00001219031	EGAR00001232596
183	PD13392b	normal	EGAS00001000968	EGAN00001226127	EGAX00001219033	EGAR00001232598
184	PD13394b	normal	EGAS00001000968	EGAN00001226129	EGAX00001219035	EGAR00001232600
185	PD13395b	normal	EGAS00001000968	EGAN00001226131	EGAX00001219037	EGAR00001232602
186	PD13396b	normal	EGAS00001000968	EGAN00001226133	EGAX00001219039	EGAR00001232604
187	PD13397b	normal	EGAS00001000968	EGAN00001226135	EGAX00001219041	EGAR00001232606
188	PD13398b	normal	EGAS00001000968	EGAN00001226137	EGAX00001219043	EGAR00001232608
189	PD13400b	normal	EGAS00001000968	EGAN00001226139	EGAX00001219045	EGAR00001232610
191	PD13402b	normal	EGAS00001000968	EGAN00001226141	EGAX00001219047	EGAR00001232612
192	PD13403b	normal	EGAS00001000968	EGAN00001226143	EGAX00001219049	EGAR00001232614
193	PD13404b	normal	EGAS00001000968	EGAN00001226145	EGAX00001219051	EGAR00001232616
194	PD13405b	normal	EGAS00001000968	EGAN00001226147	EGAX00001219053	EGAR00001232618
195	PD13406b	normal	EGAS00001000968	EGAN00001226149	EGAX00001219055	EGAR00001232620
196	PD13407b	normal	EGAS00001000968	EGAN00001226151	EGAX00001219057	EGAR00001232622
197	PD13408b	normal	EGAS00001000968	EGAN00001226153	EGAX00001219059	EGAR00001232624
198	PD13409b	normal	EGAS00001000968	EGAN00001226155	EGAX00001219061	EGAR00001232626
199	PD13410b	normal	EGAS00001000968	EGAN00001226157	EGAX00001219063	EGAR00001232628
200	PD13411b	normal	EGAS00001000968	EGAN00001226159	EGAX00001219065	EGAR00001232630
201	PD13412b	normal	EGAS00001000968	EGAN00001226161	EGAX00001219067	EGAR00001232632
203	PD2126b	normal	EGAS00001000968	EGAN00001000658	EGAX00001219069	EGAR00001232634
204	PD2127b	normal	EGAS00001000968	EGAN00001000660	EGAX00001219071	EGAR00001232636
205	PD2144b	normal	EGAS00001000968	EGAN00001000662	EGAX00001219073	EGAR00001232638
206	PD2147b	normal	EGAS00001000968	EGAN00001000804	EGAX00001219075	EGAR00001232640
207	PD2155b	normal	EGAS00001000968	EGAN00001000818	EGAX00001219077	EGAR00001232642
208	PD2156b	normal	EGAS00001000968	EGAN00001000839	EGAX00001219079	EGAR00001232644
209	PD2158b	normal	EGAS00001000968	EGAN00001000835	EGAX00001219081	EGAR00001232646
210	PD2160b	normal	EGAS00001000968	EGAN00001000837	EGAX00001219083	EGAR00001232648
211	PD2162b	normal	EGAS00001000968	EGAN00001000808	EGAX00001219085	EGAR00001232650
212	PD2170b	normal	EGAS00001000968	EGAN00001000810	EGAX00001219087	EGAR00001232652
213	PD2172b	normal	EGAS00001000968	EGAN00001000812	EGAX00001219089	EGAR00001232654
214	PD2175b	normal	EGAS00001000968	EGAN00001000814	EGAX00001219091	EGAR00001232656
215	PD2176b	normal	EGAS00001000968	EGAN00001000816	EGAX00001219093	EGAR00001232658
216	PD2184b	normal	EGAS00001000968	EGAN00001000819	EGAX00001219095	EGAR00001232660
217	PD2185b	normal	EGAS00001000968	EGAN00001000652	EGAX00001219097	EGAR00001232662
218	PD2192b	normal	EGAS00001000968	EGAN00001000821	EGAX00001219099	EGAR00001232664
219	PD2202b	normal	EGAS00001000968	EGAN00001000823	EGAX00001219101	EGAR00001232666
220	PD2208b	normal	EGAS00001000968	EGAN00001000825	EGAX00001219103	EGAR00001232668
221	PD2213b	normal	EGAS00001000968	EGAN00001000827	EGAX00001219105	EGAR00001232670
222	PD2216b	normal	EGAS00001000968	EGAN00001000830	EGAX00001219107	EGAR00001232672
223	PD3178b	normal	EGAS00001000968	EGAN00001035865	EGAX00001219109	EGAR00001232674
224	PD3179b	normal	EGAS00001000968	EGAN00001035866	EGAX00001219111	EGAR00001232676
225	PD3180b	normal	EGAS00001000968	EGAN00001035867	EGAX00001219113	EGAR00001232678
226	PD3181b	normal	EGAS00001000968	EGAN00001035868	EGAX00001219115	EGAR00001232680
227	PD3182b	normal	EGAS00001000968	EGAN00001035869	EGAX00001219117	EGAR00001232682
228	PD3183b	normal	EGAS00001000968	EGAN00001035870	EGAX00001219119	EGAR00001232684
229	PD3184b	normal	EGAS00001000968	EGAN00001035871	EGAX00001219121	EGAR00001232686
230	PD3185b	normal	EGAS00001000968	EGAN00001035872	EGAX00001219123	EGAR00001232688
231	PD3186b	normal	EGAS00001000968	EGAN00001035873	EGAX00001219125	EGAR00001232690
232	PD3187b	normal	EGAS00001000968	EGAN00001035874	EGAX00001219127	EGAR00001232692
233	PD3188b	normal	EGAS00001000968	EGAN00001035875	EGAX00001219129	EGAR00001232694
234	PD3189b	normal	EGAS00001000968	EGAN00001035876	EGAX00001219131	EGAR00001232696
235	PD3190b	normal	EGAS00001000968	EGAN00001035877	EGAX00001219133	EGAR00001232698
236	PD3191b	normal	EGAS00001000968	EGAN00001035878	EGAX00001219135	EGAR00001232700
237	PD3192b	normal	EGAS00001000968	EGAN00001035879	EGAX00001219137	EGAR00001232702
238	PD3193b	normal	EGAS00001000968	EGAN00001035880	EGAX00001219139	EGAR00001232704
239	PD3194b	normal	EGAS00001000968	EGAN00001035881	EGAX00001219141	EGAR00001232706
240	PD3195b	normal	EGAS00001000968	EGAN00001035882	EGAX00001219143	EGAR00001232708
241	PD3196b	normal	EGAS00001000968	EGAN00001035883	EGAX00001219145	EGAR00001232710
242	PD3197b	normal	EGAS00001000968	EGAN00001035884	EGAX00001219147	EGAR00001232712
243	PD3198b	normal	EGAS00001000968	EGAN00001035885	EGAX00001219149	EGAR00001232714
244	PD3199b	normal	EGAS00001000968	EGAN00001035886	EGAX00001219151	EGAR00001232716
245	PD3200b	normal	EGAS00001000968	EGAN00001035887	EGAX00001219153	EGAR00001232718
246	PD3208b	normal	EGAS00001000968	EGAN00001035888	EGAX00001219155	EGAR00001232720
247	PD3216b	normal	EGAS00001000968	EGAN00001035889	EGAX00001219157	EGAR00001232722
248	PD3226b	normal	EGAS00001000968	EGAN00001035890	EGAX00001219159	EGAR00001232724
249	PD3295b	normal	EGAS00001000968	EGAN00001000654	EGAX00001219161	EGAR00001232726
250	PD3412b	normal	EGAS00001000968	EGAN00001088455	EGAX00001219163	EGAR00001232728
252	PD3714b	normal	EGAS00001000968	EGAN00001000500	EGAX00001219165	EGAR00001232730
253	PD3786b	normal	EGAS00001000968	EGAN00001000843	EGAX00001219167	EGAR00001232732
254	PD3789b	normal	EGAS00001000968	EGAN00001029554	EGAX00001219169	EGAR00001232734
255	PD3790b	normal	EGAS00001000968	EGAN00001000844	EGAX00001219171	EGAR00001232736
256	PD3791b	normal	EGAS00001000968	EGAN00001000845	EGAX00001219173	EGAR00001232738
258	PD3793b	normal	EGAS00001000968	EGAN00001000840	EGAX00001219175	EGAR00001232740
260	PD3796b	normal	EGAS00001000968	EGAN00001029556	EGAX00001219177	EGAR00001232742
261	PD3797b	normal	EGAS00001000968	EGAN00001000853	EGAX00001219179	EGAR00001232744
262	PD3799b	normal	EGAS00001000968	EGAN00001226162	EGAX00001219181	EGAR00001232746
264	PD3804b	normal	EGAS00001000968	EGAN00001001048	EGAX00001219183	EGAR00001232748
265	PD3806b	normal	EGAS00001000968	EGAN00001032450	EGAX00001219185	EGAR00001232750
266	PD3807b	normal	EGAS00001000968	EGAN00001032452	EGAX00001219187	EGAR00001232752
267	PD3808b	normal	EGAS00001000968	EGAN00001032454	EGAX00001219189	EGAR00001232754
268	PD3812b	normal	EGAS00001000968	EGAN00001032456	EGAX00001219191	EGAR00001232756
269	PD3814b	normal	EGAS00001000968	EGAN00001032458	EGAX00001219193	EGAR00001232758
270	PD3815b	normal	EGAS00001000968	EGAN00001032460	EGAX00001219195	EGAR00001232760
272	PD3819b	normal	EGAS00001000968	EGAN00001032462	EGAX00001219197	EGAR00001232762
273	PD3820b	normal	EGAS00001000968	EGAN00001001052	EGAX00001219199	EGAR00001232764
274	PD3821b	normal	EGAS00001000968	EGAN00001001054	EGAX00001219201	EGAR00001232766
275	PD3849b	normal	EGAS00001000968	EGAN00001000674	EGAX00001219203	EGAR00001232768
276	PD3851b	normal	EGAS00001000968	EGAN00001000378	EGAX00001219205	EGAR00001232770
277	PD3852b	normal	EGAS00001000968	EGAN00001000675	EGAX00001219207	EGAR00001232772
278	PD3853b	normal	EGAS00001000968	EGAN00001000676	EGAX00001219209	EGAR00001232774
279	PD3854b	normal	EGAS00001000968	EGAN00001000665	EGAX00001219211	EGAR00001232776
280	PD3856b	normal	EGAS00001000968	EGAN00001000666	EGAX00001219213	EGAR00001232778
281	PD3857b	normal	EGAS00001000968	EGAN00001000667	EGAX00001219215	EGAR00001232780
282	PD3858b	normal	EGAS00001000968	EGAN00001000668	EGAX00001219217	EGAR00001232782
283	PD3861b	normal	EGAS00001000968	EGAN00001029557	EGAX00001219219	EGAR00001232784
284	PD3862b	normal	EGAS00001000968	EGAN00001029558	EGAX00001219221	EGAR00001232786
285	PD3890b	normal	EGAS00001000968	EGAN00001226164	EGAX00001219223	EGAR00001232788
286	PD3904b	normal	EGAS00001000968	EGAN00001000380	EGAX00001219225	EGAR00001232790
287	PD3905b	normal	EGAS00001000968	EGAN00001000383	EGAX00001219227	EGAR00001232792
288	PD3916b	normal	EGAS00001000968	EGAN00001001566	EGAX00001219229	EGAR00001232794
289	PD3917b	normal	EGAS00001000968	EGAN00001001568	EGAX00001219231	EGAR00001232796
290	PD3918b	normal	EGAS00001000968	EGAN00001001570	EGAX00001219233	EGAR00001232798
291	PD3945b	normal	EGAS00001000968	EGAN00001030893	EGAX00001219235	EGAR00001232800
292	PD3952b	normal	EGAS00001000968	EGAN00001000962	EGAX00001219237	EGAR00001232802
293	PD3953b	normal	EGAS00001000968	EGAN00001000964	EGAX00001219239	EGAR00001232804
294	PD3954b	normal	EGAS00001000968	EGAN00001000966	EGAX00001219241	EGAR00001232806
295	PD3955b	normal	EGAS00001000968	EGAN00001000968	EGAX00001219243	EGAR00001232808
296	PD3956b	normal	EGAS00001000968	EGAN00001000970	EGAX00001219245	EGAR00001232810
297	PD3957b	normal	EGAS00001000968	EGAN00001000972	EGAX00001219247	EGAR00001232812
298	PD3958b	normal	EGAS00001000968	EGAN00001000974	EGAX00001219249	EGAR00001232814
299	PD3959b	normal	EGAS00001000968	EGAN00001000976	EGAX00001219251	EGAR00001232816
300	PD3960b	normal	EGAS00001000968	EGAN00001000978	EGAX00001219253	EGAR00001232818
301	PD3961b	normal	EGAS00001000968	EGAN00001000980	EGAX00001219255	EGAR00001232820
302	PD3962b	normal	EGAS00001000968	EGAN00001226165	EGAX00001219257	EGAR00001232822
303	PD3963b	normal	EGAS00001000968	EGAN00001226166	EGAX00001219259	EGAR00001232824
304	PD3964b	normal	EGAS00001000968	EGAN00001000983	EGAX00001219261	EGAR00001232826
305	PD3965b	normal	EGAS00001000968	EGAN00001000984	EGAX00001219263	EGAR00001232828
306	PD3966b	normal	EGAS00001000968	EGAN00001000985	EGAX00001219265	EGAR00001232830
307	PD3967b	normal	EGAS00001000968	EGAN00001000986	EGAX00001219267	EGAR00001232832
308	PD3968b	normal	EGAS00001000968	EGAN00001000987	EGAX00001219269	EGAR00001232834
309	PD3969b	normal	EGAS00001000968	EGAN00001000988	EGAX00001219271	EGAR00001232836
310	PD3970b	normal	EGAS00001000968	EGAN00001000989	EGAX00001219273	EGAR00001232838
311	PD3971b	normal	EGAS00001000968	EGAN00001000990	EGAX00001219275	EGAR00001232840
312	PD3972b	normal	EGAS00001000968	EGAN00001000991	EGAX00001219277	EGAR00001232842
313	PD3973b	normal	EGAS00001000968	EGAN00001000992	EGAX00001219279	EGAR00001232844
314	PD3974b	normal	EGAS00001000968	EGAN00001000993	EGAX00001219281	EGAR00001232846
315	PD3975b	normal	EGAS00001000968	EGAN00001000994	EGAX00001219283	EGAR00001232848
316	PD3976b	normal	EGAS00001000968	EGAN00001000995	EGAX00001219285	EGAR00001232850
317	PD3977b	normal	EGAS00001000968	EGAN00001000996	EGAX00001219287	EGAR00001232852
318	PD3978b	normal	EGAS00001000968	EGAN00001000997	EGAX00001219289	EGAR00001232854
319	PD3983b	normal	EGAS00001000968	EGAN00001000691	EGAX00001219291	EGAR00001232856
321	PD3985b	normal	EGAS00001000968	EGAN00001000679	EGAX00001219293	EGAR00001232858
322	PD3986b	normal	EGAS00001000968	EGAN00001000680	EGAX00001219295	EGAR00001232860
323	PD3987b	normal	EGAS00001000968	EGAN00001000681	EGAX00001219297	EGAR00001232862
324	PD3988b	normal	EGAS00001000968	EGAN00001000682	EGAX00001219299	EGAR00001232864
325	PD3989b	normal	EGAS00001000968	EGAN00001083455	EGAX00001219301	EGAR00001232866
326	PD3990b	normal	EGAS00001000968	EGAN00001000684	EGAX00001219303	EGAR00001232868
327	PD3991b	normal	EGAS00001000968	EGAN00001000706	EGAX00001219305	EGAR00001232870
328	PD3992b	normal	EGAS00001000968	EGAN00001000707	EGAX00001219307	EGAR00001232872
329	PD3993b	normal	EGAS00001000968	EGAN00001000694	EGAX00001219309	EGAR00001232874
330	PD3994b	normal	EGAS00001000968	EGAN00001000695	EGAX00001219311	EGAR00001232876
331	PD3995b	normal	EGAS00001000968	EGAN00001000696	EGAX00001219313	EGAR00001232878
332	PD3996b	normal	EGAS00001000968	EGAN00001000697	EGAX00001219315	EGAR00001232880
333	PD3997b	normal	EGAS00001000968	EGAN00001000698	EGAX00001219317	EGAR00001232882
334	PD3998b	normal	EGAS00001000968	EGAN00001000699	EGAX00001219319	EGAR00001232884
335	PD3999b	normal	EGAS00001000968	EGAN00001068019	EGAX00001219321	EGAR00001232886
336	PD4000b	normal	EGAS00001000968	EGAN00001000714	EGAX00001219323	EGAR00001232888
337	PD4001b	normal	EGAS00001000968	EGAN00001000715	EGAX00001219325	EGAR00001232890
339	PD4003b	normal	EGAS00001000968	EGAN00001000717	EGAX00001219327	EGAR00001232892
340	PD4004b	normal	EGAS00001000968	EGAN00001000718	EGAX00001219329	EGAR00001232894
341	PD4005b	normal	EGAS00001000968	EGAN00001226169	EGAX00001219331	EGAR00001232896
342	PD4006b	normal	EGAS00001000968	EGAN00001030928	EGAX00001219333	EGAR00001232898
343	PD4007b	normal	EGAS00001000968	EGAN00001000742	EGAX00001219335	EGAR00001232900
344	PD4008b	normal	EGAS00001000968	EGAN00001001023	EGAX00001219337	EGAR00001232902
345	PD4009b	normal	EGAS00001000968	EGAN00001001024	EGAX00001219339	EGAR00001232904
346	PD4010b	normal	EGAS00001000968	EGAN00001001025	EGAX00001219341	EGAR00001232906
347	PD4011b	normal	EGAS00001000968	EGAN00001001026	EGAX00001219343	EGAR00001232908
348	PD4012b	normal	EGAS00001000968	EGAN00001001027	EGAX00001219345	EGAR00001232910
349	PD4013b	normal	EGAS00001000968	EGAN00001001028	EGAX00001219347	EGAR00001232912
350	PD4014b	normal	EGAS00001000968	EGAN00001001029	EGAX00001219349	EGAR00001232914
351	PD4015b	normal	EGAS00001000968	EGAN00001001030	EGAX00001219351	EGAR00001232916
352	PD4016b	normal	EGAS00001000968	EGAN00001001039	EGAX00001219353	EGAR00001232918
353	PD4017b	normal	EGAS00001000968	EGAN00001001040	EGAX00001219355	EGAR00001232920
354	PD4018b	normal	EGAS00001000968	EGAN00001001041	EGAX00001219357	EGAR00001232922
355	PD4019b	normal	EGAS00001000968	EGAN00001001042	EGAX00001219359	EGAR00001232924
356	PD4020b	normal	EGAS00001000968	EGAN00001013184	EGAX00001219361	EGAR00001232926
357	PD4021b	normal	EGAS00001000968	EGAN00001001044	EGAX00001219363	EGAR00001232928
358	PD4022b	normal	EGAS00001000968	EGAN00001001045	EGAX00001219365	EGAR00001232930
359	PD4023b	normal	EGAS00001000968	EGAN00001001046	EGAX00001219367	EGAR00001232932
360	PD4024b	normal	EGAS00001000968	EGAN00001001179	EGAX00001219369	EGAR00001232934
361	PD4025b	normal	EGAS00001000968	EGAN00001001181	EGAX00001219371	EGAR00001232936
362	PD4026b	normal	EGAS00001000968	EGAN00001001183	EGAX00001219373	EGAR00001232938
363	PD4027b	normal	EGAS00001000968	EGAN00001001185	EGAX00001219375	EGAR00001232940
364	PD4028b	normal	EGAS00001000968	EGAN00001001187	EGAX00001219377	EGAR00001232942
366	PD4030b	normal	EGAS00001000968	EGAN00001001191	EGAX00001219379	EGAR00001232944
367	PD4031b	normal	EGAS00001000968	EGAN00001001193	EGAX00001219381	EGAR00001232946
369	PD4033b	normal	EGAS00001000968	EGAN00001001197	EGAX00001219383	EGAR00001232948
370	PD4034b	normal	EGAS00001000968	EGAN00001001199	EGAX00001219385	EGAR00001232950
371	PD4035b	normal	EGAS00001000968	EGAN00001001201	EGAX00001219387	EGAR00001232952
372	PD4036b	normal	EGAS00001000968	EGAN00001001203	EGAX00001219389	EGAR00001232954
373	PD4037b	normal	EGAS00001000968	EGAN00001001205	EGAX00001219391	EGAR00001232956
374	PD4038b	normal	EGAS00001000968	EGAN00001001207	EGAX00001219393	EGAR00001232958
375	PD4039b	normal	EGAS00001000968	EGAN00001001209	EGAX00001219395	EGAR00001232960
377	PD4060b	normal	EGAS00001000968	EGAN00001013526	EGAX00001219397	EGAR00001232962
378	PD4063b	normal	EGAS00001000968	EGAN00001000800	EGAX00001219399	EGAR00001232964
379	PD4069b	normal	EGAS00001000968	EGAN00001032195	EGAX00001219401	EGAR00001232966
380	PD4070b	normal	EGAS00001000968	EGAN00001036435	EGAX00001219403	EGAR00001232968
381	PD4072b	normal	EGAS00001000968	EGAN00001032169	EGAX00001219405	EGAR00001232970
383	PD4076b	normal	EGAS00001000968	EGAN00001092748	EGAX00001219407	EGAR00001232972
384	PD4080b	normal	EGAS00001000968	EGAN00001032171	EGAX00001219409	EGAR00001232974
385	PD4082b	normal	EGAS00001000968	EGAN00001036441	EGAX00001219411	EGAR00001232976
386	PD4084b	normal	EGAS00001000968	EGAN00001000857	EGAX00001219413	EGAR00001232978
387	PD4085b	normal	EGAS00001000968	EGAN00001000583	EGAX00001219415	EGAR00001232980
388	PD4086b	normal	EGAS00001000968	EGAN00001000746	EGAX00001219417	EGAR00001232982
389	PD4087b	normal	EGAS00001000968	EGAN00001000859	EGAX00001219419	EGAR00001232984
390	PD4088b	normal	EGAS00001000968	EGAN00001000587	EGAX00001219421	EGAR00001232986
400	PD4103b	normal	EGAS00001000968	EGAN00001000595	EGAX00001219423	EGAR00001232988
401	PD4104b	normal	EGAS00001000968	EGAN00001000897	EGAX00001219425	EGAR00001232990
402	PD4105b	normal	EGAS00001000968	EGAN00001000899	EGAX00001219427	EGAR00001232992
403	PD4106b	normal	EGAS00001000968	EGAN00001000901	EGAX00001219429	EGAR00001232994
404	PD4107b	normal	EGAS00001000968	EGAN00001000752	EGAX00001219431	EGAR00001232996
405	PD4108b	normal	EGAS00001000968	EGAN00001000903	EGAX00001219433	EGAR00001232998
406	PD4109b	normal	EGAS00001000968	EGAN00001000750	EGAX00001219435	EGAR00001233000
407	PD4110b	normal	EGAS00001000968	EGAN00001000905	EGAX00001219437	EGAR00001233002
408	PD4111b	normal	EGAS00001000968	EGAN00001000907	EGAX00001219439	EGAR00001233004
409	PD4112b	normal	EGAS00001000968	EGAN00001000909	EGAX00001219441	EGAR00001233006
410	PD4113b	normal	EGAS00001000968	EGAN00001000769	EGAX00001219443	EGAR00001233008
411	PD4115b	normal	EGAS00001000968	EGAN00001000593	EGAX00001219445	EGAR00001233010
412	PD4116b	normal	EGAS00001000968	EGAN00001000597	EGAX00001219447	EGAR00001233012
413	PD4118b	normal	EGAS00001000968	EGAN00001000932	EGAX00001219449	EGAR00001233014
414	PD4119b	normal	EGAS00001000968	EGAN00001000933	EGAX00001219451	EGAR00001233016
415	PD4120b	normal	EGAS00001000968	EGAN00001032320	EGAX00001219453	EGAR00001233018
416	PD4121b	normal	EGAS00001000968	EGAN00001000935	EGAX00001219455	EGAR00001233020
417	PD4122b	normal	EGAS00001000968	EGAN00001000936	EGAX00001219457	EGAR00001233022
418	PD4123b	normal	EGAS00001000968	EGAN00001000937	EGAX00001219459	EGAR00001233024
419	PD4124b	normal	EGAS00001000968	EGAN00001000938	EGAX00001219461	EGAR00001233026
420	PD4125b	normal	EGAS00001000968	EGAN00001000939	EGAX00001219463	EGAR00001233028
421	PD4126b	normal	EGAS00001000968	EGAN00001000940	EGAX00001219465	EGAR00001233030
422	PD4127b	normal	EGAS00001000968	EGAN00001000941	EGAX00001219467	EGAR00001233032
423	PD4128b	normal	EGAS00001000968	EGAN00001000942	EGAX00001219469	EGAR00001233034
424	PD4129b	normal	EGAS00001000968	EGAN00001000943	EGAX00001219471	EGAR00001233036
425	PD4130b	normal	EGAS00001000968	EGAN00001000944	EGAX00001219473	EGAR00001233038
426	PD4131b	normal	EGAS00001000968	EGAN00001000945	EGAX00001219475	EGAR00001233040
427	PD4132b	normal	EGAS00001000968	EGAN00001000946	EGAX00001219477	EGAR00001233042
428	PD4133b	normal	EGAS00001000968	EGAN00001000947	EGAX00001219479	EGAR00001233044
429	PD4134b	normal	EGAS00001000968	EGAN00001000948	EGAX00001219481	EGAR00001233046
430	PD4135b	normal	EGAS00001000968	EGAN00001000949	EGAX00001219483	EGAR00001233048
431	PD4136b	normal	EGAS00001000968	EGAN00001000950	EGAX00001219485	EGAR00001233050
432	PD4137b	normal	EGAS00001000968	EGAN00001000951	EGAX00001219487	EGAR00001233052
433	PD4183b	normal	EGAS00001000968	EGAN00001001056	EGAX00001219489	EGAR00001233054
435	PD4187b	normal	EGAS00001000968	EGAN00001001060	EGAX00001219491	EGAR00001233056
436	PD4188b	normal	EGAS00001000968	EGAN00001001062	EGAX00001219493	EGAR00001233058
437	PD4190b	normal	EGAS00001000968	EGAN00001226173	EGAX00001219495	EGAR00001233060
439	PD4194b	normal	EGAS00001000968	EGAN00001030898	EGAX00001219497	EGAR00001233062
440	PD4195b	normal	EGAS00001000968	EGAN00001036434	EGAX00001219499	EGAR00001233064
441	PD4196b	normal	EGAS00001000968	EGAN00001036436	EGAX00001219501	EGAR00001233066
442	PD4197b	normal	EGAS00001000968	EGAN00001036438	EGAX00001219503	EGAR00001233068
443	PD4198b	normal	EGAS00001000968	EGAN00001030929	EGAX00001219505	EGAR00001233070
444	PD4199b	normal	EGAS00001000968	EGAN00001226174	EGAX00001219507	EGAR00001233072
445	PD4200b	normal	EGAS00001000968	EGAN00001036440	EGAX00001219509	EGAR00001233074
446	PD4201b	normal	EGAS00001000968	EGAN00001036515	EGAX00001219511	EGAR00001233076
447	PD4202b	normal	EGAS00001000968	EGAN00001036516	EGAX00001219513	EGAR00001233078
448	PD4203b	normal	EGAS00001000968	EGAN00001036517	EGAX00001219515	EGAR00001233080
449	PD4204b	normal	EGAS00001000968	EGAN00001036518	EGAX00001219517	EGAR00001233082
450	PD4205b	normal	EGAS00001000968	EGAN00001036519	EGAX00001219519	EGAR00001233084
451	PD4224b	normal	EGAS00001000968	EGAN00001032173	EGAX00001219521	EGAR00001233086
452	PD4225b	normal	EGAS00001000968	EGAN00001032175	EGAX00001219523	EGAR00001233088
453	PD4226b	normal	EGAS00001000968	EGAN00001036477	EGAX00001219525	EGAR00001233090
455	PD4248b	normal	EGAS00001000968	EGAN00001030904	EGAX00001219527	EGAR00001233092
456	PD4252b	normal	EGAS00001000968	EGAN00001226175	EGAX00001219529	EGAR00001233094
457	PD4255b	normal	EGAS00001000968	EGAN00001030785	EGAX00001219531	EGAR00001233096
458	PD4261b	normal	EGAS00001000968	EGAN00001032177	EGAX00001219533	EGAR00001233098
459	PD4264b	normal	EGAS00001000968	EGAN00001036483	EGAX00001219535	EGAR00001233100
460	PD4266b	normal	EGAS00001000968	EGAN00001032179	EGAX00001219537	EGAR00001233102
461	PD4267b	normal	EGAS00001000968	EGAN00001032181	EGAX00001219539	EGAR00001233104
462	PD4269b	normal	EGAS00001000968	EGAN00001001211	EGAX00001219541	EGAR00001233106
463	PD4270b	normal	EGAS00001000968	EGAN00001001213	EGAX00001219543	EGAR00001233108
464	PD4271b	normal	EGAS00001000968	EGAN00001001215	EGAX00001219545	EGAR00001233110
465	PD4272b	normal	EGAS00001000968	EGAN00001001217	EGAX00001219547	EGAR00001233112
467	PD4274b	normal	EGAS00001000968	EGAN00001001221	EGAX00001219549	EGAR00001233114
468	PD4275b	normal	EGAS00001000968	EGAN00001001223	EGAX00001219551	EGAR00001233116
469	PD4276b	normal	EGAS00001000968	EGAN00001001225	EGAX00001219553	EGAR00001233118
470	PD4277b	normal	EGAS00001000968	EGAN00001001227	EGAX00001219555	EGAR00001233120
471	PD4278b	normal	EGAS00001000968	EGAN00001001229	EGAX00001219557	EGAR00001233122
472	PD4279b	normal	EGAS00001000968	EGAN00001001231	EGAX00001219559	EGAR00001233124
473	PD4280b	normal	EGAS00001000968	EGAN00001001233	EGAX00001219561	EGAR00001233126
474	PD4281b	normal	EGAS00001000968	EGAN00001001235	EGAX00001219563	EGAR00001233128
475	PD4283b	normal	EGAS00001000968	EGAN00001001144	EGAX00001219565	EGAR00001233130
476	PD4284b	normal	EGAS00001000968	EGAN00001001146	EGAX00001219566	EGAR00001233131
477	PD4285b	normal	EGAS00001000968	EGAN00001001148	EGAX00001219569	EGAR00001233134
478	PD4286b	normal	EGAS00001000968	EGAN00001001150	EGAX00001219571	EGAR00001233136
479	PD4288b	normal	EGAS00001000968	EGAN00001001152	EGAX00001219573	EGAR00001233138
480	PD4289b	normal	EGAS00001000968	EGAN00001001154	EGAX00001219575	EGAR00001233140
481	PD4290b	normal	EGAS00001000968	EGAN00001001156	EGAX00001219577	EGAR00001233142
482	PD4291b	normal	EGAS00001000968	EGAN00001001158	EGAX00001219579	EGAR00001233144
483	PD4292b	normal	EGAS00001000968	EGAN00001001160	EGAX00001219580	EGAR00001233145
484	PD4293b	normal	EGAS00001000968	EGAN00001001162	EGAX00001219583	EGAR00001233148
485	PD4294b	normal	EGAS00001000968	EGAN00001001164	EGAX00001219585	EGAR00001233150
486	PD4295b	normal	EGAS00001000968	EGAN00001001166	EGAX00001219587	EGAR00001233152
487	PD4296b	normal	EGAS00001000968	EGAN00001001168	EGAX00001219589	EGAR00001233154
488	PD4299b	normal	EGAS00001000968	EGAN00001001172	EGAX00001219591	EGAR00001233156
489	PD4300b	normal	EGAS00001000968	EGAN00001001174	EGAX00001219593	EGAR00001233158
490	PD4301b	normal	EGAS00001000968	EGAN00001001176	EGAX00001219595	EGAR00001233160
491	PD4302b	normal	EGAS00001000968	EGAN00001012338	EGAX00001219597	EGAR00001233162
492	PD4303b	normal	EGAS00001000968	EGAN00001010200	EGAX00001219599	EGAR00001233164
493	PD4315b	normal	EGAS00001000968	EGAN00001032197	EGAX00001219601	EGAR00001233166
495	PD4594b	normal	EGAS00001000968	EGAN00001036481	EGAX00001219603	EGAR00001233168
496	PD4595b	normal	EGAS00001000968	EGAN00001036528	EGAX00001219605	EGAR00001233170
497	PD4596b	normal	EGAS00001000968	EGAN00001036530	EGAX00001219607	EGAR00001233172
498	PD4599b	normal	EGAS00001000968	EGAN00001036532	EGAX00001219609	EGAR00001233174
499	PD4600b	normal	EGAS00001000968	EGAN00001036534	EGAX00001219611	EGAR00001233176
500	PD4601b	normal	EGAS00001000968	EGAN00001036536	EGAX00001219613	EGAR00001233178
501	PD4602b	normal	EGAS00001000968	EGAN00001036538	EGAX00001219615	EGAR00001233180
502	PD4603b	normal	EGAS00001000968	EGAN00001036540	EGAX00001219617	EGAR00001233182
503	PD4604b	normal	EGAS00001000968	EGAN00001032199	EGAX00001219619	EGAR00001233184
504	PD4605b	normal	EGAS00001000968	EGAN00001032201	EGAX00001219621	EGAR00001233186
505	PD4606b	normal	EGAS00001000968	EGAN00001032203	EGAX00001219623	EGAR00001233188
506	PD4607b	normal	EGAS00001000968	EGAN00001032205	EGAX00001219625	EGAR00001233190
507	PD4608b	normal	EGAS00001000968	EGAN00001032207	EGAX00001219627	EGAR00001233192
508	PD4613b	normal	EGAS00001000968	EGAN00001032209	EGAX00001219629	EGAR00001233194
509	PD4727b	normal	EGAS00001000968	EGAN00001226177	EGAX00001219631	EGAR00001233196
510	PD4728b	normal	EGAS00001000968	EGAN00001226179	EGAX00001219633	EGAR00001233198
511	PD4771b	normal	EGAS00001000968	EGAN00001001353	EGAX00001219635	EGAR00001233200
512	PD4772b	normal	EGAS00001000968	EGAN00001001429	EGAX00001219637	EGAR00001233202
513	PD4773b	normal	EGAS00001000968	EGAN00001001406	EGAX00001219639	EGAR00001233204
514	PD4775b2	normal	EGAS00001000968	EGAN00001073566	EGAX00001219641	EGAR00001233206
515	PD4776b	normal	EGAS00001000968	EGAN00001001431	EGAX00001219643	EGAR00001233208
517	PD4778b	normal	EGAS00001000968	EGAN00001001410	EGAX00001219645	EGAR00001233210
518	PD4779b	normal	EGAS00001000968	EGAN00001001439	EGAX00001219647	EGAR00001233212
519	PD4780b	normal	EGAS00001000968	EGAN00001001436	EGAX00001219649	EGAR00001233214
520	PD4781b	normal	EGAS00001000968	EGAN00001001433	EGAX00001219651	EGAR00001233216
521	PD4802b	normal	EGAS00001000968	EGAN00001001423	EGAX00001219653	EGAR00001233218
522	PD4808b	normal	EGAS00001000968	EGAN00001001425	EGAX00001219655	EGAR00001233220
523	PD4809b	normal	EGAS00001000968	EGAN00001001427	EGAX00001219657	EGAR00001233222
524	PD4820b	normal	EGAS00001000968	EGAN00001226181	EGAX00001219659	EGAR00001233224
525	PD4826b	normal	EGAS00001000968	EGAN00001030789	EGAX00001219661	EGAR00001233226
526	PD4833b	normal	EGAS00001000968	EGAN00001030791	EGAX00001219663	EGAR00001233228
527	PD4836b	normal	EGAS00001000968	EGAN00001030793	EGAX00001219665	EGAR00001233230
528	PD4841b	normal	EGAS00001000968	EGAN00001030795	EGAX00001219667	EGAR00001233232
529	PD4842b	normal	EGAS00001000968	EGAN00001036523	EGAX00001219669	EGAR00001233234
530	PD4843b	normal	EGAS00001000968	EGAN00001036524	EGAX00001219671	EGAR00001233236
531	PD4844b	normal	EGAS00001000968	EGAN00001036525	EGAX00001219673	EGAR00001233238
532	PD4845b	normal	EGAS00001000968	EGAN00001030829	EGAX00001219675	EGAR00001233240
533	PD4846b	normal	EGAS00001000968	EGAN00001036526	EGAX00001219677	EGAR00001233242
534	PD4847b2	normal	EGAS00001000968	EGAN00001030831	EGAX00001219679	EGAR00001233244
535	PD4848a	normal	EGAS00001000968	EGAN00001001308	EGAX00001219680	EGAR00001233245
536	PD4849a	normal	EGAS00001000968	EGAN00001001305	EGAX00001219682	EGAR00001233247
538	PD4851a	normal	EGAS00001000968	EGAN00001001301	EGAX00001219684	EGAR00001233249
540	PD4853a	normal	EGAS00001000968	EGAN00001001307	EGAX00001219686	EGAR00001233251
541	PD4854a	normal	EGAS00001000968	EGAN00001001309	EGAX00001219688	EGAR00001233253
542	PD4855a	normal	EGAS00001000968	EGAN00001001304	EGAX00001219690	EGAR00001233255
544	PD4857a	normal	EGAS00001000968	EGAN00001001317	EGAX00001219692	EGAR00001233257
546	PD4859a	normal	EGAS00001000968	EGAN00001001306	EGAX00001219694	EGAR00001233259
547	PD4860a	normal	EGAS00001000968	EGAN00001001295	EGAX00001219696	EGAR00001233261
548	PD4861a	normal	EGAS00001000968	EGAN00001001299	EGAX00001219698	EGAR00001233263
549	PD4862a	normal	EGAS00001000968	EGAN00001001297	EGAX00001219700	EGAR00001233265
550	PD4863a	normal	EGAS00001000968	EGAN00001001296	EGAX00001219702	EGAR00001233267
551	PD4864a	normal	EGAS00001000968	EGAN00001001303	EGAX00001219704	EGAR00001233269
553	PD4866a	normal	EGAS00001000968	EGAN00001001300	EGAX00001219706	EGAR00001233271
554	PD4867a	normal	EGAS00001000968	EGAN00001001302	EGAX00001219708	EGAR00001233273
558	PD4871a	normal	EGAS00001000968	EGAN00001001298	EGAX00001219710	EGAR00001233275
559	PD4872b	normal	EGAS00001000968	EGAN00001032183	EGAX00001219713	EGAR00001233278
560	PD4873b	normal	EGAS00001000968	EGAN00001032185	EGAX00001219715	EGAR00001233280
561	PD4874b	normal	EGAS00001000968	EGAN00001030781	EGAX00001219717	EGAR00001233282
562	PD4875b	normal	EGAS00001000968	EGAN00001030783	EGAX00001219719	EGAR00001233284
563	PD4876b	normal	EGAS00001000968	EGAN00001032187	EGAX00001219721	EGAR00001233286
565	PD4884b	normal	EGAS00001000968	EGAN00001226184	EGAX00001219723	EGAR00001233288
566	PD4885b	normal	EGAS00001000968	EGAN00001226186	EGAX00001219725	EGAR00001233290
567	PD4886b	normal	EGAS00001000968	EGAN00001226188	EGAX00001219727	EGAR00001233292
568	PD4887b	normal	EGAS00001000968	EGAN00001226190	EGAX00001219729	EGAR00001233294
569	PD4888b	normal	EGAS00001000968	EGAN00001226192	EGAX00001219731	EGAR00001233296
570	PD4889b	normal	EGAS00001000968	EGAN00001226194	EGAX00001219733	EGAR00001233298
571	PD4890b	normal	EGAS00001000968	EGAN00001226196	EGAX00001219735	EGAR00001233300
572	PD4891b	normal	EGAS00001000968	EGAN00001226198	EGAX00001219737	EGAR00001233302
573	PD4892b	normal	EGAS00001000968	EGAN00001226200	EGAX00001219739	EGAR00001233304
574	PD4893b	normal	EGAS00001000968	EGAN00001226202	EGAX00001219741	EGAR00001233306
575	PD4894b	normal	EGAS00001000968	EGAN00001226204	EGAX00001219743	EGAR00001233308
576	PD4895b	normal	EGAS00001000968	EGAN00001226206	EGAX00001219745	EGAR00001233310
577	PD4896b	normal	EGAS00001000968	EGAN00001226208	EGAX00001219747	EGAR00001233312
578	PD4897b	normal	EGAS00001000968	EGAN00001226210	EGAX00001219749	EGAR00001233314
579	PD4898b	normal	EGAS00001000968	EGAN00001226212	EGAX00001219751	EGAR00001233316
580	PD4900b	normal	EGAS00001000968	EGAN00001226214	EGAX00001219753	EGAR00001233318
581	PD4901b	normal	EGAS00001000968	EGAN00001226216	EGAX00001219755	EGAR00001233320
582	PD4902b	normal	EGAS00001000968	EGAN00001226218	EGAX00001219757	EGAR00001233322
583	PD4903b	normal	EGAS00001000968	EGAN00001226220	EGAX00001219759	EGAR00001233324
584	PD4904b	normal	EGAS00001000968	EGAN00001226222	EGAX00001219761	EGAR00001233326
585	PD4905b	normal	EGAS00001000968	EGAN00001226224	EGAX00001219763	EGAR00001233328
586	PD4906b	normal	EGAS00001000968	EGAN00001226226	EGAX00001219765	EGAR00001233330
587	PD4907b	normal	EGAS00001000968	EGAN00001226228	EGAX00001219767	EGAR00001233332
588	PD4908b	normal	EGAS00001000968	EGAN00001226230	EGAX00001219769	EGAR00001233334
589	PD4909b	normal	EGAS00001000968	EGAN00001226232	EGAX00001219771	EGAR00001233336
590	PD4910b	normal	EGAS00001000968	EGAN00001226234	EGAX00001219773	EGAR00001233338
591	PD4911b	normal	EGAS00001000968	EGAN00001226236	EGAX00001219775	EGAR00001233340
592	PD4912b	normal	EGAS00001000968	EGAN00001226238	EGAX00001219777	EGAR00001233342
593	PD4913b	normal	EGAS00001000968	EGAN00001226240	EGAX00001219779	EGAR00001233344
594	PD4914b	normal	EGAS00001000968	EGAN00001226242	EGAX00001219781	EGAR00001233346
595	PD4915b	normal	EGAS00001000968	EGAN00001226244	EGAX00001219783	EGAR00001233348
597	PD4917b	normal	EGAS00001000968	EGAN00001226246	EGAX00001219785	EGAR00001233350
598	PD4918b	normal	EGAS00001000968	EGAN00001226248	EGAX00001219787	EGAR00001233352
599	PD4919b	normal	EGAS00001000968	EGAN00001226250	EGAX00001219789	EGAR00001233354
600	PD4920b	normal	EGAS00001000968	EGAN00001226252	EGAX00001219791	EGAR00001233356
601	PD4921b	normal	EGAS00001000968	EGAN00001226254	EGAX00001219793	EGAR00001233358
602	PD4922b	normal	EGAS00001000968	EGAN00001226256	EGAX00001219795	EGAR00001233360
603	PD4923b	normal	EGAS00001000968	EGAN00001226258	EGAX00001219797	EGAR00001233362
604	PD4924b	normal	EGAS00001000968	EGAN00001226260	EGAX00001219799	EGAR00001233364
605	PD4925b	normal	EGAS00001000968	EGAN00001226262	EGAX00001219801	EGAR00001233366
606	PD4926b	normal	EGAS00001000968	EGAN00001032291	EGAX00001219803	EGAR00001233368
607	PD4927b	normal	EGAS00001000968	EGAN00001032293	EGAX00001219805	EGAR00001233370
608	PD4928b	normal	EGAS00001000968	EGAN00001032295	EGAX00001219807	EGAR00001233372
609	PD4929b	normal	EGAS00001000968	EGAN00001032297	EGAX00001219809	EGAR00001233374
610	PD4930b	normal	EGAS00001000968	EGAN00001226264	EGAX00001219811	EGAR00001233376
611	PD4931b	normal	EGAS00001000968	EGAN00001226266	EGAX00001219813	EGAR00001233378
612	PD4932b	normal	EGAS00001000968	EGAN00001226268	EGAX00001219815	EGAR00001233380
613	PD4933b	normal	EGAS00001000968	EGAN00001226270	EGAX00001219817	EGAR00001233382
614	PD4934b	normal	EGAS00001000968	EGAN00001036509	EGAX00001219819	EGAR00001233384
615	PD4935b	normal	EGAS00001000968	EGAN00001036510	EGAX00001219821	EGAR00001233386
616	PD4936b	normal	EGAS00001000968	EGAN00001036511	EGAX00001219823	EGAR00001233388
617	PD4937b	normal	EGAS00001000968	EGAN00001036512	EGAX00001219825	EGAR00001233390
618	PD4938b	normal	EGAS00001000968	EGAN00001036513	EGAX00001219827	EGAR00001233392
619	PD4939b	normal	EGAS00001000968	EGAN00001036514	EGAX00001219829	EGAR00001233394
620	PD4940b	normal	EGAS00001000968	EGAN00001013524	EGAX00001219831	EGAR00001233396
621	PD4941b	normal	EGAS00001000968	EGAN00001001445	EGAX00001219833	EGAR00001233398
622	PD4942b	normal	EGAS00001000968	EGAN00001013525	EGAX00001219835	EGAR00001233400
623	PD4943b	normal	EGAS00001000968	EGAN00001001447	EGAX00001219837	EGAR00001233402
624	PD4944b	normal	EGAS00001000968	EGAN00001001448	EGAX00001219839	EGAR00001233404
625	PD4947b2	normal	EGAS00001000968	EGAN00001077217	EGAX00001219841	EGAR00001233406
626	PD4951b	normal	EGAS00001000968	EGAN00001032305	EGAX00001219843	EGAR00001233408
627	PD4952b	normal	EGAS00001000968	EGAN00001032307	EGAX00001219845	EGAR00001233410
628	PD4953b	normal	EGAS00001000968	EGAN00001032309	EGAX00001219847	EGAR00001233412
629	PD4954b	normal	EGAS00001000968	EGAN00001032311	EGAX00001219849	EGAR00001233414
630	PD4955b	normal	EGAS00001000968	EGAN00001032313	EGAX00001219851	EGAR00001233416
631	PD4956b	normal	EGAS00001000968	EGAN00001030787	EGAX00001219853	EGAR00001233418
632	PD4957b	normal	EGAS00001000968	EGAN00001032315	EGAX00001219855	EGAR00001233420
633	PD4958b	normal	EGAS00001000968	EGAN00001032317	EGAX00001219857	EGAR00001233422
634	PD4959b	normal	EGAS00001000968	EGAN00001032340	EGAX00001219859	EGAR00001233424
635	PD4962b	normal	EGAS00001000968	EGAN00001032342	EGAX00001219861	EGAR00001233426
636	PD4963b	normal	EGAS00001000968	EGAN00001032344	EGAX00001219863	EGAR00001233428
637	PD4965b	normal	EGAS00001000968	EGAN00001032346	EGAX00001219865	EGAR00001233430
638	PD4966b	normal	EGAS00001000968	EGAN00001032348	EGAX00001219867	EGAR00001233432
639	PD4967b	normal	EGAS00001000968	EGAN00001032350	EGAX00001219869	EGAR00001233434
640	PD4968b	normal	EGAS00001000968	EGAN00001032352	EGAX00001219871	EGAR00001233436
641	PD4969b	normal	EGAS00001000968	EGAN00001036485	EGAX00001219873	EGAR00001233438
642	PD4970b	normal	EGAS00001000968	EGAN00001032354	EGAX00001219875	EGAR00001233440
643	PD4971b	normal	EGAS00001000968	EGAN00001032322	EGAX00001219877	EGAR00001233442
644	PD4972b	normal	EGAS00001000968	EGAN00001032324	EGAX00001219879	EGAR00001233444
645	PD4975b	normal	EGAS00001000968	EGAN00001030797	EGAX00001219881	EGAR00001233446
646	PD4976b	normal	EGAS00001000968	EGAN00001032328	EGAX00001219883	EGAR00001233448
647	PD4977b	normal	EGAS00001000968	EGAN00001030799	EGAX00001219885	EGAR00001233450
648	PD4978b	normal	EGAS00001000968	EGAN00001032356	EGAX00001219887	EGAR00001233452
649	PD4979b	normal	EGAS00001000968	EGAN00001030801	EGAX00001219889	EGAR00001233454
650	PD4980b	normal	EGAS00001000968	EGAN00001030803	EGAX00001219891	EGAR00001233456
651	PD4981b	normal	EGAS00001000968	EGAN00001032330	EGAX00001219893	EGAR00001233458
652	PD4982b	normal	EGAS00001000968	EGAN00001032332	EGAX00001219895	EGAR00001233460
653	PD4983b	normal	EGAS00001000968	EGAN00001032334	EGAX00001219897	EGAR00001233462
654	PD4985b	normal	EGAS00001000968	EGAN00001032336	EGAX00001219899	EGAR00001233464
655	PD4986b	normal	EGAS00001000968	EGAN00001032338	EGAX00001219901	EGAR00001233466
656	PD4990b2	normal	EGAS00001000968	EGAN00001072449	EGAX00001219903	EGAR00001233468
657	PD4994b2	normal	EGAS00001000968	EGAN00001072442	EGAX00001219905	EGAR00001233470
658	PD4996b2	normal	EGAS00001000968	EGAN00001072435	EGAX00001219907	EGAR00001233472
659	PD5003b2	normal	EGAS00001000968	EGAN00001072456	EGAX00001219909	EGAR00001233474
660	PD5004b2	normal	EGAS00001000968	EGAN00001072436	EGAX00001219911	EGAR00001233476
661	PD5005b2	normal	EGAS00001000968	EGAN00001072439	EGAX00001219913	EGAR00001233478
662	PD5008b2	normal	EGAS00001000968	EGAN00001072433	EGAX00001219915	EGAR00001233480
663	PD5010b	normal	EGAS00001000968	EGAN00001031004	EGAX00001219917	EGAR00001233482
664	PD5014b2	normal	EGAS00001000968	EGAN00001072441	EGAX00001219919	EGAR00001233484
665	PD5027b2	normal	EGAS00001000968	EGAN00001072437	EGAX00001219921	EGAR00001233486
666	PD5029b2	normal	EGAS00001000968	EGAN00001072448	EGAX00001219923	EGAR00001233488
667	PD5111b	normal	EGAS00001000968	EGAN00001001451	EGAX00001219925	EGAR00001233490
668	PD5115b	normal	EGAS00001000968	EGAN00001030972	EGAX00001219927	EGAR00001233492
670	PD5120b	normal	EGAS00001000968	EGAN00001001450	EGAX00001219929	EGAR00001233494
671	PD5122b	normal	EGAS00001000968	EGAN00001001449	EGAX00001219931	EGAR00001233496
672	PD5125b	normal	EGAS00001000968	EGAN00001035826	EGAX00001219933	EGAR00001233498
673	PD5151b	normal	EGAS00001000968	EGAN00001030975	EGAX00001219935	EGAR00001233500
674	PD5175b	normal	EGAS00001000968	EGAN00001030976	EGAX00001219937	EGAR00001233502
675	PD5847b	normal	EGAS00001000968	EGAN00001001452	EGAX00001219939	EGAR00001233504
676	PD5848b	normal	EGAS00001000968	EGAN00001001453	EGAX00001219941	EGAR00001233506
677	PD5849b	normal	EGAS00001000968	EGAN00001001651	EGAX00001219943	EGAR00001233508
678	PD5850b	normal	EGAS00001000968	EGAN00001001652	EGAX00001219945	EGAR00001233510
679	PD5851b	normal	EGAS00001000968	EGAN00001001653	EGAX00001219947	EGAR00001233512
680	PD5852b	normal	EGAS00001000968	EGAN00001001654	EGAX00001219949	EGAR00001233514
681	PD5853b	normal	EGAS00001000968	EGAN00001001655	EGAX00001219951	EGAR00001233516
684	PD5856b	normal	EGAS00001000968	EGAN00001001658	EGAX00001219953	EGAR00001233518
685	PD5857b	normal	EGAS00001000968	EGAN00001001659	EGAX00001219955	EGAR00001233520
686	PD5858b	normal	EGAS00001000968	EGAN00001001660	EGAX00001219957	EGAR00001233522
687	PD5859b	normal	EGAS00001000968	EGAN00001001661	EGAX00001219959	EGAR00001233524
688	PD5860b	normal	EGAS00001000968	EGAN00001001662	EGAX00001219961	EGAR00001233526
689	PD5861b	normal	EGAS00001000968	EGAN00001001663	EGAX00001219963	EGAR00001233528
690	PD5862b	normal	EGAS00001000968	EGAN00001001664	EGAX00001219965	EGAR00001233530
691	PD5863b	normal	EGAS00001000968	EGAN00001001665	EGAX00001219967	EGAR00001233532
692	PD5864b	normal	EGAS00001000968	EGAN00001001666	EGAX00001219969	EGAR00001233534
693	PD5865b	normal	EGAS00001000968	EGAN00001001667	EGAX00001219971	EGAR00001233536
694	PD5866b	normal	EGAS00001000968	EGAN00001001668	EGAX00001219973	EGAR00001233538
695	PD5867b	normal	EGAS00001000968	EGAN00001001669	EGAX00001219975	EGAR00001233540
696	PD5868b	normal	EGAS00001000968	EGAN00001001670	EGAX00001219977	EGAR00001233542
697	PD5869b	normal	EGAS00001000968	EGAN00001001671	EGAX00001219979	EGAR00001233544
698	PD5870b	normal	EGAS00001000968	EGAN00001001672	EGAX00001219981	EGAR00001233546
699	PD5871b	normal	EGAS00001000968	EGAN00001001673	EGAX00001219983	EGAR00001233548
700	PD5872b	normal	EGAS00001000968	EGAN00001001674	EGAX00001219985	EGAR00001233550
701	PD5873b	normal	EGAS00001000968	EGAN00001001675	EGAX00001219987	EGAR00001233552
703	PD5875b	normal	EGAS00001000968	EGAN00001001719	EGAX00001219989	EGAR00001233554
704	PD5876b	normal	EGAS00001000968	EGAN00001001721	EGAX00001219991	EGAR00001233556
705	PD5877b	normal	EGAS00001000968	EGAN00001001723	EGAX00001219993	EGAR00001233558
706	PD5878b	normal	EGAS00001000968	EGAN00001001725	EGAX00001219995	EGAR00001233560
707	PD5879b	normal	EGAS00001000968	EGAN00001001727	EGAX00001219997	EGAR00001233562
708	PD5880b	normal	EGAS00001000968	EGAN00001001729	EGAX00001219999	EGAR00001233564
709	PD5881b	normal	EGAS00001000968	EGAN00001001731	EGAX00001220001	EGAR00001233566
710	PD5882b	normal	EGAS00001000968	EGAN00001001733	EGAX00001220003	EGAR00001233568
711	PD5883b	normal	EGAS00001000968	EGAN00001001735	EGAX00001220005	EGAR00001233570
712	PD5884b	normal	EGAS00001000968	EGAN00001001737	EGAX00001220007	EGAR00001233572
713	PD5885b	normal	EGAS00001000968	EGAN00001001739	EGAX00001220009	EGAR00001233574
714	PD5886b	normal	EGAS00001000968	EGAN00001001741	EGAX00001220011	EGAR00001233576
715	PD5887b	normal	EGAS00001000968	EGAN00001001743	EGAX00001220013	EGAR00001233578
716	PD5888b	normal	EGAS00001000968	EGAN00001001745	EGAX00001220015	EGAR00001233580
717	PD5889b	normal	EGAS00001000968	EGAN00001001747	EGAX00001220017	EGAR00001233582
718	PD5890b	normal	EGAS00001000968	EGAN00001001749	EGAX00001220019	EGAR00001233584
719	PD5891b	normal	EGAS00001000968	EGAN00001001751	EGAX00001220021	EGAR00001233586
720	PD5892b	normal	EGAS00001000968	EGAN00001001753	EGAX00001220023	EGAR00001233588
721	PD5893b	normal	EGAS00001000968	EGAN00001001755	EGAX00001220025	EGAR00001233590
722	PD5894b	normal	EGAS00001000968	EGAN00001001757	EGAX00001220027	EGAR00001233592
723	PD5895b	normal	EGAS00001000968	EGAN00001001759	EGAX00001220029	EGAR00001233594
724	PD5896b	normal	EGAS00001000968	EGAN00001001761	EGAX00001220031	EGAR00001233596
725	PD5897b	normal	EGAS00001000968	EGAN00001001763	EGAX00001220033	EGAR00001233598
726	PD5898b	normal	EGAS00001000968	EGAN00001001765	EGAX00001220035	EGAR00001233600
728	PD5900b	normal	EGAS00001000968	EGAN00001001769	EGAX00001220037	EGAR00001233602
729	PD5901b	normal	EGAS00001000968	EGAN00001001771	EGAX00001220039	EGAR00001233604
730	PD5902b	normal	EGAS00001000968	EGAN00001001603	EGAX00001220041	EGAR00001233606
731	PD5903b	normal	EGAS00001000968	EGAN00001001605	EGAX00001220043	EGAR00001233608
732	PD5904b	normal	EGAS00001000968	EGAN00001001607	EGAX00001220045	EGAR00001233610
733	PD5905b	normal	EGAS00001000968	EGAN00001001609	EGAX00001220047	EGAR00001233612
734	PD5906b	normal	EGAS00001000968	EGAN00001001611	EGAX00001220049	EGAR00001233614
735	PD5907b	normal	EGAS00001000968	EGAN00001001613	EGAX00001220051	EGAR00001233616
736	PD5908b	normal	EGAS00001000968	EGAN00001001615	EGAX00001220053	EGAR00001233618
737	PD5909b	normal	EGAS00001000968	EGAN00001001617	EGAX00001220055	EGAR00001233620
738	PD5911b	normal	EGAS00001000968	EGAN00001001621	EGAX00001220057	EGAR00001233622
739	PD5915b	normal	EGAS00001000968	EGAN00001226275	EGAX00001220059	EGAR00001233624
740	PD5916b	normal	EGAS00001000968	EGAN00001226277	EGAX00001220061	EGAR00001233626
742	PD5918b	normal	EGAS00001000968	EGAN00001226279	EGAX00001220063	EGAR00001233628
743	PD5919b	normal	EGAS00001000968	EGAN00001226281	EGAX00001220065	EGAR00001233630
744	PD5920b	normal	EGAS00001000968	EGAN00001226283	EGAX00001220067	EGAR00001233632
745	PD5921b	normal	EGAS00001000968	EGAN00001226285	EGAX00001220069	EGAR00001233634
746	PD5922b	normal	EGAS00001000968	EGAN00001226287	EGAX00001220071	EGAR00001233636
748	PD5924b	normal	EGAS00001000968	EGAN00001226289	EGAX00001220073	EGAR00001233638
749	PD5925b	normal	EGAS00001000968	EGAN00001030809	EGAX00001220075	EGAR00001233640
750	PD5928b	normal	EGAS00001000968	EGAN00001032370	EGAX00001220077	EGAR00001233642
751	PD5930b	normal	EGAS00001000968	EGAN00001030813	EGAX00001220079	EGAR00001233644
753	PD5934b	normal	EGAS00001000968	EGAN00001030835	EGAX00001220081	EGAR00001233646
754	PD5935b	normal	EGAS00001000968	EGAN00001030837	EGAX00001220083	EGAR00001233648
755	PD5936b	normal	EGAS00001000968	EGAN00001032509	EGAX00001220085	EGAR00001233650
756	PD5937b	normal	EGAS00001000968	EGAN00001087693	EGAX00001220087	EGAR00001233652
757	PD5938b	normal	EGAS00001000968	EGAN00001087694	EGAX00001220089	EGAR00001233654
758	PD5942b	normal	EGAS00001000968	EGAN00001030815	EGAX00001220091	EGAR00001233656
759	PD5944b	normal	EGAS00001000968	EGAN00001030839	EGAX00001220093	EGAR00001233658
760	PD5945b	normal	EGAS00001000968	EGAN00001030817	EGAX00001220095	EGAR00001233660
761	PD5946b	normal	EGAS00001000968	EGAN00001087695	EGAX00001220097	EGAR00001233662
762	PD5947b	normal	EGAS00001000968	EGAN00001032372	EGAX00001220099	EGAR00001233664
763	PD5948b	normal	EGAS00001000968	EGAN00001030819	EGAX00001220101	EGAR00001233666
764	PD5950b	normal	EGAS00001000968	EGAN00001030841	EGAX00001220103	EGAR00001233668
765	PD5951b	normal	EGAS00001000968	EGAN00001042391	EGAX00001220105	EGAR00001233670
766	PD5953b	normal	EGAS00001000968	EGAN00001087696	EGAX00001220107	EGAR00001233672
767	PD5954b	normal	EGAS00001000968	EGAN00001087697	EGAX00001220109	EGAR00001233674
768	PD5956b	normal	EGAS00001000968	EGAN00001042392	EGAX00001220111	EGAR00001233676
769	PD5959b	normal	EGAS00001000968	EGAN00001087698	EGAX00001220113	EGAR00001233678
770	PD5960b	normal	EGAS00001000968	EGAN00001087699	EGAX00001220115	EGAR00001233680
771	PD5961b	normal	EGAS00001000968	EGAN00001042393	EGAX00001220117	EGAR00001233682
772	PD5964b	normal	EGAS00001000968	EGAN00001087700	EGAX00001220119	EGAR00001233684
773	PD6016b	normal	EGAS00001000968	EGAN00001097160	EGAX00001220121	EGAR00001233686
774	PD6018b	normal	EGAS00001000968	EGAN00001030811	EGAX00001220123	EGAR00001233688
775	PD6022b	normal	EGAS00001000968	EGAN00001226291	EGAX00001220125	EGAR00001233690
776	PD6023b	normal	EGAS00001000968	EGAN00001226293	EGAX00001220127	EGAR00001233692
[truncated: 670 more rows]
