# Supplementary figures and images for: Origins and functional consequences of somatic mitochondrial DNA mutations in human cancer
Source: eLife journal article supplement (doi:10.7554/elife.02935), 2014-09-30

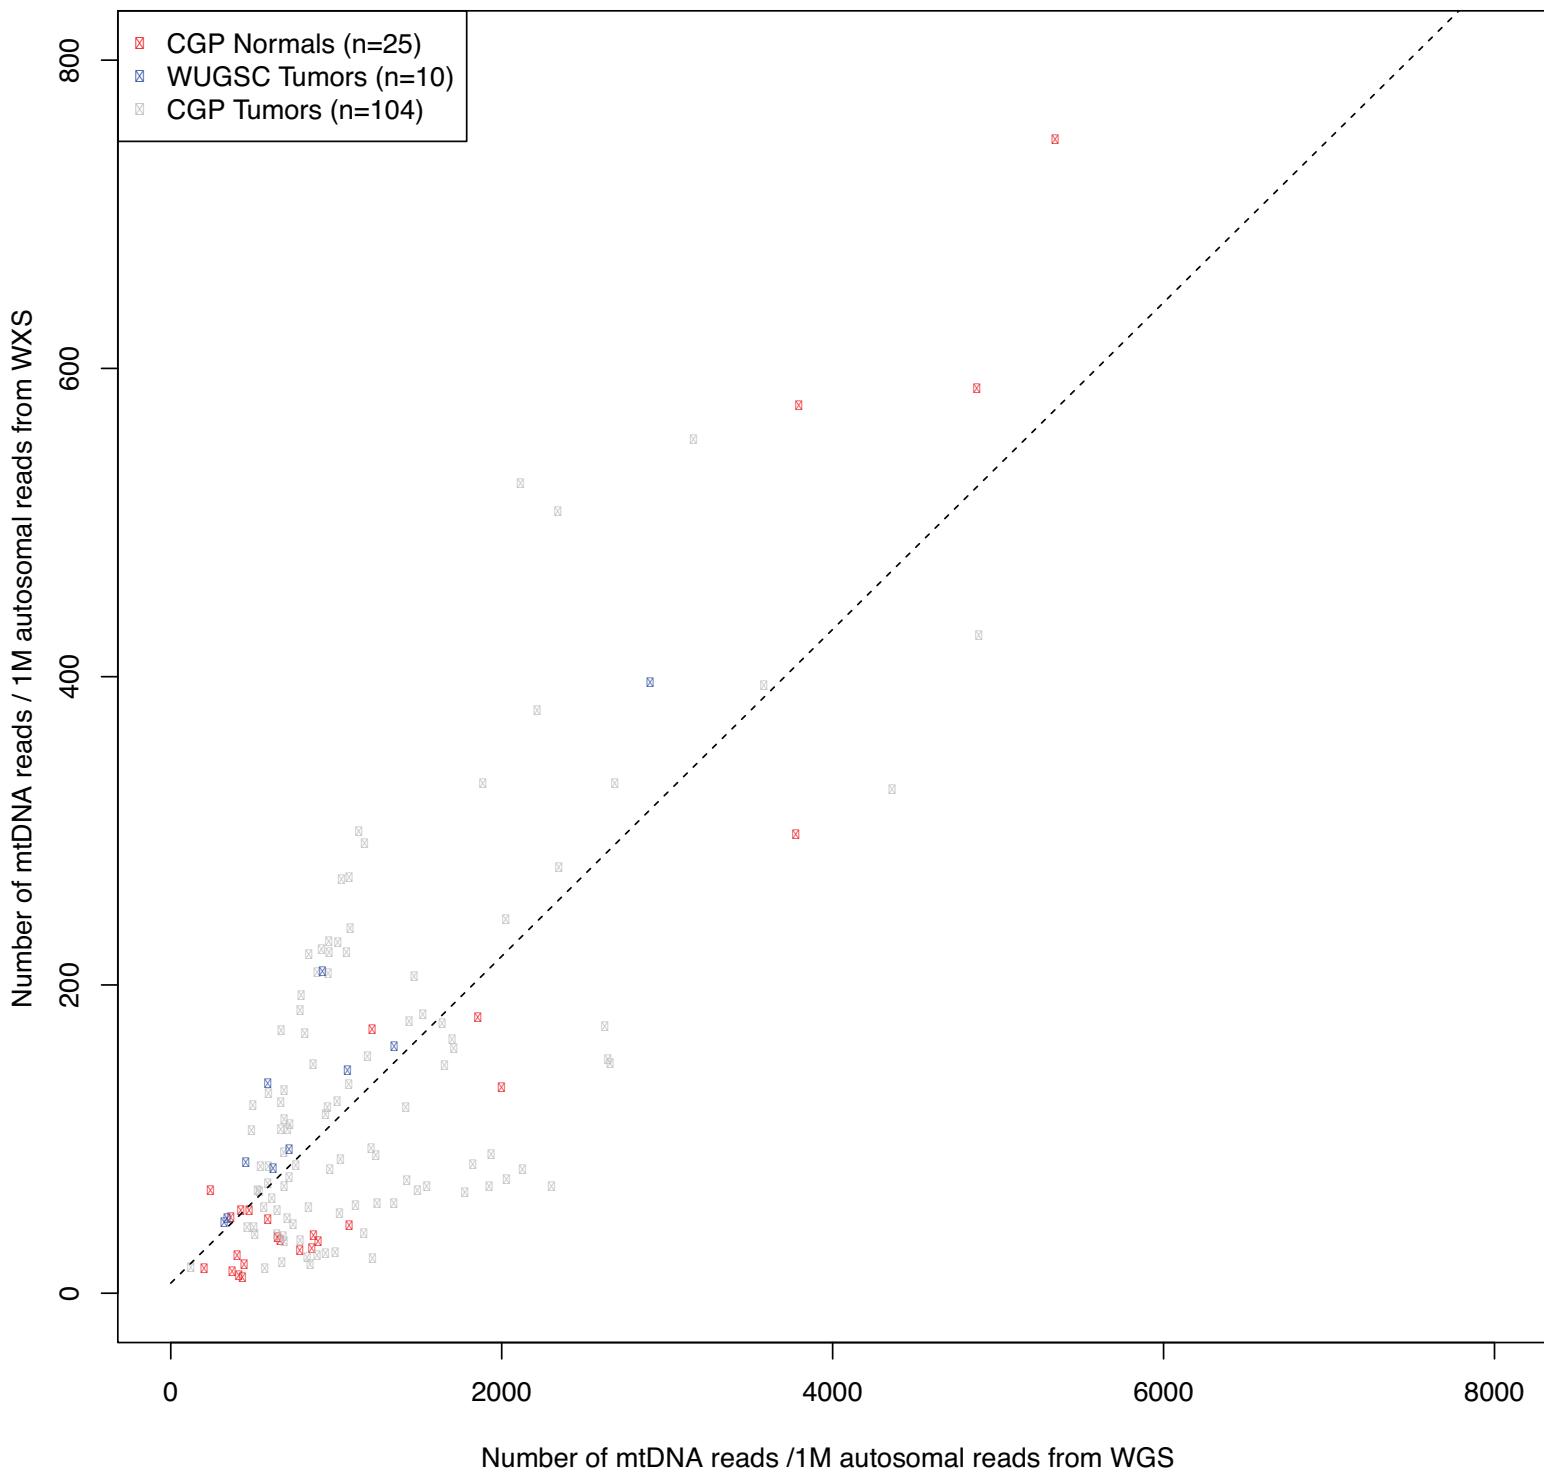

Supplement: supp [file elife-02935-supp-v1.zip]

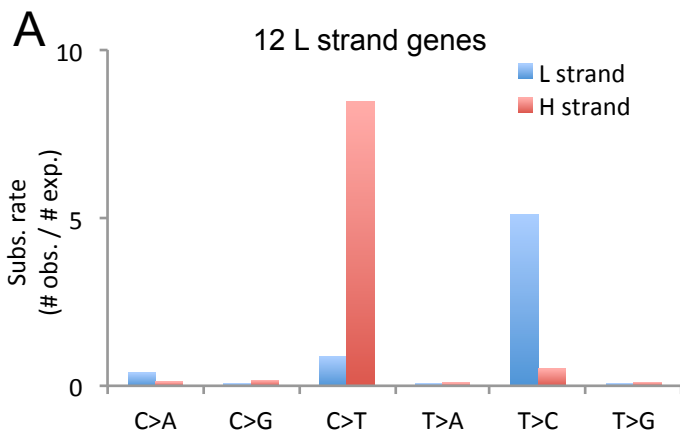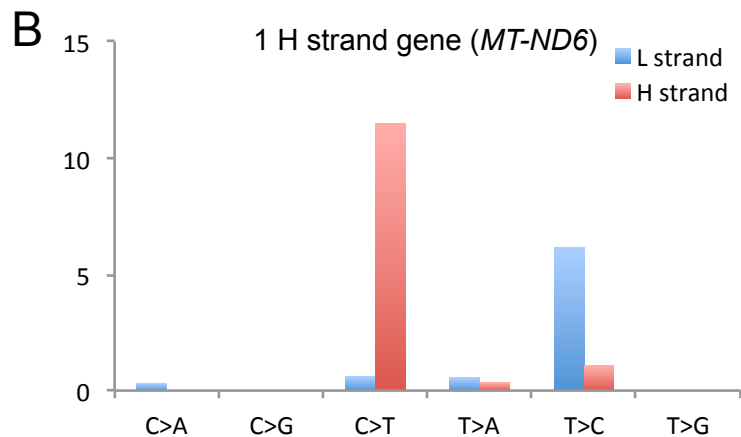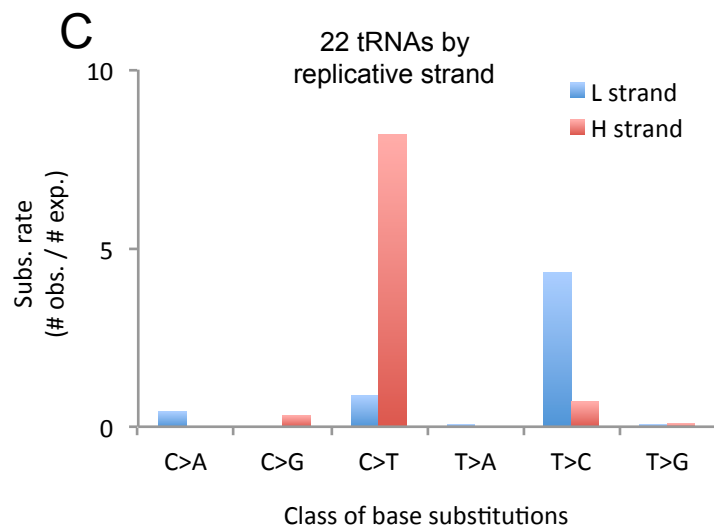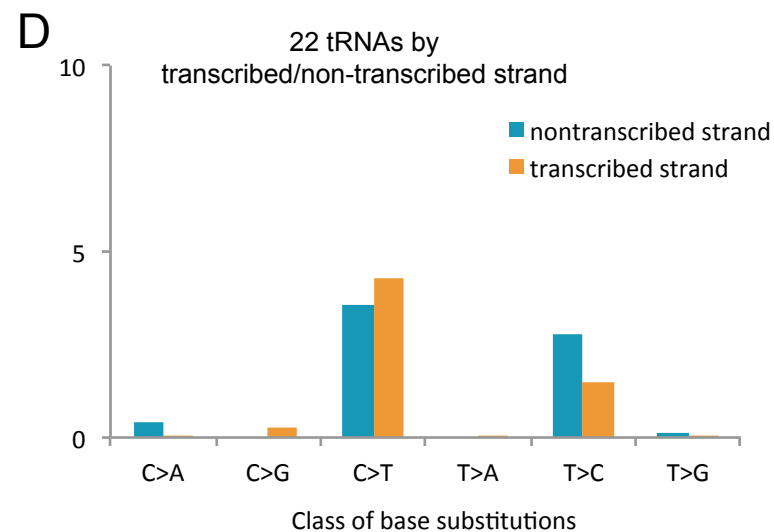

Supplement: supp [file elife-02935-supp-v1.zip]

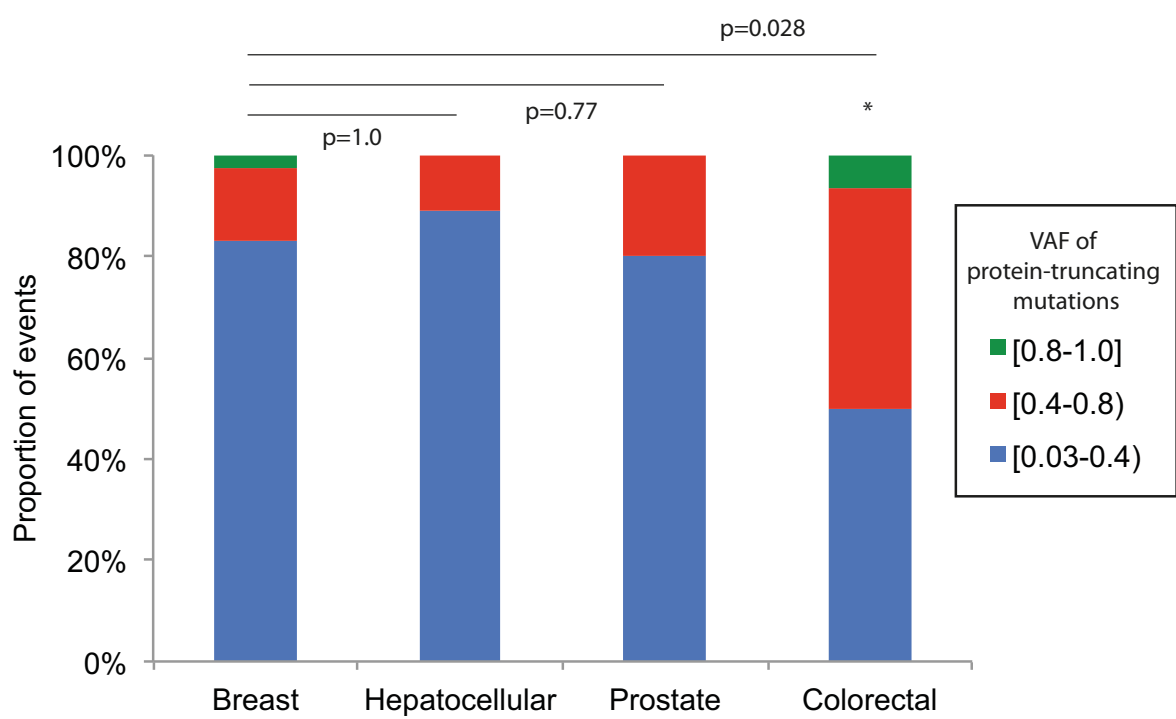

Supplement: supp [file elife-02935-supp-v1.zip]

### off-target mtDNA reads in exome sequences

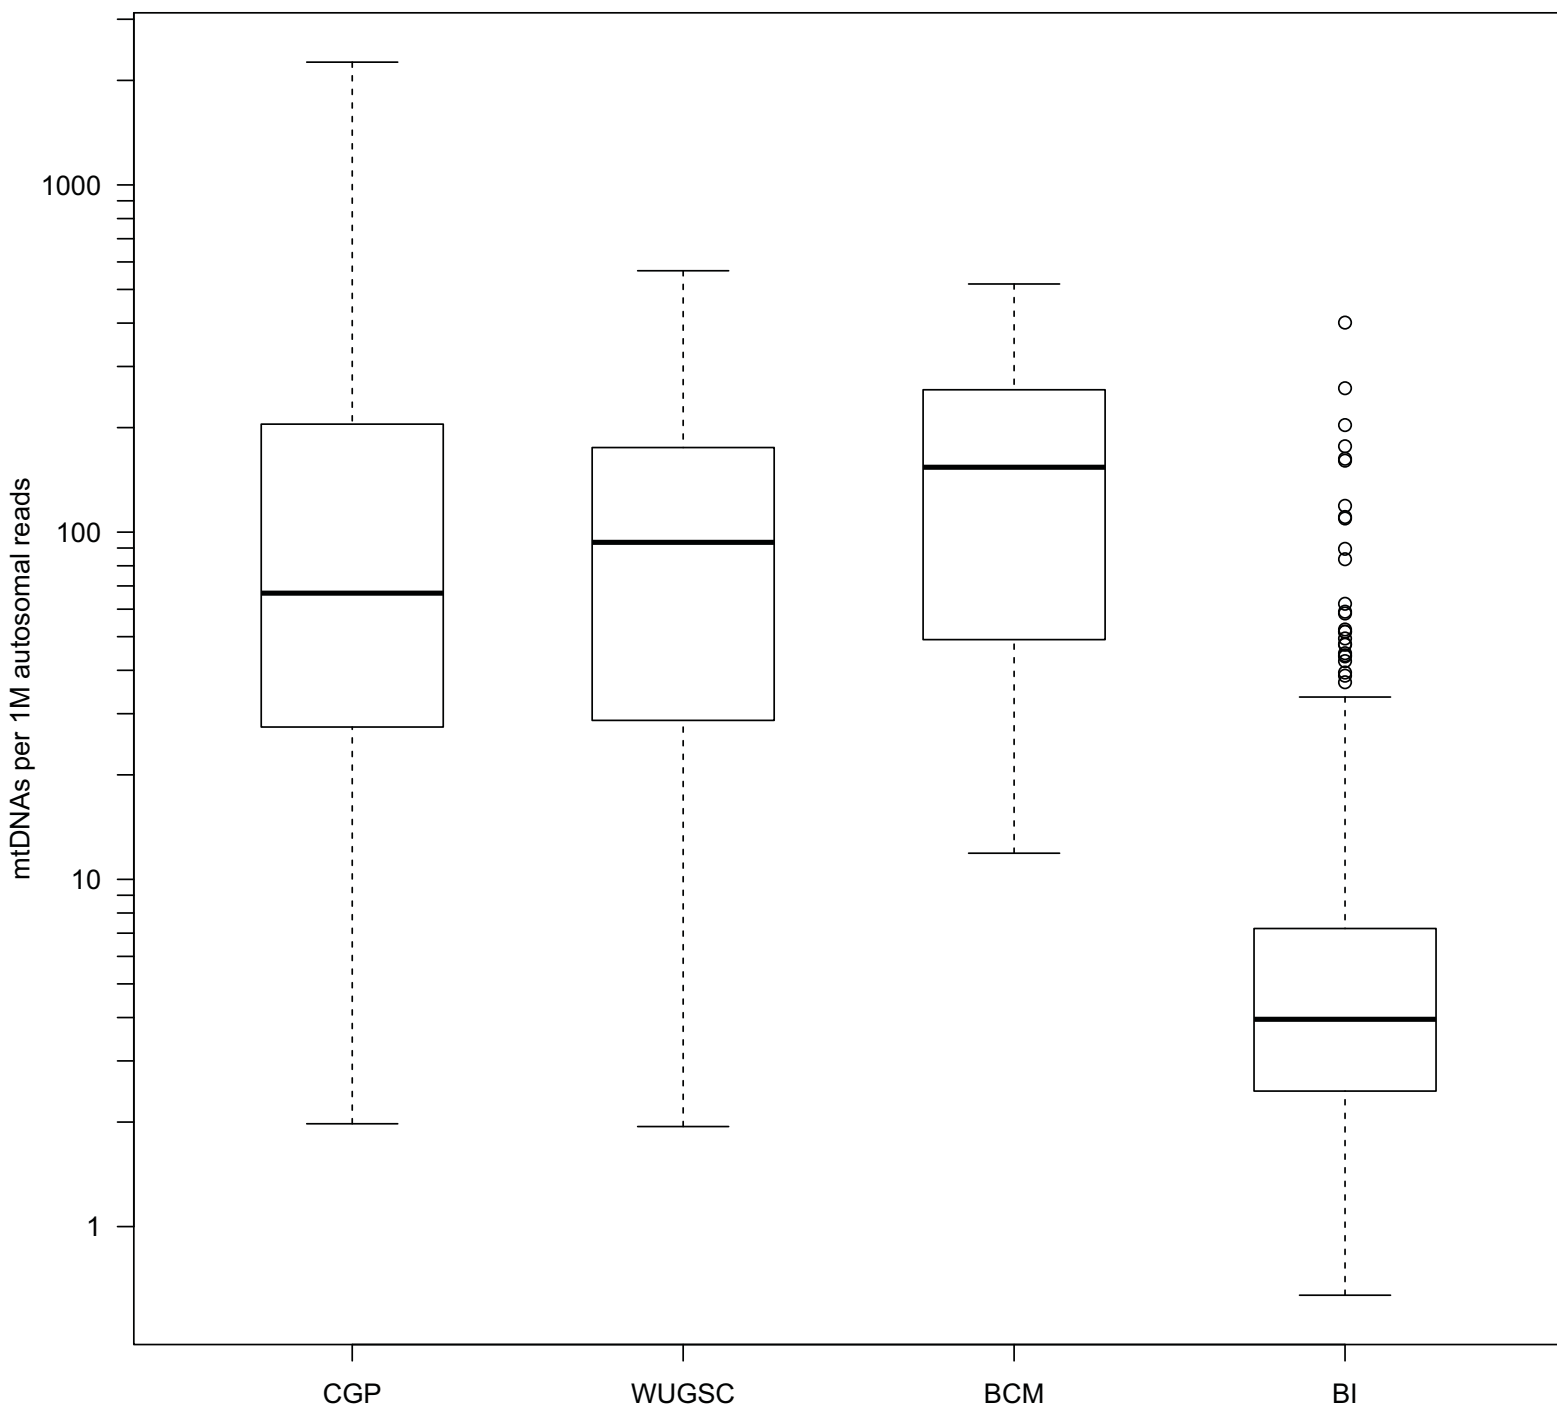

Supplement: supp [file elife-02935-supp-v1.zip]

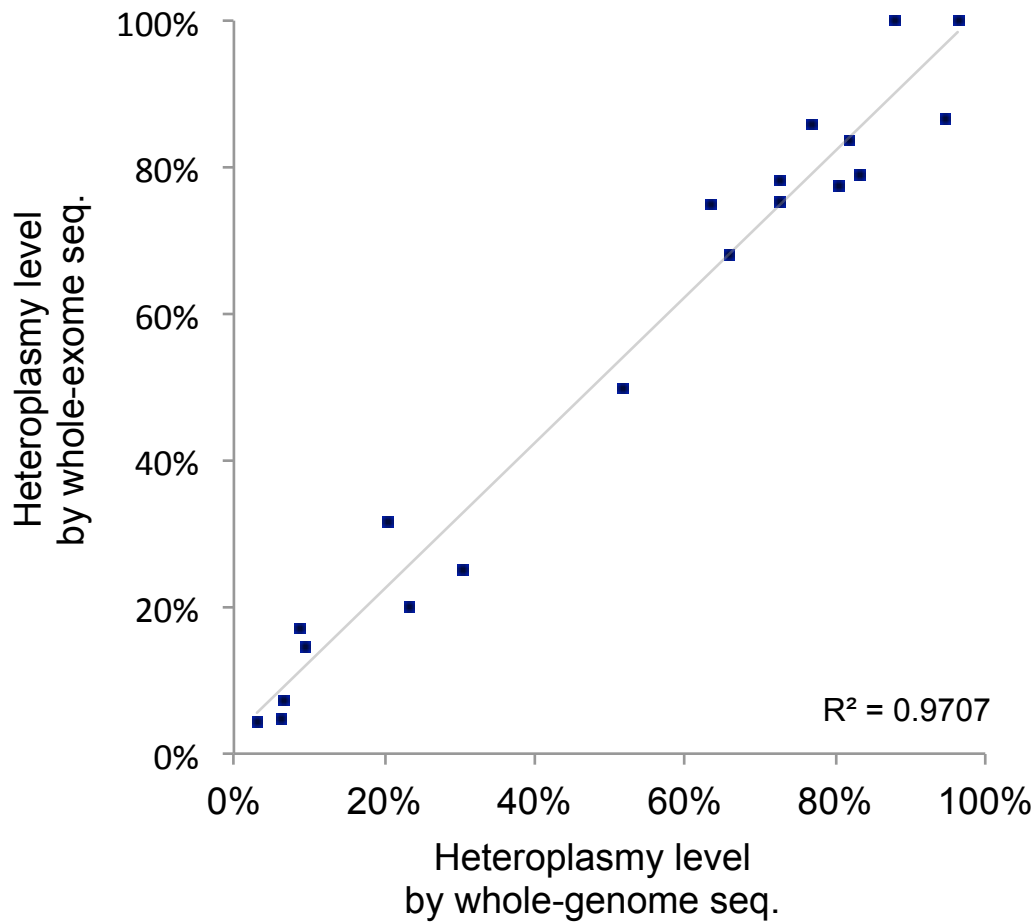

Supplement: supp [file elife-02935-supp-v1.zip]

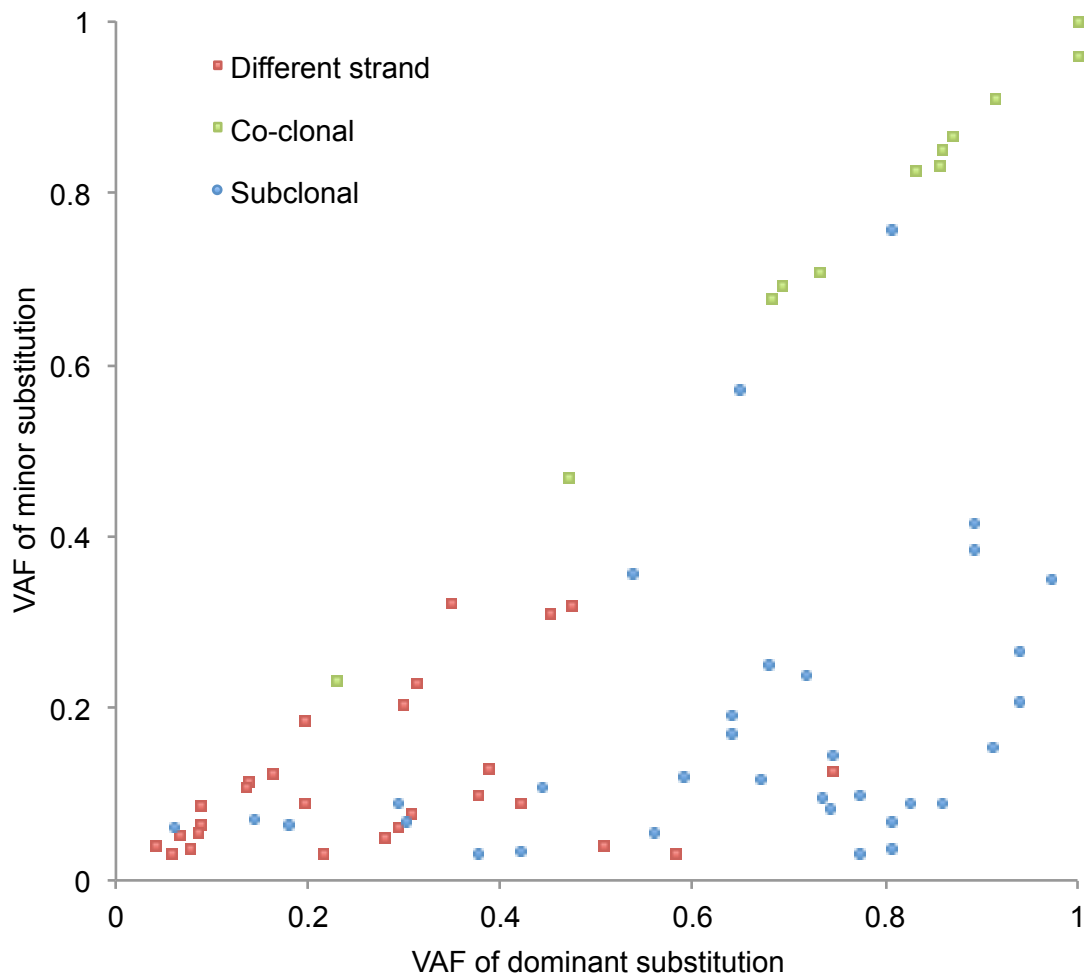

Supplement: supp [file elife-02935-supp-v1.zip]

A

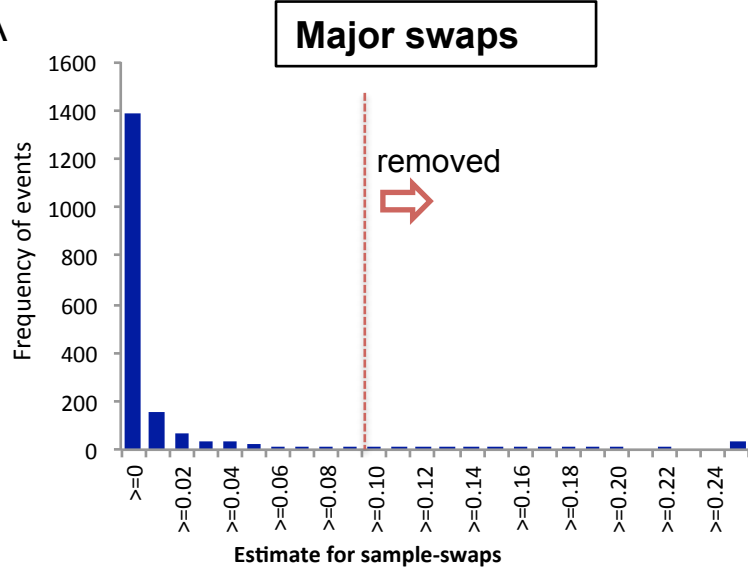

B

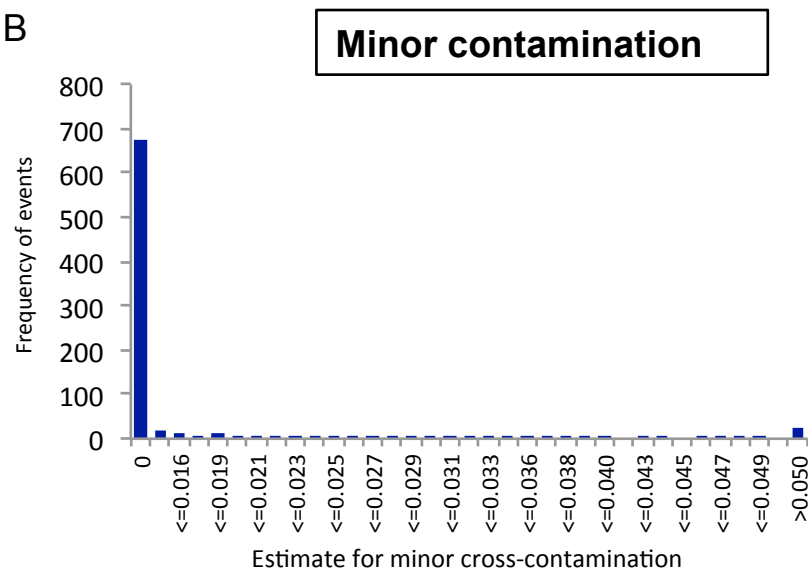

C

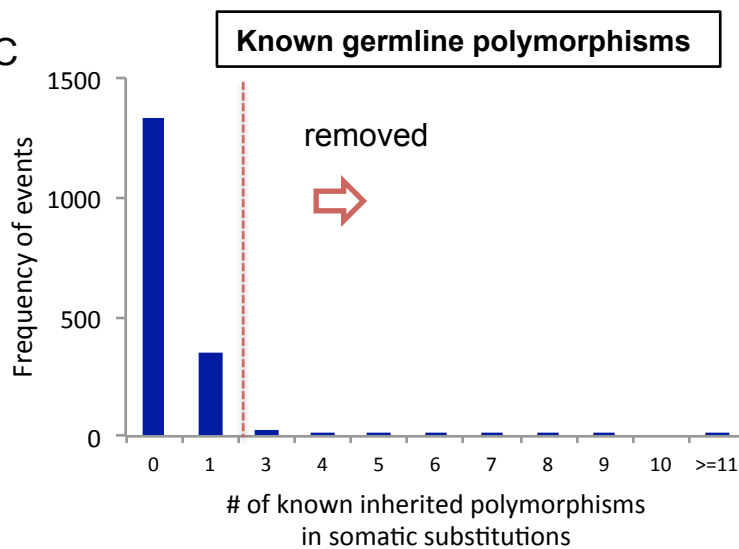

D

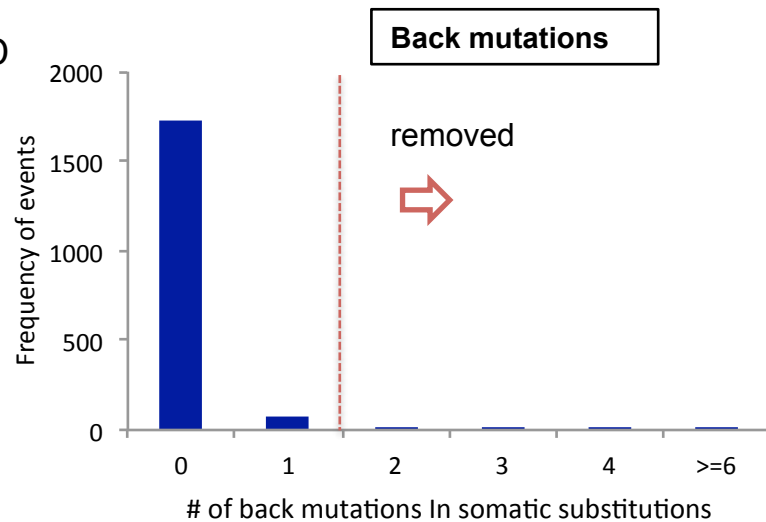

Supplement: supp [file elife-02935-supp-v1.zip]

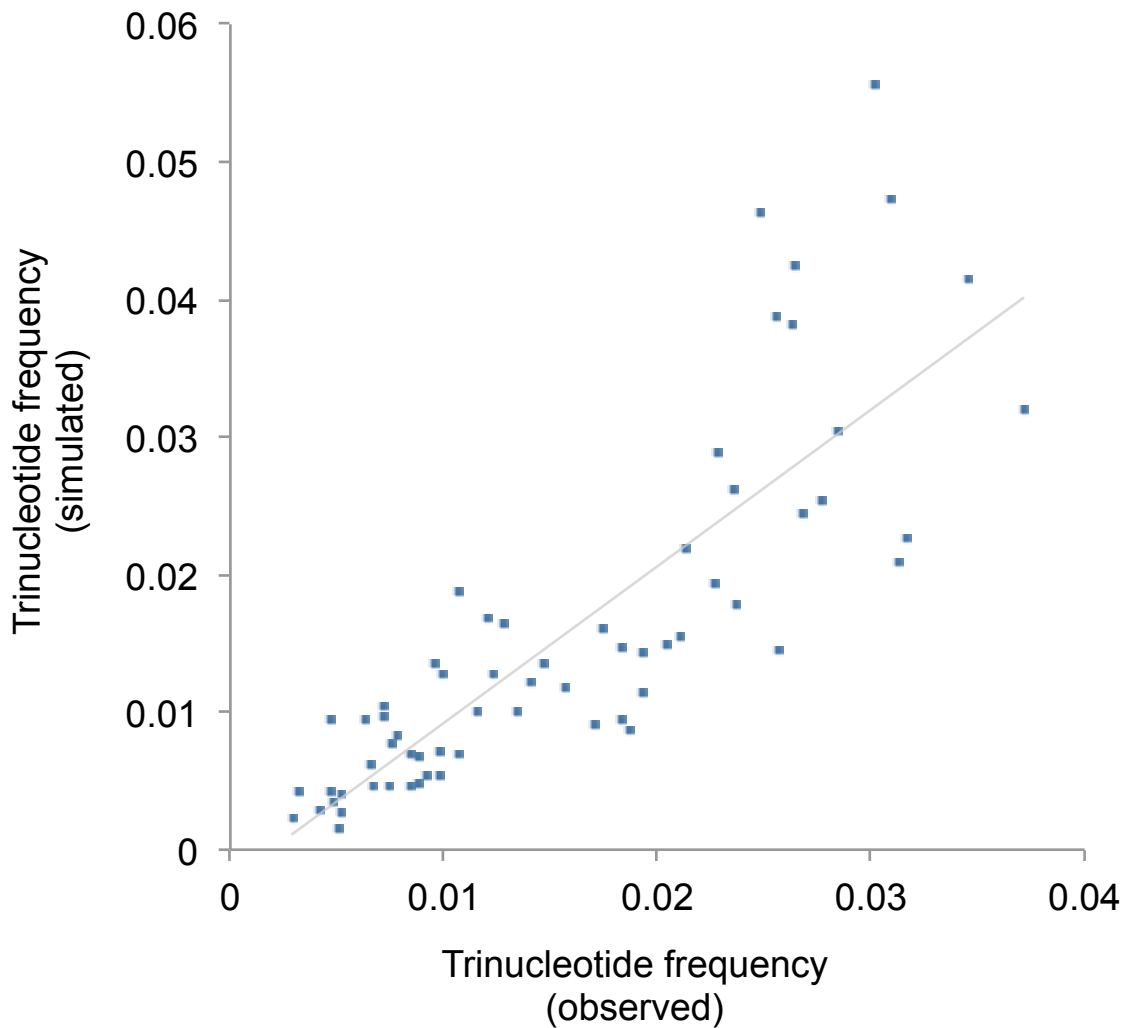

Supplement: supp [file elife-02935-supp-v1.zip]

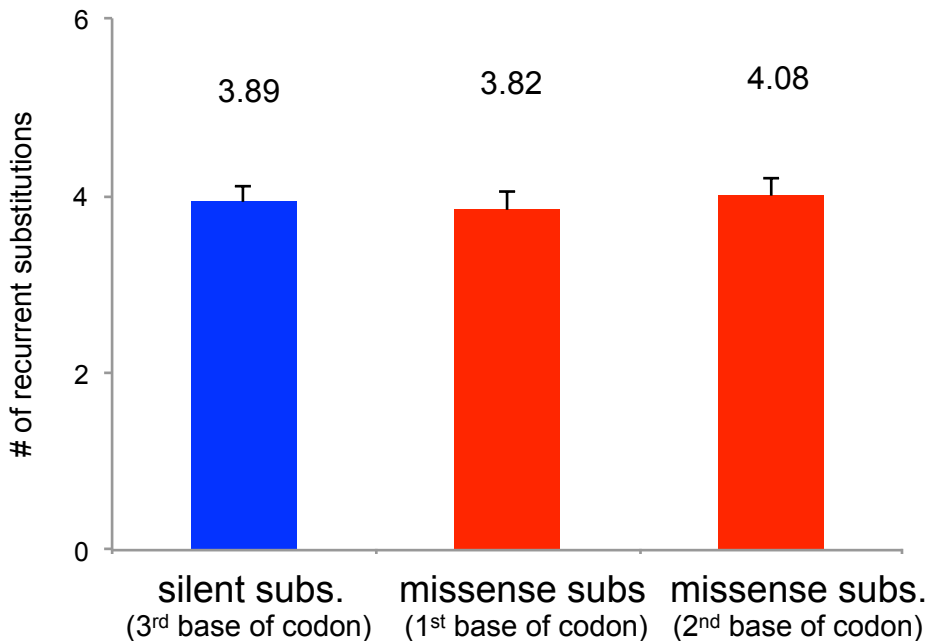

Supplement: supp [file elife-02935-supp-v1.zip]

UV impact in melanomas

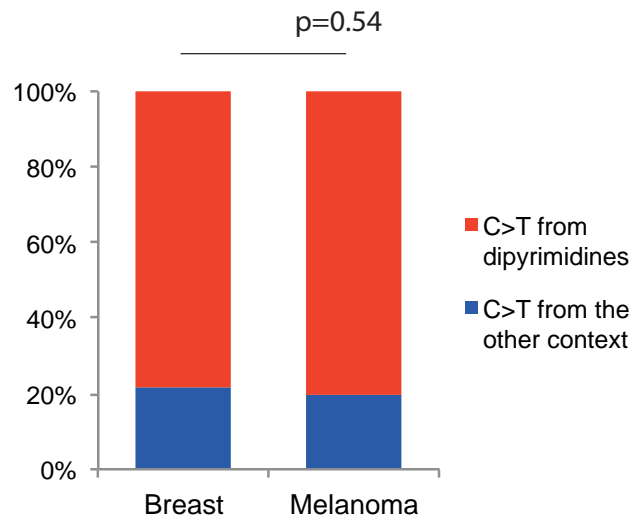

Tobacco impact in lung cancers

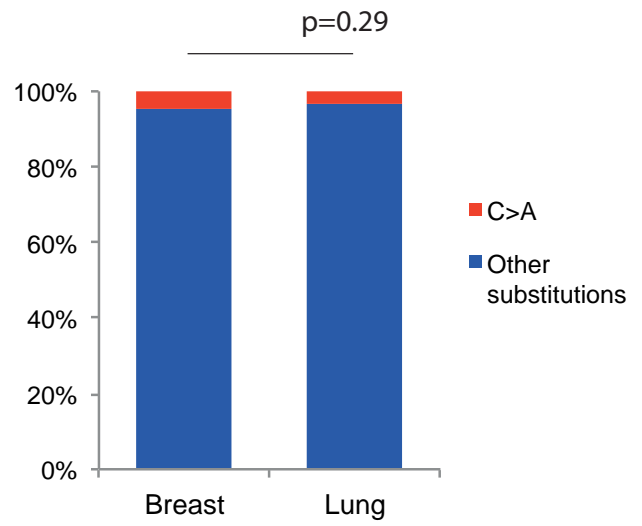

Supplement: supp [file elife-02935-supp-v1.zip]

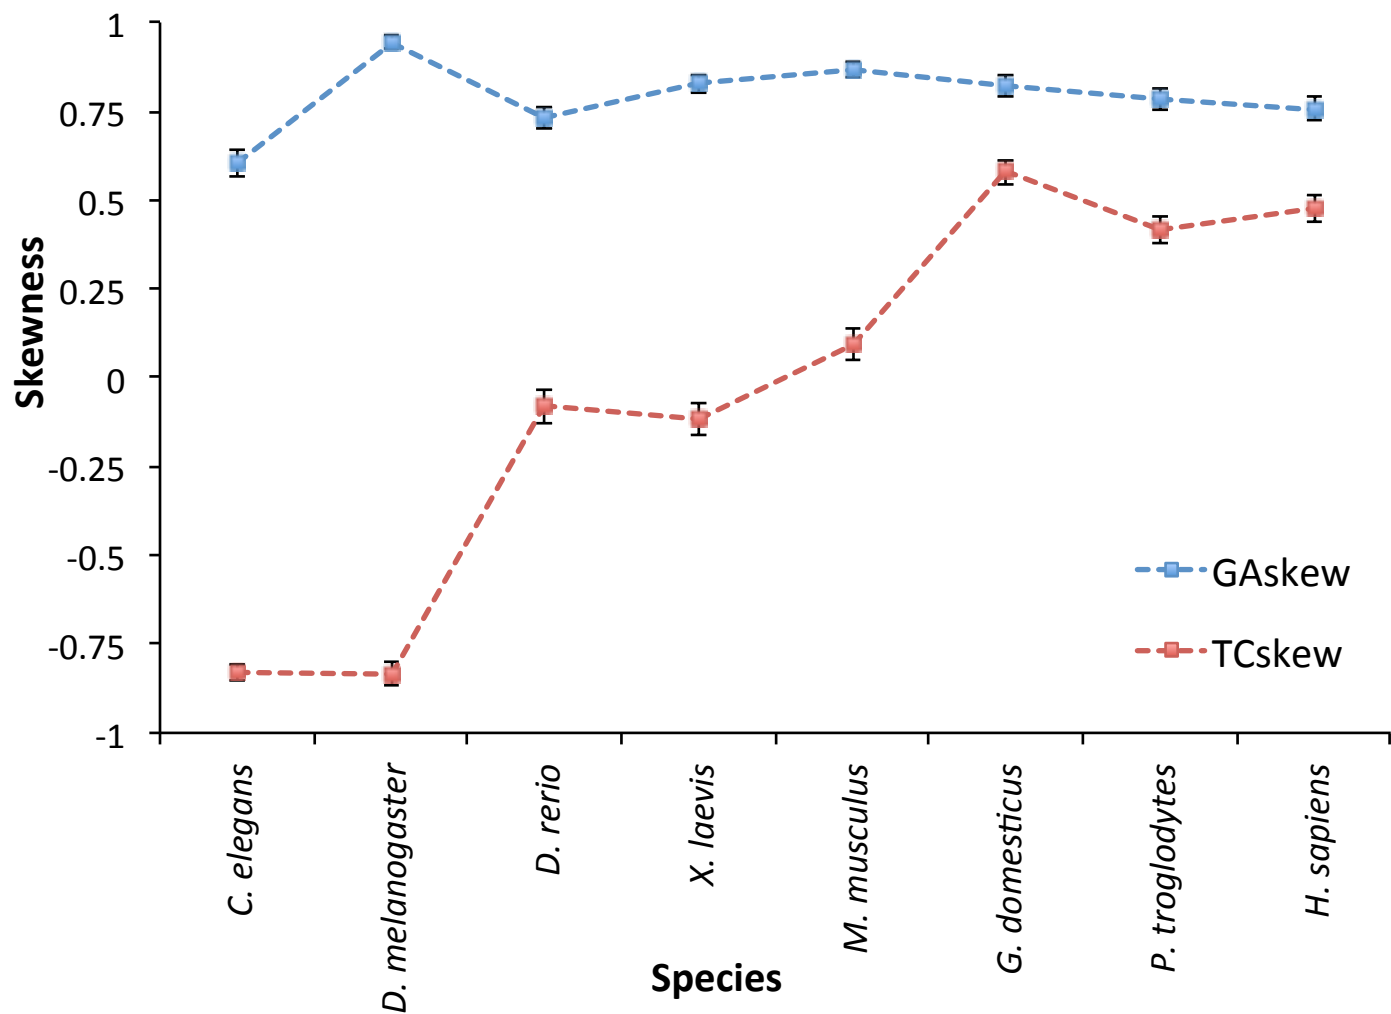

Supplement: supp [file elife-02935-supp-v1.zip]
